# Supplementary material for: Predicting cancer drug mechanisms of action using molecular network signatures†
Source: Royal Society of Chemistry journal article supplement (doi:10.1039/c2mb25459j), 2013-01-04
Supplement: c2mb25459j.7z [file c2mb25459j.7z]

## Sheet: CBL
	Simulated Signatures									Algorithm output					correction prediction:
shRNA's:	p53	Chk2	ATR	Chk1	ATX	DNAPKcs	Bok	Bim		class	LR	p-value			2 = Alkylating/Alkylating-like
	3.62994	4.06727	0.107492	-1.95778	-0.530599	0.826799	-1.28875	1.3663		2	1.06156	0.00537534
	3.81006	4.83723	-0.0117008	-1.76606	-0.536446	0.611862	-1.27757	1.42109		2	1.02037	0.00208694
	4.48633	3.92196	-0.313836	-1.80152	-0.654042	0.650791	-1.13331	1.64223		2	1.04241	0.00350153
	4.12914	4.77363	-0.345186	-1.89194	-0.585214	0.389861	-1.09317	1.18411		2	1.02351	0.00225009			100% correct classification
	3.81388	4.28519	-0.125393	-1.88157	-0.458883	0.584509	-1.11741	1.43558		2	1.0323	0.00277031
	4.05488	4.93141	-0.124339	-1.76986	-0.431904	0.58288	-1.22407	1.16775		2	1.02345	0.00224669
	3.93295	4.98875	-0.132122	-1.83592	-0.586142	0.708183	-1.25121	1.19817		2	1.02114	0.00212595
	3.84894	4.06538	0.120162	-1.93536	-0.421365	0.662855	-1.46918	1.49303		2	1.05882	0.00506073					Experimental Data
	3.92832	3.99093	-0.307399	-1.67005	-0.716612	0.658807	-1.29949	1.48274		2	1.05648	0.00480607				shRNA's:	p53	Chk2	ATR	Chk1	ATX	DNAPKcs	Bok	Bim
	4.05154	4.45696	-0.162875	-1.74023	-0.456364	0.734613	-1.10043	1.53176		2	1.00688	0.00150057			Replicates	1	3.92779	4.44681	-0.332246	-1.67611	-0.49275	0.266924	-1.17174	1.16775
	4.06047	4.81911	-0.0876723	-2.30143	-0.637624	0.440587	-1.46918	1.48506		2	1.03205	0.00275419				2	3.81112	3.92829	-0.401863	-1.74564	-0.925344	0.735847	-1.46918	1.43332
	3.97391	4.07415	-0.118677	-2.16994	-0.461385	0.424074	-1.33605	1.18298		2	1.06483	0.00577195				3	4.30458	4.30411	-0.0953131	-1.87352	-0.77879	0.476791	-1.29153	1.65145
	3.81915	4.57691	-0.175582	-1.75897	-0.768865	0.830603	-1.29205	1.20179		2	1.02316	0.0022315				4	4.48596	4.4421	-0.055519	-1.9495	-0.646619	0.67413	-1.29546	1.41805
	3.65246	4.4815	-0.363398	-1.77139	-0.564928	0.755382	-1.28282	1.34578		2	1.05881	0.00506058				5	4.39111	4.23447	-0.055519	-1.9495	-0.646619	0.67413	-1.29546	1.41805
	3.80532	4.28789	0.108718	-1.92811	-0.633796	0.658725	-1.24639	1.52792		2	1.01764	0.00195385				6	3.88944	4.08937	-0.171266	-1.66125	-0.585414	0.618996	-1.08727	1.44259
	3.88247	4.30969	0.193721	-1.69323	-0.536803	0.811553	-1.34996	1.29166		2	1.02478	0.00231921				7	4.04166	4.77879	-0.197878	-2.30143	-0.511113	0.830603	-1.34511	1.60595
	3.94839	4.24764	-0.36215	-1.72158	-0.776051	0.775777	-1.22452	1.41999		2	1.03128	0.00270512				8	3.62994	3.90427	0.220472	-1.87639	-0.36444	0.608747	-1.27439	1.20537
	3.95778	4.84887	0.220472	-1.69438	-0.641101	0.726824	-1.27148	1.6112		2	0.993855	0.00108152				9	3.79861	4.96532	-0.188742	-2.24401	-0.396156	0.498221	-1.13932	1.5024
	4.48596	3.90427	-0.258822	-1.82884	-0.394741	0.800636	-1.25943	1.34495		2	1.06013	0.00520918
	4.31335	3.92111	-0.392548	-1.85353	-0.661595	0.510125	-1.20614	1.38512		2	1.05427	0.00457601
	4.48487	4.52859	-0.0596296	-2.03525	-0.36444	0.746212	-1.08727	1.19997		2	1.00275	0.00135414
	4.41973	4.37709	-0.176907	-2.30143	-0.569526	0.652244	-1.11013	1.43266		2	1.00752	0.00152493
	3.82863	4.16104	-0.180146	-2.03751	-0.581226	0.60498	-1.29282	1.42905		2	1.04463	0.00368326
	3.80689	3.98129	-0.114847	-1.99977	-0.521244	0.830603	-1.43401	1.38939		2	1.07019	0.00647903
	4.39226	4.40621	0.00274753	-1.66679	-0.64627	0.578529	-1.23751	1.65145		2	0.988871	0.000951784
	3.62994	4.54586	-0.415069	-2.14396	-0.444025	0.527845	-1.08727	1.43109		2	1.07044	0.0065131
	4.14403	4.8803	-0.191828	-1.7379	-0.661728	0.614546	-1.29382	1.42603		2	1.00249	0.00134533
	4.23919	4.25843	-0.281988	-1.68003	-0.424182	0.266924	-1.30949	1.4087		2	1.05139	0.0042911
	3.91315	4.6912	-0.184901	-1.83152	-0.515179	0.830603	-1.23144	1.54384		2	1.01583	0.00186948
	4.07221	3.90427	-0.0567044	-1.85753	-0.488909	0.778779	-1.29819	1.61465		2	1.05075	0.00422989
	3.89895	4.49588	-0.183173	-1.70735	-0.595745	0.830603	-1.32232	1.20292		2	1.0283	0.00252122
	4.23718	3.92296	-0.103032	-1.90612	-0.925344	0.748719	-1.08727	1.52641		2	1.01828	0.00198399
	3.58439	4.51324	-0.159285	-1.78314	-0.449955	0.810555	-1.08727	1.46587		2	1.04879	0.0040478
	4.48596	4.02677	0.0583163	-1.99208	-0.617547	0.69932	-1.27131	1.2721		2	1.01928	0.00203266
	3.90956	4.7985	-0.162254	-2.04801	-0.452207	0.473898	-1.20516	1.51884		2	1.02671	0.00242842
	4.11671	4.46817	-0.0686158	-1.73585	-0.391049	0.550593	-1.08251	1.52653		2	1.00559	0.00145353
	4.43233	4.96532	-0.210792	-1.75953	-0.405069	0.795394	-1.28115	1.65145		2	1.01536	0.0018482
	4.13957	4.92989	0.111446	-1.90428	-0.795908	0.709316	-1.31848	1.34205		2	0.981583	0.000787663
	3.9034	3.90427	0.0892789	-1.66816	-0.347306	0.595189	-1.08727	1.42857		2	1.06097	0.0053059
	4.21367	4.11356	-0.152453	-2.25899	-0.925344	0.830603	-1.29308	1.65145		2	1.02635	0.00240729
	3.79901	4.0213	0.0121004	-1.66125	-0.404078	0.697323	-1.12444	1.26914		2	1.05778	0.0049464
	4.17654	3.92298	-0.114928	-1.91856	-0.566926	0.619565	-1.23577	1.65145		2	1.0413	0.00341307
	4.47171	4.90748	-0.282656	-2.26944	-0.581481	0.7566	-1.28098	1.50551		2	1.01553	0.0018559
	4.40581	4.96532	-0.26385	-1.66125	-0.373826	0.640633	-1.10693	1.45039		2	1.01588	0.00187181
	4.47029	4.15327	-0.104409	-1.71519	-0.405247	0.275231	-1.46918	1.20065		2	1.06215	0.00544443
	4.36342	4.51433	-0.215075	-1.89407	-0.72107	0.572155	-1.45896	1.43256		2	1.00824	0.00155217
	4.03654	4.15732	-0.117511	-1.89723	-0.51983	0.830603	-1.34201	1.65145		2	1.03272	0.00279765
	4.24562	4.03021	-0.372237	-2.05563	-0.487487	0.543995	-1.45518	1.34907		2	1.06828	0.00621844
	4.39278	4.21927	0.220472	-2.03828	-0.583437	0.506727	-1.24195	1.47862		2	0.998942	0.00123049
	3.75813	3.92198	-0.335495	-1.89367	-0.629761	0.662462	-1.33075	1.42438		2	1.0805	0.00805632
	4.14208	4.17936	-0.1721	-1.67604	-0.647003	0.640451	-1.27291	1.45273		2	1.01842	0.00199095
	4.39054	4.19977	-0.113471	-1.94724	-0.36444	0.701848	-1.4462	1.58541		2	1.03729	0.0031118
	4.02584	4.1333	0.00143864	-1.66125	-0.442156	0.716139	-1.46918	1.16775		2	1.05296	0.00444423
	4.25058	3.94695	-0.0945046	-2.06062	-0.381811	0.266924	-1.12765	1.35206		2	1.06069	0.00527347
	4.19372	4.31266	-0.180719	-1.6735	-0.631466	0.593885	-1.41722	1.38301		2	1.02097	0.00211722
	4.30184	4.01349	0.211348	-2.16796	-0.806252	0.565444	-1.21418	1.48179		2	1.01252	0.00172476
	4.2846	3.98857	-0.20984	-1.81819	-0.727146	0.814397	-1.32916	1.41711		2	1.03316	0.00282672
	4.48596	4.72802	-0.243064	-2.1562	-0.36444	0.657041	-1.17913	1.65145		2	1.01647	0.00189883
	4.38219	4.53416	-0.105116	-2.43942	-0.778891	0.266924	-1.29057	1.42041		2	1.02622	0.00240026
	4.10911	4.14777	-0.164446	-1.88999	-0.700727	0.551016	-1.10489	1.47249		2	1.01041	0.00163732
	3.80968	4.17917	-0.276712	-1.66125	-0.498096	0.567771	-1.23258	1.51652		2	1.05576	0.00472991
	4.45492	4.25892	0.220472	-1.7188	-0.7603	0.649927	-1.16847	1.61624		2	0.978424	0.000724981
	3.82343	3.91578	-0.129714	-1.73861	-0.43106	0.487847	-1.27968	1.33338		2	1.07721	0.00752001
	3.90182	4.62688	0.0544003	-1.87277	-0.867672	0.291511	-1.08881	1.4411		2	1.00047	0.00127888
	4.31804	4.06543	-0.328496	-2.10381	-0.925344	0.526388	-1.27072	1.56165		2	1.03466	0.00292767
	4.13413	4.20759	-0.357118	-1.88606	-0.711395	0.413309	-1.15742	1.51742		2	1.02837	0.00252567
	3.92011	4.2918	-0.21009	-1.93062	-0.903965	0.49748	-1.28098	1.43301		2	1.02215	0.00217806
	4.48596	4.69583	-0.23887	-1.84434	-0.600555	0.731044	-1.11051	1.43052		2	0.98563	0.000875273
	4.30445	4.42713	0.125421	-2.09329	-0.731649	0.654094	-1.36745	1.43416		2	0.986625	0.000898131
	3.62994	4.79853	-0.391703	-2.30474	-0.394846	0.64896	-1.46918	1.65145		2	1.09564	0.0109839
	4.15794	3.95118	-0.088116	-1.87907	-0.925344	0.610651	-1.08727	1.57315		2	1.01873	0.0020059
	3.96386	4.12885	0.0879343	-2.02048	-0.798197	0.749235	-1.27078	1.16775		2	1.02166	0.00215221
	3.88942	4.13242	-0.156728	-1.84402	-0.555959	0.718382	-1.15013	1.45343		2	1.03155	0.00272234
	3.72596	4.38569	-0.306663	-1.91896	-0.461907	0.565846	-1.40811	1.45549		2	1.06361	0.00562107
	4.48596	3.90427	-0.401863	-1.70827	-0.572977	0.514976	-1.44727	1.22215		2	1.08031	0.00802492
	3.83989	4.29559	-0.124701	-1.67841	-0.406852	0.700494	-1.26697	1.40068		2	1.04162	0.00343857
	3.62994	4.3303	-0.34734	-2.30143	-0.74197	0.615652	-1.08458	1.43982		2	1.06291	0.0055358
	3.91585	4.78362	-0.0439276	-1.94487	-0.883961	0.638536	-1.28909	1.39064		2	0.997862	0.00119739
	4.11409	4.43667	-0.18691	-1.89358	-0.599287	0.651219	-1.23473	1.52562		2	1.00007	0.00126607
	3.89541	4.05784	-0.214909	-1.67411	-0.724854	0.63078	-1.16151	1.44622		2	1.03888	0.00322877
	4.48596	4.66241	-0.22073	-1.6522	-0.561825	0.830603	-1.27838	1.60883		2	1.00155	0.00131397
	3.62994	4.53678	-0.153306	-2.30143	-0.49149	0.685362	-1.21538	1.45591		2	1.0571	0.0048727
	3.62994	4.96532	-0.0978718	-1.72826	-0.465537	0.684922	-1.21124	1.3411		2	1.04943	0.00410661
	3.79933	4.96532	-0.0921762	-1.69549	-0.584479	0.45271	-1.29613	1.16775		2	1.04221	0.00348506
	4.01232	4.52071	-0.299739	-2.18153	-0.777878	0.454318	-1.28439	1.58408		2	1.02522	0.00234352
	4.00527	4.14543	-0.297509	-1.87367	-0.570327	0.675532	-1.46197	1.41895		2	1.05118	0.00427053
	3.68854	4.81843	-0.135612	-1.86735	-0.569695	0.363963	-1.12932	1.191		2	1.04554	0.00376074
	4.01361	4.64727	0.220472	-1.78903	-0.450735	0.711804	-1.29633	1.42753		2	1.00005	0.00126533
	3.86352	4.80211	-0.304777	-1.74107	-0.582266	0.63136	-1.30141	1.23088		2	1.03769	0.0031411
	4.32229	4.86754	-0.347294	-1.74764	-0.798966	0.584742	-1.27856	1.65145		2	1.00655	0.0014887
	4.05982	4.21602	-0.055519	-1.70979	-0.925344	0.738739	-1.37111	1.48448		2	1.01133	0.00167503
	4.48596	4.7088	0.0169911	-1.69903	-0.925344	0.711717	-1.37423	1.45204		2	0.976261	0.000684738
	4.27053	3.91653	-0.195773	-1.92108	-0.863922	0.374133	-1.34449	1.30791		2	1.05043	0.00419928
	3.674	4.29602	-0.020316	-1.77661	-0.820712	0.437129	-1.08727	1.57342		2	1.03098	0.00268612
	4.11808	4.18443	-0.146439	-1.91013	-0.668797	0.515697	-1.28593	1.42419		2	1.01689	0.00191839
	3.77554	4.09773	-0.0870461	-2.30143	-0.435172	0.50914	-1.29403	1.55461		2	1.07251	0.00680787
	4.37879	4.34566	-0.241801	-2.23679	-0.914507	0.562997	-1.29543	1.18531		2	1.01879	0.00200868
	3.78287	4.36712	-0.330092	-1.66816	-0.59933	0.647447	-1.46918	1.44106		2	1.05953	0.0051414
	3.68003	4.10806	-0.0646837	-1.71663	-0.613746	0.782595	-1.10296	1.43005		2	1.04627	0.00382353
	3.75757	4.40607	0.0436252	-2.00852	-0.583965	0.634619	-1.10041	1.53456		2	1.01616	0.00188456
	3.85363	4.64627	-0.163883	-2.17852	-0.860513	0.627341	-1.40415	1.62433		2	1.02716	0.00245408
	4.06672	4.5354	0.0553253	-1.9077	-0.376478	0.830603	-1.18932	1.37727		2	1.003	0.00136238
	3.66909	4.062	0.0502641	-1.90791	-0.506421	0.523093	-1.41302	1.43693		2	1.06997	0.00644854
	3.96817	4.24223	-0.316433	-2.12582	-0.513559	0.613016	-1.23663	1.61616		2	1.04336	0.00357851
	4.10906	4.35984	-0.191418	-2.05487	-0.603768	0.512276	-1.14466	1.36399		2	1.00805	0.00154491
	4.3968	4.03675	-0.336259	-2.30143	-0.407826	0.266924	-1.34362	1.62396		2	1.08284	0.00845863
	3.97022	4.9285	-0.0815134	-2.07506	-0.514595	0.656169	-1.29428	1.61697		2	1.0177	0.00195629
	3.7293	4.12454	-0.0888612	-1.86924	-0.660237	0.491054	-1.32138	1.1897		2	1.0577	0.00493756
	3.8246	4.35646	-0.0547929	-2.00957	-0.837636	0.64448	-1.43431	1.58557		2	1.02711	0.00245144
	4.48596	4.96532	-0.0713906	-1.66125	-0.449611	0.515008	-1.24886	1.65145		2	1.00708	0.00150814
	4.40432	3.90427	-0.202839	-1.75672	-0.662552	0.309029	-1.29918	1.5915		2	1.05622	0.00477864
	3.95413	4.44346	-0.0827598	-1.65842	-0.925344	0.4741	-1.29709	1.29972		2	1.01215	0.0017088
	3.89851	4.43328	-0.00513002	-1.89238	-0.36444	0.780054	-1.28785	1.42817		2	1.02581	0.002377
	3.887	4.96532	-0.401863	-1.93777	-0.567935	0.266924	-1.40276	1.33713		2	1.06748	0.0061128
	3.84111	4.96532	-0.110691	-2.18426	-0.8189	0.566273	-1.13081	1.4956		2	1.01521	0.00184151
	3.68755	4.70796	-0.345252	-1.66622	-0.678364	0.364859	-1.41257	1.44191		2	1.06568	0.00587926
	4.46485	4.48413	-0.145976	-2.04289	-0.498422	0.303064	-1.44901	1.49131		2	1.03039	0.00264873
	3.79314	3.9182	-0.17931	-1.91353	-0.483515	0.625655	-1.37257	1.62373		2	1.07913	0.00782959
	4.48596	4.32209	-0.28574	-1.88237	-0.860499	0.801593	-1.08727	1.51619		2	0.992001	0.00103148
	4.2958	4.85581	-0.0835773	-1.73072	-0.465087	0.650032	-1.16301	1.23231		2	0.998389	0.00121342
	3.62994	3.90427	-0.119988	-1.84581	-0.41973	0.480928	-1.30677	1.47589		2	1.09433	0.0106974
	3.68281	4.10515	-0.16579	-2.30143	-0.423714	0.519141	-1.31984	1.65145		2	1.08725	0.00926482
	4.02056	4.62867	0.0315418	-2.09818	-0.593599	0.687595	-1.17013	1.65145		2	0.99256	0.00104635
	4.15471	3.91091	-0.33331	-2.0525	-0.605427	0.604995	-1.28265	1.42976		2	1.05923	0.00510742
	4.10566	4.55133	-0.115638	-1.95135	-0.573567	0.608632	-1.46918	1.64847		2	1.01664	0.00190702
	4.48596	4.17088	-0.113648	-2.10987	-0.925344	0.671363	-1.28348	1.68815		2	1.00865	0.00156805
	4.14084	4.11864	-0.183752	-1.85083	-0.637689	0.8289	-1.24488	1.26088		2	1.02425	0.00228988
	3.84712	4.17564	-0.0687331	-1.82798	-0.758628	0.642862	-1.25944	1.49196		2	1.02406	0.00227963
	4.34849	4.68181	-0.125288	-1.82688	-0.563971	0.729594	-1.22575	1.48735		2	0.984705	0.000854499
	4.09467	4.60344	0.220472	-1.97612	-0.472809	0.402805	-1.26482	1.41869		2	1.00287	0.00135801
	3.98914	3.90427	0.0839663	-2.28182	-0.383639	0.662141	-1.23079	1.29299		2	1.06774	0.00614657
	3.82891	3.91509	-0.0816994	-1.75194	-0.503893	0.682743	-1.08727	1.63438		2	1.05821	0.00499377
	3.62994	4.43743	-0.148823	-2.25249	-0.536525	0.640938	-1.29917	1.37424		2	1.05944	0.00513049
	3.62994	4.25603	-0.0840291	-1.6198	-0.529166	0.68397	-1.33142	1.65145		2	1.06155	0.00537365
	3.99715	4.20529	-0.190004	-1.82978	-0.384115	0.680268	-1.3118	1.24183		2	1.04552	0.00375908
	3.93718	3.91507	-0.0555865	-2.24835	-0.36444	0.75073	-1.45419	1.47608		2	1.08361	0.00859385
	4.07941	4.80478	-0.0634439	-1.91159	-0.796422	0.867949	-1.13553	1.60769		2	0.978385	0.000724227
	4.13763	3.90427	0.065604	-1.83326	-0.686519	0.674632	-1.29646	1.36469		2	1.03332	0.00283735
	3.7475	4.22908	-0.337809	-1.98277	-0.42885	0.639016	-1.22646	1.16775		2	1.07024	0.00648587
	3.62994	4.96532	-0.0886315	-1.89823	-0.810107	0.266924	-1.30753	1.60894		2	1.05349	0.00449789
	3.74288	4.96532	-0.0377248	-1.72775	-0.711018	0.621199	-1.25329	1.50699		2	1.02262	0.00220282
	3.75557	4.0408	0.0902317	-1.8715	-0.743961	0.386285	-1.28775	1.65145		2	1.05224	0.00437383
	4.34122	4.30556	-0.290222	-1.90176	-0.925344	0.678979	-1.29675	1.23507		2	1.01047	0.00163988
	4.4515	4.53051	-0.105173	-1.77303	-0.925344	0.757475	-1.26214	1.63918		2	0.97725	0.000702875
	4.21137	4.79984	0.220472	-1.93238	-0.925344	0.646387	-1.34135	1.23432		2	0.976363	0.000686596
	3.68596	4.65851	-0.237375	-1.66125	-0.480516	0.666805	-1.16808	1.62439		2	1.04528	0.00373798
	3.88241	3.94451	-0.239129	-1.80161	-0.986409	0.817552	-1.32386	1.47573		2	1.0549	0.00464096
	3.87865	4.22852	-0.159306	-1.81174	-0.571079	0.659738	-1.15824	1.48622		2	1.02478	0.00231939
	3.89411	3.90427	-0.335137	-2.10804	-0.562344	0.408741	-1.27305	1.19954		2	1.08758	0.00932639
	4.01445	4.4554	-0.355077	-1.66978	-0.54059	0.727591	-1.2806	1.56022		2	1.03043	0.0026512
	3.91758	4.70256	-0.215618	-1.9322	-0.83203	0.645655	-1.06718	1.16775		2	1.00595	0.0014665
	4.38909	4.33422	-0.154883	-1.81056	-0.424861	0.669044	-1.12563	1.4544		2	1.00473	0.00142271
	3.86989	4.08197	-0.22312	-1.66125	-0.523014	0.622878	-1.15412	1.20715		2	1.05441	0.00459066
	3.86772	3.95668	-0.0889342	-2.22332	-0.505429	0.306494	-1.14467	1.18656		2	1.07777	0.00760936
	3.89123	4.57493	-0.125456	-1.8791	-0.413219	0.524429	-1.08727	1.21407		2	1.02551	0.00235991
	3.62994	4.93612	-0.055519	-1.65821	-0.603642	0.552115	-1.16143	1.16775		2	1.04622	0.00381878
	3.74029	3.92567	-0.170287	-1.89106	-0.595421	0.675921	-1.43201	1.4833		2	1.07833	0.00769839
	4.26736	4.90176	-0.401863	-1.88324	-0.919936	0.585061	-1.0996	1.48106		2	1.0001	0.00126704
	3.78951	4.4294	-0.0449885	-2.23172	-0.636987	0.603104	-1.08727	1.42277		2	1.02214	0.00217751
	3.80368	4.59926	-0.168635	-1.87172	-0.562674	0.685663	-1.2619	1.51262		2	1.02278	0.0022109
	3.72348	4.74407	-0.401863	-1.95168	-0.775867	0.317916	-1.292	1.42011		2	1.05743	0.00490826
	3.90144	4.50151	-0.05917	-1.87701	-0.583565	0.698868	-1.41569	1.63679		2	1.02069	0.00210268
	3.7017	4.25406	-0.142684	-1.71356	-0.382501	0.678807	-1.40997	1.48609		2	1.06721	0.00607611
	4.00917	4.34902	-0.0265819	-2.30143	-0.514784	0.656008	-1.19089	1.16775		2	1.02892	0.00255877
	3.69231	4.3846	-0.401863	-1.73136	-0.559772	0.821134	-1.08727	1.52111		2	1.05362	0.0045104
	3.72975	3.92208	-0.401863	-2.30143	-0.389226	0.669998	-1.18006	1.34145		2	1.1064	0.0135908
	4.10007	3.90427	-0.257045	-1.73777	-0.852588	0.766492	-1.46918	1.16775		2	1.06591	0.00590894
	4.15536	4.25739	-0.0495605	-2.30143	-0.41512	0.750836	-1.32325	1.42364		2	1.0341	0.00288922
	3.97569	3.92476	-0.117055	-1.75938	-0.520272	0.661302	-1.27173	1.24307		2	1.05729	0.00489355
	4.44781	4.46224	-0.288016	-1.94002	-0.648508	0.722016	-1.19014	1.54958		2	0.996644	0.001161
	4.02781	3.90427	-0.103281	-1.90347	-0.925344	0.540708	-1.3934	1.43322		2	1.04905	0.00407132
	4.16677	4.56726	0.220472	-1.85355	-0.36444	0.778673	-1.23748	1.57204		2	0.995864	0.00113825
	4.20596	4.52107	-0.00766027	-2.24421	-0.822833	0.540245	-1.31587	1.61739		2	0.996732	0.0011636
	4.22518	4.54577	-0.317339	-1.89292	-0.388103	0.499649	-1.19584	1.20411		2	1.02956	0.00259728
	4.19902	4.14902	-0.126875	-2.27071	-0.662827	0.696379	-1.28622	1.4256		2	1.02562	0.00236603
	3.62994	3.91255	-0.177567	-1.78416	-0.36444	0.629712	-1.19373	1.16586		2	1.09832	0.0115883
	3.62994	4.40779	-0.0874125	-1.9406	-0.502367	0.680752	-1.23711	1.36898		2	1.04544	0.00375194
	3.80115	4.30672	-0.130624	-2.27627	-0.778961	0.764309	-1.29301	1.34217		2	1.03809	0.00316989
	4.43594	4.61896	-0.380655	-1.6889	-0.432773	0.582626	-1.35526	1.51458		2	1.03114	0.00269575
	3.98739	4.17519	-0.146218	-1.93443	-0.377033	0.567648	-1.24537	1.57192		2	1.04059	0.00335778
	4.3534	3.96324	-0.172621	-1.87052	-0.544062	0.644568	-1.29858	1.51464		2	1.0388	0.00322252
	4.22	4.62262	-0.172724	-1.72004	-0.925344	0.428892	-1.46918	1.43224		2	1.0113	0.00167383
	4.48896	4.28809	-0.248442	-1.6822	-0.845488	0.523409	-1.22569	1.39541		2	1.00645	0.00148474
	3.97174	4.04037	-0.169359	-1.79785	-0.433503	0.645802	-1.4378	1.51636		2	1.0605	0.00525163
	3.78431	4.30014	-0.055519	-2.16863	-0.577514	0.708195	-1.46918	1.20365		2	1.05462	0.00461235
	3.87535	3.92068	-0.187945	-2.16626	-0.36444	0.820384	-1.25516	1.37406		2	1.07946	0.00788325
	3.79168	4.79515	-0.157642	-1.96367	-0.818712	0.47315	-1.17011	1.43106		2	1.01657	0.00190342
	3.84633	4.36084	-0.354659	-1.9466	-0.565642	0.787137	-1.42937	1.44088		2	1.05174	0.00432459
	4.34584	4.29505	-0.386307	-1.65272	-0.394416	0.711722	-1.30114	1.44118		2	1.04185	0.00345704
	3.62994	4.49482	-0.292774	-1.77548	-0.877658	0.457584	-1.31284	1.27831		2	1.05506	0.00465749
	4.25642	4.62881	-0.0506573	-2.27885	-0.478343	0.70546	-1.32486	1.60866		2	1.01048	0.00164022
	3.94192	4.81272	0.00505764	-2.03226	-0.601413	0.601268	-1.3397	1.16775		2	1.01701	0.00192424
	3.91224	4.76754	-0.0860167	-2.30143	-0.372527	0.488991	-1.29438	1.16864		2	1.05063	0.0042185
	4.01755	4.46251	-0.296288	-1.96832	-0.469865	0.810469	-1.33695	1.41933		2	1.03026	0.00264066
	4.37455	4.41808	-0.129279	-1.73844	-0.445236	0.714529	-1.294	1.19782		2	1.01424	0.00179872
	3.91575	4.29268	-0.128834	-1.67455	-0.40488	0.552608	-1.29394	1.61791		2	1.04135	0.00341763
	4.20202	4.28544	-0.144115	-2.30143	-0.561707	0.635929	-1.1937	1.44969		2	1.01882	0.00201003
	4.23055	4.09894	-0.186249	-1.90541	-0.535337	0.638225	-1.14193	1.34823		2	1.02164	0.00215142
	3.65862	4.16543	0.0692985	-2.40009	-0.404132	0.830603	-1.22474	1.55635		2	1.07462	0.00712038
	3.88755	4.09158	-0.0854788	-2.27343	-0.543031	0.830603	-1.26255	1.43371		2	1.05057	0.0042131
	4.08184	3.92402	-0.26853	-1.84075	-0.616197	0.625953	-1.12391	1.42758		2	1.04548	0.00375526
	4.32677	4.078	-0.116382	-1.66125	-0.593461	0.632	-1.27917	1.63678		2	1.02516	0.00234013
	3.62994	4.9206	-0.158528	-2.00327	-0.558241	0.619383	-1.46918	1.65145		2	1.06256	0.00549351
	3.78915	4.48077	-0.0867395	-1.88558	-0.524242	0.82852	-1.46918	1.49913		2	1.03925	0.00325611
	4.1639	3.91357	-0.367344	-1.70075	-0.517842	0.65653	-1.26486	1.43536		2	1.06408	0.00567817
	4.26273	4.18795	-0.0397742	-1.86282	-0.37577	0.557741	-1.32903	1.16775		2	1.03569	0.00299843
	4.25534	4.32426	0.0648718	-1.66125	-0.385214	0.804186	-1.29014	1.44544		2	1.01159	0.00168551
	3.88477	4.33484	-0.115504	-2.30262	-0.564225	0.645619	-1.17776	1.54275		2	1.03209	0.0027567
	4.10277	4.033	-0.126716	-1.77953	-0.521593	0.784458	-1.25257	1.64488		2	1.03575	0.00300243
	3.88979	4.32474	-0.0807634	-1.7207	-0.494066	0.433421	-1.28302	1.43491		2	1.03377	0.00286746
	3.82986	3.92496	0.0290533	-1.88358	-0.507673	0.293698	-1.45014	1.43143		2	1.08196	0.00830463
	4.24004	4.47569	-0.225055	-1.84277	-0.497962	0.5485	-1.24812	1.56674		2	1.00845	0.00156017
	4.28171	4.55838	-0.166265	-1.90858	-0.925344	0.462176	-1.20534	1.17211		2	0.994224	0.00109174
	3.87585	4.4662	-0.24485	-2.18945	-0.647448	0.838036	-1.10185	1.42115		2	1.02212	0.00217629
	3.85434	3.99322	-0.338475	-2.23005	-0.598409	0.621668	-1.36872	1.42474		2	1.07902	0.00781188
	4.26219	4.1823	0.220472	-1.70291	-0.596455	0.618941	-1.45302	1.49613		2	1.01585	0.00187066
	3.71942	4.6053	0.220472	-1.96621	-0.499704	0.634992	-1.19123	1.16775		2	1.02734	0.0024646
	3.80287	4.30052	0.103103	-2.27222	-0.687066	0.652876	-1.31099	1.60994		2	1.03295	0.00281284
	4.48596	4.26924	-0.401863	-1.67028	-0.814777	0.441722	-1.311	1.20155		2	1.03747	0.00312505
	4.26896	4.29728	-0.281003	-2.30143	-0.424483	0.560099	-1.26371	1.34534		2	1.04255	0.00351229
	3.64271	4	-0.110119	-1.67377	-0.746607	0.679296	-1.28245	1.4055		2	1.06589	0.00590588
	4.47859	4.9326	-0.205285	-1.83071	-0.627275	0.809596	-1.29386	1.32983		2	0.998622	0.0012206
	3.98063	4.03439	0.220472	-2.30677	-0.448047	0.467551	-1.3728	1.5883		2	1.0613	0.0053447
	4.35962	4.65709	-0.218992	-1.98061	-0.584906	0.830603	-1.09262	1.55008		2	0.985617	0.000874967
	3.81671	3.9393	-0.113145	-2.08593	-0.36444	0.266924	-1.29292	1.22772		2	1.0949	0.0108223
	4.48596	4.60152	-0.200446	-2.11327	-0.925344	0.383374	-1.42362	1.43259		2	1.01127	0.00167257
	4.01678	4.81709	0.169592	-2.03346	-0.775862	0.6235	-1.25051	1.45388		2	0.982284	0.00080223
	3.6353	4.66115	-0.206294	-1.68336	-0.383916	0.491296	-1.24577	1.16775		2	1.06817	0.00620344
	3.84874	4.43432	0.220472	-1.74726	-0.649632	0.392783	-1.29583	1.64243		2	1.01966	0.00205136
	4.02615	4.26594	-0.235273	-1.94824	-0.36444	0.779589	-1.30269	1.21411		2	1.04543	0.00375061
	4.10546	3.90427	-0.401863	-2.01481	-0.590389	0.683636	-1.26231	1.45604		2	1.06519	0.00581646
	3.81438	4.36841	-0.368657	-1.88617	-0.36444	0.600874	-1.2184	1.51862		2	1.05692	0.00485307
	4.13657	4.56561	-0.267391	-2.30143	-0.473976	0.304516	-1.29202	1.20319		2	1.05023	0.00418079
	3.73096	4.59517	-0.115707	-1.6643	-0.78013	0.653053	-1.46918	1.65145		2	1.03919	0.00325147
	3.75081	4.08199	-0.0763627	-1.84	-0.584751	0.672381	-1.29148	1.16775		2	1.05693	0.00485494
	4.06094	4.15191	-0.0929165	-1.725	-0.711792	0.58477	-1.33252	1.40638		2	1.02124	0.00213082
	3.6355	4.5279	-0.139341	-1.66125	-0.771208	0.711646	-1.25022	1.60279		2	1.03564	0.00299518
	3.82363	4.5585	-0.175949	-2.22799	-0.396109	0.828217	-1.28065	1.32082		2	1.04676	0.00386594
	4.30517	4.30465	-0.286936	-1.72473	-0.601574	0.461411	-1.28785	1.60815		2	1.02294	0.00221956
	3.90052	3.99427	-0.129455	-1.67549	-0.870004	0.685063	-1.38398	1.40946		2	1.04851	0.00402183
	3.60132	4.41671	-0.185181	-1.76907	-0.61912	0.830603	-1.22015	1.20737		2	1.05217	0.00436684
	3.83589	4.79308	-0.152882	-1.66125	-0.453893	0.456828	-1.30053	1.44436		2	1.03925	0.00325575
	3.79741	4.04826	0.00283372	-2.26982	-0.517039	0.582476	-1.09986	1.45186		2	1.05423	0.00457242
	3.83346	4.31349	-0.129999	-1.75398	-0.573203	0.707748	-1.14957	1.42355		2	1.02199	0.00216982
	3.90287	4.35762	-0.110858	-2.21369	-0.614835	0.681938	-1.15818	1.63198		2	1.02113	0.00212539
	3.86226	3.90837	-0.354171	-1.81455	-0.384381	0.570128	-1.27512	1.38918		2	1.08802	0.0094114
	4.2654	4.51558	-0.0570894	-1.86822	-0.604132	0.696236	-1.33475	1.42225		2	0.990097	0.000982298
	3.62994	4.81556	-0.0715001	-1.88133	-0.80053	0.813407	-1.17043	1.3979		2	1.02386	0.00226862
	4.1357	4.1521	-0.0994398	-1.82309	-0.56428	0.53197	-1.33536	1.32091		2	1.02656	0.00241975
	3.77782	3.98648	-0.250994	-1.78916	-0.886636	0.647865	-1.46918	1.44044		2	1.07042	0.00651051
	4.36319	3.90427	-0.0886735	-2.19808	-0.585234	0.621809	-1.42748	1.35319		2	1.05619	0.00477601
	4.11196	4.85354	-0.150807	-2.30641	-0.565226	0.628215	-1.2783	1.38179		2	1.01801	0.00197126
	3.89588	4.22377	0.0718251	-1.67027	-0.479635	0.740871	-1.34865	1.38549		2	1.03347	0.00284706
	4.33104	4.60529	-0.14988	-1.72775	-0.722545	0.619064	-1.12977	1.46908		2	0.976862	0.000695702
	4.21049	3.92409	-0.14547	-1.95856	-0.925344	0.594813	-1.22167	1.43811		2	1.02973	0.00260815
	3.86247	4.10042	-0.115591	-2.26035	-0.56206	0.59095	-1.26862	1.30917		2	1.05481	0.00463157
	4.33133	4.87777	-0.353301	-1.95908	-0.539298	0.659032	-1.22244	1.65145		2	1.01301	0.00174556
	3.91951	4.50844	-0.0712744	-1.91803	-0.786062	0.830603	-1.2705	1.55146		2	0.999588	0.00125068
	4.09629	4.48343	-0.375465	-1.7163	-0.392072	0.688142	-1.17926	1.45917		2	1.03121	0.00270008
	3.9545	4.21294	-0.0445643	-1.66125	-0.540655	0.458963	-1.31004	1.44261		2	1.03357	0.00285383
	3.62994	4.12712	-0.199485	-2.104	-0.817439	0.40287	-1.2819	1.52858		2	1.0688	0.00628876
	4.20428	3.90427	-0.246532	-1.94841	-0.661704	0.266924	-1.08727	1.41956		2	1.05465	0.00461491
	3.99484	4.26749	-0.0187121	-2.24176	-0.82169	0.712105	-1.25301	1.44155		2	1.01216	0.00170929
	4.25756	4.4826	-0.370561	-1.85086	-0.8037	0.819902	-1.24017	1.43243		2	1.00389	0.00139315
	4.45283	4.96532	-0.152524	-1.92916	-0.922501	0.699854	-1.13949	1.48808		2	0.973216	0.000631575
	4.11463	3.95158	0.055896	-2.14022	-0.631001	0.70524	-1.28648	1.41773		2	1.03519	0.00296363
	4.37135	4.14189	-0.401863	-1.89092	-0.672397	0.546035	-1.11691	1.43263		2	1.02733	0.00246431
	4.26964	4.31046	-0.208649	-1.91989	-0.490422	0.64881	-1.19983	1.45157		2	1.00918	0.00158876
	4.39654	4.08912	-0.0773349	-1.92904	-0.36444	0.44644	-1.38881	1.62076		2	1.04705	0.00389165
	4.37897	4.17139	-0.096056	-1.71467	-0.432964	0.266924	-1.3229	1.34969		2	1.0439	0.00362256
	3.72895	4.64176	-0.210576	-2.05409	-0.765212	0.568167	-1.23856	1.42739		2	1.02872	0.00254651
	3.86789	4.03928	-0.381457	-1.74028	-0.407509	0.739355	-1.44011	1.43794		2	1.08449	0.00875269
	4.07002	4.34707	-0.0983525	-1.8976	-0.428849	0.424672	-1.29002	1.42287		2	1.02493	0.00232734
	3.89574	4.28851	-0.246095	-1.66125	-0.3808	0.653493	-1.29422	1.62296		2	1.05098	0.00425207
	3.91008	4.63841	-0.16795	-2.21534	-0.392467	0.736899	-1.2983	1.32851		2	1.03821	0.00317914
	3.86722	4.01215	-0.183188	-1.76805	-0.593732	0.635517	-1.29388	1.45055		2	1.05264	0.00441316
	4.25888	4.27226	-0.337326	-2.30143	-0.546279	0.549617	-1.26019	1.42064		2	1.03977	0.00329558
	4.43308	4.05006	-0.336995	-1.66125	-0.471985	0.481447	-1.16127	1.24682		2	1.05197	0.00434763
	4.03901	4.58157	-0.319016	-1.88078	-0.559747	0.644906	-1.17171	1.27246		2	1.0162	0.0018866
	3.7885	4.73131	-0.0865499	-1.83354	-0.548691	0.652932	-1.1025	1.46772		2	1.0135	0.00176656
	3.87957	4.78622	-0.0773784	-1.686	-0.821563	0.68727	-1.15417	1.60929		2	0.998113	0.001205
	4.01026	4.16957	0.220472	-1.66125	-0.47933	0.463925	-1.31562	1.50595		2	1.03118	0.00269837
	3.62994	4.48879	-0.160884	-2.25755	-0.79289	0.266924	-1.46918	1.19332		2	1.08011	0.00799103
	4.32797	4.62165	-0.0959758	-2.13978	-0.915039	0.295349	-1.18658	1.42493		2	0.994215	0.0010915
	3.62994	4.68332	-0.276364	-1.85016	-0.925344	0.610998	-1.48041	1.5191		2	1.05491	0.00464167
	4.30633	4.75037	-0.190879	-2.25702	-0.487977	0.592333	-1.20529	1.5826		2	1.01	0.00162088
	4.54502	4.16576	0.128698	-2.16174	-0.545441	0.491005	-1.14013	1.43969		2	1.00884	0.00157521
	3.71249	4.60826	-0.260764	-2.27362	-0.681581	0.645416	-1.32833	1.40844		2	1.05016	0.00417455
	3.85838	3.95988	-0.172918	-1.90216	-0.36444	0.695502	-1.42393	1.18499		2	1.0847	0.00879069
	3.87818	3.92425	0.220472	-1.88815	-0.522842	0.541578	-1.28073	1.20156		2	1.0581	0.00498181
	3.85458	3.90427	-0.00583181	-1.92536	-0.863887	0.681726	-1.12356	1.48186		2	1.03948	0.00327339
	4.44587	3.90863	-0.138723	-2.26546	-0.773807	0.624896	-1.15841	1.2298		2	1.04245	0.00350427
	4.26835	4.34796	-0.304545	-1.96015	-0.622804	0.769973	-1.29199	1.41784		2	1.01279	0.00173596
	4.1405	4.79702	-0.09281	-1.94958	-0.503096	0.275725	-1.27706	1.60786		2	1.01905	0.00202116
	4.19891	4.23594	-0.123755	-1.66125	-0.537827	0.754746	-1.29461	1.60852		2	1.01726	0.00193567
	4.33542	3.91431	-0.0542546	-2.30143	-0.555293	0.688814	-1.29205	1.34853		2	1.05102	0.00425542
	3.97237	3.97584	0.231447	-1.88366	-0.849926	0.493007	-1.20727	1.42951		2	1.02587	0.00238002
	3.90902	3.92639	-0.401863	-1.92835	-0.52633	0.442006	-1.35859	1.55308		2	1.0864	0.00910321
	4.48596	4.82194	-0.179566	-1.70497	-0.36444	0.467411	-1.24129	1.20174		2	1.02379	0.00226534
	4.38165	4.36922	-0.267429	-1.86846	-0.788144	0.266924	-1.29393	1.44111		2	1.01982	0.00205909
	3.88039	3.96764	0.201928	-2.12431	-0.690134	0.830603	-1.44405	1.43058		2	1.05267	0.00441581
	3.67981	4.96532	-0.288145	-2.27028	-0.537117	0.602003	-1.27224	1.64309		2	1.06547	0.0058524
	4.49905	4.96532	-0.333658	-1.74566	-0.586312	0.616626	-1.29894	1.56716		2	1.01524	0.00184317
	4.01794	4.05971	-0.138453	-1.66125	-0.479354	0.621959	-1.32883	1.45884		2	1.04692	0.00387974
	4.18977	4.91962	-0.055519	-2.30143	-0.804618	0.510505	-1.45261	1.5512		2	1.01648	0.00189955
	4.05865	4.80632	0.0471797	-1.94276	-0.36444	0.58094	-1.23934	1.43203		2	1.00871	0.00157032
	4.41224	4.78654	0.18742	-2.10131	-0.486359	0.660586	-1.12307	1.63755		2	0.97581	0.000676607
	4.48596	4.42547	0.0481133	-1.80889	-0.570467	0.830603	-1.41398	1.63139		2	0.998351	0.00121227
	3.86243	4.22219	-0.255697	-1.64359	-0.718036	0.38717	-1.32966	1.37109		2	1.0507	0.00422552
	3.67926	4.04354	-0.0729157	-2.01288	-0.456206	0.703582	-1.46918	1.65426		2	1.08159	0.00824158
	3.66308	4.06541	-0.417438	-1.86372	-0.36444	0.772093	-1.29629	1.16775		2	1.10137	0.0123127
	3.91574	4.07295	0.220472	-1.70427	-0.521524	0.599416	-1.32992	1.16775		2	1.0456	0.00376547
	4.48596	4.5628	-0.125264	-1.84276	-0.597851	0.703684	-1.27552	1.496		2	0.987497	0.000918641
	4.48596	4.41932	-0.0709882	-1.75488	-0.587084	0.51789	-1.08804	1.20723		2	0.993716	0.0010777
	3.92006	4.3195	-0.0954944	-2.30143	-0.552638	0.337392	-1.33708	1.43126		2	1.05003	0.00416211
	3.69412	3.91812	-0.23334	-1.82266	-0.450716	0.708144	-1.28592	1.47641		2	1.08582	0.00899582
	3.76152	4.52492	-0.401863	-2.27249	-0.368904	0.547457	-1.29936	1.62337		2	1.07672	0.00744211
	3.94579	4.19741	-0.100769	-1.94062	-0.36444	0.830603	-1.46918	1.38987		2	1.0539	0.00453861
	3.66225	4.2729	-0.184556	-1.83786	-0.632836	0.575963	-1.17246	1.58456		2	1.04537	0.0037458
	4.08701	4.61388	-0.123012	-1.78834	-0.388244	0.672455	-1.46918	1.45154		2	1.02754	0.00247661
	3.88259	4.346	-0.25162	-1.82564	-0.450872	0.441538	-1.14029	1.61872		2	1.03972	0.00329181
	3.9033	4.83713	-0.208043	-2.02155	-0.856998	0.595557	-1.19561	1.46919		2	1.00762	0.00152843
	4.17839	4.17538	-0.358882	-1.89907	-0.519498	0.485505	-1.43642	1.42661		2	1.05201	0.00435161
	3.71015	4.77916	-0.0412762	-2.25664	-0.632719	0.494671	-1.28485	1.2042		2	1.04537	0.00374562
	3.89075	4.61424	-0.0865868	-1.66125	-0.490948	0.452632	-1.12142	1.31136		2	1.0211	0.00212382
	4.42311	4.40101	-0.281237	-2.22419	-0.525062	0.655715	-1.19414	1.42233		2	1.01672	0.00191036
	4.35181	3.89796	0.084106	-2.26588	-0.637552	0.741482	-1.45474	1.42527		2	1.05142	0.00429402
	4.32108	4.18014	0.0135271	-1.75586	-0.851757	0.592214	-1.2856	1.65145		2	0.999118	0.00123596
	3.80229	4.38376	-0.328617	-1.66971	-0.639337	0.749735	-1.29018	1.61576		2	1.04337	0.00357863
	3.72227	3.90427	0.0733471	-1.98763	-0.452728	0.612732	-1.40904	1.41888		2	1.08072	0.00809319
	4.25884	4.41721	-0.13378	-1.76273	-0.774175	0.456643	-1.36774	1.4788		2	1.00309	0.00136565
	3.73828	4.07628	-0.0895934	-2.22058	-0.925119	0.525209	-1.31463	1.45894		2	1.0568	0.00484012
	4.23436	4.96532	0.034162	-2.29076	-0.36444	0.609361	-1.08727	1.23486		2	1.01584	0.00187002
	4.39686	4.1702	-0.276485	-1.67388	-0.486437	0.527135	-1.34089	1.45116		2	1.03903	0.00323947
	4.09363	4.38349	-0.055519	-1.77897	-0.901148	0.672028	-1.46918	1.43438		2	1.00668	0.00149348
	4.23114	4.39151	0.131861	-1.87014	-0.670565	0.771831	-1.24529	1.1682		2	0.987691	0.000923251
	4.03372	4.04415	-0.318521	-1.67338	-0.925344	0.830603	-1.20588	1.65145		2	1.03944	0.00327042
	4.15636	3.90721	-0.114555	-1.76368	-0.708212	0.690276	-1.09556	1.16775		2	1.03685	0.00308057
	4.27175	4.1927	-0.0302024	-1.92591	-0.519077	0.579693	-1.34242	1.23813		2	1.02077	0.00210708
	3.73179	4.05024	-0.244745	-1.72924	-0.36444	0.745592	-1.07035	1.65145		2	1.07239	0.00679068
	4.45865	4.01562	-0.131563	-1.89337	-0.501857	0.481182	-1.08727	1.19332		2	1.03514	0.00296027
	4.25778	4.35751	-0.0914823	-1.93423	-0.494495	0.596804	-1.08736	1.3217		2	0.997227	0.00117829
	3.8487	4.67438	0.220472	-2.09793	-0.453831	0.609707	-1.46918	1.27534		2	1.03476	0.00293429
	3.73763	4.65932	0.220472	-1.73667	-0.36444	0.507496	-1.46918	1.32108		2	1.05125	0.00427812
	3.95519	4.63182	-0.401863	-1.80005	-0.911679	0.830603	-1.27205	1.30802		2	1.02308	0.00222677
	3.81027	3.94875	0.0195476	-1.73395	-0.554926	0.649232	-1.22649	1.65145		2	1.05542	0.00469522
	3.96488	4.51479	-0.105794	-1.83173	-0.686104	0.503897	-1.35687	1.20426		2	1.01796	0.00196886
	3.8737	3.97527	-0.375254	-2.00321	-0.925344	0.681714	-1.46918	1.47728		2	1.07358	0.00696407
	3.79111	4.06982	-0.270773	-2.24468	-0.41787	0.682519	-1.32499	1.4394		2	1.0798	0.00793945
	4.48596	4.34132	0.105226	-2.27039	-0.584763	0.76736	-1.14649	1.50989		2	0.991841	0.00102727
	4.48596	4.40526	-0.399851	-1.99565	-0.434612	0.680593	-1.34085	1.65145		2	1.03651	0.00305586
	4.42976	4.41823	-0.0637571	-2.30143	-0.833236	0.741597	-1.30186	1.44102		2	0.996818	0.00116614
	4.2003	4.31416	0.220472	-2.18761	-0.925344	0.558846	-1.21122	1.64079		2	0.989028	0.000955647
	4.44154	4.01216	-0.072215	-1.91574	-0.489897	0.730277	-1.17964	1.39891		2	1.02473	0.0023162
	4.02051	3.90427	-0.0423008	-2.12765	-0.888763	0.78653	-1.26205	1.38328		2	1.04064	0.00336171
	4.48596	4.36368	-0.150625	-2.29254	-0.844706	0.640332	-1.26331	1.53475		2	1.00339	0.00137603
	3.77321	4.4776	-0.401863	-1.95291	-0.925344	0.502025	-1.33923	1.28473		2	1.04973	0.00413438
	4.48596	3.9618	0.0347392	-1.65936	-0.36444	0.266924	-1.27538	1.48485		2	1.05969	0.00515946
	4.32676	4.51728	0.220472	-2.30143	-0.809912	0.522603	-1.31192	1.25819		2	0.993965	0.00108455
	4.15472	4.0554	-0.287706	-1.66125	-0.697282	0.661317	-1.20514	1.58279		2	1.0334	0.00284282
	3.65811	4.74569	0.00569104	-2.21093	-0.925344	0.639296	-1.30898	1.44334		2	1.03087	0.00267862
	4.40763	4.44644	-0.187019	-1.66077	-0.785562	0.830603	-1.4428	1.18361		2	1.01397	0.00178661
	3.87753	3.98189	-0.401863	-2.30143	-0.4765	0.710961	-1.36341	1.47576		2	1.0918	0.0101643
	3.8775	4.00717	-0.174378	-1.66125	-0.850909	0.737897	-1.15659	1.65145		2	1.04113	0.00340009
	3.8479	4.15908	-0.0684599	-2.29579	-0.58983	0.267484	-1.13583	1.37726		2	1.05764	0.00493137
	3.88314	4.39948	-0.0747921	-1.88374	-0.397038	0.646156	-1.1639	1.49598		2	1.02257	0.00219976
	4.48093	4.23774	-0.410901	-1.69691	-0.951155	0.728233	-1.26134	1.47866		2	1.02141	0.00213933
	4.48596	4.96532	-0.155914	-2.30143	-0.767115	0.646743	-1.16695	1.64429		2	0.995849	0.00113783
	4.40615	4.78436	-0.152612	-1.77813	-0.681838	0.793956	-1.15114	1.25271		2	0.981903	0.000794281
	4.40888	4.50617	-0.055519	-1.66125	-0.905785	0.700094	-1.43111	1.4389		2	0.991562	0.00101996
	3.86797	4.20702	-0.0773157	-1.77317	-0.635009	0.43792	-1.11845	1.5532		2	1.02645	0.00241307
	3.86595	3.86773	-0.275986	-1.88567	-0.616473	0.645838	-1.29024	1.39223		2	1.07228	0.00677414
	4.04877	4.92292	0.382419	-1.91443	-0.792807	0.616311	-1.32062	1.42453		2	0.984253	0.000844516
	4.38239	4.37052	0.147968	-1.66125	-0.586552	0.499389	-1.35118	1.3042		2	1.00204	0.00133016
	4.00017	4.47885	0.220472	-1.79464	-0.599106	0.677181	-1.2917	1.39751		2	0.994256	0.00109264
	3.78514	3.9792	-0.153046	-1.66125	-0.803127	0.64814	-1.37334	1.46554		2	1.06108	0.00531916
	3.66804	4.6917	-0.355349	-2.16522	-0.475735	0.713303	-1.27552	1.43596		2	1.06297	0.00554243
	3.96567	4.38795	-0.10497	-1.69564	-0.55827	0.830603	-1.24877	1.45337		2	1.01312	0.00175018
	4.27764	4.56189	-0.106818	-1.83523	-0.537639	0.651646	-1.08727	1.22111		2	0.989219	0.000960379
	4.35183	4.37846	0.220472	-1.86732	-0.371579	0.371487	-1.27985	1.17212		2	1.021	0.00211848
	3.8291	4.33085	-0.227145	-2.2712	-0.908506	0.830603	-1.33634	1.16775		2	1.04753	0.00393384
	4.08877	3.99915	-0.133379	-1.887	-0.741454	0.715512	-1.34159	1.42696		2	1.03294	0.00281246
	3.85471	4.24394	-0.0848704	-1.80247	-0.593262	0.558775	-1.45495	1.31024		2	1.04374	0.00360919
	3.92295	4.61118	-0.0968592	-1.93791	-0.508479	0.681316	-1.31322	1.38116		2	1.01509	0.00183612
	4.40349	4.72032	0.0883362	-2.30143	-0.501096	0.616908	-1.31962	1.47606		2	1.0004	0.00127641
	4.48596	4.25654	-0.310491	-1.70999	-0.676228	0.611721	-1.46918	1.23337		2	1.03778	0.00314748
	3.70147	4.07249	-0.171123	-2.144	-0.672549	0.708502	-1.28374	1.19383		2	1.0669	0.00603595
	4.17982	4.52208	-0.226692	-1.66125	-0.490086	0.674061	-1.27119	1.19803		2	1.01934	0.00203553
	4.26119	4.63165	-0.332823	-2.30143	-0.925344	0.373245	-1.2353	1.41839		2	1.02115	0.00212608
	3.88805	4.96532	0.0438681	-1.93832	-0.41816	0.388614	-1.4003	1.51307		2	1.03979	0.00329685
	3.95666	3.92855	-0.0448013	-2.10959	-0.666397	0.650457	-1.32552	1.63488		2	1.05165	0.00431661
	3.61302	4.8604	0.0121326	-1.66125	-0.525595	0.440272	-1.30207	1.59861		2	1.0516	0.00431113
	4.48596	4.36016	-0.10309	-2.30143	-0.423329	0.672944	-1.37802	1.25907		2	1.03343	0.00284489
	3.84711	4.05186	-0.0326334	-2.13587	-0.636625	0.514529	-1.27247	1.1942		2	1.05332	0.00448045
	4.41059	4.40276	-0.0778985	-1.66125	-0.703998	0.746477	-1.32365	1.42248		2	0.992601	0.00104745
	4.44423	4.32091	0.130735	-2.04528	-0.563868	0.59669	-1.1858	1.43027		2	0.987424	0.000916907
	4.19778	4.26811	-0.0738745	-2.30143	-0.527339	0.69039	-1.07001	1.19132		2	1.01995	0.0020659
	3.88146	4.53495	-0.388328	-2.24945	-0.612919	0.752051	-1.2079	1.16775		2	1.04812	0.00398636
	3.77568	4.96532	-0.162133	-2.03027	-0.45552	0.783427	-1.30764	1.43908		2	1.04252	0.00350987
	4.12672	4.83492	-0.270058	-1.73921	-0.925344	0.556833	-1.09791	1.5072		2	0.992332	0.00104025
	4.219	4.96532	-0.212206	-2.25673	-0.925344	0.731007	-1.25286	1.16775		2	1.01129	0.00167326
	4.07978	3.88385	-0.0943939	-1.94326	-0.607427	0.602694	-1.32459	1.56428		2	1.05039	0.00419564
	4.32238	4.03063	-0.0570039	-1.68167	-0.53506	0.757336	-1.32123	1.38111		2	1.03024	0.00263974
	4.09772	4.32663	-0.26285	-1.89081	-0.592059	0.266924	-1.27844	1.43886		2	1.03491	0.00294445
	4.19509	4.21803	-0.276771	-1.69703	-0.381323	0.420337	-1.11032	1.20186		2	1.04511	0.0037235
	4.2943	4.14179	-0.127599	-1.63612	-0.43343	0.7896	-1.27249	1.65145		2	1.03089	0.00268041
	3.87921	4.14198	0.133494	-1.87843	-0.634553	0.810745	-1.34533	1.45533		2	1.02701	0.00244573
	3.73994	4.80828	-0.272622	-2.15293	-0.36444	0.639147	-1.32827	1.59889		2	1.06219	0.00544913
	3.71242	4.3037	-0.181971	-1.79073	-0.631912	0.557045	-1.33874	1.38324		2	1.0473	0.00391379
	4.48596	3.91311	-0.246917	-1.90605	-0.486007	0.517038	-1.28724	1.43073		2	1.05581	0.00473523
	4.0289	4.30946	-0.0674518	-1.67079	-0.542388	0.319298	-1.16254	1.42909		2	1.0238	0.00226543
	4.16224	3.95117	-0.166617	-1.80377	-0.482154	0.759525	-1.1412	1.58083		2	1.04029	0.00333486
	3.8607	4.59877	-0.222854	-1.73723	-0.505445	0.673912	-1.26398	1.18553		2	1.03415	0.00289258
	4.29912	3.92786	-0.401863	-1.66125	-0.721198	0.425764	-1.22924	1.465		2	1.05927	0.00511164
	4.19614	4.24232	-0.40038	-2.26068	-0.643327	0.718544	-1.14532	1.65145		2	1.03561	0.0029931
	4.48596	4.1533	0.149271	-1.69002	-0.596944	0.544442	-1.13423	1.55822		2	0.999045	0.00123368
	4.29596	4.30952	0.104446	-2.20508	-0.446993	0.410582	-1.29477	1.35378		2	1.02144	0.0021413
	3.80371	4.31089	-0.250036	-1.71715	-0.447234	0.639265	-1.30131	1.16775		2	1.05754	0.00492051
	4.44855	4.24165	-0.233854	-2.26894	-0.43928	0.625423	-1.41289	1.1892		2	1.0514	0.00429177
	3.68959	4.36238	-0.110364	-2.17355	-0.85759	0.420301	-1.17549	1.42929		2	1.03945	0.00327104
	4.41069	4.62607	-0.220023	-1.92994	-0.688132	0.767069	-1.34582	1.44503		2	0.994572	0.00110148
	4.48596	4.26227	-0.108975	-2.30143	-0.525213	0.575498	-1.14181	1.54899		2	1.01643	0.00189721
	4.05765	4.17028	-0.00793511	-1.99214	-0.69817	0.650478	-1.13412	1.32322		2	1.00464	0.00141951
	4.13159	4.16532	0.0790675	-1.86567	-0.479027	0.774925	-1.38989	1.56284		2	1.02296	0.00222033
	3.90068	4.85735	-0.210254	-1.92839	-0.718697	0.619977	-1.18433	1.47888		2	1.00928	0.00159237
	3.62994	4.96532	0.19117	-1.66584	-0.597823	0.473148	-1.28637	1.47735		2	1.04086	0.00337935
	4.42366	4.16501	-0.118182	-2.25879	-0.655607	0.762434	-1.16636	1.43985		2	1.01294	0.00174242
	3.80704	4.62675	-0.173601	-1.86663	-0.863425	0.490919	-1.23379	1.62197		2	1.01744	0.00194407
	4.13912	4.4331	-0.12461	-1.7403	-0.583737	0.547498	-1.34852	1.18622		2	1.01667	0.00190839
	4.48596	4.24557	-0.401863	-2.30143	-0.681842	0.566479	-1.30887	1.16775		2	1.04941	0.00410418
	3.74678	4.49894	-0.151474	-1.84364	-0.656146	0.600369	-1.23138	1.26571		2	1.02821	0.00251616
	3.9254	3.92604	-0.210254	-2.14967	-0.801813	0.719673	-1.26479	1.46151		2	1.0547	0.00462071
	4.24119	3.97003	-0.119564	-1.87123	-0.660331	0.827421	-1.46918	1.52077		2	1.04306	0.00355399
	3.82728	4.03355	-0.395382	-1.96164	-0.628695	0.319518	-1.11108	1.51975		2	1.07219	0.00676198
	3.84067	4.27868	-0.0320242	-1.91512	-0.55229	0.806225	-1.28973	1.4663		2	1.02566	0.00236824
	3.89208	4.10453	0.103911	-2.09426	-0.479606	0.544084	-1.28865	1.16775		2	1.04933	0.0040972
	4.325	4.3335	-0.183393	-2.12896	-0.657461	0.619794	-1.13147	1.54294		2	0.997763	0.00119439
	3.76646	4.37259	-0.167928	-1.67328	-0.784425	0.830603	-1.27892	1.59716		2	1.02971	0.00260653
	3.75007	4.13223	-0.181869	-1.87801	-0.670201	0.524846	-1.38408	1.47777		2	1.05621	0.00477764
	4.33343	4.18397	0.0530543	-2.13907	-0.557816	0.515964	-1.28142	1.43384		2	1.01341	0.00176254
	4.36984	4.17353	0.19556	-2.08184	-0.594143	0.78431	-1.23793	1.47948		2	0.998399	0.00121373
	3.87106	4.05052	-0.212641	-2.09981	-0.590513	0.830603	-1.28272	1.65145		2	1.05531	0.00468338
	3.62994	4.8003	-0.401863	-2.09235	-0.595911	0.505009	-1.22148	1.4235		2	1.06443	0.00572196
	3.88742	4.90074	0.220472	-1.83746	-0.795967	0.675559	-1.46918	1.47742		2	1.00856	0.00156449
	4.30385	4.26235	0.164825	-2.24501	-0.371573	0.407531	-1.27924	1.27316		2	1.03297	0.00281434
	4.41479	4.3159	-0.414958	-1.72759	-0.433834	0.629117	-1.08727	1.55002		2	1.02912	0.00257072
	3.99314	4.30873	-0.288312	-1.87842	-0.485194	0.570712	-1.29664	1.5075		2	1.03424	0.00289872
	4.20541	4.70953	-0.172191	-1.81253	-0.686481	0.582493	-1.33903	1.18099		2	1.00504	0.00143378
	3.89058	4.71323	-0.184311	-1.95264	-0.467241	0.830603	-1.25737	1.42994		2	1.02304	0.00222478
	3.92396	4.14067	-0.144055	-1.9111	-0.67915	0.675338	-1.276	1.43363		2	1.02754	0.00247624
	3.6352	4.54214	-0.401863	-1.95715	-0.546147	0.544628	-1.08727	1.42544		2	1.05759	0.0049261
	3.84455	4.31837	-0.169168	-2.30143	-0.732901	0.266924	-1.43063	1.25599		2	1.06664	0.00600237
	4.48596	4.06684	-0.209044	-2.48323	-0.801401	0.34865	-1.23045	1.42266		2	1.05458	0.00460839
	3.8236	4.37456	-0.212391	-1.71607	-0.36707	0.774066	-1.29538	1.55515		2	1.04823	0.00399663
	4.05701	4.30176	-0.0617466	-1.93936	-0.843949	0.635505	-1.35704	1.63679		2	1.0063	0.00147933
	3.72542	4.7281	0.0744035	-1.69476	-0.594727	0.446697	-1.34344	1.31261		2	1.03436	0.00290685
	4.14134	3.90427	-0.0810256	-1.66125	-0.501811	0.469648	-1.45389	1.51614		2	1.06584	0.0058997
	3.94294	4.96532	-0.156728	-2.10084	-0.593125	0.628643	-1.29182	1.56164		2	1.02155	0.00214665
	4.48596	4.83891	-0.254379	-1.92285	-0.453798	0.570951	-1.26676	1.43266		2	1.01086	0.00165559
	3.79782	4.42114	-0.155912	-1.92834	-0.607176	0.739388	-1.28452	1.4181		2	1.02562	0.00236587
	4.19873	4.4484	-0.401863	-1.78189	-0.756201	0.802002	-1.42626	1.43493		2	1.02547	0.00235766
	3.87919	4.05583	-0.234428	-1.66125	-0.381625	0.63208	-1.40497	1.61654		2	1.07477	0.00714239
	4.18211	4.24102	-0.0890982	-2.25255	-0.40705	0.443488	-1.38842	1.16775		2	1.05255	0.00440424
	3.74741	4.96532	-0.348129	-2.11941	-0.589619	0.598726	-1.29511	1.45378		2	1.0545	0.00459996
	4.40315	4.1614	-0.182425	-1.77296	-0.374054	0.422634	-1.2849	1.16775		2	1.04769	0.00394793
	4.05169	4.44916	-0.282105	-1.90287	-0.368785	0.729697	-1.29099	1.65145		2	1.03377	0.00286737
	4.48596	4.05877	-0.215587	-1.82956	-0.767224	0.305427	-1.44106	1.34976		2	1.04851	0.00402202
	3.80987	3.92768	0.00857804	-1.90059	-0.925344	0.545961	-1.24547	1.52504		2	1.04761	0.00394139
	3.96924	4.58585	-0.401863	-1.66125	-0.581614	0.619326	-1.23686	1.43247		2	1.03159	0.00272487
	3.90392	4.96805	-0.161684	-1.86385	-0.371283	0.744259	-1.15172	1.65145		2	1.02987	0.00261633
	4.42797	4.32232	0.220472	-2.12092	-0.625842	0.751908	-1.08727	1.44731		2	0.976693	0.000692614
	3.92537	4.51781	-0.190081	-1.91312	-0.445508	0.477338	-1.33059	1.60688		2	1.03375	0.0028657
	3.83983	4.7815	-0.104416	-2.08908	-0.508467	0.697938	-1.3058	1.44228		2	1.02592	0.00238279
	4.01282	4.37509	-0.292633	-1.67874	-0.893647	0.588572	-1.29167	1.23247		2	1.02347	0.0022479
	3.99886	4.1168	-0.139135	-1.91959	-0.925344	0.444199	-1.12182	1.16775		2	1.02742	0.00246964
	4.16197	4.96532	-0.2633	-1.73294	-0.522175	0.830603	-1.08727	1.20102		2	1.01391	0.00178436
	3.77424	4.37564	-0.185954	-1.9089	-0.36444	0.830603	-1.32653	1.35005		2	1.05258	0.0044069
	3.89287	4.70277	-0.342296	-2.09627	-0.819683	0.414727	-1.22464	1.65145		2	1.03163	0.00272702
	3.96717	4.42323	-0.0929593	-1.66125	-0.542289	0.558678	-1.18663	1.61746		2	1.01345	0.00176428
	4.06248	4.24209	-0.00200171	-1.66843	-0.73435	0.674484	-1.32536	1.44504		2	1.00788	0.0015384
	4.46391	4.95697	-0.210417	-1.66125	-0.377123	0.614117	-1.26755	1.44105		2	1.01944	0.00204037
	4.42368	4.10019	-0.185866	-1.7369	-0.476074	0.258211	-1.30283	1.40315		2	1.04969	0.00413017
	4.17382	3.90427	-0.00205483	-1.93636	-0.500014	0.64641	-1.12156	1.20375		2	1.04123	0.0034082
	3.98911	4.70675	0.202725	-1.78908	-0.441116	0.830603	-1.29227	1.62596		2	1.00385	0.00139183
	3.91632	4.03163	-0.401863	-1.84142	-0.869488	0.614102	-1.39326	1.70023		2	1.06574	0.00588675
	4.48596	4.30348	-0.223252	-2.28373	-0.779504	0.69349	-1.46093	1.19043		2	1.03456	0.00292061
	4.36408	4.36448	0.220472	-1.6758	-0.745296	0.502474	-1.28291	1.45227		2	0.984446	0.000848751
	4.18279	4.36523	-0.147048	-1.53695	-0.36444	0.512705	-1.29723	1.43466		2	1.03393	0.00287819
	4.40779	4.43484	-0.330101	-1.66125	-0.446741	0.635346	-1.46918	1.55322		2	1.03879	0.003222
	4.06249	4.34627	0.220472	-1.99811	-0.395542	0.662755	-1.28029	1.3005		2	1.01449	0.00180981
	4.43807	4.28802	-0.0874014	-1.86101	-0.526324	0.792366	-1.28726	1.42453		2	1.00378	0.00138926
	4.48596	3.90427	0.179342	-1.90311	-0.521606	0.539593	-1.10647	1.22388		2	1.0324	0.00277686
	4.19367	4.34274	-0.13021	-2.07426	-0.925344	0.718116	-1.32948	1.53253		2	0.998921	0.00122985
	3.72484	4.08218	-0.184065	-2.30143	-0.398074	0.506534	-1.13803	1.42487		2	1.07911	0.00782618
	4.42284	4.2606	-0.174745	-1.67166	-0.537668	0.419374	-1.11364	1.32057		2	1.01639	0.0018951
	4.2411	4.04245	-0.0132165	-1.89999	-0.65834	0.608891	-1.1824	1.25437		2	1.01603	0.00187891
	3.96766	4.08614	-0.165567	-1.91958	-0.36444	0.817523	-1.18261	1.51279		2	1.04651	0.00384433
	3.57777	4.96532	-0.149554	-2.29228	-0.670448	0.781636	-1.21375	1.42824		2	1.05664	0.00482332
	4.30248	4.38917	-0.0747275	-1.92742	-0.798075	0.411963	-1.21113	1.16775		2	0.999222	0.0012392
	3.97197	4.42644	0.112438	-1.92745	-0.925344	0.830603	-1.26117	1.16775		2	0.996442	0.00115507
	4.12222	4.38033	-0.230389	-1.66125	-0.662936	0.686085	-1.15626	1.48394		2	1.00297	0.00136163
	3.73299	4.31214	0.00455016	-1.9203	-0.386825	0.714483	-1.34451	1.23308		2	1.05244	0.00439323
	3.86405	4.53834	-0.328591	-2.29667	-0.925344	0.408707	-1.31928	1.46134		2	1.04635	0.00382977
	4.31506	4.04735	-0.225674	-2.04443	-0.396145	0.435232	-1.27462	1.32769		2	1.05313	0.00446175
	4.42146	3.92118	-0.461073	-2.19387	-0.632882	0.624423	-1.46918	1.16775		2	1.08656	0.00913335
	4.47331	4.73328	0.130156	-1.85389	-0.763515	0.781826	-1.39994	1.25377		2	0.979065	0.000737315
	3.93034	4.09949	-0.223484	-2.30143	-0.653458	0.682806	-1.2892	1.65145		2	1.05433	0.00458259
	3.62994	3.96546	0.0153364	-1.66125	-0.764696	0.520501	-1.17256	1.4192		2	1.06348	0.0056043
	3.82776	3.90427	-0.0711977	-2.23851	-0.769962	0.623554	-1.16134	1.32412		2	1.05954	0.00514164
	3.63525	3.96173	-0.271544	-1.68608	-0.535446	0.41731	-1.42964	1.60004		2	1.10245	0.0125782
	4.39304	4.03735	-0.218972	-1.87938	-0.491652	0.605834	-1.39889	1.58518		2	1.04548	0.00375489
	3.64231	4.16021	0.15435	-1.66125	-0.506706	0.625377	-1.32278	1.19435		2	1.06332	0.00558574
	4.03036	4.79585	-0.207185	-2.14186	-0.56197	0.687491	-1.3418	1.63554		2	1.02099	0.00211796
	3.92496	4.03604	-0.0357215	-1.9422	-0.925344	0.437842	-1.28407	1.47991		2	1.03541	0.00297873
	3.77521	3.98967	-0.345629	-2.01257	-0.64708	0.730988	-1.13887	1.4921		2	1.0648	0.00576817
	4.23856	4.22017	-0.0492086	-2.03029	-0.375804	0.518941	-1.16123	1.43036		2	1.02004	0.00207007
	3.82984	4.61313	-0.367075	-1.81805	-0.365916	0.504845	-1.16148	1.3476		2	1.05141	0.00429277
	4.0959	4.20478	-0.108991	-1.67105	-0.36444	0.382915	-1.19497	1.55036		2	1.04001	0.00331397
	3.91844	4.18062	-0.202272	-1.91559	-0.876064	0.775498	-1.20968	1.19569		2	1.02731	0.00246276
	3.71432	4.68883	0.220472	-1.96215	-0.882475	0.566806	-1.14749	1.52585		2	1.00324	0.00137079
	3.62994	4.18365	-0.156195	-1.81711	-0.434287	0.497259	-1.46918	1.45188		2	1.08226	0.00835656
	3.80066	4.02153	-0.144903	-2.18473	-0.925344	0.647246	-1.17638	1.31501		2	1.04938	0.00410204
	4.1668	4.88126	-0.337025	-1.899	-0.785815	0.266924	-1.28857	1.56414		2	1.02574	0.00237304
	3.81061	4.34135	-0.0997685	-1.7291	-0.586339	0.706706	-1.09817	1.2903		2	1.02201	0.00217047
	3.86354	4.45314	-0.16947	-1.89763	-0.848074	0.351803	-1.17313	1.4177		2	1.01885	0.00201174
	4.41013	4.35638	0.220472	-1.66125	-0.572653	0.546577	-1.21324	1.52947		2	0.987437	0.0009172
	3.85554	3.93668	-0.221521	-1.89878	-0.727083	0.574193	-1.35207	1.49958		2	1.06252	0.00548891
	3.79838	4.179	-0.119141	-1.88424	-0.844557	0.797349	-1.46918	1.44508		2	1.04392	0.00362409
	3.77646	4.89226	-0.292456	-2.01696	-0.675934	0.544533	-1.46918	1.46334		2	1.05156	0.00430773
	4.3869	4.42787	-0.401863	-1.66125	-0.572371	0.568471	-1.15774	1.44128		2	1.01861	0.0020001
	3.62994	4.32413	-0.118058	-1.66125	-0.493318	0.656567	-1.15567	1.62537		2	1.05166	0.00431752
	3.62994	4.89806	-0.165982	-2.27536	-0.612724	0.646185	-1.12194	1.58864		2	1.04885	0.00405317
	3.62994	4.30065	0.0294637	-2.30143	-0.608697	0.411081	-1.36398	1.4777		2	1.06681	0.00602476
	3.64572	4.05199	-0.299717	-2.16954	-0.577685	0.731846	-1.10442	1.47575		2	1.07467	0.00712667
	4.45075	4.3659	0.0896076	-1.66125	-0.387644	0.567979	-1.3468	1.18662		2	1.02064	0.00210045
	3.62994	4.16641	-0.189319	-1.89316	-0.416027	0.761748	-1.33781	1.48105		2	1.07363	0.00697116
	4.25131	3.90427	0.0633022	-2.02899	-0.673321	0.584926	-1.25457	1.65145		2	1.03244	0.00277917
	3.76296	4.24183	-0.220823	-1.78389	-0.774304	0.622563	-1.23997	1.29423		2	1.03869	0.0032144
	4.05998	4.1085	-0.174258	-2.14085	-0.669102	0.348758	-1.2215	1.65145		2	1.04146	0.00342617
	3.68652	4.36864	-0.096299	-1.78162	-0.70305	0.715926	-1.10802	1.36009		2	1.02584	0.00237838
	3.99536	3.99787	-0.187271	-1.98698	-0.555115	0.266924	-1.24391	1.65145		2	1.06304	0.0055516
	3.995	4.26234	-0.142836	-1.89721	-0.583155	0.325752	-1.31754	1.16775		2	1.04252	0.0035102
	3.72817	4.36865	-0.401863	-2.30143	-0.570353	0.747335	-1.33771	1.47837		2	1.07193	0.00672449
	3.62994	4.8105	-0.0110234	-1.87922	-0.63957	0.607632	-1.17362	1.25994		2	1.03147	0.00271715
	4.46826	4.33625	0.0995208	-1.75342	-0.448084	0.668656	-1.43513	1.1849		2	1.01944	0.00204041
	3.67245	4.39896	-0.401863	-2.03101	-0.527305	0.810918	-1.18152	1.65145		2	1.06228	0.0054603
	4.27798	4.09392	0.220472	-2.30143	-0.3625	0.830603	-1.27849	1.35464		2	1.03916	0.00324923
	3.85206	4.99174	-0.218652	-2.30143	-0.631271	0.60646	-1.13575	1.33995		2	1.03635	0.00304502
	4.48596	4.2255	0.220472	-1.88742	-0.911183	0.581026	-1.30717	1.43263		2	0.986727	0.000900507
	4.03095	4.40553	-0.401863	-2.01569	-0.493748	0.646474	-1.29796	1.43439		2	1.03807	0.00316832
	3.74753	4.96532	-0.186169	-1.74741	-0.658403	0.294357	-1.28286	1.17044		2	1.05557	0.00471085
	4.14597	4.20722	-0.20424	-2.30143	-0.5249	0.562809	-1.19739	1.37823		2	1.03535	0.00297455
	3.85405	4.1618	-0.368076	-1.74342	-0.75499	0.859988	-1.34074	1.643		2	1.05448	0.00459785
	4.32013	3.9359	-0.401863	-1.71246	-0.504819	0.591319	-1.32957	1.52364		2	1.06651	0.00598558
	3.74699	3.98697	0.179678	-1.8708	-0.46349	0.770623	-1.34256	1.42307		2	1.06161	0.00538124
	4.4008	4.96532	-0.205904	-2.19444	-0.636633	0.266924	-1.1674	1.2593		2	1.02179	0.00215915
	3.90479	4.56831	-0.17123	-1.94563	-0.610419	0.830603	-1.15234	1.53941		2	1.00674	0.00149572
	4.05827	4.30327	-0.352795	-1.8062	-0.502374	0.418525	-1.28728	1.49631		2	1.04184	0.0034555
	3.90907	4.24796	0.225711	-2.29275	-0.440779	0.627272	-1.15034	1.52509		2	1.03189	0.00274381
	3.82123	4.44573	-0.401863	-1.67047	-0.660614	0.830603	-1.26917	1.65145		2	1.04541	0.00374906
	4.01556	4.59178	-0.15365	-1.90895	-0.453856	0.700555	-1.36815	1.42757		2	1.01902	0.00201983
	3.86054	4.86884	-0.223834	-1.79473	-0.37719	0.62308	-1.46918	1.49402		2	1.05295	0.00444342
	3.85126	4.40773	0.220472	-1.66125	-0.382327	0.76518	-1.34286	1.61918		2	1.03235	0.00277341
	4.02612	4.2783	-0.136955	-1.87595	-0.886568	0.503707	-1.34045	1.44188		2	1.01397	0.00178702
	4.35703	4.23314	-0.0768434	-2.14134	-0.517697	0.488293	-1.14363	1.45307		2	1.01126	0.00167227
	3.62994	4.0847	-0.16274	-2.25815	-0.358844	0.392796	-1.20598	1.43851		2	1.0936	0.0105424
	3.95906	4.32168	0.00698359	-1.86338	-0.758287	0.494911	-1.08727	1.47376		2	0.996875	0.00116783
	4.27232	4.96532	-0.34865	-1.7143	-0.635974	0.488502	-1.13251	1.47873		2	1.01177	0.00169308
	3.88506	4.26734	-0.208584	-2.19673	-0.525672	0.65522	-1.32832	1.42684		2	1.04512	0.00372441
	3.78318	4.11599	-0.0236133	-1.8792	-0.438641	0.331243	-1.29249	1.45793		2	1.06258	0.00549625
	3.84118	4.29106	-0.206232	-2.26737	-0.51898	0.520639	-1.46918	1.26137		2	1.06765	0.00613442
	3.69742	3.90427	-0.0949898	-1.66125	-0.830257	0.732804	-1.20475	1.16775		2	1.06983	0.00642854
	4.02487	4.30154	0.149756	-1.91961	-0.393031	0.675331	-1.27951	1.16775		2	1.02469	0.00231409
	4.39597	3.9871	-0.115278	-2.27131	-0.509942	0.598511	-1.28696	1.3406		2	1.04799	0.00397544
	4.35726	4.58306	-0.209474	-1.66125	-0.925344	0.699213	-1.29574	1.55008		2	0.989222	0.000960449
	3.84984	4.24005	-0.446212	-1.73422	-0.36444	0.266924	-1.2938	1.35931		2	1.0876	0.00933073
	3.62994	4.95491	-0.079578	-1.67291	-0.499272	0.577834	-1.28699	1.46817		2	1.05134	0.00428662
	3.90938	4.15275	-0.0928038	-1.87399	-0.388974	0.643867	-1.16197	1.43843		2	1.03784	0.00315195
	3.80449	4.34394	-0.172298	-2.01755	-0.633036	0.266924	-1.12529	1.46456		2	1.04067	0.00336416
	3.95245	3.91659	0.202272	-1.67591	-0.517579	0.727468	-1.08727	1.16		2	1.04754	0.00393498
	4.04323	4.231	0.220472	-1.95873	-0.912354	0.496963	-1.30513	1.2577		2	1.00653	0.00148794
	4.02365	4.23729	-0.122015	-2.27109	-0.851886	0.672353	-1.29204	1.42416		2	1.02218	0.00217969
	3.83588	4.42429	0.220472	-2.30143	-0.763948	0.573806	-1.22717	1.4714		2	1.01659	0.00190455
	3.69022	4.40371	-0.184914	-1.79901	-0.925344	0.551804	-1.46918	1.44069		2	1.04826	0.00399898
	3.94671	3.91543	-0.0707784	-1.75769	-0.573632	0.50574	-1.46918	1.42365		2	1.06755	0.00612201
	3.92496	4.24355	-0.106411	-2.01045	-0.424613	0.485786	-1.26888	1.65145		2	1.04086	0.00337914
	4.38223	4.8527	-0.0581146	-1.93952	-0.522688	0.499448	-1.28562	1.56397		2	0.995376	0.00112423
	4.48596	4.26187	-0.156059	-1.81463	-0.568735	0.500348	-1.17985	1.42014		2	1.0071	0.00150883
	4.38328	4.07546	0.0475863	-2.09182	-0.36444	0.432738	-1.2944	1.43311		2	1.03999	0.00331194
	3.79103	4.76196	-0.163645	-1.68473	-0.474916	0.642367	-1.22702	1.54377		2	1.0316	0.00272526
	3.59018	4.46272	-0.100185	-1.67103	-0.676917	0.430557	-1.47327	1.25593		2	1.06748	0.00611163
	4.08218	4.17069	0.00607696	-1.74278	-0.644316	0.537069	-1.21414	1.44106		2	1.00997	0.00161967
	3.62994	4.96532	-0.080472	-2.04835	-0.690715	0.51779	-1.4186	1.30881		2	1.05431	0.00457992
	4.09777	4.4044	-0.370965	-1.66125	-0.428575	0.471842	-1.21947	1.16775		2	1.04751	0.00393175
	4.01741	4.26796	0.0882036	-1.67913	-0.832739	0.747802	-1.27706	1.5377		2	0.99905	0.00123383
	4.05878	4.15696	-0.42774	-1.675	-0.677242	0.547485	-1.16193	1.54686		2	1.04202	0.00347054
	4.14675	4.36328	-0.332878	-1.76283	-0.454332	0.472299	-1.13502	1.48142		2	1.02722	0.00245754
	4.49281	4.10471	-0.401863	-1.94641	-0.541231	0.520618	-1.12919	1.43258		2	1.03941	0.00326842
	3.79733	4.64244	-0.116296	-2.1967	-0.773847	0.680394	-1.08727	1.38928		2	1.01243	0.00172085
	4.34862	4.28108	-0.125825	-1.89403	-0.688559	0.601624	-1.26349	1.46371		2	0.997138	0.00117563
	3.8844	4.3948	0.127021	-1.96499	-0.395479	0.37887	-1.18487	1.61719		2	1.02968	0.00260467
	4.1983	3.91433	-0.145474	-1.92288	-0.545023	0.300547	-1.16631	1.5332		2	1.053	0.00444799
	3.89975	4.44727	-0.193252	-2.03252	-0.714855	0.694446	-1.28222	1.26293		2	1.01909	0.0020231
	4.48596	4.16048	-0.222552	-1.85219	-0.542217	0.266924	-1.30418	1.60404		2	1.04195	0.00346453
	3.81322	4.43701	-0.172977	-1.91674	-0.659878	0.433784	-1.23681	1.42296		2	1.02731	0.00246297
	3.62994	3.90427	-0.398194	-1.73379	-0.36444	0.801364	-1.33042	1.43828		2	1.11305	0.0154566
	3.87234	4.3583	-0.086318	-1.90847	-0.374695	0.773277	-1.36986	1.57968		2	1.03991	0.00330591
	3.80465	4.58979	-0.401863	-2.30143	-0.59838	0.714107	-1.09461	1.46667		2	1.04713	0.00389876
	3.88035	4.93626	-0.297625	-1.67029	-0.789873	0.475451	-1.46918	1.49061		2	1.04501	0.00371508
	4.00478	4.62294	-0.1754	-1.70154	-0.535357	0.712662	-1.33844	1.58087		2	1.01606	0.00188008
	4.04311	4.43966	-0.174323	-1.76142	-0.654389	0.536785	-1.1411	1.27006		2	1.00477	0.0014239
	4.36197	4.96532	-0.284488	-1.98791	-0.648177	0.370207	-1.15404	1.48188		2	1.00906	0.00158381
	4.02553	4.50683	-0.0831007	-2.2141	-0.586549	0.35323	-1.39214	1.43427		2	1.03098	0.00268607
	3.9174	4.27279	-0.051448	-1.69094	-0.470394	0.495119	-1.37265	1.42193		2	1.03893	0.00323199
	4.18035	4.09618	-0.12275	-1.66535	-0.984596	0.281818	-1.41167	1.2921		2	1.04426	0.00365248
	3.74524	4.26966	-0.0544622	-1.6749	-0.563032	0.285156	-1.3249	1.20533		2	1.06236	0.00546967
	3.73889	3.97611	-0.284522	-2.30143	-0.925344	0.538296	-1.37706	1.46025		2	1.08417	0.00869426
	3.76554	3.8992	-0.168226	-1.79612	-0.378966	0.774637	-1.45808	1.36529		2	1.09376	0.0105769
	3.96636	4.57317	-0.0910896	-2.18156	-0.468054	0.524923	-1.14902	1.56108		2	1.01708	0.0019275
	4.06475	4.57863	-0.401863	-1.93316	-0.76342	0.830603	-1.28125	1.4282		2	1.01698	0.00192273
	4.13701	4.16394	-0.111898	-2.10728	-0.530109	0.637386	-1.29016	1.41019		2	1.02499	0.00233097
	4.12139	4.87509	-0.401863	-2.09741	-0.620996	0.700363	-1.47297	1.4197		2	1.03933	0.00326192
	3.80209	4.14987	-0.191947	-1.66125	-0.697514	0.340236	-1.29283	1.4914		2	1.05611	0.00476691
	4.38291	4.03652	-0.193012	-1.73717	-0.417563	0.499021	-1.31068	1.45009		2	1.04697	0.00388419
	3.94155	4.96532	0.0524179	-1.9501	-0.430783	0.822954	-1.19906	1.63502		2	1.01275	0.0017345
	3.91732	4.45819	-0.314634	-1.67066	-0.466036	0.678837	-1.12977	1.45988		2	1.031	0.00268713
	4.48213	4.87467	-0.168295	-2.21172	-0.406437	0.787686	-1.31975	1.43839		2	1.01755	0.00194916
	3.62994	4.28384	0.0670211	-2.30143	-0.488395	0.830603	-1.13719	1.18445		2	1.0609	0.00529781
	3.88765	4.28759	0.220472	-2.10921	-0.617051	0.587375	-1.30088	1.42723		2	1.0188	0.00200899
	4.33277	4.07489	-0.401863	-2.1482	-0.714983	0.689418	-1.08727	1.56337		2	1.03425	0.00289969
	3.93647	4.71748	-0.12602	-1.73318	-0.579811	0.686529	-1.29201	1.36556		2	1.01176	0.00169277
	3.63277	4.07796	0.179903	-1.94882	-0.529884	0.614708	-1.32354	1.1966		2	1.06663	0.00600142
	4.26402	4.04054	-0.0216639	-2.05263	-0.726417	0.266924	-1.46918	1.53886		2	1.04765	0.00394499
	4.48252	4.70954	-0.067772	-2.07046	-0.509896	0.61596	-1.34073	1.18078		2	1.00605	0.00147032
	3.62994	4.65359	-0.234044	-1.6987	-0.698606	0.599846	-1.46918	1.19726		2	1.06279	0.00552125
	3.65792	4.46715	-0.285613	-2.03129	-0.36444	0.638826	-1.24058	1.37611		2	1.06459	0.00574143
	3.65636	4.68065	-0.203445	-1.87103	-0.658996	0.478005	-1.3721	1.42272		2	1.04829	0.00400163
	3.62994	4.09778	-0.114075	-2.28711	-0.36444	0.60501	-1.31953	1.34784		2	1.09082	0.00996567
	3.86117	3.91986	-0.246813	-1.69972	-0.518677	0.819572	-1.46918	1.43098		2	1.08254	0.00840657
	4.02885	4.39435	0.220472	-1.66125	-0.420424	0.531401	-1.17987	1.25853		2	1.01398	0.00178728
	3.80618	4.96532	-0.142224	-1.90968	-0.57226	0.647963	-1.33548	1.44284		2	1.03197	0.00274871
	3.75653	3.92401	-0.0753723	-1.693	-0.398869	0.66032	-1.13564	1.40383		2	1.07166	0.00668493
	4.34774	4.38603	-0.401863	-2.24762	-0.446993	0.523002	-1.34499	1.62364		2	1.04852	0.00402316
	3.84199	4.1764	-0.218964	-1.82084	-0.844852	0.539457	-1.17381	1.16775		2	1.03831	0.00318635
	3.67624	4.33257	-0.372279	-1.77026	-0.763034	0.649089	-1.30783	1.32361		2	1.05754	0.00492048
	4.24138	4.62978	-0.397136	-1.75633	-0.727572	0.747563	-1.36127	1.42119		2	1.01562	0.00186003
	4.48596	4.49707	-0.36917	-1.87872	-0.613922	0.677162	-1.2765	1.20111		2	1.01811	0.00197619
	4.48596	3.90427	-0.079154	-1.74688	-0.528937	0.830603	-1.08727	1.2028		2	1.03846	0.00319737
	3.69528	3.92747	-0.401863	-1.97209	-0.538872	0.783989	-1.16083	1.43992		2	1.0875	0.00931282
	4.39476	4.39317	-0.296317	-2.30143	-0.456767	0.634113	-1.13604	1.16775		2	1.03374	0.00286536
	3.88791	4.23453	-0.077978	-1.93358	-0.591245	0.830603	-1.27842	1.46289		2	1.02424	0.00228946
	3.95047	4.22695	-0.185135	-2.1676	-0.431717	0.746959	-1.27788	1.45831		2	1.04273	0.0035274
	4.48596	4.25872	0.0984032	-2.30143	-0.925344	0.43951	-1.24622	1.19645		2	1.01088	0.00165638
	3.84037	4.95616	-0.129001	-1.81864	-0.604392	0.590459	-1.30199	1.5914		2	1.02561	0.00236551
	3.85777	4.59085	-0.017559	-1.92037	-0.616346	0.830603	-1.09747	1.43208		2	0.998699	0.00122295
	3.80754	4.62833	0.206739	-1.898	-0.925344	0.767096	-1.28693	1.29242		2	0.999455	0.00124651
	3.84182	4.16421	-0.146082	-1.67588	-0.608469	0.297423	-1.1991	1.19877		2	1.05619	0.0047752
	3.72007	3.90427	-0.162716	-1.67352	-0.733457	0.549896	-1.08727	1.39279		2	1.06566	0.00587663
	4.02439	4.79013	0.220472	-1.93685	-0.575171	0.370643	-1.27318	1.60758		2	1.00288	0.00135836
	3.8446	4.21447	0.120553	-2.2757	-0.519119	0.574385	-1.31745	1.45019		2	1.04365	0.00360165
	3.84957	4.26048	-0.170922	-1.96621	-0.560508	0.683063	-1.3665	1.65761		2	1.04109	0.00339661
	3.83495	4.39668	0.122723	-1.76111	-0.884732	0.576723	-1.33655	1.47121		2	1.00967	0.00160776
	4.01719	4.50823	-0.0606366	-2.30143	-0.669942	0.561243	-1.19942	1.42941		2	1.00931	0.00159355
	3.65015	4.05182	-0.15997	-1.86012	-0.42456	0.78067	-1.46349	1.67351		2	1.08843	0.00949172
	3.62994	4.40377	0.00640955	-2.15057	-0.595825	0.639199	-1.46918	1.64593		2	1.05837	0.00501173
	3.90641	3.94309	-0.278802	-2.02132	-0.925344	0.640027	-1.13456	1.57912		2	1.04944	0.00410681
	4.28381	4.22403	-0.127856	-1.6725	-0.518376	0.372474	-1.31836	1.61789		2	1.03045	0.00265261
	3.84005	4.96532	-0.226272	-1.66125	-0.472404	0.621967	-1.1358	1.52376		2	1.03399	0.0028822
	4.48596	4.57365	0.220472	-1.86614	-0.610193	0.61075	-1.28823	1.48003		2	0.97347	0.000635867
	3.92172	3.90427	-0.138261	-1.6656	-0.74093	0.374532	-1.24402	1.25527		2	1.06412	0.00568384
	3.9051	4.37423	-0.172238	-2.05568	-0.469891	0.571906	-1.46826	1.53501		2	1.04555	0.00376108
	3.82292	4.44333	-0.0696253	-1.66125	-0.606485	0.588683	-1.46918	1.19627		2	1.04322	0.00356681
	4.00231	4.55829	-0.282906	-2.30143	-0.391663	0.557264	-1.30892	1.23912		2	1.05199	0.00434873
	3.73885	4.3402	-0.343015	-1.74428	-0.925344	0.737842	-1.23339	1.52366		2	1.04024	0.00333104
	3.70704	4.3262	0.112417	-1.71105	-0.538478	0.542076	-1.44474	1.45191		2	1.04836	0.00400869
	3.75402	4.49786	-0.238665	-1.72612	-0.637802	0.660907	-1.14474	1.65145		2	1.02965	0.00260294
	3.73341	3.90427	-0.256686	-1.66125	-0.636892	0.641481	-1.33704	1.23515		2	1.08568	0.00896999
	3.62994	4.25044	-0.0821883	-1.93065	-0.510479	0.67717	-1.14244	1.52407		2	1.04789	0.00396568
	4.35628	4.21171	0.0696971	-1.67136	-0.692772	0.656204	-1.2849	1.48892		2	0.996628	0.00116055
	3.8217	4.75312	-0.143483	-1.84601	-0.463938	0.266924	-1.28547	1.40774		2	1.04589	0.00379045
	4.4784	4.6103	-0.1714	-1.66125	-0.76262	0.266924	-1.16353	1.65145		2	1.00236	0.00134101
	3.76682	4.61006	-0.176348	-1.94277	-0.529035	0.668674	-1.32587	1.28977		2	1.03639	0.0030473
	3.91549	3.95205	-0.146634	-1.92722	-0.615302	0.694041	-1.22452	1.48973		2	1.04723	0.00390709
	3.82805	4.79536	-0.0085997	-1.76751	-0.36444	0.723488	-1.26532	1.65145		2	1.03007	0.0026287
	3.83647	4.4118	0.216739	-1.87344	-0.374865	0.604452	-1.31159	1.60635		2	1.03032	0.00264461
	3.67395	4.49425	-0.0568081	-2.16067	-0.620508	0.751091	-1.21949	1.60933		2	1.03475	0.00293356
	4.06881	3.93224	-0.122533	-1.87683	-0.925344	0.5891	-1.2848	1.4181		2	1.03633	0.00304351
	3.89272	4.49719	0.0179188	-1.88162	-0.36444	0.29591	-1.29691	1.30948		2	1.04242	0.00350218
	4.41082	4.45734	-0.00670016	-2.30143	-0.712814	0.500734	-1.30968	1.43534		2	1.00166	0.00131753
	3.85364	3.91074	-0.0289582	-2.06347	-0.925344	0.266924	-1.14228	1.16775		2	1.06543	0.00584772
	3.79486	4.38176	-0.152903	-1.84901	-0.669204	0.627499	-1.12283	1.48097		2	1.01739	0.00194193
	3.80892	4.77894	-0.0966821	-2.15724	-0.636588	0.538662	-1.32628	1.51171		2	1.02837	0.0025257
	4.41922	4.08399	0.220472	-2.10609	-0.585681	0.650746	-1.20493	1.16352		2	1.01601	0.00187795
	4.48596	4.26906	-0.0984206	-2.25372	-0.615861	0.734447	-1.29572	1.65145		2	1.01473	0.00182028
	4.22757	4.68111	-0.208285	-1.86369	-0.370407	0.720322	-1.16582	1.2379		2	1.0126	0.00172808
	4.36988	4.34929	-0.332393	-1.70322	-0.806113	0.587668	-1.27551	1.5254		2	1.01041	0.00163763
	3.6284	3.95303	-0.282515	-2.19062	-0.464291	0.830603	-1.08727	1.51186		2	1.09071	0.00994188
	4.40856	4.80993	0.149749	-1.94795	-0.367408	0.639943	-1.15619	1.54664		2	0.985699	0.00087684
	4.00966	4.25166	-0.178583	-2.16179	-0.395785	0.765622	-1.1192	1.48333		2	1.03252	0.00278494
	4.37251	4.49655	-0.141249	-1.94522	-0.587919	0.499805	-1.46918	1.46401		2	1.01302	0.00174563
	3.77372	4.25893	-0.195941	-1.88297	-0.665537	0.703958	-1.33429	1.16775		2	1.04702	0.00388862
	4.39205	4.08174	0.0277273	-1.67388	-0.558378	0.683982	-1.15919	1.53978		2	1.01002	0.00162173
	3.73439	4.8509	-0.184091	-2.19456	-0.429254	0.830603	-1.31611	1.46298		2	1.0524	0.00438961
	4.48596	3.94705	0.10332	-2.27692	-0.609639	0.605245	-1.28815	1.50102		2	1.03711	0.00309913
	3.96392	4.66454	-0.155074	-2.13107	-0.641748	0.582696	-1.42459	1.42671		2	1.02281	0.00221277
	3.96868	4.28891	0.220472	-2.30143	-0.586457	0.714511	-1.29094	1.61243		2	1.02273	0.00220815
	3.73131	4.00319	-0.081416	-1.77723	-0.716543	0.632526	-1.35714	1.50361		2	1.05882	0.00506162
	4.26417	3.90427	-0.255382	-1.67145	-0.36444	0.756008	-1.1926	1.66555		2	1.06323	0.00557473
	3.81806	4.07819	-0.366045	-2.04855	-0.842799	0.704535	-1.29164	1.65145		2	1.05966	0.00515564
	3.62994	4.76921	-0.055519	-2.21682	-0.864955	0.55041	-1.08727	1.50887		2	1.02975	0.00260949
	4.21835	4.60151	-0.107645	-2.17574	-0.772349	0.666775	-1.09217	1.74565		2	0.98511	0.000863524
	4.32154	4.96532	-0.127916	-1.68071	-0.393993	0.413759	-1.27686	1.18209		2	1.029	0.00256328
	3.85621	4.44614	-0.154949	-2.29146	-0.803418	0.28802	-1.28251	1.4353		2	1.0429	0.00354115
	3.77085	4.02011	-0.085199	-1.93731	-0.40822	0.312595	-1.27613	1.43519		2	1.07679	0.0074532
	3.94043	4.40664	-0.176875	-2.28963	-0.483728	0.489194	-1.35767	1.16775		2	1.05364	0.00451213
	3.8872	3.92052	-0.0585087	-1.92056	-0.628103	0.701531	-1.2916	1.41975		2	1.05143	0.00429486
	3.73843	4.85751	-0.0782618	-1.8954	-0.773417	0.382992	-1.33425	1.21346		2	1.03818	0.00317677
	3.78815	3.90427	0.220472	-1.9371	-0.813595	0.512766	-1.34123	1.31383		2	1.05743	0.00490791
	4.14803	4.46299	0.0852773	-1.75978	-0.391612	0.648351	-1.13059	1.46001		2	0.996143	0.00114634
	4.10421	4.26553	-0.0806505	-1.84407	-0.608483	0.493421	-1.18096	1.42495		2	1.0052	0.00143943
	4.02444	4.64078	-0.325015	-2.32291	-0.925344	0.55765	-1.29448	1.32599		2	1.02937	0.0025859
	3.6318	4.22077	-0.328587	-1.9146	-0.393625	0.50062	-1.277	1.22204		2	1.0861	0.00904704
	3.97965	3.92528	-0.0755654	-2.10129	-0.922775	0.401891	-1.1289	1.63009		2	1.04481	0.00369833
	4.07725	4.54066	-0.113533	-1.84651	-0.669666	0.60201	-1.32224	1.61413		2	0.999375	0.001244
	3.91179	4.68503	-0.00737926	-2.23013	-0.920479	0.505812	-1.23599	1.16775		2	1.01411	0.00179276
	3.87939	4.29324	-0.148031	-1.66125	-0.492374	0.597347	-1.27906	1.58268		2	1.03646	0.00305266
	4.368	4.09154	-0.0426304	-2.10346	-0.378836	0.626884	-1.12274	1.44439		2	1.02629	0.00240403
	4.42752	4.23796	-0.187342	-1.69213	-0.594172	0.601207	-1.28738	1.65145		2	1.01617	0.00188513
	4.34936	3.91779	-0.107456	-2.30143	-0.562255	0.726396	-1.31868	1.42249		2	1.05295	0.00444354
	3.71684	4.32503	-0.0790392	-2.30143	-0.638953	0.677284	-1.30409	1.64064		2	1.05013	0.00417146
	4.21866	4.30276	-0.0855917	-2.03644	-0.776545	0.792626	-1.3339	1.52242		2	0.998646	0.00122132
	4.48596	4.80627	-0.0809337	-1.84227	-0.484289	0.566941	-1.31723	1.43717		2	0.998166	0.00120661
	3.93648	3.90427	-0.18655	-1.91985	-0.555086	0.477124	-1.29488	1.16775		2	1.07165	0.00668377
	3.93105	4.2629	0.021212	-2.26766	-0.36444	0.463238	-1.28919	1.58128		2	1.04978	0.00413865
	4.29401	4.48348	-0.0898181	-2.22965	-0.626348	0.549698	-1.26464	1.42374		2	1.00071	0.00128658
	4.48596	4.02391	-0.106823	-1.74957	-0.367726	0.452006	-1.18535	1.61319		2	1.04359	0.00359683
	4.15298	4.96532	0.220472	-1.74371	-0.382933	0.761312	-1.30302	1.35707		2	1.00526	0.00144157
	3.79354	3.90427	-0.401863	-1.66125	-0.582136	0.696133	-1.33526	1.42709		2	1.08938	0.00967692
	3.69934	3.90427	-0.172074	-1.82454	-0.422557	0.754564	-1.29462	1.60282		2	1.08629	0.0090832
	4.41772	4.79206	-0.142064	-1.66125	-0.522345	0.619575	-1.40094	1.46357		2	1.00803	0.00154426
	3.96843	3.92538	-0.16087	-2.21019	-0.786286	0.699253	-1.08727	1.20281		2	1.05038	0.00419461
	3.67005	3.95337	0.0262633	-2.30143	-0.55214	0.266924	-1.39221	1.52411		2	1.09926	0.0118081
	3.83053	4.01739	-0.0632613	-1.72285	-0.707794	0.266924	-1.2866	1.43065		2	1.06074	0.00527901
	4.31109	4.6294	0.220472	-1.92314	-0.523106	0.830603	-1.33326	1.47191		2	0.981741	0.000790921
	4.44115	4.57399	-0.205553	-2.26414	-0.484853	0.266924	-1.22528	1.63811		2	1.03028	0.00264213
	3.8524	3.91988	-0.3727	-1.72613	-0.567902	0.649551	-1.08727	1.65145		2	1.0723	0.00677693
	4.48596	3.90427	-0.34497	-2.15873	-0.592677	0.633964	-1.24326	1.65145		2	1.06021	0.00521869
	3.85265	4.32936	-0.148843	-1.94491	-0.492168	0.683758	-1.08727	1.41957		2	1.023	0.00222264
	3.83592	3.96707	-0.0713309	-1.81999	-0.655305	0.78004	-1.23677	1.43614		2	1.04685	0.00387412
	4.40331	4.30817	-0.146202	-2.17185	-0.925344	0.608283	-1.08727	1.24199		2	0.994882	0.00111019
	3.75154	3.92262	-0.184664	-1.74767	-0.793808	0.370228	-1.2509	1.44004		2	1.07185	0.0067122
	4.24486	4.96532	-0.0766198	-1.75713	-0.39693	0.774882	-1.45405	1.35206		2	1.02327	0.00223737
	4.06406	4.12838	-0.146576	-1.66125	-0.36444	0.266924	-1.17109	1.42391		2	1.05601	0.00475627
	4.48596	4.36254	-0.215941	-1.93159	-0.426409	0.736831	-1.34318	1.16775		2	1.02834	0.00252401
	3.62789	3.91388	-0.125982	-1.88097	-0.863569	0.601598	-1.18426	1.17992		2	1.07412	0.00704434
	4.12865	4.94806	-0.148157	-1.92777	-0.811761	0.643467	-1.11511	1.28636		2	0.988083	0.000932639
	3.94076	4.81322	0.148442	-1.88979	-0.674033	0.712602	-1.27582	1.42275		2	0.991354	0.00101453
	4.38705	4.11134	0.0390033	-2.12209	-0.669718	0.330428	-1.46918	1.64754		2	1.03907	0.00324246
	3.77224	3.92548	-0.0816703	-1.84608	-0.593853	0.736157	-1.15919	1.49014		2	1.05636	0.00479355
	3.94194	4.55648	-0.052896	-2.28147	-0.588184	0.546528	-1.30848	1.514		2	1.02256	0.00219918
	3.72316	4.23694	-0.0690398	-2.01738	-0.425015	0.827922	-1.30648	1.37629		2	1.05358	0.0045062
	4.48596	4.19257	-0.160576	-1.76108	-0.66522	0.266924	-1.2498	1.48453		2	1.0259	0.00238168
	3.62994	4.24013	-0.055669	-1.91492	-0.542873	0.830603	-1.28776	1.46326		2	1.05188	0.00433894
	3.78983	4.37052	-0.0288313	-2.15613	-0.672703	0.654297	-1.28169	1.6208		2	1.02745	0.00247115
	4.20002	4.87107	-0.170537	-1.74434	-0.499175	0.771016	-1.29505	1.42846		2	1.00608	0.00147116
	3.87616	3.90427	0.141975	-1.93927	-0.566315	0.528203	-1.45477	1.47428		2	1.06509	0.00580431
	3.93555	3.92548	-0.286551	-2.23779	-0.60017	0.603039	-1.08727	1.60157		2	1.06532	0.00583321
	4.4031	3.92328	-0.138913	-1.67485	-0.839899	0.266924	-1.46918	1.36402		2	1.06202	0.00542917
	3.7497	3.97033	-0.150518	-1.78473	-0.588446	0.651272	-1.28859	1.50083		2	1.06431	0.00570726
	3.70925	4.39497	0.0283374	-1.66125	-0.683535	0.552824	-1.27846	1.46592		2	1.02975	0.00260921
	4.46387	4.75821	-0.130944	-1.88766	-0.638573	0.58671	-1.30585	1.56998		2	0.988876	0.000951907
	4.2669	4.49911	-0.0961423	-2.24903	-0.65725	0.67093	-1.30814	1.26872		2	1.00484	0.00142665
	4.48596	4.6405	-0.309332	-2.09205	-0.36444	0.502614	-1.15003	1.4185		2	1.02193	0.00216663
	3.72726	4.59606	0.0399642	-1.85108	-0.680723	0.677747	-1.29224	1.45185		2	1.01644	0.00189753
	4.25232	4.42073	-0.0515558	-2.1361	-0.789352	0.830603	-1.27844	1.43766		2	0.988386	0.000939971
	3.91376	3.96602	-0.0664847	-1.80189	-0.389983	0.34904	-1.18005	1.16775		2	1.07217	0.00675925
	4.13113	3.91258	-0.0125303	-1.72702	-0.596305	0.678494	-1.32245	1.35525		2	1.04241	0.00350112
	3.79877	4.34876	-0.236338	-1.90128	-0.608595	0.266924	-1.08727	1.41973		2	1.04399	0.0036303
	3.77107	4.24134	0.0239241	-1.88405	-0.457919	0.285767	-1.17397	1.5486		2	1.04964	0.00412531
	3.74959	4.18694	-0.371022	-1.66125	-0.925344	0.677427	-1.1833	1.623		2	1.05214	0.00436334
	3.65918	4.25812	-0.334504	-1.90996	-0.694183	0.650312	-1.27536	1.43596		2	1.05781	0.0049496
	3.85837	4.96532	-0.197633	-2.00928	-0.572537	0.597339	-1.20066	1.55571		2	1.02567	0.0023691
	4.48596	4.16376	-0.282539	-1.82743	-0.68893	0.712199	-1.27613	1.50715		2	1.01875	0.0020069
	4.39651	4.01779	-0.34998	-1.93233	-0.380869	0.809838	-1.19036	1.31998		2	1.05392	0.00454118
	3.64876	4.33832	-0.401863	-2.09536	-0.768708	0.77048	-1.34212	1.5172		2	1.06529	0.00582988
	4.39102	3.90427	-0.370131	-1.66125	-0.59307	0.67267	-1.10898	1.41856		2	1.05194	0.00434434
	3.62994	4.62958	-0.17879	-1.6741	-0.36444	0.266924	-1.13776	1.42063		2	1.06931	0.00635781
	4.42981	4.96532	0.220472	-1.89966	-0.770703	0.347346	-1.10135	1.40748		2	0.972461	0.000619004
	3.67567	4.27899	-0.167614	-2.23807	-0.36444	0.647208	-1.28958	1.43303		2	1.07188	0.00671726
	4.31166	4.35875	-0.15949	-2.09053	-0.36444	0.677068	-1.09531	1.65145		2	1.01433	0.00180279
	3.84836	4.16345	-0.101572	-1.62103	-0.757704	0.750091	-1.30111	1.41613		2	1.03379	0.00286866
	3.75825	4.00614	-0.212248	-1.66926	-0.429083	0.618441	-1.26122	1.16775		2	1.08098	0.00813785
	3.97667	4.27892	-0.209226	-1.7496	-0.44833	0.766598	-1.13418	1.40038		2	1.02618	0.00239764
	3.81318	4.63344	-0.378002	-1.71409	-0.479816	0.452337	-1.08727	1.65145		2	1.04702	0.0038891
	3.92109	4.42948	-0.179172	-1.72767	-0.585746	0.644048	-1.26889	1.65145		2	1.02074	0.00210527
	4.25099	4.07741	-0.289207	-1.8332	-0.755199	0.698065	-1.3121	1.2589		2	1.0323	0.00277033
	3.86389	3.90992	-0.173583	-1.67663	-0.714045	0.642971	-1.109	1.62905		2	1.05364	0.00451285
	3.67654	4.09508	-0.208471	-2.30143	-0.448388	0.556479	-1.43438	1.51103		2	1.09333	0.0104849
	3.8769	4.17954	-0.23788	-1.92133	-0.660599	0.446245	-1.39362	1.59445		2	1.05061	0.00421676
	4.26488	4.04612	0.130886	-2.02316	-0.928596	0.813065	-1.31714	1.61843		2	1.00937	0.00159619
	4.09789	4.04255	-0.350507	-2.0322	-0.593666	0.686595	-1.31639	1.31306		2	1.05218	0.00436725
	4.48596	4.33814	0.00449304	-2.29554	-0.83794	0.695334	-1.24029	1.56506		2	0.993792	0.00107978
	3.75902	4.10613	-0.157687	-2.07964	-0.661555	0.790961	-1.08727	1.34865		2	1.04348	0.0035884
	3.83708	4.43313	-0.12463	-2.23867	-0.708195	0.565985	-1.13832	1.51205		2	1.02152	0.00214541
	4.28796	3.90427	-0.34352	-1.98634	-0.650109	0.584309	-1.08727	1.46843		2	1.04628	0.00382435
	4.44833	4.32683	-0.413138	-1.92799	-0.534161	0.638537	-1.29352	1.6069		2	1.03027	0.00264121
	4.48596	3.84792	-0.314959	-1.71497	-0.707233	0.497355	-1.46918	1.43278		2	1.07174	0.0066966
	3.81259	4.50434	-0.129342	-2.2491	-0.547122	0.685304	-1.2083	1.65145		2	1.03305	0.00281943
	3.983	4.33166	-0.149787	-2.14674	-0.417494	0.560814	-1.31726	1.50282		2	1.03675	0.00307342
	4.38832	4.4732	0.220472	-1.94947	-0.615087	0.649645	-1.16178	1.44742		2	0.967785	0.00054611
	4.34221	4.04359	-0.340128	-2.15153	-0.746507	0.64732	-1.26635	1.33052		2	1.04021	0.00332864
	3.84286	4.19958	-0.248111	-2.29464	-0.584289	0.425257	-1.33123	1.442		2	1.06476	0.00576237
	4.31783	3.91596	-0.164854	-2.18947	-0.36444	0.548624	-1.25658	1.65145		2	1.06472	0.00575815
	4.2479	4.87562	0.101789	-1.90724	-0.481684	0.785554	-1.28308	1.53148		2	0.987626	0.000921697
	3.94449	4.10771	-0.174543	-1.83168	-0.446646	0.266924	-1.43678	1.43166		2	1.07113	0.00661034
	4.24706	3.90427	-0.401863	-1.92241	-0.865282	0.66148	-1.08727	1.31517		2	1.04634	0.00382896
	3.91283	4.62239	0.211291	-1.76489	-0.614391	0.830603	-1.29333	1.19866		2	1.00424	0.00140534
	4.34583	3.92989	-0.111246	-2.2509	-0.860239	0.492993	-1.11863	1.48458		2	1.03364	0.00285855
	4.17377	4.37044	-0.15423	-1.90763	-0.776971	0.673283	-1.29233	1.65145		2	0.997885	0.00119806
	3.79422	4.69157	-0.401863	-1.83023	-0.38536	0.266924	-1.26501	1.42329		2	1.07105	0.00659888
	4.22188	3.90427	-0.181586	-1.75588	-0.404455	0.66198	-1.22403	1.36216		2	1.05521	0.0046725
	4.41011	4.4875	0.0674591	-1.93891	-0.605675	0.266924	-1.08727	1.65145		2	0.992158	0.00103563
	3.93928	4.36423	0.220472	-1.89686	-0.925344	0.455345	-1.27726	1.39996		2	1.00083	0.00129055
	3.84221	4.62767	-0.185531	-1.80246	-0.644229	0.382704	-1.2588	1.45934		2	1.02678	0.00243215
	3.95618	3.9073	-0.22389	-1.87325	-0.733719	0.533426	-1.29146	1.41851		2	1.05638	0.00479559
	3.77427	4.28945	-0.106723	-2.11279	-0.559684	0.783526	-1.25268	1.47407		2	1.03691	0.00308429
	4.11774	4.81624	-0.236506	-2.00119	-0.394562	0.779574	-1.25919	1.4227		2	1.01962	0.00204958
	4.4268	4.41343	-0.319067	-2.10882	-0.887379	0.767442	-1.30739	1.25315		2	1.01116	0.00166782
	4.23937	3.90325	-0.0936229	-1.67284	-0.417131	0.576204	-1.30409	1.42247		2	1.05591	0.00474643
	3.80684	4.08766	-0.117061	-2.26851	-0.643847	0.551097	-1.4452	1.65145		2	1.06918	0.00633926
	3.62994	4.43233	0.0917529	-1.66125	-0.558847	0.69308	-1.16063	1.29381		2	1.03572	0.00300088
	3.93813	4.31961	-0.121334	-1.75171	-0.503716	0.264544	-1.35409	1.60954		2	1.04757	0.00393714
	4.32792	4.50399	-0.0836418	-1.96452	-0.638938	0.521909	-1.17657	1.44104		2	0.983261	0.000822956
	3.81427	4.2772	-0.398523	-2.30143	-0.763741	0.694351	-1.29105	1.18115		2	1.0654	0.00584399
	4.39218	4.93095	-0.28501	-1.67496	-0.49874	0.399713	-1.12368	1.16775		2	1.02467	0.00231314
	4.28013	4.35015	-0.341012	-1.66125	-0.368896	0.706547	-1.16982	1.61863		2	1.03154	0.00272165
	4.09054	4.0561	-0.055519	-1.66125	-0.606003	0.80347	-1.15067	1.26288		2	1.02532	0.00234947
	4.48596	3.90427	0.186603	-2.10543	-0.59414	0.692202	-1.19619	1.42618		2	1.02727	0.00246075
	3.87668	4.00952	-0.0835801	-1.86786	-0.540168	0.620405	-1.12455	1.27214		2	1.04487	0.00370321
	3.84979	4.39754	-0.16105	-2.01738	-0.710289	0.699834	-1.26669	1.37846		2	1.01858	0.00199844
	4.32549	4.34236	-0.0786946	-2.05973	-0.436222	0.80926	-1.29516	1.53967		2	1.01044	0.00163886
	4.00818	4.23006	-0.0642414	-2.18304	-0.925344	0.532942	-1.24256	1.60472		2	1.01631	0.0018916
	4.34259	4.34518	-0.105184	-2.20534	-0.770322	0.830603	-1.29203	1.17778		2	1.0074	0.00152011
	4.26302	4.33505	-0.13581	-1.67518	-0.368168	0.722207	-1.23402	1.38945		2	1.01868	0.00200338
	4.48596	4.01284	-0.176082	-1.77608	-0.504743	0.607353	-1.32014	1.16775		2	1.04697	0.00388397
	3.68671	4.39304	-0.128309	-1.81188	-0.865244	0.830603	-1.19474	1.65145		2	1.02753	0.00247588
	4.10616	4.96532	-0.304322	-1.67139	-0.439515	0.370721	-1.29762	1.38697		2	1.0427	0.00352463
	3.72598	4.30468	-0.122921	-2.11838	-0.37265	0.601851	-1.31807	1.65145		2	1.06169	0.00538963
	3.87084	4.099	-0.179769	-1.87601	-0.773008	0.635627	-1.42521	1.48263		2	1.04577	0.00377986
	3.76458	4.63154	-0.401863	-1.87283	-0.639808	0.526748	-1.2787	1.65145		2	1.04838	0.00400981
	4.48596	4.57779	-0.150914	-1.85192	-0.698107	0.783894	-1.42985	1.60029		2	0.997881	0.00119796
	3.84047	4.20053	-0.389718	-1.81409	-0.534573	0.684664	-1.13203	1.37588		2	1.0506	0.00421606
	4.48596	4.17099	-0.0840289	-1.91773	-0.641586	0.492236	-1.42018	1.27069		2	1.02578	0.00237485
	3.69321	4.26145	-0.248053	-1.77266	-0.504701	0.266924	-1.20759	1.48645		2	1.0693	0.00635579
	4.16725	4.06807	-0.16792	-1.78848	-0.480217	0.626798	-1.47637	1.65145		2	1.05133	0.00428568
	4.15935	3.95195	-0.0945677	-1.94934	-0.925344	0.806894	-1.2517	1.23463		2	1.02979	0.00261164
	4.14865	3.91665	-0.10533	-2.02811	-0.485942	0.680166	-1.11051	1.65145		2	1.04312	0.00355883
	4.41549	4.6088	0.0604101	-1.97232	-0.841829	0.732991	-1.34433	1.65145		2	0.973412	0.000634881
	3.62994	3.91791	-0.0760135	-1.70756	-0.874029	0.595443	-1.36293	1.43586		2	1.07597	0.00732641
	3.69715	4.93697	0.126134	-1.70065	-0.644633	0.636498	-1.2808	1.36287		2	1.02621	0.00239971
	4.06106	3.96862	-0.17221	-1.89419	-0.36444	0.776113	-1.29282	1.42574		2	1.05791	0.00496068
	3.8827	4.4219	-0.144965	-1.92679	-0.908545	0.637397	-1.19558	1.36183		2	1.00581	0.00146148
	4.3536	4.07851	-0.174865	-2.25676	-0.681043	0.755318	-1.19823	1.32491		2	1.02718	0.00245541
	4.43253	4.3226	-0.0883536	-1.94828	-0.533583	0.339196	-1.31211	1.47636		2	1.01705	0.00192573
	3.88587	4.3723	-0.0901993	-1.84086	-0.618632	0.746799	-1.43419	1.51731		2	1.02592	0.00238324
	3.82597	3.93288	0.139464	-2.03539	-0.509479	0.633671	-1.38039	1.33204		2	1.06442	0.00572059
	4.5077	3.90376	-0.0956168	-1.92328	-0.683491	0.619503	-1.11946	1.61251		2	1.02775	0.00248899
	3.80352	4.27562	-0.171293	-1.74021	-0.550724	0.411908	-1.28954	1.38955		2	1.047	0.00388698
	3.94684	4.22792	-0.20304	-1.67601	-0.707443	0.266924	-1.24165	1.49766		2	1.0415	0.00342874
	3.83071	4.34083	-0.07526	-1.80706	-0.663558	0.666515	-1.41665	1.43025		2	1.02887	0.00255559
	3.62994	4.42616	-0.31877	-1.82571	-0.36444	0.690745	-1.27071	1.63109		2	1.07126	0.00662924
	4.19613	4.73239	-0.125464	-2.21643	-0.925344	0.614912	-1.26934	1.63492		2	0.993353	0.00106775
	4.39153	4.01877	0.120813	-2.30143	-0.590484	0.668235	-1.12229	1.38982		2	1.02267	0.00220513
	3.76196	4.65357	0.220472	-1.89426	-0.893911	0.689125	-1.10728	1.65145		2	0.99442	0.00109723
	3.65086	4.41281	-0.0645006	-2.08366	-0.740744	0.626566	-1.29369	1.2835		2	1.03969	0.00328954
	3.71299	4.80455	-0.159414	-1.82154	-0.718332	0.669128	-1.28391	1.51413		2	1.02749	0.00247373
	3.72788	4.70152	-0.166779	-2.29043	-0.543712	0.582446	-1.46918	1.34488		2	1.06116	0.00532764
	3.82907	4.30511	-0.345457	-1.6705	-0.676913	0.266924	-1.46918	1.2527		2	1.07557	0.00726372
	4.21557	4.96532	0.220472	-2.15869	-0.538787	0.830603	-1.22086	1.55626		2	0.987287	0.000913661
	4.36617	4.2979	0.325049	-2.15702	-0.459969	0.354918	-1.08727	1.23557		2	1.01307	0.00174788
	3.94466	4.07831	-0.284636	-1.98088	-0.593832	0.415272	-1.27788	1.56971		2	1.05469	0.00461926
	4.10777	4.2936	-0.156588	-1.82137	-0.599856	0.526272	-1.44642	1.43219		2	1.02549	0.00235894
	3.8131	4.81453	-0.331534	-1.66726	-0.828006	0.679513	-1.33918	1.3424		2	1.03612	0.00302885
	4.2688	4.40287	-0.0787084	-1.91092	-0.377951	0.480707	-1.46918	1.43872		2	1.02986	0.00261603
	3.86543	4.13146	-0.401863	-1.9671	-0.53762	0.484633	-1.10499	1.32256		2	1.05985	0.00517745
	4.05542	4.03463	0.220472	-1.66125	-0.925344	0.266924	-1.29936	1.16775		2	1.04231	0.00349342
	4.48596	4.78904	-0.201129	-2.10729	-0.814462	0.753726	-1.33106	1.35223		2	0.993456	0.00107056
	3.72334	4.36448	-0.0880074	-1.74088	-0.550273	0.705513	-1.21806	1.1939		2	1.03943	0.00326942
	4.19674	4.16151	-0.213027	-1.89902	-0.590201	0.564192	-1.09022	1.42705		2	1.0139	0.0017837
	4.44695	4.15306	-0.124149	-1.94561	-0.925344	0.830603	-1.30983	1.16775		2	1.01331	0.00175839
	4.34623	4.6143	-0.35543	-2.20142	-0.55395	0.478081	-1.22	1.2595		2	1.0254	0.00235403
	4.24458	4.54039	-0.304854	-1.9142	-0.550648	0.654216	-1.2901	1.42891		2	1.00988	0.00161625
	4.13983	4.10837	-0.159461	-1.66125	-0.503575	0.677347	-1.14137	1.60774		2	1.02705	0.00244759
	3.88207	3.91943	-0.342225	-1.9676	-0.603783	0.430444	-1.28888	1.42356		2	1.0773	0.00753362
	4.23835	4.33517	-0.0843388	-1.67566	-0.504805	0.550136	-1.27023	1.44027		2	1.00932	0.00159426
	4.02572	3.91836	-0.178219	-2.30143	-0.515585	0.700163	-1.30215	1.57059		2	1.06853	0.00625188
	4.00897	4.30388	0.138536	-1.93297	-0.527147	0.57245	-1.27762	1.60709		2	1.01003	0.00162229
	3.91152	4.84093	-0.183625	-1.82635	-0.465835	0.667928	-1.21298	1.64279		2	1.02234	0.00218807
	3.60716	4.36183	-0.361233	-2.15569	-0.36444	0.470843	-1.27033	1.33309		2	1.08902	0.00960601
	3.87667	4.52101	0.220472	-1.82535	-0.637	0.521347	-1.27731	1.42302		2	1.00412	0.00140121
	3.74051	4.59823	-0.373569	-2.30143	-0.629179	0.391505	-1.19484	1.49331		2	1.06123	0.00533624
	3.76931	4.28282	0.044782	-1.72643	-0.572096	0.266924	-1.11347	1.45887		2	1.04013	0.003323
	3.97333	4.08579	0.220472	-1.85313	-0.394423	0.663195	-1.28581	1.26798		2	1.03975	0.00329384
	4.29737	4.38448	-0.121602	-1.73461	-0.678155	0.778594	-1.14502	1.65145		2	0.986896	0.000904466
	4.4394	4.76348	-0.058342	-1.99128	-0.418861	0.559305	-1.31607	1.30824		2	1.00535	0.00144466
	4.50547	4.5987	-0.289521	-1.70471	-0.349584	0.683135	-1.32514	1.16775		2	1.03438	0.00290831
	4.21317	4.5822	0.240761	-2.17085	-0.625583	0.291823	-1.28309	1.43024		2	1.00269	0.00135216
	4.31404	4.19305	-0.0978576	-1.66125	-0.768598	0.668948	-1.19584	1.46644		2	0.9987	0.001223
	4.42612	3.92306	-0.100531	-1.94461	-0.676762	0.656751	-1.2854	1.65145		2	1.03391	0.00287688
	3.82146	4.36481	0.220472	-2.30143	-0.36444	0.642382	-1.22419	1.64736		2	1.04381	0.00361521
	3.80867	4.28267	-0.0944414	-1.7924	-0.368958	0.633753	-1.3388	1.65145		2	1.05087	0.00424139
	4.47659	4.59117	-0.344736	-2.30143	-0.494079	0.289634	-1.26553	1.44875		2	1.04235	0.00349676
	3.87662	4.16401	-0.273296	-1.66902	-0.671019	0.830603	-1.28267	1.16775		2	1.0506	0.00421534
	4.44821	4.17775	-0.205823	-2.13086	-0.777949	0.721483	-1.24026	1.42836		2	1.01102	0.00166216
	4.42096	4.26529	-0.393595	-2.09934	-0.778988	0.515458	-1.08727	1.6097		2	1.01805	0.00197297
	4.25813	4.32047	-0.158129	-1.72982	-0.432041	0.74839	-1.08727	1.44019		2	1.00658	0.00148965
	4.48596	4.17243	-0.231435	-1.89133	-0.632358	0.512101	-1.36966	1.16775		2	1.03507	0.0029553
	3.71979	3.98124	-0.161562	-2.25401	-0.381027	0.816084	-1.36318	1.53091		2	1.09188	0.0101812
	3.66152	4.02056	-0.326293	-2.01542	-0.469592	0.62081	-1.29116	1.56112		2	1.08739	0.0092908
	4.41676	4.20699	-0.0750274	-1.68666	-0.598986	0.507409	-1.12083	1.29531		2	1.00661	0.00149065
	3.88437	4.51049	-0.125585	-2.1076	-0.584178	0.694119	-1.29218	1.61924		2	1.02064	0.00210009
	3.82577	4.85899	-0.397056	-2.26197	-0.36444	0.830603	-1.09494	1.64661		2	1.06098	0.00530706
	4.22755	4.02495	-0.176784	-1.75532	-0.541812	0.67753	-1.4475	1.56672		2	1.04632	0.00382751
	3.67005	4.36466	0.220472	-1.76886	-0.483817	0.784491	-1.30627	1.63185		2	1.04009	0.00331963
	4.02413	4.08813	-0.105803	-2.01431	-0.347896	0.747088	-1.13728	1.43551		2	1.04024	0.00333136
	3.91694	4.0257	0.0519527	-1.68589	-0.718221	0.435143	-1.29262	1.4193		2	1.04043	0.00334586
	4.01964	4.96532	-0.275117	-1.70053	-0.902451	0.578197	-1.23353	1.45584		2	1.0113	0.00167358
	4.0486	4.52712	-0.326396	-2.28868	-0.896901	0.740777	-1.08239	1.41519		2	1.01269	0.00173176
	4.48416	3.98895	-0.16628	-1.66125	-0.616866	0.626634	-1.1318	1.52741		2	1.02729	0.00246208
	3.95445	4.4479	-0.184892	-2.04658	-0.691029	0.633909	-1.27774	1.16775		2	1.02042	0.00208919
	3.8952	3.97993	-0.192696	-2.01889	-0.715659	0.663166	-1.16123	1.29022		2	1.04637	0.00383157
	4.07406	4.30173	-0.189073	-2.30143	-0.599547	0.552787	-1.2651	1.21342		2	1.03581	0.00300664
	3.84889	4.96532	-0.164995	-1.67075	-0.439013	0.497498	-1.21726	1.46483		2	1.03828	0.00318379
	3.80721	4.01618	0.0293343	-1.66125	-0.36444	0.591273	-1.43293	1.21022		2	1.07895	0.00780046
	3.76448	4.3389	0.141632	-1.84193	-0.575719	0.58455	-1.46918	1.43357		2	1.03838	0.00319134
	3.75192	4.79335	-0.090316	-1.82535	-0.598321	0.349812	-1.11613	1.16775		2	1.03624	0.00303692
	4.3951	4.27058	-0.0457598	-2.11644	-0.577199	0.830603	-1.28445	1.44638		2	1.00412	0.00140133
	3.75716	4.2074	-0.220402	-2.08269	-0.425835	0.550586	-1.24567	1.44451		2	1.06024	0.00522166
	3.754	3.93329	0.220472	-1.92004	-0.625409	0.578025	-1.46918	1.61647		2	1.06909	0.00632714
	4.37624	4.77316	0.220472	-1.97421	-0.566598	0.58218	-1.25054	1.44862		2	0.973956	0.000644131
	4.16997	4.44579	-0.191836	-1.66125	-0.375339	0.669211	-1.33041	1.56218		2	1.02583	0.00237787
	3.93079	4.07335	-0.264012	-1.7292	-0.381671	0.812074	-1.28898	1.55702		2	1.06182	0.00540498
	4.10015	4.31765	-0.282289	-1.95125	-0.925344	0.6601	-1.34997	1.21408		2	1.02146	0.00214226
	4.37907	4.30564	-0.0931899	-1.88701	-0.846585	0.830603	-1.15419	1.16775		2	0.989961	0.000978878
	4.48596	4.07939	-0.113089	-2.02687	-0.618004	0.468075	-1.18296	1.44524		2	1.02022	0.00207928
	3.98277	4.12361	-0.0147664	-2.2448	-0.56763	0.586551	-1.19103	1.41933		2	1.03277	0.00280114
	3.69885	4.41145	-0.0832604	-2.13022	-0.735759	0.661907	-1.1332	1.4255		2	1.02602	0.00238864
	4.51013	4.47764	-0.20852	-1.92583	-0.598288	0.44252	-1.40544	1.16775		2	1.02411	0.00228226
	3.8763	4.17122	-0.061252	-1.83486	-0.540603	0.652029	-1.31182	1.55731		2	1.03427	0.00290124
	3.67233	4.01853	0.125583	-1.83872	-0.763678	0.619893	-1.12055	1.27629		2	1.04654	0.00384694
	3.7372	3.96348	-0.34416	-1.79904	-0.56825	0.414572	-1.46918	1.31408		2	1.09868	0.0116721
	3.80423	4.54722	0.220472	-1.92287	-0.925344	0.668053	-1.2765	1.30705		2	1.00101	0.00129632
	3.62994	4.14105	-0.336191	-1.8989	-0.925344	0.652985	-1.14259	1.19513		2	1.06444	0.0057234
	3.82848	4.39343	-0.139215	-2.08756	-0.700577	0.467244	-1.2257	1.63025		2	1.0272	0.00245681
	3.76041	4.96181	-0.102469	-1.73109	-0.587691	0.363179	-1.29134	1.49123		2	1.04198	0.00346724
	4.1501	3.96744	0.11023	-2.30143	-0.453139	0.266924	-1.34079	1.62437		2	1.06926	0.0063503
	3.90908	3.92485	-0.143411	-1.8285	-0.501606	0.266924	-1.1652	1.55526		2	1.07044	0.00651278
	3.65622	4.52796	-0.110345	-1.91613	-0.925344	0.667807	-1.2203	1.41719		2	1.02435	0.00229577
	4.43174	4.66115	-0.411722	-1.69348	-0.532963	0.66909	-1.46025	1.42124		2	1.03401	0.00288311
	3.76708	4.26806	-0.0922882	-1.66363	-0.581761	0.591497	-1.13671	1.44265		2	1.03248	0.0027822
	3.81968	4.74191	-0.0332803	-2.30143	-0.622422	0.514149	-1.16728	1.55786		2	1.02473	0.00231664
	4.12662	4.38689	-0.317083	-1.75693	-0.388612	0.739817	-1.2504	1.65145		2	1.03269	0.002796
	4.52292	4.10872	-0.172093	-1.82552	-0.431016	0.689301	-1.26234	1.54135		2	1.03051	0.0026561
	4.35606	3.90427	-0.0839659	-2.30143	-0.525154	0.689551	-1.31876	1.48596		2	1.05518	0.00466998
	3.87386	4.74381	-0.254877	-1.86291	-0.521752	0.552251	-1.08727	1.49563		2	1.02074	0.00210524
	4.3239	3.90427	-0.22975	-2.27461	-0.76058	0.579198	-1.45132	1.63602		2	1.06496	0.00578784
	3.80716	4.23317	-0.102651	-1.92791	-0.36444	0.61669	-1.08727	1.5714		2	1.04209	0.00347566
	4.0224	4.16171	-0.354456	-1.7165	-0.501139	0.675825	-1.3209	1.41649		2	1.04971	0.00413255
	4.41906	4.47699	-0.128954	-2.30018	-0.664732	0.646015	-1.22187	1.65145		2	1.00143	0.00131012
	4.48596	4.27413	-0.11453	-1.66125	-0.439909	0.782303	-1.31701	1.25539		2	1.02336	0.00224213
	4.23998	4.35637	-0.145959	-2.45459	-0.374346	0.489782	-1.13271	1.31548		2	1.04312	0.00355885
	4.42191	4.58435	-0.0562201	-1.67119	-0.73212	0.764825	-1.20884	1.44256		2	0.973779	0.000641116
	4.21085	3.92458	-0.131449	-2.16523	-0.438805	0.67574	-1.31613	1.59449		2	1.05739	0.00490411
	4.36874	4.25496	-0.275176	-2.02889	-0.609348	0.275607	-1.28453	1.59027		2	1.03473	0.00293193
	3.8726	4.32617	-0.0173758	-1.8907	-0.728789	0.799325	-1.18589	1.41428		2	1.00522	0.00143998
	3.656	3.89995	-0.366181	-2.16491	-0.925344	0.266924	-1.07332	1.57795		2	1.09739	0.0113754
	4.19609	4.53617	-0.236756	-2.25319	-0.7958	0.675971	-1.26676	1.16775		2	1.01368	0.00177441
	3.81721	3.90763	-0.0191477	-1.89946	-0.925344	0.622575	-1.46918	1.65145		2	1.06468	0.00575254
	3.88125	4.39054	-0.301939	-1.66965	-0.531452	0.266924	-1.16191	1.42046		2	1.04985	0.0041451
	4.42868	4.63749	-0.401863	-1.80647	-0.36444	0.830603	-1.08727	1.42379		2	1.02099	0.00211835
	3.80887	4.40898	-0.181419	-1.88286	-0.636404	0.830603	-1.1544	1.51285		2	1.01931	0.00203393
	4.13855	4.74428	-0.208734	-2.00902	-0.925344	0.585586	-1.31748	1.61331		2	0.998115	0.00120506
	3.7332	4.26885	-0.348598	-2.0475	-0.711635	0.301105	-1.26322	1.16775		2	1.072	0.00673345
	3.89725	4.96532	-0.156702	-1.86023	-0.5223	0.483359	-1.37301	1.63626		2	1.03651	0.00305626
	3.85751	4.19848	-0.220938	-2.14445	-0.579412	0.415491	-1.31954	1.42905		2	1.05426	0.00457554
	4.4517	4.67103	-0.071863	-2.26966	-0.560318	0.643482	-1.22544	1.64691		2	0.996713	0.00116304
	3.87257	4.88826	-0.197812	-2.18567	-0.865784	0.473757	-1.28215	1.46326		2	1.02596	0.00238548
	4.0238	3.90427	-0.198155	-1.76128	-0.611945	0.744191	-1.08727	1.62769		2	1.04604	0.00380341
	3.70652	4.45756	-0.258977	-1.66125	-0.398908	0.765242	-1.28265	1.35167		2	1.05852	0.00502773
	4.17993	4.96532	-0.302706	-1.67677	-0.563636	0.632586	-1.22526	1.20835		2	1.02224	0.00218267
	3.92477	3.91677	-0.166197	-2.04375	-0.511346	0.721307	-1.16585	1.65818		2	1.05884	0.00506348
	4.0425	4.01374	-0.345707	-1.67912	-0.596836	0.595819	-1.32285	1.4122		2	1.05786	0.00495539
	3.82345	4.30573	-0.132868	-1.81288	-0.696319	0.629968	-1.17789	1.61923		2	1.0205	0.00209336
	4.45421	3.90427	0.177387	-1.90633	-0.599795	0.370713	-1.28696	1.19809		2	1.04452	0.00367402
	4.3717	4.15549	-0.0991348	-2.28812	-0.719678	0.815198	-1.08727	1.21192		2	1.01525	0.00184365
	4.48596	4.96532	-0.0675737	-1.82498	-0.925344	0.266924	-1.29374	1.37769		2	1.00054	0.00128107
	4.00341	4.07348	-0.245506	-2.05593	-0.366121	0.414953	-1.28032	1.30519		2	1.06674	0.00601561
	3.9606	4.58357	-0.286294	-2.22152	-0.562253	0.497767	-1.4037	1.17853		2	1.04947	0.00410956
	4.36359	4.41316	-0.224538	-1.66125	-0.87017	0.830603	-1.44519	1.38429		2	1.01037	0.00163608
	4.3988	4.21103	-0.0948482	-1.74422	-0.467038	0.665108	-1.24106	1.65145		2	1.01513	0.00183793

## Sheet: Vin
	Simulated Signatures														correction prediction:
shRNA's:	p53	Chk2	ATR	Chk1	ATX	DNAPKcs	Bok	Bim		class	LR	p-value			5 = Spindle Poison
	1.97131	0.687083	0.162392	-0.724124	-2.24935	-0.573582	-2.95842	0.473421		5	1.04017	0.0351082
	1.36381	0.365067	0.253116	-1.29717	-1.75797	-0.334787	-1.76737	0.351095		5	0.966585	0.0089832
	1.18333	0.752755	0.424423	-0.901556	-2.18662	-0.164959	-3.16015	0.631297		5	1.01696	0.0235238			98.3% correct classification
	0.897343	0.7716	0.442631	-1.03111	-1.77846	-0.375774	-3.25377	0.201835		5	1.00086	0.0175409
	1.7569	0.488184	0.383532	-1.18354	-2.03904	-0.592461	-2.49674	0.457736		5	0.998573	0.0168051
	1.6382	0.793386	0.296518	-1.13475	-1.95782	-0.547677	-3.21628	0.451701		5	1.02594	0.0275552
	2.21973	0.509052	0.406042	-0.899101	-1.55253	-0.604733	-2.3935	0.482982		5	0.986844	0.0134385
	1.58586	0.617492	0.478687	-0.845821	-2.13699	-0.596483	-3.07327	0.431114		5	1.02153	0.0255089					Experimental Data
	0.627569	0.757642	0.379209	-0.288217	-1.45778	-0.561791	-2.63244	0.501166		5	0.97069	0.00976366				shRNA's:	p53	Chk2	ATR	Chk1	ATX	DNAPKcs	Bok	Bim
	1.63675	0.595516	0.44775	-0.951211	-1.44436	-0.161642	-1.76737	0.201835		5	0.941107	0.00525266			Replicates	1	1.75702	0.533048	0.778984	-1.07191	-1.44436	-0.433419	-3.21791	0.453415
	0.856052	0.520507	0.778984	-0.847724	-1.76981	-0.586979	-3.0334	0.569218		5	1.00113	0.0176268				2	1.0376	0.677322	0.498186	-0.82375	-2.06115	-0.57328	-3.05433	0.201835
	0.846183	0.660325	0.508062	-1.09022	-1.61107	-0.521252	-1.79581	0.480457		5	0.976506	0.0109708				3	2.25712	0.38255	0.412599	-1.29717	-2.00148	-0.0477454	-2.92866	0.453415
	0.627569	0.530118	0.162392	-0.86232	-1.58434	-0.525168	-3.06081	0.605384		5	0.980891	0.0119647				4	2.00495	0.308308	0.400169	-1.21341	-2.44931	-0.576157	-3.20354	0.434727
	2.09716	0.612559	0.608189	-0.950067	-2.04752	-0.0764131	-3.18216	0.499824		5	1.03685	0.0332085				5	1.62219	0.793386	0.162392	-0.859861	-1.56124	-0.302064	-3.06285	0.63212
	1.36975	0.562836	0.686367	-1.29717	-2.08879	-0.431887	-3.04753	0.569642		5	1.02643	0.0277907				6	0.627569	0.792761	0.619334	-0.866844	-1.58904	-0.367347	-2.22571	0.512078
	0.945115	0.564472	0.447003	-1.14638	-1.78628	-0.300524	-1.76737	0.555181		5	0.973486	0.0103287				7	1.31125	0.630955	0.447905	-0.288217	-1.46765	-0.604733	-1.76737	0.486316
	0.627569	0.792873	0.480144	-0.631732	-1.44436	-0.587897	-3.08012	0.475188		5	0.99034	0.014375
	1.05369	0.409895	0.796505	-0.881634	-2.10283	-0.435335	-2.88208	0.447164		5	1.00393	0.0185687
	1.63229	0.580443	0.445834	-0.810685	-1.52595	-0.5223	-3.13575	0.493211		5	0.975673	0.0107902
	1.7652	0.793386	0.4402	-1.29717	-1.44436	-0.434842	-2.42699	0.562121		5	0.966317	0.00893424
	1.11871	0.528687	0.410019	-0.826294	-2.13678	-0.190965	-2.10806	0.460749		5	0.968404	0.00932211
	1.85993	0.317049	0.162392	-0.84091	-2.33468	-0.352161	-3.13082	0.451192		5	1.03748	0.0335605
	1.23793	0.767257	0.547136	-0.782833	-1.53842	-0.595777	-3.21204	0.41753		5	0.988409	0.0138511
	1.84582	0.678443	0.582084	-0.831267	-1.44436	-0.0859545	-3.11543	0.201835		5	0.97015	0.00965785
	1.38985	0.822188	0.181817	-1.09469	-1.44436	-0.555494	-3.20297	0.201835		5	0.986148	0.0132585
	0.627569	0.503633	0.723162	-0.820352	-2.44931	-0.504832	-3.21632	0.63212		5	1.07945	0.0650264
	1.36736	0.460577	0.700252	-0.860896	-1.44436	-0.433917	-3.20865	0.610119		5	0.977741	0.0112432
	0.627569	0.717813	0.720853	-0.982989	-1.89032	-0.416676	-2.86572	0.201835		5	1.00352	0.0184291
	0.627569	0.609047	0.426065	-0.699887	-1.52198	-0.508042	-2.07581	0.448092		5	0.955305	0.00711308
	2.25712	0.775677	0.162392	-1.24836	-2.09837	-0.398768	-3.10802	0.458421		5	1.0638	0.0513319
	1.2073	0.532338	0.418121	-1.19114	-2.14945	-0.416824	-3.07556	0.484443		5	1.01415	0.022371
	0.960612	0.476673	0.162392	-1.29717	-1.81758	-0.487183	-2.53355	0.494922		5	0.965787	0.00883808
	2.25712	0.561158	0.668051	-0.948639	-2.44931	-0.0477454	-2.90429	0.435098		5	1.07376	0.0597512
	1.52364	0.766438	0.436417	-0.288217	-2.34706	-0.0477454	-3.0872	0.458499		5	1.03607	0.0327759
	1.33689	0.661361	0.778984	-0.288217	-1.99228	-0.299589	-2.38231	0.45955		5	0.984058	0.0127302
	1.36817	0.793123	0.501723	-1.17764	-2.21381	-0.0477454	-3.00884	0.486048		5	1.0178	0.0238815
	0.919933	0.308308	0.480668	-1.07827	-1.46502	-0.592694	-3.21654	0.632071		5	0.990422	0.0143977
	2.11231	0.677755	0.549718	-0.835321	-1.55443	-0.212381	-2.02751	0.466617		5	0.968336	0.00930929
	1.85861	0.786987	0.778984	-0.288217	-1.44436	-0.57951	-2.03175	0.444143		5	0.988223	0.0138015
	1.4709	0.455201	0.687818	-0.551798	-1.43265	-0.0477454	-2.06963	0.458811		5	0.920884	0.00334929
	1.81748	0.684678	0.607427	-0.588283	-2.02408	-0.501789	-3.20638	0.462201		5	1.03235	0.0307684
	1.36314	0.565879	0.438764	-0.769945	-2.44931	-0.355933	-3.21791	0.503586		5	1.04736	0.0395247
	0.905535	0.731271	0.234976	-0.86336	-1.46561	-0.587928	-3.04212	0.452042		5	0.968185	0.00928072
	2.25712	0.715705	0.467121	-0.976565	-2.44931	-0.420606	-3.13268	0.438829		5	1.09319	0.0792492
	1.31128	0.573663	0.419112	-0.838486	-1.46735	-0.104646	-3.11343	0.482488		5	0.942799	0.00544901
	0.900243	0.698712	0.520718	-0.860816	-2.20161	-0.177352	-2.8159	0.439023		5	0.997615	0.0165056
	0.627569	0.308308	0.424988	-1.26809	-1.44436	-0.598087	-2.97361	0.215984		5	0.987368	0.0135755
	1.54114	0.739332	0.456247	-1.2465	-2.44931	-0.0494824	-3.01237	0.562511		5	1.0495	0.0409208
	1.37937	0.308308	0.598286	-0.938396	-2.16025	-0.379037	-3.2032	0.45599		5	1.01971	0.0247034
	1.77521	0.540675	0.478272	-0.890249	-1.45296	-0.575585	-1.93425	0.388764		5	0.957031	0.00737489
	1.09116	0.793386	0.564094	-1.16718	-2.43548	-0.579189	-3.07471	0.446938		5	1.06494	0.0522457
	0.627569	0.762815	0.405455	-0.77424	-1.78675	-0.0477454	-3.13434	0.461398		5	0.987205	0.0135327
	1.28725	0.681944	0.455819	-1.29717	-2.1775	-0.407382	-2.89181	0.63212		5	1.0196	0.0246538
	0.574016	0.522313	0.40327	-0.902945	-1.46551	-0.281413	-1.76737	0.429002		5	0.960615	0.00794569
	2.26605	0.579677	0.612184	-1.13585	-1.52295	-0.0507059	-1.98569	0.586229		5	0.988209	0.0137979
	2.08869	0.793386	0.495476	-1.1539	-2.14943	-0.365913	-3.08347	0.458373		5	1.05411	0.0440745
	0.627569	0.701899	0.418699	-0.972729	-1.49953	-0.604733	-3.20519	0.325744		5	1.00048	0.0174156
	1.85258	0.705449	0.545749	-0.843903	-1.53042	-0.554198	-2.50927	0.30149		5	0.963416	0.00841864
	2.12355	0.59766	0.178209	-1.29717	-2.44931	-0.604733	-2.26666	0.407331		5	1.06888	0.0555044
	1.12735	0.765228	0.769284	-0.759522	-2.11112	-0.604733	-1.76737	0.479728		5	1.02317	0.0262527
	0.656501	0.413778	0.45655	-0.88819	-1.50596	-0.305489	-1.91948	0.529194		5	0.949323	0.0062681
	2.08283	0.555645	0.778984	-1.3237	-1.53162	-0.594804	-2.07826	0.473568		5	1.01137	0.0212773
	2.06754	0.533287	0.778984	-0.827193	-1.9688	-0.313885	-3.2055	0.239631		5	1.0395	0.0347136
	1.7661	0.497768	0.468692	-0.848606	-2.43285	-0.26482	-3.00565	0.286815		5	1.03917	0.0345225
	2.00345	0.494099	0.546032	-0.831331	-2.18205	-0.283859	-2.26157	0.461544		5	1.0067	0.0195395
	1.43589	0.504935	0.400746	-1.12515	-2.18141	-0.566564	-2.0816	0.306604		5	0.9989	0.0169087
	2.36818	0.683093	0.675783	-1.26486	-1.72794	-0.397444	-3.21791	0.600067		5	1.06453	0.0519164
	1.73736	0.601536	0.718228	-0.947472	-2.0282	-0.604733	-3.21599	0.507132		5	1.04064	0.0353835
	0.627569	0.558901	0.681066	-1.29717	-2.04155	-0.436945	-3.16019	0.302855		5	1.04187	0.036113
	1.75231	0.793386	0.24557	-0.90691	-2.00948	-0.277893	-1.99125	0.483698		5	0.983331	0.012551
	2.04392	0.494544	0.434908	-1.26176	-2.89013	-0.288178	-3.21054	0.584201		5	1.13701	0.140253
	1.54293	0.526153	0.640785	-1.29717	-1.45096	-0.321451	-3.13746	0.459526		5	0.982845	0.0124323
	2.0574	0.456392	0.483209	-0.897326	-1.64979	-0.554912	-2.95498	0.201835		5	0.99728	0.0164018
	1.6434	0.580786	0.333166	-0.692169	-2.23779	-0.35663	-3.07541	0.451541		5	1.01707	0.0235704
	0.627569	0.713681	0.778984	-1.28712	-2.44931	-0.604733	-3.00664	0.353		5	1.08868	0.0743427
	0.627569	0.793386	0.671288	-1.20203	-2.18728	-0.586155	-2.57233	0.527885		5	1.03965	0.0348042
	1.36281	0.445511	0.548093	-0.795929	-2.18483	-0.0477454	-1.76737	0.604562		5	0.992809	0.01507
	1.95835	0.395414	0.416857	-0.952159	-1.45964	-0.439473	-2.67144	0.481346		5	0.955099	0.00708243
	2.03953	0.75591	0.409238	-0.377001	-1.55132	-0.503358	-3.03431	0.629332		5	1.004	0.0185911
	0.884666	0.462752	0.778984	-0.986651	-2.24975	-0.328765	-2.52016	0.467961		5	1.00872	0.0202754
	2.08053	0.733516	0.207902	-1.29717	-2.34659	-0.240013	-2.64183	0.472584		5	1.04847	0.0402431
	1.14983	0.736714	0.226295	-1.16318	-1.46907	-0.520935	-3.14752	0.459826		5	0.977885	0.0112754
	1.87954	0.79287	0.657716	-1.29717	-1.53077	-0.528097	-2.97831	0.44842		5	1.00975	0.0206599
	1.39942	0.559216	0.590908	-0.969445	-2.30678	-0.604733	-2.06976	0.201835		5	1.01833	0.0241073
	1.39568	0.471525	0.419854	-0.733296	-1.71096	-0.357696	-3.04156	0.586859		5	0.961365	0.00807011
	0.627569	0.481164	0.50767	-0.85778	-1.50059	-0.594128	-3.20839	0.63212		5	1.00014	0.0173049
	1.80298	0.308308	0.778984	-1.13386	-1.46488	-0.442065	-3.13906	0.517969		5	0.998176	0.0166804
	1.48053	0.793386	0.162392	-0.531365	-2.17527	-0.183583	-2.99696	0.455625		5	1.00211	0.0179517
	1.3359	0.617407	0.238963	-1.29717	-1.67315	-0.47901	-3.21264	0.63212		5	0.998924	0.0169162
	1.24915	0.501345	0.485453	-0.830644	-1.44904	-0.356012	-2.65498	0.457557		5	0.920825	0.00334478
	2.00331	0.624213	0.707558	-0.825679	-1.4721	-0.0477454	-3.12	0.61119		5	0.987716	0.013667
	1.77325	0.342141	0.540462	-0.288217	-2.10533	-0.124301	-2.9571	0.460372		5	1.00575	0.0192014
	0.627569	0.793386	0.485334	-1.1224	-1.5326	-0.503343	-2.29672	0.472793		5	0.970978	0.00982074
	1.70417	0.609685	0.778984	-0.855524	-2.44931	-0.278696	-3.20719	0.435474		5	1.06776	0.0545602
	2.25712	0.662119	0.408191	-1.2281	-1.49202	-0.583772	-2.08757	0.456012		5	1.00469	0.0188324
	1.82629	0.649376	0.438524	-1.04618	-1.92393	-0.0477454	-2.33158	0.589297		5	0.970564	0.00973893
	1.82188	0.771429	0.408626	-0.94503	-1.99495	-0.445755	-3.20846	0.389462		5	1.02605	0.0276081
	1.83885	0.731938	0.162392	-1.1273	-2.44931	-0.478574	-2.99807	0.30613		5	1.06062	0.0488498
	1.96748	0.374056	0.162392	-0.753471	-2.44931	-0.518192	-3.21791	0.446927		5	1.0693	0.0558581
	1.95202	0.74101	0.505521	-0.767527	-1.92813	-0.442404	-3.17796	0.487832		5	1.02511	0.027161
	2.12085	0.613552	0.356381	-1.24858	-1.45967	-0.107613	-3.20487	0.201835		5	1.00532	0.0190521
	1.71278	0.613273	0.477607	-1.14681	-1.50195	-0.604733	-1.89747	0.548643		5	0.973388	0.0103085
	0.98578	0.637821	0.162392	-1.04087	-1.44436	-0.604733	-3.17154	0.491198		5	0.978918	0.0115083
	1.79414	0.308308	0.162392	-1.09216	-2.34122	-0.390719	-1.7261	0.484623		5	1.02891	0.0290073
	0.957285	0.490108	0.163451	-1.27102	-1.88335	-0.511543	-3.10475	0.506046		5	1.00036	0.0173783
	1.81238	0.359601	0.436618	-1.02017	-1.47137	-0.436314	-3.09181	0.534132		5	0.975284	0.0107068
	1.98442	0.674383	0.657118	-0.833936	-2.44931	-0.11407	-3.15696	0.562314		5	1.07202	0.0582041
	1.18563	0.455883	0.306505	-1.06335	-1.65491	-0.392845	-2.98634	0.481164		5	0.955378	0.00712402
	0.627569	0.793386	0.457623	-1.18642	-1.7912	-0.268021	-1.98377	0.384157		5	0.984427	0.0128222
	2.1205	0.820417	0.594549	-0.664617	-1.6705	-0.516846	-2.77318	0.564904		5	1.0051	0.0189725
	1.74895	0.414611	0.377417	-0.830516	-1.51002	-0.525134	-3.21082	0.380106		5	0.982004	0.0122291
	1.7192	0.37919	0.599996	-0.288217	-1.96304	-0.60153	-2.20973	0.609788		5	0.994966	0.0157002
	2.06737	0.427538	0.778984	-0.916096	-1.96595	-0.592821	-2.16055	0.441992		5	1.01817	0.024037
	1.31131	0.42732	0.778984	-0.840749	-1.44436	-0.49794	-2.76929	0.440057		5	0.949438	0.00628342
	1.68781	0.742994	0.440596	-0.304837	-2.44931	-0.0947658	-3.18394	0.437738		5	1.0589	0.0475474
	1.21469	0.369579	0.278207	-1.1237	-1.97766	-0.409273	-3.16765	0.617329		5	0.999712	0.0171677
	0.613067	0.349263	0.406565	-0.84681	-1.71573	-0.0477454	-1.90053	0.201835		5	0.953941	0.00691201
	0.933999	0.657956	0.413966	-1.06969	-1.59223	-0.595215	-1.75985	0.451952		5	0.974885	0.0106219
	0.778198	0.793386	0.162392	-1.0588	-1.58495	-0.106393	-3.20117	0.441824		5	0.976182	0.0109004
	1.08861	0.779908	0.489251	-1.06084	-1.55792	-0.580828	-3.08598	0.52708		5	0.985474	0.013086
	0.976218	0.68265	0.265832	-0.943855	-1.58122	-0.226824	-2.34595	0.478111		5	0.923315	0.00353941
	0.860163	0.621136	0.731643	-0.43875	-1.97456	-0.552099	-2.65958	0.201835		5	0.995401	0.0158302
	0.864912	0.66403	0.66117	-1.16649	-1.60335	-0.574569	-1.86506	0.449921		5	0.984951	0.0129537
	1.21022	0.793386	0.410628	-0.884732	-2.04712	-0.251032	-3.05844	0.63212		5	0.998472	0.0167733
	1.05071	0.390449	0.626613	-0.288217	-1.8341	-0.580126	-3.15944	0.63212		5	1.00899	0.0203767
	2.09428	0.573706	0.483416	-1.27645	-2.04726	-0.585664	-3.21208	0.434323		5	1.0629	0.0506234
	1.21549	0.345564	0.475072	-0.784456	-2.44931	-0.310991	-3.21791	0.201835		5	1.04246	0.0364658
	1.59436	0.674886	0.521148	-0.828646	-1.55085	-0.514507	-3.14539	0.430242		5	0.980537	0.0118818
	1.94427	0.741908	0.162392	-1.02929	-1.8035	-0.0477454	-2.13686	0.48428		5	0.965886	0.00885598
	0.74958	0.338375	0.278106	-1.0489	-2.44931	-0.0810208	-2.84504	0.488924		5	1.0237	0.0264982
	1.30345	0.570731	0.452336	-1.20084	-1.48678	-0.295343	-3.0554	0.367909		5	0.958381	0.0075855
	1.69065	0.406756	0.364594	-0.861243	-1.53531	-0.309913	-2.20159	0.615402		5	0.92883	0.00400723
	2.14287	0.68159	0.364942	-0.926264	-1.47203	-0.260326	-2.69467	0.351079		5	0.966473	0.00896268
	0.955885	0.345052	0.164541	-0.547987	-2.018	-0.52201	-1.76737	0.480543		5	0.980496	0.0118722
	1.5359	0.349494	0.376047	-0.85151	-1.95205	-0.581244	-3.0842	0.201835		5	0.996048	0.0160252
	1.33759	0.663804	0.576821	-0.356094	-1.48685	-0.0749191	-2.52587	0.448727		5	0.924104	0.00360319
	2.25712	0.354336	0.613108	-1.23078	-2.29641	-0.562921	-3.21791	0.456434		5	1.09587	0.0822818
	2.01259	0.426367	0.409634	-1.21183	-1.62265	-0.504411	-3.17116	0.44873		5	1.01288	0.0218656
	1.84005	0.360068	0.413923	-1.29717	-1.48458	-0.408264	-2.73619	0.201835		5	0.966796	0.00902207
	2.01994	0.723125	0.178986	-1.11654	-1.93132	-0.604733	-3.01934	0.201835		5	1.02969	0.0294003
	1.50195	0.710351	0.365832	-1.27416	-1.55946	-0.291768	-1.76737	0.545872		5	0.965808	0.00884181
	2.07917	0.793386	0.255776	-0.67119	-1.52151	-0.583327	-1.96402	0.50567		5	0.983618	0.0126215
	0.627569	0.322318	0.418064	-0.879812	-1.36103	-0.494484	-3.21326	0.461717		5	0.981906	0.0122057
	1.3502	0.409504	0.427847	-1.04288	-2.44931	-0.575085	-2.93953	0.265525		5	1.03881	0.0343187
	1.82819	0.368369	0.778984	-0.37084	-1.73233	-0.602224	-3.21236	0.461602		5	1.02378	0.0265346
	2.03729	0.793386	0.778984	-0.83439	-1.65061	-0.401426	-3.21791	0.44934		5	1.02671	0.0279246
	1.73047	0.557274	0.458531	-1.02448	-2.44058	-0.5967	-1.76737	0.617438		5	1.05362	0.0437321
	1.26785	0.583544	0.442203	-1.10367	-2.44931	-0.328799	-3.15858	0.480971		5	1.04811	0.0400072
	1.18305	0.792979	0.352464	-0.346699	-2.1144	-0.412524	-2.16836	0.464546		5	0.987623	0.0136425
	1.70632	0.826244	0.3143	-0.75605	-2.44931	-0.227714	-3.19991	0.349163		5	1.05665	0.0458938
	1.56022	0.738016	0.162392	-1.21709	-1.69993	-0.603078	-2.83062	0.63212		5	0.985792	0.0131672
	2.06435	0.438837	0.778984	-1.00119	-2.25408	-0.604733	-3.20557	0.437389		5	1.07912	0.0647124
	0.926794	0.562909	0.442099	-1.26203	-2.15954	-0.135603	-1.76737	0.250567		5	1.00618	0.0193542
	1.40735	0.398679	0.162392	-1.0257	-2.09309	-0.424222	-2.92424	0.497917		5	0.987698	0.0136622
	1.06316	0.793386	0.374335	-1.29717	-2.44931	-0.578136	-2.23385	0.47335		5	1.04476	0.0378743
	2.25712	0.730294	0.45299	-0.785731	-1.44436	-0.400922	-2.96844	0.468095		5	0.999056	0.0169581
	1.83608	0.68045	0.608795	-0.824919	-1.6301	-0.372071	-3.01649	0.41893		5	0.982178	0.0122709
	1.61612	0.581171	0.626793	-0.832508	-1.53556	-0.488128	-3.06249	0.446071		5	0.973777	0.0103891
	0.627569	0.733757	0.485043	-0.958111	-1.65651	-0.302423	-2.80937	0.201835		5	0.966414	0.00895192
	1.89221	0.610169	0.506476	-0.832042	-1.59644	-0.39583	-3.1327	0.477845		5	0.988244	0.013807
	1.5023	0.581107	0.352067	-1.33999	-1.42384	-0.384178	-3.20592	0.201835		5	0.984214	0.0127692
	1.26828	0.47428	0.426995	-0.857301	-2.21165	-0.254647	-2.78622	0.532975		5	0.986623	0.0133811
	1.96016	0.60738	0.558505	-0.707645	-2.44931	-0.411658	-3.20275	0.491562		5	1.07432	0.0602572
	1.73605	0.793386	0.496061	-0.897822	-1.78274	-0.483559	-2.50487	0.453515		5	0.972493	0.010125
	1.6897	0.308308	0.435754	-1.01042	-1.64811	-0.35239	-3.01459	0.620628		5	0.96999	0.00962668
	1.91495	0.738796	0.404972	-0.827301	-2.20185	-0.591439	-2.6319	0.53757		5	1.02526	0.027232
	2.10372	0.820346	0.162392	-0.940978	-1.46013	-0.604733	-3.21476	0.414571		5	1.0198	0.0247416
	2.25712	0.832984	0.778984	-1.07233	-1.63735	-0.0477454	-2.18394	0.441821		5	1.0034	0.0183886
	0.968643	0.748342	0.447249	-0.888855	-1.65104	-0.397095	-2.80819	0.472526		5	0.954078	0.00693193
	2.07173	0.550569	0.162392	-0.859247	-1.92008	-0.213051	-2.16685	0.668145		5	0.982107	0.0122539
	1.70765	0.504728	0.706989	-0.437467	-1.52489	-0.604733	-3.10011	0.232717		5	0.992664	0.0150283
	1.2118	0.342562	0.400216	-0.966098	-1.65205	-0.549597	-2.22316	0.458143		5	0.938542	0.00496715
	1.56225	0.700317	0.393434	-0.323423	-2.32001	-0.586176	-3.00161	0.269953		5	1.04069	0.0354111
	2.08845	0.792782	0.259139	-1.2289	-1.73399	-0.380904	-3.10751	0.547758		5	1.02308	0.0262118
	0.879616	0.687885	0.290659	-0.98898	-2.08834	-0.600944	-2.74953	0.610498		5	1.00174	0.0178304
	0.627569	0.684184	0.446086	-1.29717	-2.08098	-0.573782	-3.21791	0.365933		5	1.05103	0.0419449
	0.785651	0.673902	0.532878	-1.14303	-1.61935	-0.350715	-2.99662	0.592351		5	0.980198	0.0118026
	1.86786	0.386966	0.778984	-1.062	-1.95591	-0.574318	-3.08512	0.444389		5	1.03207	0.0306226
	1.77701	0.57537	0.566217	-0.783417	-1.44195	-0.194401	-3.14258	0.583558		5	0.96834	0.00930997
	0.627569	0.793005	0.778984	-0.902681	-1.98677	-0.0477454	-2.1829	0.506703		5	0.996894	0.0162829
	0.627569	0.72309	0.604036	-1.29717	-1.52035	-0.497077	-1.76737	0.310016		5	0.999867	0.0172174
	2.25712	0.793386	0.564539	-0.288217	-1.44436	-0.177868	-2.93552	0.346226		5	1.00217	0.0179718
	1.2636	0.721535	0.369406	-0.922268	-1.9813	-0.604733	-3.04001	0.239202		5	1.00083	0.01753
	2.25712	0.647434	0.498164	-0.35985	-2.02666	-0.582182	-2.45848	0.486848		5	1.03338	0.0313133
	2.1528	0.90636	0.65275	-0.92381	-1.92518	-0.38261	-2.72863	0.449758		5	1.02549	0.0273393
	2.24633	0.44985	0.778984	-0.941624	-1.966	-0.604733	-3.20415	0.573913		5	1.06806	0.0548068
	1.99744	0.560102	0.510288	-1.2402	-1.44436	-0.0477454	-2.26148	0.449335		5	0.953331	0.00682378
	1.79956	0.792774	0.431316	-1.09726	-2.21539	-0.456864	-2.03033	0.474596		5	1.02204	0.0257404
	1.50013	0.792782	0.573664	-0.638881	-1.46575	-0.517566	-1.97269	0.263465		5	0.952708	0.00673467
	2.25712	0.793386	0.422837	-0.998762	-1.59523	-0.138754	-2.57022	0.378907		5	0.984254	0.012779
	1.71951	0.682122	0.619394	-0.842857	-1.7512	-0.604733	-1.76737	0.455243		5	0.992464	0.0149711
	1.27588	0.613514	0.402642	-1.02196	-1.72782	-0.604733	-2.73003	0.485625		5	0.963392	0.00841441
	1.57427	0.792925	0.778984	-0.886601	-2.06516	-0.574149	-3.08312	0.47363		5	1.03425	0.031779
	1.97454	0.772634	0.473855	-1.2	-1.52092	-0.192581	-3.20533	0.291989		5	1.00378	0.018518
	1.8512	0.659464	0.480226	-1.25735	-1.63675	-0.0477454	-3.06537	0.485861		5	0.987363	0.0135741
	1.26313	0.765033	0.61135	-0.835317	-2.44362	-0.322697	-3.03221	0.63212		5	1.04717	0.0394031
	1.95298	0.793386	0.284173	-0.288217	-1.62411	-0.36998	-2.48052	0.517377		5	0.970835	0.00979244
	0.979334	0.353043	0.162392	-1.08354	-1.90136	-0.374774	-2.96511	0.443466		5	0.971478	0.00992022
	0.89083	0.793386	0.490843	-0.861691	-1.45638	-0.334981	-2.33365	0.485973		5	0.934493	0.00454448
	1.64711	0.501419	0.733086	-0.288217	-1.91122	-0.604733	-2.92419	0.502227		5	1.01051	0.0209484
	2.25712	0.758693	0.778984	-0.82944	-1.44436	-0.467176	-2.93609	0.318463		5	1.01563	0.0229748
	0.901195	0.37151	0.44711	-1.01317	-2.44931	-0.490504	-2.81088	0.437123		5	1.03055	0.0298378
	1.81085	0.737044	0.49463	-0.86863	-1.54399	-0.332468	-3.01161	0.315822		5	0.971623	0.00994927
	2.25712	0.31295	0.413566	-0.577184	-1.54843	-0.0477454	-2.05535	0.466471		5	0.964527	0.00861301
	0.931096	0.352839	0.162392	-1.06774	-1.51735	-0.407083	-3.0134	0.265335		5	0.951334	0.00654161
	0.627569	0.469624	0.472156	-0.288217	-2.20004	-0.401828	-3.00568	0.521122		5	1.02842	0.0287631
	2.11726	0.649266	0.520981	-0.288217	-1.46101	-0.544089	-3.21791	0.465016		5	1.02178	0.0256197
	0.627569	0.308308	0.428972	-0.919842	-2.07105	-0.579157	-1.76737	0.512844		5	1.01029	0.0208629
	1.63995	0.793072	0.50314	-1.22086	-2.28245	-0.567721	-1.76737	0.547385		5	1.04702	0.039303
	1.97001	0.350206	0.634324	-1.0542	-1.76064	-0.586523	-3.0406	0.63212		5	1.01708	0.0235737
	0.855334	0.464272	0.349156	-1.21115	-1.99523	-0.421889	-2.74365	0.555785		5	0.985717	0.0131481
	1.15114	0.528704	0.162392	-0.836302	-1.49036	-0.47536	-1.76737	0.63212		5	0.945646	0.00579394
	1.71567	0.351423	0.571647	-1.21296	-2.44931	-0.0477454	-2.94696	0.441305		5	1.04461	0.0377822
	1.65462	0.724088	0.236879	-0.858316	-1.45538	-0.586574	-3.07269	0.517946		5	0.974905	0.0106262
	2.25712	0.325623	0.742209	-1.29717	-2.40908	-0.455808	-2.06251	0.377759		5	1.08152	0.0670357
	1.98021	0.358397	0.778984	-1.38016	-1.53214	-0.577355	-1.76737	0.63212		5	1.01944	0.0245872
	2.14053	0.744396	0.45445	-1.29717	-1.4587	-0.575074	-2.30519	0.293707		5	0.997844	0.0165769
	1.73716	0.582851	0.492101	-1.12822	-1.44436	-0.283614	-3.10861	0.473766		5	0.971993	0.0100235
	1.21753	0.535348	0.330444	-0.95718	-2.18216	-0.604733	-2.30132	0.409268		5	0.988257	0.0138106
	1.27625	0.343485	0.450589	-1.23318	-1.46655	-0.526449	-3.17389	0.40944		5	0.979521	0.011646
	2.03513	0.456542	0.4168	-1.22603	-1.98828	-0.0477454	-3.1908	0.458912		5	1.02785	0.0284812
	1.30118	0.613527	0.236955	-0.893658	-1.47376	-0.536076	-3.04508	0.458418		5	0.956391	0.00727689
	1.22061	0.544361	0.274661	-0.288217	-2.15963	-0.0477454	-3.21791	0.457868		5	1.01151	0.0213314
	2.10468	0.675115	0.577209	-0.872678	-1.58066	-0.383429	-3.21791	0.494512		5	1.01428	0.0224226
	1.96745	0.793157	0.53864	-0.876821	-1.92297	-0.0477454	-2.13863	0.515059		5	0.984932	0.0129489
	1.21893	0.510453	0.404647	-0.835133	-2.0178	-0.259705	-3.21791	0.522805		5	0.995851	0.0159654
	1.40334	0.669097	0.335621	-0.863864	-1.46329	-0.574532	-2.8772	0.293984		5	0.949952	0.0063526
	0.835498	0.696689	0.399912	-0.965096	-1.52013	-0.486381	-3.13787	0.357078		5	0.97651	0.0109717
	1.53531	0.490851	0.750969	-0.869794	-1.55305	-0.5468	-3.09727	0.485841		5	0.984294	0.0127891
	2.06682	0.308308	0.537476	-1.01706	-1.76087	-0.564854	-1.92357	0.608138		5	0.999764	0.0171842
	2.0366	0.381718	0.737446	-0.288217	-2.04174	-0.114379	-2.79718	0.503513		5	1.01666	0.0233997
	1.83633	0.781005	0.469998	-0.710448	-2.44931	-0.417315	-3.07652	0.63212		5	1.06471	0.0520609
	0.627569	0.793386	0.744971	-0.972008	-2.23484	-0.0477454	-2.38523	0.451068		5	1.0187	0.0242627
	1.16829	0.793205	0.637598	-1.09204	-2.38217	-0.416575	-2.00831	0.201835		5	1.03276	0.0309856
	1.00958	0.582518	0.682052	-1.22142	-2.44931	-0.604733	-2.54962	0.439104		5	1.04751	0.0396193
	2.25712	0.724188	0.309334	-1.29717	-2.04752	-0.402865	-3.07318	0.607698		5	1.06097	0.0491161
	1.83496	0.772652	0.440568	-0.848461	-1.48446	-0.377868	-3.04731	0.201835		5	0.97567	0.0107897
	1.86166	0.756243	0.624152	-1.29717	-2.32072	-0.463961	-3.07184	0.201835		5	1.07024	0.0566569
	1.43283	0.768836	0.651002	-0.82575	-1.44436	-0.470725	-2.11939	0.63212		5	0.949365	0.00627366
	2.21822	0.749734	0.778984	-1.1329	-1.92547	-0.506735	-3.20702	0.525924		5	1.06931	0.0558649
	1.77272	0.681029	0.434476	-1.03811	-1.47889	-0.166557	-2.50052	0.468246		5	0.935352	0.00463142
	1.25802	0.346179	0.778984	-1.22483	-1.46478	-0.411883	-2.51133	0.408238		5	0.951585	0.00657659
	0.627569	0.372071	0.663412	-0.776179	-1.45496	-0.594863	-2.80717	0.200829		5	0.969376	0.00950779
	2.25712	0.772489	0.919872	-0.854121	-2.14679	-0.214938	-1.98273	0.444263		6	1.14035	0.157816
	1.13052	0.308308	0.570542	-1.15218	-1.58192	-0.448773	-1.94177	0.498717		5	0.953689	0.00687549
	1.83541	0.793386	0.493106	-1.01593	-1.46961	-0.444504	-2.6496	0.400537		5	0.961958	0.00816951
	0.965312	0.379252	0.568257	-1.25091	-1.80064	-0.604733	-3.0059	0.475704		5	0.999108	0.0169746
	2.13131	0.793386	0.327513	-1.22662	-2.44931	-0.178927	-3.02369	0.547941		5	1.07945	0.0650276
	1.70098	0.36746	0.430156	-0.544848	-1.44436	-0.459695	-2.98186	0.546956		5	0.956498	0.00729311
	1.23755	0.365554	0.456063	-0.652522	-2.07128	-0.247805	-3.20693	0.448168		5	0.997626	0.0165089
	0.986978	0.549613	0.380136	-0.288217	-1.97881	-0.564261	-1.76737	0.498138		5	0.995105	0.0157417
	1.79298	0.623695	0.449438	-1.11475	-1.46543	-0.393352	-3.15008	0.585322		5	0.985678	0.0131381
	2.04488	0.654995	0.434107	-0.790988	-1.47155	-0.411419	-2.44421	0.39241		5	0.957003	0.00737053
	1.78228	0.74509	0.254117	-1.29717	-1.55578	-0.422204	-2.41822	0.443005		5	0.964366	0.00858456
	2.17495	0.317815	0.40337	-0.952087	-1.85922	-0.487375	-3.06879	0.482346		5	1.02222	0.0258217
	1.6875	0.621569	0.471061	-0.714076	-1.63068	-0.270754	-3.05472	0.201835		5	0.965661	0.00881525
	1.67395	0.511724	0.718629	-0.916007	-1.44436	-0.565869	-3.03252	0.63212		5	0.983151	0.0125068
	1.60279	0.727375	0.525246	-0.825995	-1.4786	-0.574055	-2.99549	0.365406		5	0.971175	0.00985974
	0.89942	0.675989	0.463577	-0.780614	-2.08183	-0.353761	-1.76737	0.490666		5	0.995057	0.0157274
	1.10097	0.427608	0.309986	-0.961207	-2.07676	-0.524671	-3.07092	0.49947		5	0.999969	0.0172505
	1.2368	0.651543	0.421708	-1.17912	-2.43007	-0.604733	-2.22231	0.521158		5	1.03316	0.0311974
	1.80842	0.758596	0.474084	-0.956009	-1.77658	-0.604683	-3.20691	0.454724		5	1.01918	0.0244735
	1.7831	0.785698	0.162392	-0.974132	-1.44436	-0.585335	-2.73685	0.326114		5	0.963781	0.00848209
	2.20157	0.791428	0.694118	-0.288217	-1.88998	-0.494395	-2.21506	0.560125		5	1.0287	0.0289046
	0.627569	0.520944	0.405927	-0.941334	-1.5022	-0.495876	-3.20709	0.4803		5	0.989136	0.0140465
	1.3634	0.610939	0.47706	-0.790007	-1.5653	-0.407992	-2.56913	0.63212		5	0.93528	0.00462401
	1.65062	0.768263	0.419924	-1.04512	-1.87882	-0.50699	-1.76737	0.482364		5	0.994772	0.0156429
	0.627569	0.414263	0.292364	-0.967538	-1.5707	-0.412912	-1.83787	0.472157		5	0.960555	0.00793581
	2.00666	0.687525	0.281974	-1.07372	-1.69705	-0.60057	-2.66337	0.490327		5	0.991146	0.0145988
	1.9752	0.585123	0.440514	-0.952586	-1.49673	-0.30714	-2.00805	0.458992		5	0.954161	0.00694416
	1.56333	0.314479	0.423616	-1.155	-1.7351	-0.597353	-3.20373	0.478604		5	1.00218	0.0179745
	1.05807	0.64474	0.778367	-0.830181	-1.58218	-0.0477454	-3.21586	0.512443		5	0.978315	0.0113717
	1.37831	0.792788	0.488334	-0.880598	-1.52354	-0.549983	-3.21791	0.63212		5	0.991096	0.014585
	1.44235	0.793077	0.406054	-1.06775	-1.44436	-0.0477454	-3.16181	0.201835		5	0.961325	0.00806339
	2.25251	0.736262	0.162392	-0.9172	-1.49584	-0.41319	-2.63747	0.491875		5	0.98408	0.0127357
	1.69602	0.308308	0.415034	-1.20906	-1.9616	-0.0477454	-3.18192	0.445882		5	1.00365	0.0184725
	0.678741	0.572558	0.262607	-0.88047	-2.09863	-0.545743	-2.74123	0.479525		5	0.997341	0.0164205
	1.38182	0.680607	0.437513	-0.831026	-1.45756	-0.508799	-3.1217	0.481967		5	0.966203	0.00891338
	0.922815	0.497578	0.433922	-1.24207	-2.44931	-0.487427	-2.9935	0.444181		5	1.05004	0.0412846
	1.64427	0.731846	0.685438	-1.27537	-2.02446	-0.604733	-2.98199	0.258551		5	1.03445	0.0318849
	1.33242	0.745787	0.341389	-1.25353	-2.19842	-0.0837148	-3.2056	0.445296		5	1.02734	0.0282336
	0.978594	0.497337	0.525285	-0.288217	-1.45725	-0.0477454	-3.1386	0.497359		5	0.958791	0.0076505
	1.37399	0.793386	0.465717	-1.25957	-1.8206	-0.562765	-2.9369	0.193724		5	0.999209	0.0170068
	1.9612	0.463991	0.440426	-0.930701	-1.93271	-0.471014	-3.21791	0.506082		5	1.02425	0.0267539
	0.853968	0.755825	0.366204	-0.843204	-1.99518	-0.0477454	-3.10034	0.531835		5	0.992187	0.0148922
	1.80529	0.517834	0.727907	-1.23415	-1.4999	-0.344998	-3.12349	0.46646		5	0.99658	0.0161869
	0.99848	0.620766	0.778984	-0.420657	-1.45158	-0.604733	-2.04579	0.63212		5	0.968192	0.00928209
	0.940292	0.493277	0.490894	-0.34873	-1.51921	-0.0477454	-2.66817	0.46039		5	0.926903	0.00383787
	1.3127	0.757931	0.454606	-0.915585	-1.47238	-0.468071	-3.17198	0.470398		5	0.972969	0.0102221
	1.88734	0.764952	0.162392	-0.802628	-1.46443	-0.19732	-2.81898	0.488622		5	0.949291	0.00626381
	0.627569	0.793008	0.474513	-0.288217	-1.99312	-0.41418	-1.76737	0.454831		5	1.01569	0.0229967
	1.76662	0.576861	0.39168	-0.288217	-1.5555	-0.606148	-3.21791	0.59518		5	1.00475	0.0188515
	0.92563	0.582135	0.451566	-0.825189	-1.50489	-0.0477454	-2.74831	0.322353		5	0.920464	0.00331739
	0.750229	0.689773	0.633974	-0.868143	-1.54111	-0.584685	-3.21566	0.63212		5	1.00564	0.0191629
	1.09679	0.308308	0.560123	-1.19206	-2.0593	-0.383942	-2.1668	0.453311		5	0.98068	0.0119152
	0.627569	0.534416	0.515512	-1.29717	-1.44436	-0.453859	-2.37428	0.363907		5	0.964223	0.0085594
	1.39964	0.392119	0.418702	-1.05186	-1.9605	-0.45873	-1.76737	0.406086		5	0.98019	0.0118007
	2.02665	0.697215	0.405674	-0.837804	-1.4451	-0.423217	-3.00704	0.468314		5	0.981356	0.0120745
	0.627569	0.602103	0.736434	-1.29717	-1.95997	-0.377862	-3.09081	0.471768		5	1.03267	0.030936
	2.06896	0.54462	0.435198	-0.966508	-1.91569	-0.585317	-3.13117	0.496348		5	1.03172	0.0304378
	1.27408	0.556338	0.438862	-0.526224	-1.87102	-0.370945	-1.76737	0.483052		5	0.96681	0.00902457
	1.38164	0.790887	0.593507	-0.86463	-1.4606	-0.507537	-3.21791	0.459487		5	0.985092	0.0129892
	1.16783	0.718173	0.260967	-1.21572	-1.45986	-0.53908	-3.12726	0.452452		5	0.979077	0.0115444
	1.39218	0.255221	0.778984	-0.849527	-1.44436	-0.0680352	-3.1856	0.412		5	0.963567	0.0084448
	2.0658	0.594671	0.509135	-0.945512	-1.64563	-0.578779	-1.80311	0.452147		5	0.997272	0.0163991
	0.719782	0.793386	0.410488	-0.288217	-1.79305	-0.492109	-3.21791	0.496432		5	1.01686	0.0234841
	1.19746	0.534934	0.388296	-1.13439	-1.86919	-0.571631	-3.22034	0.621089		5	1.00917	0.020442
	1.08124	0.308308	0.479706	-1.29717	-1.44436	-0.374922	-3.04496	0.454274		5	0.965666	0.00881627
	1.86318	0.721014	0.498627	-0.288217	-2.27671	-0.574352	-3.21347	0.201835		5	1.06762	0.0544392
	2.07255	0.432274	0.443025	-0.841981	-2.17621	-0.459641	-2.93069	0.63212		5	1.03397	0.0316317
	0.841569	0.720648	0.426728	-1.03959	-1.6509	-0.089665	-3.06764	0.63212		5	0.971149	0.00985459
	0.728471	0.308308	0.906338	-0.918336	-1.95803	-0.0639561	-1.76737	0.63212		5	1.00698	0.0196417
	1.807	0.651895	0.498324	-0.833888	-2.09445	-0.346413	-3.05987	0.459394		5	1.01546	0.0229037
	1.56161	0.565453	0.4809	-0.776969	-2.09269	-0.458732	-2.50393	0.477364		5	0.98082	0.011948
	0.898089	0.793386	0.455922	-0.829086	-1.63702	-0.395691	-3.21791	0.63212		5	0.990955	0.0145457
	0.90107	0.763886	0.440759	-0.882273	-1.5267	-0.217111	-3.07248	0.63212		5	0.963519	0.0084364
	1.98813	0.701325	0.162392	-1.29432	-2.25047	-0.427007	-1.76737	0.58545		6	1.13857	0.154345
	1.78777	0.405149	0.48522	-1.11205	-1.49449	-0.604733	-2.44026	0.201835		5	0.960498	0.00792648
	0.627569	0.707731	0.666202	-1.13556	-2.11315	-0.448963	-2.70801	0.229272		5	1.02017	0.0249036
	0.857753	0.618808	0.263244	-0.953205	-1.91446	-0.0477454	-3.10483	0.454656		5	0.978293	0.0113668
	0.627569	0.342878	0.339932	-0.706103	-1.81727	-0.563356	-2.56359	0.57467		5	0.968995	0.00943465
	1.69727	0.308308	0.750857	-0.830312	-1.6702	-0.604733	-1.76737	0.486199		5	0.986126	0.0132528
	1.45924	0.793386	0.440368	-0.53981	-2.01013	-0.0477454	-3.21791	0.533563		5	1.00447	0.0187545
	1.10698	0.379899	0.712674	-0.288217	-1.52829	-0.565537	-3.09897	0.332757		5	0.982688	0.012394
	1.18182	0.432588	0.412915	-0.288217	-2.17641	-0.16694	-3.21791	0.535308		5	1.01689	0.0234941
	0.905328	0.485122	0.437683	-0.555748	-2.44931	-0.580073	-2.96227	0.201835		5	1.04105	0.0356229
	1.02681	0.530725	0.468342	-0.288217	-2.03169	-0.604733	-2.98266	0.407586		5	1.00578	0.0192121
	1.57857	0.792973	0.554777	-0.831882	-2.44931	-0.57334	-2.66728	0.281313		5	1.04279	0.0366677
	1.14361	0.717738	0.484575	-0.918613	-2.44931	-0.557507	-3.21791	0.489475		5	1.0626	0.0503802
	0.795526	0.614194	0.284367	-1.21756	-2.36949	-0.49642	-3.07966	0.256672		5	1.04859	0.0403204
	1.42608	0.663486	0.202143	-0.836616	-1.53456	-0.604733	-3.20721	0.472101		5	0.980778	0.0119382
	1.73709	0.647271	0.465038	-1.10972	-2.16433	-0.588736	-3.08345	0.201835		5	1.03838	0.0340708
	1.26683	0.569444	0.474799	-0.839596	-2.04035	-0.0477454	-2.78167	0.456203		5	0.965328	0.00875541
	1.2687	0.499452	0.75387	-0.549842	-1.44517	-0.372432	-1.9763	0.20988		5	0.939943	0.00512138
	1.23061	0.308308	0.431607	-1.10054	-2.44931	-0.479226	-2.00181	0.472213		5	1.02267	0.0260244
	1.98641	0.708539	0.528933	-0.288217	-1.71235	-0.339208	-1.90662	0.63212		5	0.990741	0.0144859
	1.93553	0.732408	0.540145	-0.761362	-1.52975	-0.370568	-3.20409	0.631503		5	0.999721	0.0171706
	1.33301	0.3291	0.466549	-1.04382	-1.4767	-0.131509	-2.97485	0.443226		5	0.936756	0.00477659
	0.947082	0.553211	0.162392	-1.08	-1.44436	-0.600908	-1.76737	0.456234		5	0.961043	0.00801652
	1.91819	0.559988	0.242876	-1.09513	-1.57208	-0.368684	-3.13853	0.435478		5	0.987918	0.0137206
	1.55877	0.492608	0.688034	-0.435743	-1.46579	-0.609183	-1.76737	0.590667		5	0.973126	0.0102545
	2.10228	0.516302	0.379393	-0.519468	-1.55509	-0.303154	-3.02003	0.487739		5	0.983639	0.0126266
	2.25712	0.676961	0.757557	-1.02457	-2.40964	-0.541854	-2.15262	0.255235		6	1.19956	0.301387
	1.56213	0.703715	0.345708	-0.852068	-1.57475	-0.398477	-3.21791	0.452426		5	0.977584	0.0112083
	2.19777	0.293713	0.44683	-0.288217	-1.76061	-0.452637	-1.76737	0.465728		5	1.00922	0.0204619
	2.04681	0.377835	0.417519	-1.31513	-1.77882	-0.330367	-2.38223	0.533939		5	0.988114	0.0137725
	1.92019	0.793141	0.433075	-0.288217	-1.44436	-0.604733	-2.55021	0.492423		5	0.977041	0.0110881
	1.65844	0.397285	0.417467	-0.833197	-2.28939	-0.576247	-3.19498	0.58128		5	1.04365	0.0371881
	2.00533	0.527952	0.378333	-0.468772	-2.1221	-0.463923	-3.1324	0.54798		5	1.03708	0.0333352
	1.7201	0.63624	0.228519	-0.832308	-1.94524	-0.604733	-3.16651	0.457383		5	1.01319	0.0219868
	1.06854	0.308308	0.44375	-0.890396	-2.28782	-0.484801	-3.19883	0.565035		5	1.03199	0.0305806
	1.9966	0.547105	0.446616	-0.319934	-1.91632	-0.593563	-3.16571	0.506616		5	1.03373	0.0314978
	1.66435	0.788016	0.537462	-1.29717	-1.45344	-0.461217	-3.08789	0.63212		5	0.997521	0.0164765
	1.57763	0.376809	0.433606	-0.727884	-1.66582	-0.433312	-2.99504	0.470285		5	0.960506	0.00792787
	1.04647	0.575559	0.764851	-1.20989	-2.44931	-0.425109	-2.54803	0.564545		5	1.0439	0.0373464
	0.984677	0.308308	0.588281	-0.858764	-1.74378	-0.554868	-3.20047	0.201835		5	0.992531	0.0149902
	2.25712	0.308308	0.778984	-0.849676	-1.64335	-0.565378	-3.128	0.447203		5	1.03615	0.0328192
	0.782345	0.793386	0.573068	-1.29717	-2.50335	-0.428446	-3.11049	0.486169		5	1.08167	0.0671866
	2.25712	0.678078	0.194964	-1.22059	-1.52602	-0.534173	-3.14821	0.462147		5	1.03032	0.0297214
	2.25712	0.741874	0.680901	-0.861978	-2.0337	-0.592175	-3.20634	0.517405		5	1.07345	0.059472
	1.50679	0.749931	0.210112	-0.288217	-1.97776	-0.51747	-2.99582	0.430766		5	1.00216	0.0179697
	1.79521	0.717303	0.41094	-0.536882	-1.50285	-0.545363	-3.15272	0.220921		5	0.989436	0.0141276
	1.61932	0.793124	0.778984	-0.956495	-2.33931	-0.16811	-3.08927	0.456439		5	1.04941	0.0408643
	1.51517	0.608168	0.668463	-0.352302	-1.83445	-0.383935	-3.13426	0.493928		5	0.999143	0.0169857
	0.753001	0.786901	0.447328	-0.288217	-1.44436	-0.50977	-3.08428	0.63212		5	0.990707	0.0144765
	1.37025	0.394382	0.446742	-1.29717	-2.26284	-0.0477454	-3.21224	0.600267		5	1.03449	0.0319108
	0.9255	0.793386	0.414826	-1.06095	-1.95349	-0.0477454	-1.94605	0.522126		5	0.975161	0.0106806
	1.94032	0.490732	0.440366	-0.747501	-1.4779	-0.594337	-1.76737	0.495191		5	0.974972	0.0106404
	2.25712	0.679391	0.162392	-0.858906	-1.62569	-0.604733	-2.93118	0.63212		5	1.01634	0.0232656
	2.25712	0.501869	0.610496	-0.820639	-2.44931	-0.35271	-3.05446	0.446211		5	1.08298	0.0684777
	2.0353	0.36631	0.426231	-0.901324	-1.49195	-0.595597	-3.04704	0.358163		5	0.992619	0.0150155
	0.981734	0.308308	0.643951	-1.18351	-2.18394	-0.0477454	-1.9666	0.47843		5	0.997888	0.0165905
	1.42528	0.793386	0.602586	-1.10022	-1.95448	-0.377739	-2.0633	0.552704		5	0.986436	0.0133326
	1.66687	0.433367	0.449523	-0.404467	-1.56071	-0.259609	-3.21791	0.50352		5	0.975115	0.0106709
	0.96597	0.59808	0.162392	-0.300994	-1.69855	-0.459629	-3.114	0.447292		5	0.979424	0.0116238
	1.74989	0.74979	0.162392	-0.861304	-2.46727	-0.298989	-3.21791	0.63212		5	1.06393	0.051438
	0.627569	0.487435	0.638867	-1.09574	-1.48986	-0.587265	-3.09535	0.274789		5	0.996771	0.0162451
	0.627569	0.367712	0.49733	-1.29717	-2.33808	-0.252722	-3.11896	0.47424		5	1.0522	0.0427463
	1.64255	0.365483	0.163511	-1.09592	-1.87522	-0.601324	-2.94264	0.477194		5	0.989183	0.0140592
	1.3359	0.343974	0.412223	-1.09203	-2.44931	-0.436847	-2.95817	0.428422		5	1.03389	0.0315868
	2.21921	0.703224	0.840424	-1.29717	-1.78707	-0.469095	-2.21598	0.475409		5	1.03369	0.0314763
	2.03625	0.793386	0.778984	-0.757558	-1.46052	-0.543432	-3.11184	0.488501		5	1.01577	0.0230324
	0.8773	0.622598	0.677634	-0.515807	-1.55246	-0.372477	-3.11623	0.447688		5	0.975742	0.0108052
	2.16658	0.42626	0.320836	-1.24107	-2.02806	-0.506992	-2.97134	0.63212		5	1.04191	0.0361347
	1.51685	0.325231	0.479012	-1.29717	-1.47516	-0.604733	-3.21791	0.490551		5	0.998487	0.016778
	1.2526	0.589546	0.280054	-0.302506	-1.92372	-0.587063	-3.20759	0.498913		5	1.00904	0.0203947
	1.64317	0.482943	0.408544	-1.27969	-1.74392	-0.591878	-2.09638	0.201835		5	0.977736	0.0112421
	1.19374	0.700527	0.318208	-1.02886	-2.44931	-0.596211	-2.94818	0.63212		5	1.04769	0.0397373
	2.11195	0.793386	0.350371	-0.506674	-1.46554	-0.0477454	-1.76737	0.463143		5	0.970779	0.00978128
	1.19683	0.530873	0.477941	-1.03716	-1.78058	-0.602607	-3.20489	0.445387		5	0.998456	0.0167684
	1.23167	0.765603	0.655292	-0.881603	-1.46098	-0.55861	-3.00541	0.486604		5	0.972253	0.0100761
	1.68443	0.308308	0.451554	-0.945464	-1.98121	-0.431395	-3.21385	0.485549		5	1.01037	0.0208931
	1.06822	0.308308	0.508149	-1.29717	-1.53054	-0.364044	-1.77778	0.464824		5	0.962719	0.00829869
	1.48445	0.745655	0.410544	-0.833602	-1.77842	-0.344935	-3.0093	0.443681		5	0.971424	0.00990945
	1.86414	0.527303	0.573782	-0.901323	-1.44436	-0.211706	-3.10556	0.28756		5	0.969776	0.00958497
	1.94141	0.821353	0.735904	-1.22987	-2.26489	-0.486352	-3.08553	0.476319		5	1.07466	0.060567
	2.03914	0.348761	0.22053	-1.28181	-2.44931	-0.512306	-3.20376	0.505438		5	1.08689	0.0724683
	0.627569	0.620899	0.320413	-1.23017	-1.53254	-0.577826	-1.76737	0.44996		5	0.989498	0.0141446
	2.25712	0.39524	0.446811	-1.2023	-1.51462	-0.164812	-3.03452	0.201835		5	1.00414	0.0186397
	1.62255	0.315615	0.262776	-0.794819	-1.74997	-0.0477454	-3.16852	0.590782		5	0.969012	0.00943789
	1.69727	0.699856	0.516255	-1.17324	-2.12036	-0.573619	-1.9733	0.447234		5	1.01737	0.0236968
	1.61675	0.586797	0.281637	-0.843075	-1.51214	-0.0477454	-2.09288	0.495125		5	0.916328	0.00301745
	1.62588	0.524092	0.407292	-1.27196	-1.64092	-0.0741572	-3.02517	0.456657		5	0.968748	0.00938744
	0.627569	0.793386	0.419918	-0.429707	-2.43639	-0.465555	-3.17896	0.34516		5	1.06986	0.0563346
	1.57764	0.600636	0.268404	-1.14419	-1.64267	-0.538778	-1.76737	0.48687		5	0.971879	0.0100007
	2.04107	0.76471	0.486169	-0.827727	-1.4641	-0.344563	-2.13307	0.570404		5	0.962794	0.00831153
	1.45853	0.685392	0.423499	-0.637659	-2.28292	-0.289631	-3.11544	0.563077		5	1.02415	0.0267065
	0.680817	0.793386	0.269922	-1.24086	-1.50359	-0.425846	-3.18067	0.474421		5	0.997984	0.0166203
	1.69565	0.687868	0.430105	-0.801226	-1.52728	-0.192039	-3.21791	0.438582		5	0.972156	0.0100566
	1.28548	0.579713	0.460162	-0.919824	-2.00653	-0.593669	-2.95469	0.262163		5	0.994043	0.0154279
	1.41372	0.495736	0.73457	-0.973865	-1.44436	-0.342176	-1.76737	0.471831		5	0.954206	0.00695074
	2.0444	0.557924	0.605208	-0.987632	-1.48909	-0.527611	-3.20796	0.499684		5	1.01274	0.0218105
	0.986913	0.663844	0.594107	-1.24554	-2.44931	-0.335911	-3.13587	0.459678		5	1.06167	0.0496596
	1.86087	0.468562	0.249884	-1.15462	-1.44436	-0.0815195	-2.9698	0.484463		5	0.955553	0.00715025
	2.23782	0.650914	0.162392	-1.24103	-1.61225	-0.589886	-3.14955	0.485125		5	1.03663	0.0330848
	1.84216	0.511021	0.430533	-0.86405	-1.55445	-0.0477454	-3.21791	0.446472		5	0.97449	0.0105384
	0.988029	0.489075	0.563136	-0.871564	-2.41847	-0.353759	-3.1345	0.602916		5	1.04409	0.0374624
	1.78315	0.671798	0.47407	-0.288217	-1.4857	-0.481997	-3.0791	0.472086		5	0.985263	0.0130325
	0.627569	0.573682	0.318957	-0.807261	-2.08304	-0.357624	-2.78094	0.63212		5	0.994999	0.0157101
	2.03809	0.546461	0.510572	-0.288217	-1.98236	-0.529741	-3.06952	0.461532		5	1.03371	0.0314902
	2.04867	0.414918	0.628637	-1.26824	-1.90035	-0.482628	-2.76423	0.446559		5	1.01823	0.0240651
	2.08587	0.630932	0.525936	-0.906497	-2.1561	-0.562293	-2.67468	0.421522		5	1.03153	0.0303433
	1.3091	0.308308	0.599319	-1.12959	-2.24737	-0.390679	-1.959	0.413766		5	1.00474	0.0188495
	0.627569	0.725581	0.573731	-1.04127	-1.78005	-0.350692	-2.44066	0.572052		5	0.976905	0.0110582
	1.2834	0.441861	0.534085	-0.99015	-1.58761	-0.385247	-3.17119	0.201835		5	0.969925	0.00961398
	1.79879	0.362032	0.295763	-0.851246	-1.82291	-0.42363	-3.10899	0.439814		5	0.988373	0.0138413
	1.50432	0.365359	0.455425	-0.962317	-1.83196	-0.526219	-3.20656	0.201835		5	0.996912	0.0162884
	2.21898	0.308308	0.778984	-1.01984	-1.70298	-0.581251	-3.16791	0.201835		5	1.04481	0.03791
	1.15245	0.684818	0.446369	-0.860647	-1.86025	-0.335953	-1.76737	0.383822		5	0.968439	0.00932881
	0.627569	0.336275	0.403639	-1.09544	-1.45808	-0.323265	-3.20611	0.472517		5	0.981963	0.0122192
	1.53054	0.640084	0.645581	-0.372018	-2.04962	-0.403324	-3.06011	0.576963		5	1.01417	0.0223776
	0.895794	0.339367	0.44606	-0.972295	-2.34826	-0.578772	-2.84913	0.63212		5	1.02757	0.0283446
	1.14743	0.792786	0.521796	-0.836642	-1.8906	-0.289914	-2.97079	0.522283		5	0.979387	0.0116153
	1.4888	0.396469	0.209027	-0.581985	-1.51694	-0.349142	-2.3048	0.483793		5	0.914421	0.00288756
	1.67595	0.308308	0.778984	-0.509367	-1.54851	-0.42416	-3.21698	0.431077		5	0.992406	0.0149546
	1.43739	0.43882	0.55199	-0.885449	-1.5441	-0.30842	-3.15548	0.515934		5	0.963523	0.00843721
	2.16381	0.3231	0.486819	-1.29717	-1.44436	-0.531617	-1.76737	0.474673		5	1.00452	0.0187728
	1.48325	0.749564	0.189309	-1.29717	-1.51212	-0.320358	-3.20934	0.422708		5	0.984972	0.0129589
	1.80412	0.331683	0.483184	-0.416428	-2.03393	-0.57956	-2.21996	0.478609		5	0.992024	0.0148459
	1.68331	0.491302	0.494451	-1.11762	-2.09442	-0.310874	-1.76064	0.472903		5	1.0025	0.0180825
	1.80774	0.694119	0.437129	-0.904383	-1.76656	-0.504529	-2.56822	0.202891		5	0.972346	0.0100951
	1.25708	0.371574	0.642873	-0.876658	-1.48528	-0.513869	-3.21791	0.459709		5	0.977652	0.0112234
	2.03099	0.767112	0.778984	-0.983121	-1.46228	-0.248957	-3.06056	0.201835		5	1.00077	0.0175104
	1.92517	0.352538	0.49834	-1.1569	-2.44931	-0.496578	-3.14949	0.201835		5	1.07523	0.061086
	0.942062	0.661503	0.712791	-1.29717	-1.79005	-0.571956	-1.76737	0.448768		5	1.00873	0.0202793
	1.0573	0.364254	0.695181	-1.01996	-2.42093	-0.604733	-3.08703	0.462132		5	1.0561	0.0454889
	0.627569	0.605258	0.476338	-1.23852	-2.44931	-0.0477454	-2.0617	0.63212		5	1.04253	0.0365096
	1.45336	0.530077	0.464202	-0.847401	-2.14394	-0.182677	-3.27018	0.444805		5	1.01464	0.0225707
	1.20143	0.792815	0.449871	-1.26797	-1.55467	-0.589472	-2.9414	0.503987		5	0.984061	0.0127312
	1.54924	0.576384	0.411845	-0.82714	-1.44436	-0.58632	-3.14475	0.201835		5	0.973191	0.0102678
	1.64633	0.793386	0.671294	-1.29717	-1.44436	-0.31855	-3.20765	0.471252		5	1.00181	0.0178527
	1.04148	0.785247	0.243646	-0.561645	-1.46245	-0.580658	-2.85059	0.524288		5	0.954959	0.00706161
	1.10338	0.397033	0.162392	-0.858022	-1.80385	-0.351221	-3.16485	0.533452		5	0.972377	0.0101013
	1.83681	0.703312	0.778984	-0.826142	-1.48555	-0.464494	-3.15299	0.201835		5	1.00018	0.0173192
	2.04514	0.374532	0.431207	-1.29717	-1.73508	-0.0742522	-3.20606	0.470133		5	1.01445	0.0224902
	2.19125	0.792898	0.418657	-1.00497	-1.5041	-0.533063	-2.84168	0.54369		5	1.00322	0.0183246
	0.960562	0.792844	0.225665	-0.965477	-2.17648	-0.421065	-3.10061	0.63212		5	1.02242	0.0259089
	1.34625	0.533422	0.778984	-0.917942	-1.92658	-0.392431	-3.13385	0.470811		5	1.00387	0.0185479
	2.25712	0.558472	0.421337	-0.864332	-1.54944	-0.0280036	-3.2087	0.449332		5	1.00574	0.0191972
	0.627569	0.639636	0.428856	-0.695792	-2.1147	-0.407245	-2.53289	0.201835		5	0.992213	0.0148996
	1.58634	0.683809	0.199368	-0.965557	-2.2042	-0.24281	-2.46003	0.538355		5	0.986856	0.0134416
	1.41073	0.341981	0.365286	-0.917368	-1.53048	-0.59135	-3.07567	0.453539		5	0.96503	0.00870226
	2.25712	0.631871	0.465233	-1.21457	-2.3041	-0.114198	-2.317	0.558644		5	1.04872	0.0404076
	1.58614	0.427967	0.289494	-0.910894	-1.58363	-0.550894	-3.20877	0.501923		5	0.981359	0.0120752
	2.24559	0.742814	0.29789	-1.29717	-2.24804	-0.587126	-3.08548	0.63212		5	1.08818	0.0738111
	1.77678	0.589456	0.320369	-0.764503	-2.17113	-0.400613	-3.15303	0.508551		5	1.02449	0.0268681
	2.20386	0.733083	0.444062	-0.845876	-1.44436	-0.174143	-3.07844	0.63212		5	0.996029	0.0160193
	1.44587	0.793159	0.665432	-0.891021	-2.1854	-0.0477454	-3.14814	0.63212		5	1.02676	0.0279504
	1.66934	0.501291	0.546885	-0.994743	-1.55142	-0.547389	-2.53713	0.45497		5	0.952625	0.00672282
	0.899718	0.444083	0.44971	-0.288217	-2.44931	-0.498173	-1.76737	0.201835		5	1.0414	0.03583
	2.25712	0.308308	0.197568	-0.761695	-1.48137	-0.291396	-1.76737	0.298528		5	0.977245	0.011133
	2.12764	0.792858	0.563699	-0.949057	-1.83839	-0.280482	-2.36389	0.63212		5	0.998734	0.0168561
	1.37275	0.308308	0.434254	-1.29717	-1.46502	-0.574154	-3.18617	0.418107		5	0.988167	0.0137866
	2.06138	0.793386	0.612542	-1.02067	-2.20086	-0.604733	-3.08598	0.430787		5	1.06772	0.0545246
	0.627569	0.308308	0.778984	-0.940163	-1.48401	-0.0477454	-3.21318	0.572513		5	0.990456	0.0144072
	0.627569	0.793386	0.635449	-0.475664	-1.48057	-0.0477454	-3.03081	0.359916		5	0.97198	0.0100209
	1.06182	0.484629	0.300346	-1.13213	-2.44931	-0.0952354	-2.53703	0.201835		5	1.0091	0.020418
	1.47767	0.66805	0.493729	-0.672874	-1.94162	-0.200102	-3.18856	0.453765		5	0.992901	0.0150964
	0.968699	0.642671	0.412556	-0.903164	-1.49212	-0.253439	-1.82819	0.561877		5	0.94152	0.00530004
	1.54579	0.543786	0.244026	-1.08786	-2.44931	-0.589813	-2.87798	0.503506		5	1.04196	0.0361656
	1.85646	0.543519	0.188646	-0.909895	-2.44931	-0.505519	-3.185	0.497462		5	1.06459	0.0519648
	1.1939	0.793386	0.337542	-0.758199	-1.45972	-0.514092	-3.04268	0.402054		5	0.959757	0.00780559
	1.76875	0.793386	0.272191	-1.2758	-1.45353	-0.514564	-2.70373	0.474943		5	0.972602	0.0101471
	1.39469	0.397813	0.499271	-1.14267	-1.51875	-0.259165	-3.07045	0.454312		5	0.957733	0.00748369
	1.00224	0.387523	0.581764	-1.23481	-1.93886	-0.604733	-3.15906	0.485062		5	1.01966	0.0246813
	1.12546	0.629474	0.292509	-0.288217	-1.82653	-0.604733	-3.09194	0.459898		5	0.994929	0.0156893
	0.843586	0.645214	0.355307	-1.13188	-1.9286	-0.54617	-3.22762	0.466722		5	1.01794	0.0239381
	1.50971	0.35066	0.419752	-0.342277	-2.09137	-0.604733	-2.96494	0.511816		5	1.00776	0.0199235
	1.89642	0.615235	0.600582	-0.846355	-1.50515	-0.325478	-3.17442	0.452917		5	0.987422	0.0135897
	1.59897	0.773457	0.615658	-0.757204	-1.44436	-0.435471	-2.31205	0.471493		5	0.942078	0.00536454
	1.47701	0.329849	0.413885	-0.848502	-1.52395	-0.581787	-2.97147	0.377327		5	0.956519	0.00729627
	1.43875	0.308308	0.476093	-1.2718	-2.16579	-0.471475	-3.21791	0.63212		5	1.03802	0.0338665
	2.25712	0.646916	0.415433	-1.00308	-1.44436	-0.388513	-2.68972	0.538371		5	0.985124	0.0129973
	1.70245	0.381558	0.7754	-0.288217	-1.45164	-0.406727	-2.83952	0.201835		5	0.967345	0.00912354
	0.647941	0.676536	0.338285	-0.810048	-1.45887	-0.112548	-2.16529	0.229658		5	0.929329	0.0040522
	1.03923	0.723787	0.162392	-1.21471	-1.65473	-0.105109	-3.20165	0.446448		5	0.976639	0.0109997
	0.627569	0.353823	0.575029	-1.21897	-1.81394	-0.518006	-2.22268	0.479192		5	0.986258	0.0132869
	1.23721	0.792844	0.576558	-0.288217	-1.87111	-0.42513	-1.91486	0.483437		5	0.983668	0.0126338
	1.48302	0.555957	0.778984	-1.21709	-1.92809	-0.578942	-3.14638	0.464352		5	1.02822	0.0286624
	1.3805	0.78507	0.685294	-0.984082	-2.129	-0.604733	-2.85316	0.523639		5	1.02189	0.0256693
	0.736386	0.77588	0.501708	-0.837071	-1.54893	-0.604733	-2.04434	0.501457		5	0.969548	0.00954086
	2.16484	0.763099	0.230967	-0.334368	-1.54567	-0.584325	-1.65953	0.500868		5	1.0127	0.0217966
	1.59979	0.435822	0.674203	-0.808261	-1.7792	-0.39969	-3.07399	0.583702		5	0.986781	0.0134221
	1.75096	0.758968	0.755518	-0.862978	-1.96297	-0.586368	-2.60458	0.467059		5	1.00683	0.0195858
	1.68292	0.792942	0.532365	-0.94842	-1.47379	-0.604733	-3.17852	0.43607		5	0.99678	0.016248
	1.94173	0.740941	0.639595	-1.26359	-1.87676	-0.268412	-1.96292	0.195858		5	1.00686	0.0195979
	1.52962	0.342798	0.486364	-0.865649	-1.70312	-0.536319	-3.07661	0.63212		5	0.980409	0.0118518
	0.770244	0.793041	0.162392	-1.29717	-2.44931	-0.0477454	-2.97899	0.436205		5	1.04928	0.0407762
	1.27189	0.793386	0.382274	-0.288217	-2.04738	-0.0477454	-2.08746	0.475128		5	0.975618	0.0107785
	1.06017	0.617579	0.162392	-1.29717	-1.99128	-0.353095	-3.21587	0.288914		5	1.01136	0.0212731
	0.627569	0.767894	0.667969	-0.317178	-2.36125	-0.444304	-2.13199	0.201835		5	1.0442	0.0375294
	1.86157	0.308308	0.410516	-0.786289	-1.92804	-0.57718	-3.04107	0.303146		5	1.00486	0.0188901
	0.702843	0.620889	0.669473	-0.955424	-2.05665	-0.39901	-3.14591	0.295325		5	1.02392	0.0266015
	1.8828	0.657886	0.401511	-0.967556	-2.08103	-0.289477	-2.91782	0.479267		5	1.00759	0.0198605
	0.627569	0.656769	0.162392	-0.288217	-1.73949	-0.311353	-3.20172	0.441816		5	0.999559	0.0171185
	1.73133	0.563655	0.341498	-0.834544	-1.97691	-0.430707	-3.11212	0.238466		5	1.00176	0.0178347
	1.53216	0.793386	0.455984	-1.13104	-2.20973	-0.227781	-3.20395	0.478033		5	1.03473	0.0320389
	2.11033	0.366417	0.162392	-0.288217	-1.5036	-0.561016	-3.21274	0.422792		5	1.01368	0.0221821
	1.8939	0.626967	0.416524	-1.12558	-1.63362	-0.430422	-3.11665	0.561866		5	0.998658	0.0168319
	0.885007	0.769271	0.53893	-0.470433	-1.95478	-0.142922	-2.16835	0.459214		5	0.969236	0.00948068
	1.54972	0.650497	0.242784	-0.384346	-1.9245	-0.513505	-2.83884	0.201835		5	0.982284	0.0122963
	1.38053	0.792904	0.350095	-0.288217	-1.47956	-0.444849	-3.21121	0.449894		5	0.982411	0.0123271
	1.0152	0.709345	0.162392	-1.071	-2.1052	-0.489312	-3.21436	0.537193		5	1.02341	0.0263656
	2.25712	0.818758	0.778984	-0.537333	-2.43791	-0.324203	-2.125	0.449824		6	1.18162	0.252455
	2.1591	0.623008	0.521939	-1.05799	-1.46659	-0.347925	-2.63237	0.460458		5	0.976478	0.0109647
	2.18534	0.398271	0.681334	-1.23353	-1.55289	-0.573606	-3.02798	0.494388		5	1.02696	0.0280474
	1.65841	0.405029	0.432172	-0.858353	-1.90449	0.0416436	-1.76737	0.253242		5	0.964529	0.00861321
	2.00418	0.700527	0.744273	-1.04695	-2.44931	-0.430613	-1.9243	0.423834		6	1.1659	0.213296
	2.06456	0.331677	0.677344	-0.401338	-1.44436	-0.0477454	-3.15885	0.204731		5	0.991691	0.0147517
	1.37761	0.656864	0.44198	-1.29717	-1.46811	-0.267735	-3.21791	0.454367		5	0.980279	0.0118215
	2.16134	0.371501	0.581215	-0.992546	-1.44436	-0.419051	-2.93007	0.580758		5	0.991526	0.0147053
	1.8218	0.516304	0.470703	-1.2459	-1.90529	-0.325867	-2.23642	0.470216		5	0.981769	0.012173
	2.21951	0.792875	0.426809	-1.22002	-1.78079	-0.535149	-1.88752	0.496334		6	1.13316	0.144092
	1.70557	0.792775	0.343872	-0.288217	-1.5389	-0.604733	-3.21791	0.46774		5	1.00539	0.0190749
	1.66526	0.793386	0.701448	-0.780721	-1.49593	-0.0901286	-1.18957	0.63212		6	1.03958	0.0339575
	0.627569	0.680308	0.433513	-0.878412	-1.76169	-0.0477454	-3.01275	0.201835		5	0.973103	0.0102497
	1.89232	0.308308	0.572751	-0.67124	-1.86652	-0.428394	-2.65659	0.44412		5	0.978098	0.011323
	0.627569	0.793386	0.400365	-0.636663	-2.05045	-0.206642	-3.21442	0.449796		5	1.02079	0.0251796
	1.12593	0.792981	0.587347	-1.29717	-1.70835	-0.602252	-3.01551	0.420904		5	1.00438	0.0187239
	1.71709	0.697822	0.627429	-1.29717	-2.04828	-0.430234	-3.05559	0.449891		5	1.03223	0.030706
	1.5826	0.471019	0.496035	-1.19707	-1.58556	-0.580731	-2.1651	0.456953		5	0.959989	0.0078434
	1.31971	0.775534	0.484796	-0.911245	-1.91152	-0.557157	-2.95563	0.4787		5	0.99257	0.0150015
	0.730401	0.308308	0.402006	-0.833399	-1.8504	-0.581804	-3.17569	0.458537		5	1.00172	0.0178213
	1.32974	0.793386	0.162392	-0.978679	-1.47518	-0.591858	-1.82335	0.478983		5	0.95944	0.00775448
	1.37995	0.335044	0.403607	-0.897605	-1.98462	-0.478	-2.97534	0.448993		5	0.981978	0.012223
	1.36025	0.569398	0.675854	-1.23156	-1.66698	-0.495667	-3.21791	0.480147		5	1.0047	0.0188331
	1.84968	0.308308	0.162392	-1.25732	-2.10687	-0.583882	-2.93898	0.201835		5	1.02593	0.0275507
	2.05976	0.735538	0.637616	-0.535363	-1.76959	-0.457858	-3.08115	0.577998		5	1.02123	0.0253739
	1.25652	0.596707	0.396764	-0.848431	-2.44931	-0.214794	-1.76737	0.469495		5	1.02214	0.0257822
	2.25712	0.559865	0.424355	-0.950051	-1.49166	-0.41933	-3.21791	0.469426		5	1.01816	0.0240322
	0.627569	0.73283	0.162392	-0.489482	-1.55261	-0.598784	-2.99151	0.300528		5	0.982749	0.0124089
	1.99638	0.376737	0.778984	-0.852043	-1.64002	-0.135091	-1.81045	0.413661		5	0.978472	0.0114072
	1.54464	0.370228	0.162392	-0.288217	-1.5557	-0.604733	-2.96789	0.525023		5	0.968746	0.0093871
	1.99904	0.29297	0.703442	-0.924819	-2.00506	-0.379295	-2.25544	0.490054		5	0.999919	0.0172342
	1.152	0.475541	0.478579	-0.288217	-1.455	-0.206666	-3.01763	0.477508		5	0.946283	0.0058737
	1.72081	0.308308	0.162392	-1.14511	-1.81244	-0.361872	-2.93348	0.495367		5	0.976267	0.0109186
	0.990619	0.718454	0.25872	-1.04203	-2.03595	-0.460742	-2.43147	0.454865		5	0.976127	0.0108883
	1.38901	0.449368	0.584574	-1.282	-1.44436	-0.198065	-2.42731	0.556716		5	0.935917	0.0046893
	0.942614	0.644468	0.277276	-0.65063	-2.44931	-0.604733	-1.76737	0.213211		5	1.03905	0.034457
	0.930815	0.719317	0.190604	-1.08278	-1.85372	-0.499789	-3.05485	0.37758		5	0.99014	0.0143199
	1.67191	0.568144	0.162392	-1.23429	-1.58543	-0.493371	-1.76737	0.586011		5	0.973991	0.0104338
	1.98599	0.368893	0.430849	-0.598705	-1.5619	-0.40834	-3.12514	0.51765		5	0.98696	0.0134687
	1.62359	0.312718	0.609877	-1.0104	-1.60074	-0.0477454	-1.97036	0.505204		5	0.94031	0.0051625
	0.647556	0.238006	0.162392	-1.21411	-1.45971	-0.153267	-3.21172	0.201835		5	0.977574	0.011206
	1.74462	0.699856	0.394617	-0.588276	-1.96201	-0.601271	-2.11524	0.456749		5	0.987975	0.0137357
	1.07824	0.752745	0.341028	-0.288217	-1.46531	-0.46824	-3.21791	0.544997		5	0.983671	0.0126345
	1.02576	0.792919	0.415883	-0.473786	-1.47158	-0.425186	-3.2062	0.261614		5	0.975172	0.0106829
	0.93232	0.617662	0.433359	-1.14079	-2.29666	-0.531925	-3.0937	0.294992		5	1.03896	0.0344045
	0.627569	0.585051	0.506707	-0.947048	-2.02264	-0.573359	-2.20481	0.439541		5	0.996195	0.0160697
	0.627569	0.510997	0.561474	-1.03668	-2.44931	-0.561602	-2.49203	0.468121		5	1.04347	0.0370812
	1.69864	0.707033	0.683635	-1.03192	-1.44436	-0.376174	-3.06572	0.472835		5	0.978979	0.0115221
	2.08852	0.793386	0.203244	-0.883569	-1.94899	-0.512567	-3.15227	0.201835		5	1.03647	0.0329958
	0.728695	0.674074	0.372598	-1.10743	-1.71611	-0.227854	-1.76737	0.355029		5	0.972242	0.010074
	0.627569	0.499569	0.334634	-0.288217	-1.60314	-0.372399	-2.5041	0.556193		5	0.95532	0.00711528
	0.627569	0.751824	0.778984	-0.853454	-1.6022	-0.604733	-2.43281	0.484964		5	0.985453	0.0130807
	0.627569	0.525086	0.530811	-0.956069	-1.67095	-0.19358	-2.79992	0.501583		5	0.960042	0.00785198
	1.84369	0.697048	0.468173	-1.18011	-1.99248	-0.401009	-2.19785	0.492731		5	0.996815	0.0162586
	1.52158	0.308308	0.162392	-0.288217	-1.58963	-0.47508	-3.04076	0.507759		5	0.966389	0.00894742
	2.01633	0.717562	0.443554	-1.21854	-1.92235	-0.445589	-1.8499	0.524579		6	1.13119	0.140467
	1.52303	0.495287	0.755991	-0.975647	-1.50142	-0.355933	-1.73373	0.267284		5	0.963224	0.00838551
	2.11782	0.308308	0.586465	-1.25423	-1.66133	-0.36896	-2.41543	0.377845		5	0.988534	0.0138845
	0.627569	0.308308	0.584262	-0.556825	-1.44436	-0.0939528	-2.68622	0.63212		5	0.943163	0.00549201
	2.00223	0.330742	0.351012	-1.16995	-1.29743	-0.598337	-3.195	0.451801		5	1.00342	0.0183947
	2.02611	0.355148	0.421096	-0.986846	-1.71243	-0.583308	-2.1052	0.465715		5	0.981516	0.0121126
	0.637647	0.469935	0.162392	-1.09354	-2.44931	-0.326858	-1.9283	0.490286		5	1.03281	0.0310098
	0.627569	0.545922	0.778984	-1.02145	-1.60379	-0.432481	-2.96052	0.449762		5	0.990395	0.0143901
	1.59015	0.52011	0.778984	-1.03082	-1.44436	-0.0477454	-3.03412	0.457742		5	0.961201	0.00804276
	1.28341	0.652066	0.73667	-0.959318	-2.52652	-0.576901	-2.88124	0.201835		5	1.06057	0.0488157
	1.18732	0.345602	0.38939	-0.916109	-1.44436	-0.372654	-2.09184	0.489965		5	0.918328	0.00315927
	1.62308	0.793386	0.673691	-0.847122	-1.53103	-0.602625	-3.0657	0.201835		5	0.992287	0.0149206
	1.11646	0.777941	0.558301	-1.15313	-1.53361	-0.410406	-2.57903	0.45402		5	0.951548	0.00657139
	2.19345	0.436411	0.405472	-0.731031	-1.48497	-0.150392	-2.25968	0.488697		5	0.952658	0.00672748
	0.627569	0.367873	0.461592	-0.875893	-1.91019	-0.581372	-1.76737	0.521073		5	0.998075	0.0166488
	1.4382	0.675388	0.429366	-1.21367	-1.85486	-0.537576	-3.21086	0.201835		5	1.01291	0.0218756
	0.956331	0.766102	0.581858	-1.18774	-2.32991	-0.436831	-3.15949	0.441511		5	1.05474	0.0445166
	1.91478	0.500578	0.211889	-0.957885	-2.02376	-0.604733	-3.06062	0.455375		5	1.0213	0.0254048
	1.82029	0.525735	0.435893	-0.869241	-1.73219	-0.593216	-2.50022	0.559108		5	0.96968	0.00956645
	1.54613	0.337124	0.459019	-0.985162	-1.56779	-0.588924	-2.43645	0.63212		5	0.948267	0.00612845
	1.09624	0.345022	0.44839	-0.422932	-1.54437	-0.553658	-2.92887	0.201835		5	0.954414	0.00698113
	1.91825	0.308308	0.162392	-1.01834	-1.48794	-0.0477454	-3.08785	0.436556		5	0.963159	0.00837431
	2.25712	0.755784	0.650133	-1.29717	-1.55728	-0.604733	-2.21171	0.462773		5	1.02283	0.0260999
	1.57858	0.448496	0.162392	-0.847183	-2.20293	-0.286913	-3.11764	0.46042		5	1.00819	0.0200797
	2.01649	0.761082	0.579276	-1.09126	-1.46583	-0.604733	-3.24793	0.477326		5	1.02623	0.0276912
	0.627569	0.777279	0.749658	-1.22592	-1.48014	-0.604733	-1.94217	0.476184		5	1.00246	0.0180697
	2.25712	0.480086	0.672054	-0.296243	-2.44931	-0.578551	-1.76737	0.63212		5	1.09399	0.080146
	1.97938	0.68606	0.474946	-1.02794	-2.44931	-0.479569	-2.43318	0.608848		5	1.05255	0.0429839
	1.85294	0.793386	0.778984	-1.12844	-2.01541	-0.401502	-3.2037	0.493674		5	1.04862	0.0403452
	2.25712	0.743772	0.778984	-1.18775	-2.07751	-0.476994	-3.08454	0.472741		5	1.07601	0.0617966
	1.398	0.783626	0.569341	-1.02717	-1.46328	-0.39117	-2.73645	0.483969		5	0.948325	0.00613609
	1.1122	0.589631	0.442154	-0.971488	-1.44436	-0.589601	-2.55196	0.201835		5	0.938543	0.00496733
	2.07327	0.501773	0.654668	-1.11193	-2.23093	-0.111776	-3.20821	0.450847		5	1.05904	0.0476531
	1.93068	0.6652	0.526431	-0.966502	-2.01232	-0.478952	-3.10262	0.492628		5	1.02814	0.0286265
	2.16835	0.367821	0.761558	-1.08514	-1.65938	-0.576591	-3.13586	0.501863		5	1.03636	0.032933
	1.03298	0.379179	0.372067	-0.864486	-1.45229	-0.4337	-3.12487	0.478819		5	0.95492	0.00705573
	0.914923	0.308308	0.324214	-0.763843	-1.8059	-0.573762	-2.94431	0.264604		5	0.968993	0.00943422
	0.627569	0.793386	0.719613	-0.85123	-2.02953	-0.575204	-2.60773	0.372205		5	1.01449	0.0225094
	1.93467	0.792899	0.306573	-0.683852	-1.51588	-0.464375	-3.21791	0.201835		5	0.999656	0.0171498
	2.02614	0.73558	0.778984	-0.859741	-2.2752	-0.102491	-2.68781	0.475336		5	1.03819	0.0339606
	2.25712	0.64888	0.778984	-0.791669	-1.96949	-0.527356	-3.08148	0.472567		5	1.05676	0.0459704
	1.9165	0.553108	0.162392	-0.534616	-2.40522	-0.465886	-3.09978	0.448085		5	1.05432	0.0442186
	1.04183	0.823617	0.445838	-0.83948	-1.74833	-0.276794	-2.83934	0.459475		5	0.958006	0.00752641
	1.316	0.733807	0.162392	-0.90506	-1.51128	-0.442217	-1.89985	0.215822		5	0.941166	0.00525943
	1.41974	0.562107	0.300953	-1.29717	-2.44931	-0.49521	-3.21791	0.446243		5	1.06536	0.0525821
	1.2715	0.615275	0.429152	-0.642207	-1.88071	-0.570672	-2.91681	0.58356		5	0.98008	0.0117753
	1.73092	0.793263	0.697169	-0.99729	-1.46055	-0.604733	-3.21791	0.520551		5	1.011	0.0211348
	1.35911	0.793386	0.41365	-0.414541	-1.44436	-0.497752	-2.18002	0.241946		5	0.939638	0.00508742
	1.29692	0.547192	0.503792	-1.27436	-1.67543	-0.491222	-2.75898	0.504891		5	0.968193	0.00928225
	0.627569	0.559283	0.439345	-0.288217	-1.8097	-0.10215	-2.89285	0.401251		5	0.976471	0.0109632
	1.1412	0.66957	0.565167	-1.26763	-2.44931	-0.582379	-3.02258	0.588914		5	1.06533	0.0525582
	1.8741	0.410567	0.401329	-0.288217	-1.90002	-0.501047	-3.21791	0.469201		5	1.02154	0.0255131
	0.627569	0.793386	0.59763	-1.28248	-1.44436	-0.604733	-3.0714	0.48549		5	1.01269	0.0217919
	1.23859	0.589461	0.611393	-0.288217	-2.44931	-0.303163	-3.20726	0.347557		5	1.05673	0.0459487
	1.83253	0.771785	0.622851	-1.15918	-2.25013	-0.446	-1.76737	0.436997		6	1.14619	0.169582
	1.38504	0.793386	0.112672	-0.463677	-2.44931	-0.573371	-2.63914	0.491784		5	1.03233	0.0307598
	2.23361	0.482997	0.124854	-0.893642	-1.46234	-0.577255	-3.08478	0.48045		5	1.008	0.0200123
	1.33785	0.549966	0.440605	-0.893128	-2.44931	-0.434679	-3.16699	0.443597		5	1.04641	0.0389145
	1.43559	0.368213	0.162392	-1.21551	-1.85798	-0.58322	-3.10666	0.453005		5	0.997187	0.0163729
	1.47971	0.543301	0.199512	-1.22012	-1.67903	-0.600699	-1.76737	0.482646		5	0.977151	0.0111124
	1.70002	0.6809	0.470864	-0.931658	-2.44931	-0.568182	-3.12384	0.597519		5	1.06636	0.0533979
	1.07208	0.608493	0.465422	-1.01232	-1.51913	-0.14397	-3.12048	0.589046		5	0.957615	0.00746532
	0.778768	0.793386	0.857629	-1.08667	-1.98732	-0.604733	-3.20634	0.201835		5	1.05103	0.0419452
	1.23795	0.415552	0.571518	-1.29717	-1.49618	-0.515924	-2.93179	0.585132		5	0.973271	0.0102843
	0.65803	0.453639	0.491184	-0.856315	-1.7958	-0.283633	-2.02754	0.218523		5	0.959946	0.00783632
	2.25712	0.308308	0.411932	-0.870658	-2.17387	-0.562884	-2.21839	0.572966		5	1.03498	0.0321753
	1.84026	0.6137	0.162392	-1.22152	-1.57575	-0.270777	-3.08872	0.313896		5	0.981831	0.0121876
	1.62202	0.779461	0.42495	-1.29717	-1.60889	-0.220744	-1.76737	0.416513		5	0.973865	0.0104074
	1.20433	0.590191	0.422964	-0.881368	-2.44931	-0.604733	-3.0455	0.454566		5	1.04591	0.0385983
	2.0061	0.792866	0.437449	-1.1332	-1.49496	-0.269565	-2.73619	0.522251		5	0.973609	0.0103542
	1.76786	0.80308	0.416519	-1.01669	-1.45487	-0.590289	-3.10614	0.31771		5	0.991859	0.0147993
	1.62399	0.673905	0.566376	-0.288217	-2.44931	-0.554194	-3.12386	0.454515		5	1.06862	0.0552832
	2.13342	0.554849	0.448975	-0.844654	-2.02145	-0.367468	-2.66112	0.446765		5	1.00695	0.0196286
	0.957594	0.793143	0.443056	-1.29717	-1.55437	-0.191078	-3.21791	0.547953		5	0.991161	0.0146029
	2.08871	0.330936	0.700234	-1.12353	-1.56166	-0.433616	-2.95056	0.266917		5	1.00216	0.0179706
	1.3919	0.792803	0.522737	-1.30432	-2.22334	-0.42464	-3.21739	0.350841		5	1.05012	0.0413358
	2.1139	0.51799	0.778984	-0.863899	-1.77214	-0.457087	-1.76737	0.497565		5	1.01375	0.0222102
	2.01737	0.369939	0.718959	-0.94923	-1.66793	-0.578841	-1.88749	0.254005		5	0.997228	0.0163858
	1.78433	0.598612	0.434931	-0.288217	-1.57899	-0.252305	-3.21791	0.440232		5	0.987736	0.0136724
	1.31834	0.357961	0.23931	-1.0868	-2.44931	-0.594139	-3.06054	0.442927		5	1.04454	0.0377425
	1.68671	0.34481	0.162392	-1.07801	-1.57797	-0.584128	-2.4454	0.450679		5	0.948738	0.00619038
	2.25712	0.693397	0.27225	-0.288217	-1.53012	-0.45889	-2.51452	0.447366		5	0.990801	0.0145026
	1.56443	0.480004	0.286239	-0.844599	-1.45153	-0.582437	-3.19438	0.455715		5	0.973898	0.0104144
	0.579755	0.662197	0.200716	-0.545151	-1.50661	-0.374425	-1.93969	0.440514		5	0.955959	0.00721125
	1.74399	0.534516	0.46351	-1.29717	-2.17817	-0.414172	-3.21791	0.480001		5	1.04668	0.0390889
	2.25712	0.533241	0.579437	-0.990128	-1.45362	-0.294193	-3.21791	0.63212		5	1.01886	0.0243354
	1.38722	0.308308	0.454674	-1.29717	-2.31835	-0.299668	-1.96846	0.488732		5	1.01373	0.0222017
	0.627569	0.672459	0.628789	-0.963559	-2.44931	-0.302687	-3.19497	0.469172		5	1.06924	0.0558079
	0.627569	0.812476	0.592819	-1.07039	-2.00802	-0.0477454	-3.05404	0.321691		5	1.01368	0.0221814
	0.719021	0.499857	0.458764	-0.887654	-1.64466	-0.474037	-2.23133	0.63212		5	0.954858	0.00704657
	0.971949	0.658249	0.456319	-1.05162	-1.54239	-0.591703	-3.21791	0.453457		5	0.99135	0.0146558
	0.752197	0.579455	0.434706	-1.05563	-1.94419	-0.589858	-2.81697	0.452275		5	0.994353	0.0155189
	1.36994	0.321514	0.235674	-1.09701	-1.88308	-0.130928	-3.07183	0.394919		5	0.969588	0.00954861
	0.896595	0.62313	0.256131	-0.288217	-1.44436	-0.0477454	-3.11307	0.201835		5	0.953992	0.00691949
	0.854395	0.732888	0.666728	-1.22768	-1.44953	-0.164981	-2.29203	0.425183		5	0.949319	0.00626757
	2.1089	0.793386	0.654952	-0.965065	-1.56488	-0.314436	-3.09638	0.454494		5	1.01019	0.0208245
	1.05286	0.455211	0.162392	-0.288217	-1.44436	-0.0477454	-3.164	0.472087		5	0.951755	0.00660023
	1.40565	0.492968	0.435625	-0.845083	-1.60809	-0.604733	-3.20732	0.467135		5	0.983315	0.0125469
	0.994495	0.58725	0.703674	-0.378957	-1.88607	-0.604733	-3.21791	0.483645		5	1.02045	0.0250262
	1.59705	0.339627	0.775638	-1.22483	-2.2185	-0.430225	-2.9707	0.389741		5	1.03542	0.032416
	0.928133	0.690022	0.580335	-1.07716	-2.44931	-0.0477454	-3.04487	0.510857		5	1.04526	0.0381893
	2.03301	0.442016	0.231815	-0.288217	-2.59122	-0.581504	-2.34861	0.455035		5	1.06746	0.0543125
	1.40796	0.78359	0.672782	-1.24603	-1.57033	-0.590183	-3.16437	0.293589		5	1.00811	0.020052
	1.76903	0.636502	0.264908	-0.879018	-1.54292	-0.0477454	-2.94189	0.63212		5	0.94996	0.00635356
	1.91325	0.604339	0.778984	-1.18224	-2.44931	-0.478981	-2.70115	0.573138		5	1.06879	0.0554264
	1.30712	0.308308	0.749023	-1.03243	-1.70505	-0.265248	-2.48543	0.63212		5	0.951741	0.00659833
	0.852225	0.494314	0.251531	-1.29717	-1.86663	-0.597759	-2.13072	0.63212		5	0.986144	0.0132575
	1.78048	0.367801	0.364792	-0.800811	-1.87131	-0.422667	-3.21791	0.450131		5	1.00101	0.0175903
	0.739478	0.63025	0.457637	-1.1313	-2.26784	-0.281304	-3.19085	0.366635		5	1.03983	0.0349066
	0.763777	0.2879	0.443167	-1.29717	-1.54705	-0.0747212	-3.06928	0.462948		5	0.971173	0.0098593
	1.53211	0.375015	0.778984	-0.729022	-1.91417	-0.507711	-3.21791	0.479154		5	1.01496	0.0226996
	1.64725	0.330734	0.630148	-1.17825	-1.91187	-0.54373	-1.98607	0.399239		5	0.990988	0.0145546
	0.627569	0.501883	0.477598	-0.908102	-1.89707	-0.395331	-2.96134	0.63212		5	0.994101	0.015445
	1.52569	0.387408	0.755503	-0.971296	-2.44931	-0.469223	-2.84169	0.473723		5	1.04423	0.0375499
	1.11683	0.60914	0.508805	-0.562733	-1.6093	-0.560162	-3.21791	0.54132		5	0.986417	0.0133279
	2.25195	0.369762	0.498964	-1.00109	-2.44931	-0.610457	-3.13074	0.445899		5	1.09615	0.082603
	1.50159	0.788926	0.229944	-1.30159	-1.5182	-0.454522	-2.05031	0.617611		5	0.963283	0.00839561
	0.738611	0.751467	0.397696	-0.919044	-1.44436	-0.536602	-2.08004	0.464992		5	0.955042	0.00707398
	0.718466	0.617401	0.427569	-0.878024	-2.44931	-0.0477454	-1.89279	0.201835		5	1.02749	0.028304
	1.40434	0.535303	0.668075	-1.01871	-1.44436	-0.594622	-2.45816	0.517589		5	0.949578	0.00630215
	1.86666	0.781907	0.479182	-1.01184	-1.99172	-0.140177	-2.62642	0.311047		5	0.988538	0.0138856
	1.43766	0.346401	0.40053	-1.29717	-1.49367	-0.0477454	-2.9685	0.258448		5	0.949183	0.00624942
	1.32131	0.460695	0.441426	-1.0298	-1.50895	-0.516893	-3.21791	0.438951		5	0.976264	0.010918
	0.627569	0.648538	0.59605	-0.534577	-1.46844	-0.0477454	-3.03897	0.441693		5	0.963992	0.00851895
	1.77109	0.328333	0.43698	-0.858768	-1.44695	-0.590768	-2.33238	0.461702		5	0.943801	0.00556825
	1.69238	0.585911	0.450563	-1.19294	-1.57348	-0.59409	-2.54445	0.427475		5	0.965824	0.00884472
	1.72305	0.788647	0.446239	-0.845943	-1.44664	-0.230347	-3.20369	0.201835		5	0.975388	0.0107292
	1.63004	0.541639	0.638478	-1.29717	-1.50539	-0.582993	-3.20925	0.448153		5	1.00855	0.0202133
	1.82975	0.308308	0.429873	-1.01647	-1.50711	-0.604733	-2.95643	0.467661		5	0.977403	0.0111681
	1.29823	0.606985	0.778984	-0.829699	-1.44436	-0.604733	-2.82073	0.63212		5	0.967488	0.00915003
	0.627569	0.644927	0.162392	-0.908155	-1.98075	-0.387986	-2.68641	0.201835		5	0.97925	0.011584
	1.35436	0.440554	0.162392	-0.288217	-1.45453	-0.290577	-2.32498	0.505057		5	0.916979	0.00306296
	0.932131	0.793386	0.778984	-1.13856	-1.54247	-0.330085	-2.27871	0.544233		5	0.964745	0.00865149
	2.25712	0.72804	0.328621	-0.930217	-2.26527	-0.31235	-1.97729	0.511552		6	1.14156	0.160212
	1.08618	0.558462	0.547246	-1.15889	-2.40356	-0.54618	-2.94391	0.469679		5	1.04337	0.0370197
	1.24421	0.308308	0.324773	-0.583898	-1.45111	-0.544241	-2.12433	0.494284		5	0.924376	0.00362545
	1.9962	0.793111	0.519099	-0.832386	-2.44931	-0.551349	-3.1061	0.452749		5	1.08097	0.0664968
	0.707715	0.760688	0.428419	-0.288217	-2.44931	-0.292614	-3.07484	0.640581		5	1.06224	0.050105
	1.06539	0.452316	0.407022	-1.25976	-2.44931	-0.589117	-3.09508	0.501251		5	1.05903	0.0476438
	1.95543	0.742984	0.233971	-1.1363	-1.9959	-0.209997	-3.21791	0.456485		5	1.02862	0.0288623
	1.5439	0.357602	0.475765	-0.896646	-1.92936	-0.0477454	-2.04307	0.532217		5	0.952809	0.00674905
	1.87333	0.320728	0.46496	-0.303173	-2.39743	-0.509244	-2.9626	0.513981		5	1.05241	0.0428884
	1.72124	0.379722	0.308401	-0.657027	-1.61255	-0.370068	-2.9387	0.474942		5	0.95341	0.0068351
	1.76396	0.369472	0.478752	-0.840748	-1.44436	-0.554939	-2.55761	0.63212		5	0.948262	0.00612791
	1.01987	0.743878	0.778984	-0.990669	-1.4895	-0.0477454	-3.18123	0.486946		5	0.977583	0.0112079
	1.56405	0.677851	0.449924	-1.0231	-2.17985	-0.583849	-3.11355	0.24358		5	1.03219	0.0306849
	0.692578	0.581069	0.487536	-0.926326	-2.03937	-0.503001	-2.48673	0.502228		5	0.988993	0.0140079
	2.02668	0.383481	0.291408	-1.29225	-1.44436	-0.449899	-2.27104	0.561256		5	0.968746	0.00938711
	1.41313	0.792928	0.531721	-1.23949	-1.4919	-0.604733	-3.20458	0.602937		5	1.00649	0.0194648
	1.88897	0.510166	0.616051	-0.288217	-1.4765	-0.417363	-3.11658	0.437887		5	0.990899	0.0145299
	1.05649	0.308308	0.490943	-0.834572	-1.74118	-0.5551	-3.08516	0.553578		5	0.978882	0.0115
	2.25712	0.308308	0.326239	-0.651407	-1.54601	-0.0477454	-3.14652	0.201835		5	0.996971	0.0163066
	1.65106	0.746003	0.505802	-1.24024	-1.45675	-0.54664	-2.62977	0.201835		5	0.968356	0.00931304
	1.83752	0.351762	0.413073	-0.396272	-1.45075	-0.506079	-2.97862	0.445963		5	0.968766	0.00939082
	1.11289	0.741682	0.409428	-0.886287	-1.95619	-0.532888	-3.20499	0.569753		5	1.01099	0.0211305
	0.989107	0.595512	0.778984	-0.384262	-1.49695	-0.470955	-3.00246	0.201835		5	0.973701	0.0103733
	1.14694	0.634279	0.405849	-0.840534	-2.38809	-0.372387	-3.1943	0.201835		5	1.03903	0.0344441
	1.43493	0.737594	0.485157	-1.24593	-1.6144	-0.576563	-3.20679	0.625252		5	1.00821	0.0200881
	1.84995	0.793386	0.173263	-0.669675	-1.48646	-0.604733	-2.99538	0.475172		5	0.982957	0.0124594
	0.627569	0.793169	0.446754	-1.29717	-1.49754	-0.0477454	-3.21491	0.402563		5	0.996529	0.0161711
	1.91184	0.78489	0.695048	-0.73777	-1.517	-0.604733	-1.82401	0.442336		5	0.99237	0.0149444
	1.97818	0.506139	0.403564	-0.672358	-1.69046	-0.57978	-3.03003	0.599705		5	0.998584	0.0168087
	2.04744	0.574437	0.415437	-1.06454	-1.46894	-0.598248	-1.76737	0.282894		5	0.990512	0.0144226
	2.25148	0.308308	0.729193	-1.1678	-2.23172	-0.490375	-1.78375	0.42748		6	1.11844	0.11855
	1.72138	0.682476	0.550287	-0.939318	-1.53249	-0.51879	-3.21791	0.201835		5	0.995814	0.0159544
	2.00277	0.557155	0.39637	-0.711544	-1.44436	-0.531327	-2.80736	0.63212		5	0.971338	0.00989224
	0.866785	0.712523	0.640208	-1.29717	-1.55576	-0.554524	-3.14545	0.519023		5	1.00861	0.0202341
	1.35206	0.407582	0.534753	-1.1443	-1.68293	-0.481845	-2.94475	0.269206		5	0.969298	0.00949272
	0.63708	0.36088	0.162392	-1.27031	-2.44931	-0.542751	-3.21791	0.63212		5	1.07744	0.0631216
	0.678327	0.793119	0.458368	-1.29717	-1.49467	-0.297362	-2.24883	0.513848		5	0.965447	0.00877683
	1.31159	0.496084	0.411636	-1.29717	-2.46269	-0.0825346	-3.02321	0.201835		5	1.04133	0.0357894
	2.04795	0.793386	0.778984	-1.07262	-1.71827	-0.57621	-2.42957	0.257965		5	1.01095	0.0211164
	0.627569	0.692154	0.520764	-0.710367	-1.50177	-0.263184	-1.81203	0.401961		5	0.96131	0.00806089
	2.25712	0.489197	0.53324	-1.16602	-2.4155	-0.131445	-2.94795	0.475051		5	1.07364	0.0596482
	2.25712	0.752553	0.599485	-1.29717	-1.45748	-0.604733	-2.35892	0.63212		5	1.01787	0.0239104
	1.85657	0.792962	0.319051	-1.11599	-1.6335	-0.48341	-3.20286	0.63212		5	1.0118	0.0214418
	1.01311	0.332966	0.778984	-1.15395	-2.38766	-0.429626	-2.72637	0.628584		5	1.03854	0.034161
	1.21924	0.528198	0.778984	-0.837615	-2.44931	-0.604733	-2.82698	0.518429		5	1.0477	0.0397443
	1.81026	0.398162	0.24199	-0.581326	-2.15739	-0.0477454	-2.37488	0.488361		5	0.977115	0.0111043
	2.07285	0.370617	0.82456	-1.02212	-1.47375	-0.590766	-3.17984	0.201835		5	1.02607	0.0276182
	2.08499	0.684523	0.453694	-1.01721	-2.03075	-0.302447	-3.10786	0.288103		5	1.03241	0.0308002
	2.25712	0.480138	0.398757	-0.594739	-1.48398	-0.309433	-1.76737	0.584074		5	0.98445	0.0128281
	0.972953	0.793386	0.457683	-1.26167	-2.06281	-0.468021	-1.84639	0.201835		5	1.01194	0.0214964
	1.83998	0.480474	0.304302	-1.27102	-2.26986	0.11893	-2.39092	0.277462		5	1.00845	0.020175
	2.25712	0.439667	0.227394	-1.23107	-1.61471	-0.467689	-2.72159	0.469182		5	1.00156	0.0177709
	1.02777	0.662092	0.298516	-0.442149	-1.56984	-0.604733	-3.05497	0.435429		5	0.97239	0.010104
	1.9155	0.526525	0.447936	-1.22488	-1.55092	-0.604733	-3.21791	0.531269		5	1.01679	0.0234522
	1.89254	0.388428	0.628417	-0.323014	-1.47043	-0.31552	-1.76737	0.483622		5	0.968515	0.00934312
	1.26017	0.598734	0.411611	-1.1932	-1.58374	-0.603357	-3.21791	0.302256		5	0.993749	0.0153419
	1.82165	0.435245	0.490005	-1.2361	-2.0578	-0.604733	-3.21238	0.288079		5	1.0442	0.03753
	2.15526	0.792824	0.462523	-0.71697	-1.58376	-0.0477454	-3.09046	0.477827		5	0.996568	0.0161831
	1.44079	0.457082	0.225747	-0.933772	-1.92912	-0.59463	-3.1947	0.454376		5	1.00149	0.0177454
	1.45015	0.668702	0.479678	-0.288217	-1.80523	-0.593672	-2.14925	0.616174		5	0.975902	0.0108398
	0.627569	0.793386	0.729186	-0.866746	-2.42728	-0.595508	-3.09079	0.445817		5	1.07861	0.0642244
	1.89394	0.697847	0.547	-1.17994	-2.13839	-0.459871	-3.21791	0.477071		5	1.0536	0.0437169
	1.82797	0.459385	0.453061	-0.938521	-1.67476	-0.403092	-3.13929	0.341263		5	0.986738	0.0134111
	2.25712	0.74453	0.505196	-1.29717	-1.7329	-0.090417	-2.77368	0.478095		5	1.01392	0.022278
	2.25712	0.793386	0.674278	-0.86673	-2.12096	-0.347736	-1.76737	0.561283		6	1.10031	0.09174
	0.926552	0.420467	0.349822	-1.29717	-2.08604	-0.325243	-3.08795	0.201835		5	1.0104	0.0209077
	0.627569	0.626468	0.778984	-0.858175	-1.9063	-0.355841	-1.99522	0.496955		5	0.995638	0.0159013
	1.29514	0.478348	0.250328	-1.27095	-1.47127	-0.50121	-1.76737	0.278811		5	0.958839	0.0076582
	1.63457	0.44114	0.778984	-0.665841	-1.48358	-0.437931	-3.06992	0.473011		5	0.974616	0.010565
	1.88517	0.534327	0.690276	-1.05078	-2.04311	-0.604733	-2.92641	0.309909		5	1.02899	0.0290461
	1.77275	0.4493	0.418302	-1.29301	-2.35709	-0.59743	-2.58516	0.482903		5	1.04026	0.0351592
	0.906754	0.468738	0.445581	-0.612363	-2.44931	-0.60384	-2.83621	0.464609		5	1.03492	0.0321402
	0.627569	0.574415	0.693188	-1.2189	-1.51284	-0.563301	-3.16161	0.201835		5	1.01208	0.0215538
	2.25305	0.552278	0.422851	-1.072	-2.38914	-0.45363	-2.01866	0.199654		6	1.17246	0.22918
	0.325022	0.66104	0.544118	-1.035	-1.5602	-0.382966	-3.10253	0.612328		5	1.01374	0.0222082
	1.60064	0.793386	0.212782	-0.398141	-1.44436	-0.261356	-3.01833	0.458958		5	0.955576	0.0071537
	1.30941	0.378894	0.331253	-1.23053	-1.45701	-0.432691	-3.09124	0.448115		5	0.963876	0.00849866
	2.25712	0.766116	0.162392	-1.11706	-1.46271	-0.494578	-3.06967	0.297256		5	1.01802	0.0239737
	1.89469	0.800298	0.249273	-0.965705	-2.05174	-0.393229	-3.08327	0.483686		5	1.02327	0.0262987
	1.67799	0.494794	0.454538	-1.02301	-1.5912	-0.271721	-3.21215	0.504747		5	0.978825	0.0114872
	0.627569	0.707273	0.162392	-0.917715	-2.44931	-0.596178	-2.12785	0.456492		5	1.0407	0.0354159
	0.777202	0.603601	0.246382	-0.288217	-1.54369	-0.351852	-3.16815	0.450781		5	0.97786	0.0112696
	1.13851	0.792769	0.719332	-0.906828	-1.46255	-0.447575	-3.0411	0.503799		5	0.973841	0.0104025
	1.04198	0.793029	0.674764	-1.13643	-1.69926	-0.531963	-2.53255	0.424754		5	0.974809	0.0106059
	0.734711	0.677245	0.251428	-1.08907	-1.59249	-0.51532	-1.76737	0.606897		5	0.97952	0.0116458
	1.86811	0.380446	0.401547	-0.861243	-1.51644	-0.344908	-3.21791	0.592234		5	0.983513	0.0125956
	1.5655	0.719187	0.162392	-0.476673	-1.44796	-0.577026	-2.93956	0.354498		5	0.960362	0.00790424
	2.06274	0.380515	0.609397	-0.839343	-2.43969	-0.542496	-2.88971	0.63212		5	1.06797	0.054738
	1.03438	0.714804	0.492358	-0.816967	-1.44436	-0.338599	-3.20686	0.287897		5	0.965548	0.00879498
	2.25712	0.361985	0.7526	-0.442873	-1.58669	-0.411178	-3.19967	0.430607		5	1.0309	0.0300165
	2.25712	0.672745	0.46248	-1.14752	-1.80388	-0.541138	-3.09129	0.334002		5	1.04237	0.0364146
	2.13942	0.435194	0.778984	-0.600614	-1.90605	-0.434789	-1.76737	0.224794		6	1.10781	0.10223
	1.66912	0.354435	0.778984	-0.910835	-1.44498	-0.211156	-2.79626	0.588563		5	0.950045	0.00636507
	1.28466	0.793386	0.646833	-0.960724	-1.49413	-0.0477454	-2.84747	0.614008		5	0.946949	0.00595818
	2.25712	0.308308	0.326632	-0.80249	-1.95468	-0.401926	-3.00246	0.291347		5	1.02412	0.0266945
	1.4293	0.341717	0.388611	-0.88625	-1.44904	-0.614184	-3.22817	0.482416		5	0.97739	0.0111651
	0.781209	0.793386	0.282367	-0.782394	-2.26611	-0.506026	-2.68828	0.452368		5	1.0136	0.0221493
	1.65139	0.792865	0.227718	-0.838402	-1.44436	-0.604733	-2.58955	0.63212		5	0.954816	0.00704039
	2.16187	0.308308	0.646517	-0.881968	-1.79587	-0.46655	-1.76737	0.497602		5	1.01091	0.0211018
	2.06155	0.531808	0.615541	-0.833588	-2.0021	-0.322874	-1.99532	0.446628		5	1.00318	0.0183125
	0.934281	0.657474	0.406023	-1.27267	-2.17975	-0.204531	-2.99277	0.471191		5	1.01468	0.0225838
	2.25712	0.777002	0.401629	-0.556203	-1.49799	-0.0477454	-2.99117	0.561499		5	0.993622	0.0153049
	0.618345	0.793386	0.239459	-1.23244	-1.82642	-0.390987	-2.14186	0.499316		5	0.986272	0.0132904
	2.25712	0.308308	0.661063	-0.238484	-1.8541	-0.582872	-2.58282	0.431289		5	1.0267	0.0279184
	2.17689	0.56295	0.437479	-0.291257	-2.44931	-0.55102	-2.04778	0.453062		5	1.06829	0.0549994
	1.05298	0.79185	0.415877	-1.29717	-1.74045	-0.604733	-2.84473	0.437347		5	0.991602	0.0147266
	2.24035	0.793386	0.778984	-0.904729	-1.44436	-0.604733	-3.19049	0.613514		5	1.04479	0.0378944
	2.25712	0.610002	0.651568	-1.12261	-2.23703	-0.582561	-3.09491	0.481537		5	1.08406	0.0695614
	1.162	0.601093	0.737101	-0.988604	-1.48732	-0.604733	-2.94741	0.491221		5	0.974501	0.0105407
	1.80447	0.354006	0.584054	-0.653663	-1.44436	-0.604733	-2.24886	0.530364		5	0.952444	0.00669712
	0.896774	0.541063	0.438184	-1.14317	-1.93664	-0.463137	-3.15383	0.63212		5	1.00974	0.0206552
	2.16014	0.588723	0.405971	-0.836777	-1.45742	-0.526168	-2.83684	0.201835		5	0.986411	0.0133261
	1.22789	0.648789	0.30803	-1.20713	-2.44931	-0.137682	-1.76737	0.610582		5	1.03405	0.0316704
	0.944701	0.611477	0.432844	-0.288217	-1.97496	-0.589091	-3.09719	0.484325		5	1.01179	0.0214403
	1.61879	0.706067	0.379649	-0.288217	-1.44436	-0.489987	-2.62602	0.40434		5	0.948549	0.00616544
	1.90022	0.793081	0.731599	-0.474455	-1.62005	-0.0535662	-2.09353	0.453966		5	0.966715	0.0090071
	1.33713	0.793386	0.54439	-0.712681	-2.04451	-0.390567	-3.21822	0.201835		5	1.01575	0.0230222
	0.627569	0.50277	0.580353	-0.848913	-1.98309	-0.458936	-3.08154	0.201835		5	1.01086	0.0210829
	0.627569	0.71243	0.187904	-0.827706	-1.44436	-0.364478	-3.21521	0.497103		5	0.980961	0.0119812
	1.94517	0.384917	0.507646	-0.815823	-1.95685	-0.480204	-3.17072	0.55584		5	1.02192	0.0256866
	0.635843	0.517168	0.608378	-1.1218	-1.44436	-0.392054	-1.76737	0.623144		5	0.980093	0.0117783
	1.87284	0.324769	0.737493	-1.27234	-1.5203	-0.168106	-2.96368	0.560073		5	0.986313	0.0133009
	1.60015	0.610541	0.459204	-0.8945	-2.44931	-0.351757	-2.45928	0.44942		5	1.02011	0.0248784
	1.40693	0.484916	0.735885	-0.910019	-2.2773	-0.403469	-1.76737	0.466477		5	1.02154	0.0255127
	1.16756	0.406928	0.409137	-0.409097	-1.57561	-0.604733	-3.14052	0.45981		5	0.975581	0.0107706
	1.49068	0.532748	0.675096	-0.815917	-1.60314	-0.48985	-3.08261	0.569999		5	0.978475	0.0114078
	1.33218	0.793082	0.708211	-1.16308	-1.9178	-0.581205	-2.99553	0.509726		5	1.01666	0.0233997
	0.627569	0.751012	0.592687	-0.856305	-1.7731	-0.498625	-2.96182	0.63212		5	1.00153	0.0177587
	1.67672	0.443754	0.681656	-0.288217	-1.45662	-0.574027	-1.76737	0.496879		5	0.97656	0.0109826
	1.37014	0.308308	0.48185	-1.15483	-1.52068	-0.566275	-2.96899	0.502785		5	0.967102	0.0090784
	1.83576	0.792858	0.566294	-0.288217	-1.46613	-0.590823	-2.24838	0.466325		5	0.973825	0.010399
	1.69916	0.308308	0.621505	-0.55722	-1.60393	-0.591719	-2.56093	0.439633		5	0.958144	0.00754819
	0.960615	0.770812	0.425666	-1.02232	-1.58794	-0.0477454	-1.76737	0.481834		5	0.95346	0.00684228
	1.86901	0.790446	0.376191	-0.693385	-2.15793	-0.330672	-3.21791	0.201835		5	1.03804	0.0338752
	0.908723	0.364622	0.778984	-1.2672	-2.43497	-0.574696	-2.65149	0.471234		5	1.05303	0.0433208
	1.58185	0.427515	0.331202	-0.677178	-1.46078	-0.585255	-3.14166	0.301265		5	0.968588	0.00935691
	1.61504	0.793386	0.516529	-1.29717	-2.21888	-0.604733	-1.96746	0.487124		5	1.0367	0.0331213
	1.02233	0.611388	0.468192	-0.838051	-1.69321	-0.0477454	-3.05512	0.443196		5	0.954083	0.00693277
	1.55718	0.655039	0.542131	-0.479193	-1.5376	-0.184294	-3.14635	0.397433		5	0.964663	0.00863701
	1.20579	0.778389	0.594742	-1.08052	-1.5404	-0.0477454	-3.21791	0.430558		5	0.975152	0.0106788
	0.727133	0.486988	0.393567	-1.02046	-1.44436	-0.424261	-3.2117	0.484059		5	0.979111	0.0115523
	2.06767	0.308308	0.466196	-0.90463	-2.09777	-0.391356	-2.13646	0.544081		5	1.00594	0.0192709
	2.25712	0.308308	0.754812	-1.03797	-1.55512	-0.604733	-3.20707	0.485127		5	1.04338	0.0370255
	1.52485	0.728468	0.413513	-1.23896	-2.27008	-0.713307	-1.76737	0.494129		5	1.04585	0.0385622
	1.45345	0.792823	0.593644	-1.03465	-1.74242	-0.486702	-3.06757	0.451549		5	0.993226	0.0151901
	1.8634	0.692379	0.204442	-0.444716	-2.59737	-0.580925	-2.62074	0.473517		5	1.0636	0.0511732
	0.891462	0.527208	0.369531	-0.913874	-2.18535	-0.597017	-2.83265	0.462885		5	1.0058	0.0192192
	2.37214	0.792928	0.197115	-0.587408	-1.54648	-0.580072	-2.45656	0.631076		5	1.0082	0.0200847
	0.997208	0.523459	0.778984	-0.956767	-1.46665	-0.365266	-1.76737	0.63212		5	0.966399	0.00894926
	1.91898	0.341517	0.436445	-1.26237	-1.47788	-0.217868	-2.93465	0.489867		5	0.971637	0.00995195
	2.09692	0.764319	0.577512	-0.135145	-1.57187	-0.380049	-3.07506	0.409075		5	1.01838	0.0241289
	1.14154	0.792876	0.666528	-0.927205	-1.46841	-0.210584	-2.2952	0.366869		5	0.931837	0.00428503
	0.894553	0.793386	0.423178	-0.603737	-1.55281	-0.0477454	-3.10189	0.523051		5	0.960005	0.00784595
	2.25712	0.769521	0.669506	-0.569363	-1.94078	-0.604733	-1.80445	0.201835		6	1.12833	0.135334
	1.68498	0.616739	0.457271	-0.644612	-2.32165	-0.528557	-3.12611	0.439833		5	1.04294	0.0367582
	1.69674	0.767556	0.589868	-0.860188	-1.5663	-0.351321	-2.19102	0.441145		5	0.949339	0.00627025
	1.53871	0.704341	0.453747	-1.24932	-1.58579	-0.604115	-3.08547	0.493306		5	0.996397	0.0161309
	1.50051	0.716529	0.267731	-1.38592	-1.44436	-0.255122	-3.21197	0.201835		5	0.985936	0.0132041
	1.67908	0.388167	0.440829	-0.287445	-1.75633	-0.526139	-3.19376	0.501691		5	1.00183	0.0178578
	0.83287	0.476642	0.532003	-0.288217	-1.64834	-0.0477454	-2.96745	0.442843		5	0.960009	0.00784663
	0.866191	0.450928	0.659552	-0.53306	-1.44436	-0.0477454	-2.1046	0.501239		5	0.927334	0.00387521
	1.31097	0.749561	0.220784	-0.644306	-1.77011	-0.448783	-2.18362	0.45433		5	0.94621	0.00586452
	0.788002	0.697312	0.434064	-0.87954	-1.44436	-0.603678	-2.91478	0.517799		5	0.968025	0.00925052
	1.69712	0.40706	0.491487	-1.01741	-1.46734	-0.581913	-2.37754	0.574217		5	0.949279	0.00626214
	0.627569	0.308308	0.633707	-1.0753	-1.5044	-0.244175	-3.17472	0.63212		5	0.990421	0.0143974
	1.68166	0.308308	0.416973	-1.23387	-1.62273	-0.0477454	-1.76737	0.63212		5	0.960974	0.00800501
	1.61843	0.793386	0.498132	-0.904267	-1.69911	-0.579132	-2.81289	0.496826		5	0.97855	0.0114248
	1.92733	0.395065	0.420331	-0.462879	-2.01055	-0.41276	-1.76737	0.491067		5	1.00135	0.0177022
	1.72966	0.775188	0.491768	-1.10743	-1.60776	-0.349327	-2.20968	0.311615		5	0.957491	0.00744603
	1.18574	0.562185	0.5521	-1.21806	-1.53144	-0.490495	-3.79589	0.63212		5	1.05714	0.046247
	1.42628	0.792837	0.471501	-1.07542	-1.76909	-0.530125	-3.12525	0.21787		5	0.998543	0.0167958
	1.63561	0.44005	0.778984	-1.144	-1.55252	-0.535638	-3.05382	0.613673		5	0.996435	0.0161427
	2.20211	0.631893	0.421154	-1.24064	-1.49773	-0.472654	-2.63504	0.224473		5	0.995783	0.015945
	1.50265	0.792895	0.492879	-0.992357	-1.6448	-0.334255	-2.9334	0.536504		5	0.966517	0.00897081
	2.25712	0.631272	0.409565	-0.269633	-2.22341	-0.600885	-2.14822	0.510609		5	1.05398	0.0439839
	2.25712	0.73105	0.298174	-1.21703	-1.88427	-0.371062	-1.76737	0.545534		6	1.10321	0.0957008
	1.673	0.462084	0.415763	-0.82698	-1.45914	-0.343681	-3.1483	0.237823		5	0.961944	0.00816709
	2.25712	0.432379	0.564261	-0.846478	-1.8944	-0.604733	-3.03157	0.404165		5	1.03876	0.0342868
	1.28678	0.308308	0.778984	-0.616112	-1.45585	-0.526188	-3.21436	0.480933		5	0.983156	0.0125081
	1.95974	0.793144	0.162392	-0.914496	-1.80235	-0.567729	-3.14761	0.31201		5	1.01869	0.0242612
	1.69896	0.793386	0.265639	-0.86414	-1.62962	-0.302526	-1.76737	0.403023		5	0.960523	0.00793069
	0.627569	0.777303	0.44638	-0.634713	-2.12668	-0.432202	-3.17203	0.63316		5	1.037	0.0332894
	0.627569	0.494635	0.682004	-1.05766	-1.49477	-0.598939	-3.2058	0.439994		5	1.00836	0.0201418
	1.92134	0.308308	0.753549	-0.288217	-1.55427	-0.25332	-3.1612	0.441579		5	0.999207	0.0170062
	0.719024	0.308308	0.408842	-0.835422	-1.44436	-0.551161	-1.76737	0.450414		5	0.960751	0.00796823
	1.36002	0.389242	0.162392	-0.954339	-1.5455	-0.0477454	-3.013	0.372272		5	0.932534	0.00435176
	0.975101	0.350932	0.778984	-1.29717	-1.62294	-0.0477454	-1.80905	0.63212		5	0.977502	0.0111899
	0.934494	0.39512	0.346336	-0.921599	-2.18442	-0.518159	-1.76737	0.574432		5	1.00405	0.0186107
	1.52901	0.734133	0.657806	-1.17584	-2.11432	-0.583003	-3.21791	0.451918		5	1.04783	0.0398291
	1.56252	0.792892	0.162392	-0.85487	-2.44931	-0.532127	-3.21247	0.462903		5	1.06248	0.0502927
	2.14176	0.709498	0.0328076	-1.2142	-1.46038	-0.518815	-3.19705	0.611807		5	1.02481	0.0270191
	0.984153	0.619552	0.521408	-0.854679	-1.80167	-0.430572	-3.21281	0.558774		5	0.994396	0.0155315
	1.86286	0.792912	0.747221	-0.946856	-1.82559	-0.538708	-2.43199	0.49611		5	0.998615	0.0168185
	1.02268	0.308308	0.726164	-1.11837	-1.69769	-0.372275	-2.82695	0.511938		5	0.96859	0.00935729
	1.01554	0.308308	0.778984	-1.0028	-2.44931	-0.229861	-3.2097	0.47486		5	1.05841	0.0471851
	1.02812	0.792838	0.490581	-1.21478	-1.44436	-0.589559	-3.13189	0.201835		5	0.991973	0.0148315
	1.47979	0.53879	0.448832	-1.34854	-1.44436	-0.54218	-2.97092	0.464014		5	0.976702	0.0110136
	1.52913	0.431451	0.42379	-0.856123	-1.87346	-0.574342	-3.09105	0.201835		5	0.991449	0.0146836
	1.37192	0.358969	0.22734	-0.288217	-1.68267	-0.36956	-3.11471	0.537689		5	0.970043	0.00963687
	1.07622	0.394101	0.422427	-0.508281	-2.21607	-0.418875	-3.15765	0.455233		5	1.01623	0.0232215
	1.26081	0.792786	0.400372	-0.291661	-1.63775	-0.435338	-3.12768	0.348055		5	0.981871	0.0121971
	1.66599	0.475311	0.541766	-0.972649	-1.49926	-0.259436	-3.20616	0.408063		5	0.972263	0.0100783
	1.57675	0.556203	0.446356	-0.575123	-1.94405	-0.379285	-3.21297	0.50239		5	1.00138	0.0177107
	1.77148	0.518341	0.42086	-1.14454	-1.45066	-0.450505	-2.89989	0.435849		5	0.964044	0.00852798
	1.67191	0.39025	0.44654	-1.16986	-1.45908	-0.509081	-2.04838	0.476749		5	0.951001	0.00649567
	1.91326	0.611494	0.32992	-0.848439	-2.24589	-0.577832	-2.98402	0.467836		5	1.03785	0.0337672
	1.80072	0.308308	0.539567	-1.29717	-1.85393	-0.463099	-1.76737	0.456358		5	1.00204	0.0179284
	2.00343	0.44811	0.453731	-0.997068	-1.79809	-0.0477454	-3.20797	0.462769		5	1.00361	0.0184597
	0.944346	0.696991	0.778984	-1.18867	-1.89558	-0.580663	-3.14829	0.26006		5	1.02818	0.0286453
	1.97112	0.792925	0.233225	-0.861175	-2.03057	-0.573493	-3.1952	0.43807		5	1.04064	0.0353807
	1.05476	0.389342	0.565934	-1.2676	-2.37599	-0.306114	-3.04235	0.59981		5	1.04226	0.0363482
	1.63282	0.722198	0.625063	-1.0632	-1.57431	-0.531423	-2.75578	0.311345		5	0.971143	0.00985338
	0.891947	0.79325	0.313215	-0.46761	-1.53159	-0.564303	-3.2045	0.496808		5	0.989984	0.0142771
	1.81538	0.69283	0.39615	-1.29717	-1.44436	-0.315934	-2.97827	0.63212		5	0.980835	0.0119515
	2.17945	0.793386	0.343378	-1.14374	-2.44931	-0.496982	-3.16419	0.63212		5	1.1001	0.0872496
	2.00205	0.669579	0.420171	-0.450692	-2.06144	-0.576631	-3.21322	0.459914		5	1.04697	0.0392716
	1.3585	0.620336	0.162392	-0.941751	-1.70748	-0.589414	-3.08069	0.508041		5	0.978425	0.0113965
	1.61021	0.679435	0.425268	-0.748139	-1.65364	-0.0497971	-2.6969	0.223987		5	0.93544	0.00464036
	1.96646	0.645281	0.498197	-1.21908	-2.10281	-0.322962	-3.20995	0.38919		5	1.04651	0.0389795
	1.52926	0.326642	0.162392	-0.744099	-1.81482	-0.588262	-3.07069	0.49923		5	0.980736	0.0119284
	0.766719	0.416514	0.613498	-1.05767	-2.44931	-0.0477454	-3.21791	0.434725		5	1.05667	0.0459081
	1.76334	0.464992	0.438894	-0.288217	-2.21013	-0.531097	-3.0343	0.398338		5	1.03222	0.030703
	0.857843	0.369157	0.533143	-0.844696	-1.50113	-0.570809	-2.94493	0.63212		5	0.965982	0.0088733
	0.627569	0.661942	0.458119	-0.722939	-1.44754	-0.327377	-2.61886	0.63212		5	0.947597	0.00604136
	2.21506	0.462495	0.369959	-0.84076	-1.52471	-0.586704	-3.16448	0.558178		5	1.01749	0.0237502
	1.34498	0.792874	0.226807	-0.946185	-1.52237	-0.27341	-3.09907	0.297118		5	0.956431	0.00728285
	2.25712	0.792808	0.435088	-0.254114	-1.46343	-0.494891	-3.20533	0.492521		5	1.03401	0.0316501
	2.12432	0.482149	0.412092	-1.26262	-1.64909	-0.536915	-3.1324	0.498422		5	1.02524	0.0272185
	1.76895	0.577007	0.654275	-0.61363	-2.44931	-0.426606	-2.49297	0.47528		5	1.03605	0.0327628
	1.70822	0.51303	0.562249	-0.901175	-1.58241	-0.604733	-3.08472	0.44814		5	0.986744	0.0134126
	0.770054	0.681692	0.263268	-0.503108	-2.2658	-0.411133	-3.09785	0.565926		5	1.03052	0.0298191
	1.24534	0.618361	0.442651	-1.04567	-1.46024	-0.225695	-3.26561	0.478509		5	0.968151	0.00927427
	0.861924	0.405251	0.265401	-1.12659	-1.90309	-0.381215	-3.09243	0.568228		5	0.99077	0.0144941
	2.0403	0.501663	0.778984	-1.08038	-1.85432	-0.0477454	-2.89366	0.464645		5	1.00608	0.0193178
	0.983088	0.793386	0.548651	-0.977649	-1.79098	-0.574818	-2.50741	0.28862		5	0.972025	0.0100301
	0.926502	0.529573	0.674672	-0.940045	-2.1079	-0.573714	-2.99713	0.214889		5	1.01708	0.0235742
	1.68578	0.780477	0.690118	-0.838137	-1.69718	-0.44713	-2.55864	0.37263		5	0.969046	0.00944438
	0.586483	0.334064	0.115435	-1.2253	-1.52697	-0.558163	-2.6597	0.248063		5	0.966984	0.00905658
	1.77165	0.47162	0.52573	-0.823217	-1.55111	-0.258433	-2.7401	0.511772		5	0.943601	0.00554424
	0.627569	0.688521	0.464657	-0.854369	-1.44436	-0.400465	-2.76703	0.379183		5	0.952851	0.00675491
	0.627569	0.517266	0.461354	-0.669725	-1.45959	-0.58857	-3.09287	0.357795		5	0.980548	0.0118843
	1.32191	0.366857	0.623991	-0.862397	-2.16651	-0.59851	-2.68295	0.201835		5	0.999264	0.0170244
	1.99228	0.534395	0.558655	-0.633903	-1.87291	-0.499784	-3.15344	0.52539		5	1.02072	0.0251457
	0.627569	0.673862	0.613013	-0.81441	-1.82318	-0.507487	-3.21791	0.201835		5	1.01704	0.0235583
	1.43399	0.366603	0.418015	-1.04273	-1.84634	-0.49793	-2.92367	0.63212		5	0.977788	0.0112537
	0.695285	0.55264	0.778984	-1.13142	-1.9835	-0.22129	-3.13519	0.235491		5	1.02129	0.0254018
	1.50726	0.453355	0.406015	-0.227714	-1.76662	-0.560287	-3.21791	0.409298		5	1.00212	0.0179567
	1.03418	0.323024	0.493719	-0.288217	-1.53926	-0.599893	-3.09913	0.461212		5	0.978339	0.0113772
	1.57607	0.627984	0.411305	-0.964251	-2.44931	-0.604733	-1.87865	0.341312		5	1.04036	0.0352179
	2.25712	0.764268	0.573596	-1.19707	-1.64167	-0.0477454	-3.20734	0.45694		5	1.03232	0.030753
	1.34493	0.538607	0.608972	-0.288217	-1.66668	-0.489883	-3.1797	0.618202		5	0.994167	0.0154641
	2.25712	0.793065	0.160932	-1.29717	-1.91275	-0.415052	-2.10918	0.458352		5	1.02721	0.0281683
	2.25712	0.793386	0.546541	-1.25716	-1.48954	0.0724997	-3.21791	0.242298		5	1.02784	0.0284783
	0.627569	0.743123	0.355397	-1.29717	-1.45646	-0.604733	-3.12636	0.475307		5	1.00833	0.0201332
	1.73894	0.701076	0.544057	-1.23805	-1.45363	-0.59667	-3.21507	0.450748		5	1.00944	0.0205458
	0.627569	0.793386	0.441016	-0.861953	-1.90009	-0.302751	-2.91142	0.350661		5	0.989269	0.0140825
	1.52132	0.650465	0.44366	-1.29717	-1.46179	-0.43331	-3.11699	0.542112		5	0.98337	0.0125605
	1.57877	0.643853	0.778984	-1.00607	-1.47411	-0.191917	-2.44778	0.648229		5	0.945708	0.00580167
	0.627569	0.37175	0.524951	-1.04711	-1.49448	-0.587303	-2.99325	0.439634		5	0.982447	0.0123358
	0.627569	0.793295	0.400695	-1.07435	-1.83925	-0.452282	-2.05809	0.447719		5	0.987108	0.0135073
	2.11735	0.65759	0.719599	-0.878937	-1.53509	-0.602071	-2.99241	0.46768		5	1.01396	0.0222968
	1.42789	0.459445	0.542627	-0.889643	-1.98955	-0.541418	-2.3967	0.63212		5	0.975302	0.0107108
	1.25888	0.582811	0.778984	-1.05481	-2.41393	-0.277899	-1.97873	0.502118		5	1.03144	0.0302933
	2.03393	0.328493	0.366826	-0.851775	-1.55167	-0.604733	-3.2041	0.266999		5	1.0068	0.0195763
	1.76113	0.723183	0.460186	0.138388	-1.72158	-0.458196	-3.06989	0.201835		5	1.02387	0.0265771
	1.54447	0.749366	0.755851	-0.740665	-2.08136	-0.53298	-1.76737	0.482182		5	1.01814	0.0240227
	1.03595	0.687701	0.446814	-1.08221	-1.89676	-0.47864	-3.21791	0.63212		5	1.01135	0.0212687
	1.51703	0.706638	0.778984	-0.896229	-1.76861	-0.0477454	-2.33188	0.604026		5	0.95832	0.0075759
	0.798376	0.79327	0.435657	-0.650156	-2.16835	-0.492224	-3.09592	0.360645		5	1.02596	0.0275639
	1.45229	0.308017	0.494198	-0.312232	-1.51368	-0.40801	-2.00861	0.539414		5	0.939416	0.00506281
	1.62375	0.792919	0.443863	-0.929353	-1.91144	-0.648721	-3.05801	0.543165		5	1.01377	0.0222206
	1.28517	0.754168	0.48076	-0.612571	-1.91284	-0.473795	-3.20443	0.475578		5	1.00334	0.018368
	1.20028	0.369781	0.439736	-0.58646	-1.45984	-0.501092	-1.76737	0.451639		5	0.942696	0.00543679
	1.79687	0.724175	0.607631	-0.34877	-1.46836	-0.587481	-2.22128	0.435572		5	0.967521	0.00915627
	1.84353	0.769318	0.320746	-1.09467	-1.51566	-0.442902	-2.11743	0.401201		5	0.959824	0.00781661
	2.07066	0.483191	0.424106	-1.29717	-1.68636	-0.0477454	-1.76737	0.350879		6	1.10296	0.0953424
	1.85931	0.325062	0.482497	-0.332073	-2.44931	-0.160133	-2.12215	0.63212		5	1.03195	0.0305604
	0.627569	0.719497	0.72624	-0.575083	-2.44931	-0.536862	-3.09476	0.414133		5	1.07477	0.0606641
	2.05945	0.615746	0.162392	-0.934842	-1.62018	-0.45939	-3.21791	0.571129		5	1.00991	0.0207201
	1.33557	0.744555	0.697718	-0.587446	-1.67444	-0.368902	-2.02222	0.450763		5	0.956173	0.00724371
	1.61556	0.403847	0.642428	-0.996478	-1.45728	-0.231593	-1.78806	0.446257		5	0.947337	0.00600794
	0.996192	0.298415	0.598272	-0.318528	-1.54893	-0.452881	-2.81928	0.474319		5	0.953892	0.00690493
	0.627569	0.543308	0.395017	-0.923475	-2.14996	-0.600781	-3.21791	0.556963		5	1.04233	0.0363906
	0.912419	0.361262	0.477449	-1.06	-2.37266	-0.597363	-3.21791	0.607114		5	1.05782	0.0467509
	0.627569	0.736101	0.739042	-1.24318	-1.5377	-0.580926	-2.14099	0.63212		5	0.998853	0.0168938
	0.627569	0.346072	0.439632	-1.29717	-2.09119	-0.35605	-3.07081	0.201835		5	1.02485	0.0270353
	1.15299	0.38336	0.257459	-0.288217	-2.51538	-0.604733	-2.9848	0.507584		5	1.05031	0.0414649
	1.07766	0.793386	0.493697	-1.04907	-1.5499	-0.513272	-2.64705	0.441168		5	0.95448	0.00699092
	1.64208	0.445272	0.778984	-1.14234	-1.51978	-0.511623	-3.0622	0.292557		5	0.990757	0.0144905

## Sheet: Dox
	Simulated Signatures									Algorithm output					correction prediction:
shRNA's:	p53	Chk2	ATR	Chk1	ATX	DNAPKcs	Bok	Bim		class	LR	p-value			1 = TopoII Poison
	4.2127	3.96564	1.2337	-0.394237	-1.09548	-1.28357	-0.93729	1.58851		1	1.17989	0.00598332
	4.26251	3.5485	1.41483	-0.491099	-2.19386	-1.11096	-1.26621	1.09616		1	1.08472	0.0003896
	3.3209	3.62417	1.74865	-0.481289	-1.56883	-0.978737	-1.51359	1.28584		1	1.04712	0.000110064			100% correct classification
	4.51227	4.0259	1.08293	-0.532569	-1.03514	-1.35739	-1.41439	1.43363		1	1.28224	0.0545455
	3.81668	3.69982	1.49866	-0.321201	-1.87657	-1.10137	-1.6231	0.965986		1	1.09058	0.000469934
	2.96026	4.03775	1.46433	-0.604341	-1.30837	-0.670402	-1.75339	1.59496		1	1.18787	0.00730037
	3.15206	3.34075	1.60966	-0.604376	-1.85387	-1.07794	-1.85461	1.11247		1	1.0672	0.000219037
	3.40611	3.89873	1.08195	-0.553157	-1.06883	-1.57846	-1.21004	1.79124		1	1.15251	0.00291826					Experimental Data
	4.52973	3.87172	1.17538	-0.630068	-1.84524	-1.58773	-1.19195	1.32601		1	1.19298	0.00827221				shRNA's:	p53	Chk2	ATR	Chk1	ATX	DNAPKcs	Bok	Bim
	4.38059	3.11418	0.942249	-0.579072	-1.84269	-1.14096	-1.4533	0.921537		1	1.13242	0.00166476			Replicates	1	3.60839	3.84758	1.48554	-0.606583	-2.01168	-0.985583	-0.839267	1.51548
	3.14257	3.67867	1.27916	-0.524092	-0.884953	-1.12722	-0.945874	1.70589		1	1.09178	0.000488259				2	3.16651	3.31814	1.27385	-0.408993	-1.60781	-1.07871	-0.980775	1.02093
	4.84745	3.60522	1.49705	-0.540061	-1.29521	-1.09517	-1.09097	1.88522		1	1.26021	0.036059				3	4.10977	3.84127	1.27511	-0.927964	-1.72819	-1.5891	-1.06116	1.509
	4.92467	3.66925	1.08257	-0.602266	-0.988472	-1.35395	-0.864226	1.83581		1	1.31028	0.088072				4	4.34083	3.98457	1.61813	-0.762108	-1.5999	-1.14906	-1.85461	1.60586
	3.71829	3.94969	1.13988	-0.344478	-1.33207	-1.22616	-1.28078	1.54977		1	1.11972	0.00114946				5	3.44659	3.86095	1.29649	-0.648592	-1.25118	-1.08588	-0.998306	1.29578
	4.1716	3.22905	1.18911	-0.554966	-1.37107	-0.882032	-1.1613	1.64837		1	1.09667	0.000569566				6	3.25818	3.42181	1.22761	-0.685412	-1.20819	-0.887326	-1.2761	1.02785
	3.02837	4.05462	1.31497	-0.609618	-1.48715	-1.04269	-0.982166	1.89621		1	1.09393	0.000522511				7	3.05087	3.54727	1.1238	-0.583731	-1.37367	-0.886576	-0.976502	1.12415
	3.53867	3.97573	1.50549	-0.579633	-1.93766	-1.18211	-1.21006	1.70609		1	1.07021	0.000242228				8	4.23447	3.60448	1.76725	-0.741691	-1.55264	-1.45384	-1.22391	1.40468
	4.20225	3.59572	1.26101	-0.801826	-1.34891	-0.891626	-1.06657	1.22959		1	1.11258	0.000928783				9	3.40957	3.5932	1.05013	-0.567306	-1.48997	-1.11992	-1.16542	1.29038
	4.16521	3.57344	1.25519	-0.594454	-1.3727	-1.58051	-0.648819	1.50372		1	1.09121	0.000479416				10	4.96318	3.76441	1.73976	-0.467558	-1.5295	-1.56655	-1.51802	0.874469
	4.47147	3.77301	1.81274	-0.636018	-0.897561	-1.39295	-1.50976	1.02258		1	1.27049	0.0439225				11	3.14906	3.18752	1.19048	-0.489551	-1.71435	-1.35784	-0.982184	0.997217
	3.73198	3.82297	1.68976	-0.644553	-1.78133	-0.800214	-1.1484	1.36016		1	1.05076	0.000124967				12	3.05888	3.35518	1.05237	-0.415991	-2.02512	-1.56944	-1.45314	1.34595
	2.8346	3.88535	1.46222	-0.412982	-1.50226	-1.33639	-1.04254	1.61323		1	1.04418	9.9289e-05				13	4.00981	3.76468	1.45631	-0.233058	-1.22277	-0.670402	-1.5713	2.00625
	4.34826	3.83691	0.970551	-0.816642	-1.04311	-1.16664	-1.16944	1.52889		1	1.22653	0.0179477				14	4.15649	3.88842	1.31068	-0.297707	-1.35309	-1.11384	-1.13907	1.57574
	4.4275	3.46654	1.35885	-0.437381	-1.69918	-1.1363	-1.49403	0.951222		1	1.1462	0.00245417				15	4.62982	4.04231	1.4296	-0.618885	-0.941633	-1.13311	-1.31262	1.69248
	3.66945	3.58698	1.16933	-0.495726	-1.49214	-1.57437	-1.04472	1.63737		1	1.04351	9.69546e-05				16	3.48605	2.85007	1.58386	-0.603039	-1.81557	-1.20747	-1.20308	1.33653
	4.14755	4.06336	1.76725	-0.655268	-1.36733	-1.342	-1.85461	1.81904		1	1.28085	0.0531871				17	3.055	3.70746	1.4831	-0.505465	-1.90378	-1.24409	0.41803	1.52931
	3.9952	3.71684	1.17685	-0.582075	-1.88657	-1.19515	-1.48956	1.76018		1	1.12827	0.00147667				18	3.59345	3.56292	1.60352	-0.609572	-1.71295	-1.18661	-1.47449	1.92371
	3.42555	3.98932	1.53571	-0.494987	-1.30775	-1.2359	-0.858886	2.00625		1	1.10921	0.000838642				19	3.12522	3.09008	1.2302	-0.4843	-0.939547	-1.01151	-1.22216	1.55484
	3.73943	3.55877	1.29926	-0.791175	-2.18473	-1.08856	-0.996493	0.970328		1	0.995196	1.61388e-05				20	3.35574	3.55899	1.17521	-0.513801	-1.88192	-0.839267	-1.40137	1.50516
	3.15629	3.79804	1.03295	0.0632186	-1.39921	-1.29749	-1.20897	1.70813		1	1.09107	0.000477259				21	3.87774	4.09366	1.60447	-0.404579	-2.32371	-1.28896	-0.911077	1.34783
	3.47594	3.70161	1.4633	-0.438339	-1.48478	-0.864337	-1.54333	1.60182		1	1.08715	0.000421257				22	4.09909	3.77594	1.49958	-0.402363	-1.74977	-0.9984	-1.73403	1.85383
	2.87401	4.0454	0.760696	-0.492059	-2.32371	-1.23553	-1.46623	1.7335		1	1.15562	0.00317547				23	3.76613	4.05482	1.13876	-0.678709	-1.30224	-1.36031	-1.4354	1.79332
	3.4328	3.22727	1.11456	-0.361096	-1.10114	-1.3984	-1.85461	1.40437		1	1.14396	0.00230645				24	3.79353	4.00436	1.33831	-0.590355	-1.80755	-1.33489	-1.4591	1.75071
	2.98968	3.64857	0.545469	-0.624047	-1.2669	-1.12325	-0.831177	1.40425		1	1.07744	0.00030758				25	4.27434	4.01744	1.48166	-0.47755	-1.77565	-0.99826	-1.55713	1.61698
	3.10354	3.5784	1.49262	-0.422006	-1.1876	-0.997909	-1.00339	0.943872		1	1.00833	2.67412e-05				26	3.31729	2.74764	0.99921	-0.494225	-1.25771	-1.18668	-0.80114	1.46066
	4.11298	3.34393	1.60688	-0.629786	-1.24221	-1.10812	-1.30008	1.42797		1	1.10218	0.000676089				27	3.37962	3.57642	0.774664	-0.399491	-1.26317	-1.05202	-1.24483	0.710679
	3.90296	3.98639	0.943172	-0.0605733	-1.564	-0.711517	0.41803	0.881962		1	1.17018	0.00466703				28	2.81788	3.6055	0.395965	-0.470111	-0.863606	-1.19324	-1.39332	0.781483
	3.3379	3.95811	1.20777	-0.643638	-1.9128	-1.14931	-0.811969	1.47359		1	1.01409	3.32256e-05				29	2.84306	3.0773	1.08105	-0.513801	-1.14852	-1.08246	-1.28078	0.823271
	4.64589	3.56376	1.08455	-0.400063	-1.63357	-1.33129	-1.29239	1.31225		1	1.18839	0.00739455				30	3.63367	3.61039	1.18406	0.0632186	-0.982267	-1.0874	-1.08776	0.944692
	2.8326	3.88164	1.33964	-0.540567	-1.37839	-1.27944	-1.5527	1.85699		1	1.14121	0.00213616
	3.41341	3.17019	1.74203	-0.474877	-0.924014	-0.832449	-1.42741	0.866332		1	1.09307	0.000508461
	3.35947	3.73883	1.21875	0.0632186	-1.86647	-1.37337	-0.886059	1.57687		1	1.00675	2.51826e-05
	3.98724	3.32346	1.76725	-0.423766	-1.27335	-1.1683	-1.38466	1.38586		1	1.08873	0.000442993
	4.20645	3.55698	1.19067	-0.593924	-2.00231	-1.35194	-1.01482	1.02587		1	1.06177	0.000182423
	3.41779	4.06152	1.10421	-0.734291	-1.41245	-1.25986	-1.49212	0.783027		1	1.14765	0.0025551
	3.37439	3.51196	1.34815	-0.737251	-1.63523	-1.2444	-1.16843	1.76233		1	1.01491	3.42629e-05
	3.4671	3.51576	1.76725	-0.411156	-2.00417	-0.670402	-1.70216	1.31087		1	1.07466	0.000280694
	3.57178	3.60283	1.51054	-0.478493	-1.13711	-0.94419	-1.09479	1.48337		1	1.05324	0.000136187
	4.15612	3.57144	0.957448	-0.536371	-1.74265	-1.11051	-1.70726	1.50023		1	1.16722	0.00432156
	4.22263	3.88767	1.23696	-0.610599	-1.87756	-1.08288	-0.0106366	1.10926		1	1.10721	0.000789135
	3.09251	4.06819	1.02319	-0.407341	-1.74988	-1.48333	-1.21455	1.72761		1	1.10509	0.000739333
	4.14864	3.361	1.07864	-0.567993	-1.68236	-1.05935	-1.43957	1.76513		1	1.12261	0.00125194
	3.62677	3.233	0.674304	-0.467319	-1.51773	-0.97148	-1.32897	1.516		1	1.06731	0.000219842
	3.08819	4.00101	1.37004	-0.768212	-1.33089	-1.10609	-0.414678	1.70028		1	1.07001	0.000240624
	3.16664	3.38137	1.52432	-0.591691	-0.863606	-1.15821	-1.21298	1.49043		1	1.07395	0.000274199
	3.51488	4.07923	1.27926	-0.692258	-0.877426	-1.50872	-1.81048	1.74695		1	1.27316	0.0461746
	5.01246	4.09366	1.58576	-0.659489	-1.39779	-1.10753	-1.21081	0.790645		1	1.3259	0.112416
	3.68289	3.78257	1.46146	-0.488417	-1.69559	-0.714815	-1.22986	1.82661		1	1.08241	0.000361625
	3.66586	3.88179	1.47694	-0.613655	-1.12335	-1.09328	-1.4809	0.84682		1	1.14461	0.00234885
	3.05937	3.67211	1.20861	-0.578024	-1.71378	-1.13798	-1.07033	1.21945		1	0.975038	7.24938e-06
	4.01415	3.77478	1.17116	-0.493686	-1.78742	-1.03965	-1.30846	1.54565		1	1.09821	0.000597627
	3.12087	4.05729	1.06382	-0.418677	-1.38308	-1.07938	-1.60749	0.992407		1	1.14522	0.00238904
	3.50255	3.73575	1.19077	-0.662422	-2.32371	-0.947783	-0.849293	1.53114		1	1.00247	2.13755e-05
	3.71744	4.06951	1.28432	-0.40655	-2.26095	-1.07785	-0.907561	1.72295		1	1.08175	0.000353961
	4.28824	4.01882	1.34069	-0.40855	-1.87659	-1.09258	-1.53927	1.22057		1	1.18433	0.00668826
	4.98095	3.60332	1.41275	-0.484148	-2.0308	-0.736376	-1.02691	1.61714		1	1.24061	0.0242587
	3.52651	3.75072	1.43442	-0.140583	-1.23835	-1.14978	-0.965778	1.43536		1	1.04325	9.60663e-05
	3.02861	3.97456	1.54372	-0.492212	-1.60555	-1.04731	-1.32804	1.48449		1	1.06669	0.00021535
	3.20959	3.0861	0.820061	-0.633534	-1.22337	-1.03979	-1.03941	1.84044		1	1.05291	0.000134648
	3.33635	3.62543	1.24284	-0.332301	-1.71914	-0.995815	-1.22781	0.813678		1	1.00061	1.99038e-05
	4.26029	4.01536	1.36453	-0.428423	-0.844699	-1.15606	-1.24121	0.967423		1	1.23431	0.021239
	3.2912	3.57008	1.15246	-0.533622	-1.22117	-1.06593	-1.7781	1.6916		1	1.14443	0.00233659
	4.23674	3.7525	1.43982	-0.638351	-1.34927	-1.14066	-0.9955	1.62146		1	1.13097	0.00159675
	3.14522	4.0476	0.89294	-0.387149	-1.75815	-1.17075	-0.859928	1.02378		1	1.0481	0.000113928
	4.47429	3.98804	1.43072	-0.581311	-1.47807	-1.1541	-1.22998	2.00625		1	1.24081	0.0243647
	3.32483	3.82757	1.5957	-0.822285	-1.59846	-1.07486	-1.15797	0.992997		1	1.03331	6.73819e-05
	3.09177	3.02777	1.37308	-0.449493	-1.70487	-1.24983	0.41803	1.28427		1	0.977182	7.90498e-06
	3.24365	2.78384	1.26771	-0.503025	-1.97401	-0.748495	-1.40933	1.51996		1	0.984839	1.07388e-05
	3.77772	3.76399	1.19064	-0.612444	-1.68155	-0.670402	-1.4811	0.846877		1	1.1099	0.000856401
	3.47026	3.77412	0.48139	-0.576526	-1.68655	-1.20149	-0.935706	0.8768		1	1.08419	0.000383004
	3.39042	4.03992	1.44538	-0.609075	-1.58226	-1.28914	-1.08808	1.07707		1	1.05426	0.000141079
	4.24752	3.79002	1.50554	-0.445143	-1.88976	-0.670402	-1.49206	1.97174		1	1.19584	0.0088655
	3.72511	3.90179	1.1302	-0.74238	-1.65557	-1.00582	-1.85461	1.74477		1	1.19754	0.00923462
	3.64744	3.63317	0.840202	-0.468933	-1.78412	-0.972833	-1.51764	0.716809		1	1.10013	0.000634433
	4.42789	3.33901	1.24214	-0.344516	-1.0945	-1.07442	-1.38066	1.09436		1	1.17598	0.0054184
	3.26301	4.07844	1.58785	-0.552904	-1.77382	-0.996634	-0.859129	1.5357		1	1.03805	7.98794e-05
	3.91887	3.73319	1.6083	-0.494214	-1.04485	-1.18809	-1.15014	2.00625		1	1.16654	0.00424482
	4.16803	2.74764	1.37976	-0.651168	-1.78321	-0.946697	-1.54771	1.9797		1	1.14242	0.0022098
	3.54078	3.88577	1.677	-0.467126	-1.00587	-1.29727	-1.35591	1.45279		1	1.13747	0.00192246
	3.56583	3.56778	1.68083	-0.752944	-1.48208	-1.10977	-1.12228	1.9164		1	1.06211	0.000184506
	3.14551	2.79589	0.911609	0.0632186	-2.32371	-1.02394	-1.40871	1.03086		1	1.01724	3.73862e-05
	2.84084	4.02027	1.51454	-0.521054	-1.24316	-1.28649	-1.11325	1.00489		1	1.08611	0.000407424
	3.56448	3.56956	1.30877	-0.600404	-2.32371	-1.13438	-1.52638	1.58348		1	1.05972	0.000170134
	3.95554	3.36357	0.650995	-0.872281	-1.403	-1.1801	-1.48016	1.45758		1	1.15443	0.0030743
	4.4238	2.8581	1.63317	-0.270292	-0.972257	-1.06629	-1.44136	1.16563		1	1.1855	0.00688431
	2.95401	3.57803	1.3865	-0.498681	-1.57178	-1.01197	-1.12425	1.82707		1	1.01565	3.5225e-05
	3.70023	3.50534	1.53512	-0.308553	-1.2657	-0.670402	-1.45344	1.786		1	1.11613	0.00103306
	3.73157	3.84159	0.93468	-0.481252	-1.35036	-0.985095	-1.39186	1.53277		1	1.13077	0.00158759
	2.88144	2.82086	1.17123	-0.797956	-1.6642	-1.15252	-1.33479	1.55287		1	0.996861	1.72174e-05
	3.45727	3.47642	1.31976	-0.0240504	-1.12662	-1.4999	-1.42157	1.1651		1	1.08631	0.000409985
	3.23225	3.36426	0.946855	-0.553358	-1.62773	-1.19485	-1.27823	0.906331		1	0.997873	1.79065e-05
	3.6803	4.02211	1.47924	-0.489081	-0.936596	-1.36102	-1.13625	0.974918		1	1.15027	0.00274564
	3.3012	3.62468	1.21881	-0.71306	-1.88753	-0.844173	-1.18311	1.59773		1	1.0096	2.80589e-05
	3.64363	3.82371	1.50095	-0.410218	-1.56257	-1.11733	-1.27415	1.27038		1	1.04932	0.000118891
	3.16534	3.80894	1.46832	-0.383579	-1.72709	-0.882987	-1.0121	1.41552		1	0.990816	1.35983e-05
	3.5335	3.94339	1.17459	-0.428731	-1.75969	-1.05577	-1.42867	1.57789		1	1.09197	0.00049115
	3.11238	3.2403	1.19272	-0.405475	-1.5421	-1.19207	-1.32093	1.63813		1	0.99514	1.61035e-05
	3.91855	4.06002	1.16669	-0.5838	-1.86978	-1.42494	-1.55645	1.68194		1	1.17714	0.00558078
	3.86117	3.89521	1.53075	-0.460941	-1.86312	-0.837701	-1.02117	0.758978		1	1.06163	0.000181533
	4.14756	3.00271	1.30447	-0.490474	-1.78197	-1.08323	-1.43017	0.922064		1	1.06299	0.000190113
	3.35609	3.72855	1.23222	-0.421683	-1.78398	-1.24466	-0.865587	1.31816		1	0.963863	4.59043e-06
	2.86054	3.40363	1.24905	-0.593947	-1.20719	-1.12068	-1.50878	1.86055		1	1.10226	0.000677689
	3.24821	3.58781	1.63537	-0.446521	-1.56309	-0.877997	-1.18348	1.53823		1	1.00012	1.95328e-05
	4.71215	3.52609	1.10159	-0.717486	-1.01615	-1.08101	-1.49424	0.877635		1	1.27842	0.0508849
	3.26975	3.75913	1.6342	-0.927964	-0.863606	-1.15582	-1.25935	1.73458		1	1.15563	0.00317581
	3.87843	3.82138	0.911735	-0.489871	-1.64803	-1.12303	-1.32422	1.61541		1	1.1177	0.00108277
	3.43952	3.81198	1.12857	-0.487233	-1.81291	-1.28265	-1.53139	1.46825		1	1.07836	0.000316975
	4.45556	3.56963	1.50607	-0.515355	-1.40793	-1.3738	-1.23832	0.796573		1	1.15893	0.00347073
	3.04602	2.82795	1.21822	-0.461109	-1.57343	-1.23749	-1.41833	2.00625		1	1.04772	0.000112395
	3.38861	3.59057	1.46613	-0.33514	-1.18821	-1.06102	-0.173894	1.44198		1	1.01025	2.8757e-05
	3.12827	3.60858	1.37196	-0.147989	-1.82361	-1.08411	-1.08498	1.73193		1	0.989139	1.27304e-05
	4.28546	3.28353	0.395965	-0.339246	-1.14124	-1.12485	-1.5902	1.35744		1	1.24702	0.0277005
	2.81788	3.60897	1.34283	-0.475717	-1.45427	-0.820961	-1.46248	0.835239		1	1.06092	0.000177217
	4.12666	3.54441	1.46402	-0.23411	-1.19051	-1.29452	-1.29487	0.798592		1	1.12767	0.00145141
	4.26644	3.79401	1.46811	-0.628935	-1.72715	-1.13055	-1.4164	1.09751		1	1.14019	0.00207589
	4.16816	3.98465	1.26469	-0.622661	-2.32371	-1.24875	-1.1868	1.46849		1	1.13905	0.00201001
	2.90343	3.79308	1.38532	-0.749975	-1.81146	-1.3252	-0.986536	1.22288		1	0.993806	1.5287e-05
	3.36371	3.83882	1.62423	-0.577205	-1.60212	-1.29555	-1.22082	0.710679		1	1.04798	0.000113445
	3.07845	2.93758	1.44547	-0.415127	-2.32371	-1.0041	-1.00249	1.54137		1	0.910924	4.63024e-07
	4.15809	3.3823	0.711828	-0.625754	-1.44389	-1.10049	-1.33932	1.2821		1	1.13602	0.001845
	3.55725	3.6316	0.961191	-0.588264	-1.78706	-1.00192	-0.990842	1.53385		1	1.01048	2.90108e-05
	4.40858	4.01695	1.32733	-0.743785	-1.25278	-1.36222	-1.27109	0.800175		1	1.22861	0.0187847
	3.05425	3.84325	1.44717	-0.54822	-0.957266	-1.44638	-0.914185	1.5548		1	1.09357	0.000516616
	3.13762	3.57827	1.76725	-0.401127	-2.32371	-0.972838	-0.924329	1.01851		1	0.948363	2.39759e-06
	3.02629	3.60535	1.05384	-0.494197	-1.74649	-0.83385	-1.5369	1.57279		1	1.06355	0.000193748
	3.2932	2.80805	1.24821	-0.401934	-1.56902	-1.43297	-0.965793	1.00053		1	0.91623	5.88367e-07
	4.43695	3.84585	1.56521	-0.480423	-1.92164	-1.38566	-0.225018	1.80876		1	1.15619	0.00322451
	3.62728	3.58926	1.21255	-0.406701	-1.96896	-1.5	-1.42283	1.21385		1	1.03486	7.12531e-05
	3.87119	3.43576	1.57857	-0.770719	-2.01801	-0.980053	-1.52994	0.79038		1	1.07391	0.000273819
	2.94614	3.59292	1.09431	-0.729709	-0.952489	-1.10092	-0.941966	1.57185		1	1.07785	0.000311691
	4.17235	3.32706	1.01386	-0.584768	-1.00815	-1.12269	-1.49398	1.7203		1	1.19493	0.0086737
	4.00884	3.93445	1.40785	-0.440292	-1.71714	-0.804655	-1.133	1.27991		1	1.09288	0.000505442
	3.5343	3.62066	1.11014	-0.284783	-1.72997	-1.27219	-0.840833	1.57413		1	0.984805	1.07246e-05
	3.69727	4.07009	1.59078	-0.900227	-1.41997	-1.14055	-1.18401	0.894738		1	1.12406	0.00130637
	3.46456	2.74764	1.43192	-0.601369	-1.1287	-1.10597	-1.63996	0.961684		1	1.08303	0.000368921
	2.98259	3.99092	1.17787	-0.550001	-1.19259	-1.58359	-1.34507	1.70462		1	1.14883	0.00263911
	3.25704	3.82447	0.395965	-0.413074	-1.19494	-1.10114	-1.0455	1.59181		1	1.15046	0.00276004
	2.96724	3.73198	1.05333	-0.514961	-1.31304	-1.10668	-1.4579	1.42714		1	1.0872	0.000421881
	3.19144	3.82666	1.1202	-0.448782	-2.30463	-0.991963	-0.907317	1.20457		1	0.991268	1.38418e-05
	3.20076	4.01386	1.6283	-0.643657	-0.971717	-1.11717	-1.22451	1.26415		1	1.12991	0.0015487
	3.53723	3.29238	1.41523	-0.478328	-2.29038	-1.34431	-1.41497	0.97775		1	0.993815	1.52927e-05
	2.83769	3.92205	1.17064	-0.507271	-2.32371	-1.01803	-1.37103	1.64297		1	1.08376	0.000377687
	4.53878	2.74764	1.22018	-0.865514	-1.22386	-1.30655	-1.01099	1.51284		1	1.16622	0.00420991
	4.76203	3.52537	1.45344	-0.422445	-1.4539	-1.22873	-1.05762	1.8355		1	1.21689	0.0144857
	3.41025	3.24076	1.68133	0.0632186	-1.53789	-1.13639	-1.15758	1.44413		1	0.981975	9.5813e-06
	3.51007	4.03624	1.66605	-0.705368	-1.56618	-0.870428	-1.57404	0.933698		1	1.13617	0.00185282
	3.54558	3.24794	1.29693	-0.557411	-1.96043	-1.07984	-0.965263	0.967015		1	0.917385	6.19697e-07
	4.35707	3.71892	1.43414	-0.676454	-1.78556	-0.941395	-1.33241	1.77462		1	1.1656	0.00414194
	3.34404	3.75141	1.51811	-0.45596	-1.94725	-1.51059	-0.95894	1.56002		1	0.990919	1.36535e-05
	3.10139	3.75654	0.395965	-0.629135	-0.863606	-1.08826	-0.570447	2.00625		1	1.20559	0.0111741
	4.0625	4.02138	1.2557	0.0340381	-2.16068	-0.905202	-1.45903	1.46897		1	1.16436	0.0040085
	3.43591	3.09273	0.8404	-0.927964	-2.14132	-1.49495	-1.20298	2.00625		1	1.07872	0.000320679
	3.159	3.96898	1.19811	-0.748563	-1.23035	-1.12159	-1.85461	1.50905		1	1.19596	0.00889036
	3.40734	3.60287	1.31078	-0.347018	-1.80141	-1.46742	-1.71842	0.924749		1	1.07973	0.000331435
	3.07752	3.90816	0.395965	-0.476142	-1.97785	-1.20381	-0.491302	0.839944		1	1.08918	0.000449477
	3.1934	3.43519	0.53733	-0.492705	-1.19693	-1.06049	-1.18298	1.07229		1	1.08521	0.00039586
	4.70514	3.74166	1.53494	-0.414827	-1.23842	-1.47565	-1.19592	1.6112		1	1.24422	0.0261522
	4.90457	4.10361	1.33471	-0.499279	-1.15538	-1.04204	-1.55511	1.091		1	1.34751	0.153515
	3.37602	4.05544	1.30879	-0.504273	-1.64804	-1.10605	-1.24078	0.906952		1	1.07137	0.000251752
	2.8374	3.63182	1.20252	-0.638745	-1.74536	-0.894727	-1.5702	1.05644		1	1.05967	0.000169833
	3.19519	3.06354	1.08467	-0.528983	-1.4017	-0.990989	-1.08109	0.982724		1	0.960656	4.01926e-06
	3.26943	3.00575	1.06184	-0.747618	-1.29907	-1.20588	-1.40387	1.37176		1	1.03118	6.23777e-05
	3.92493	3.72263	1.20267	-0.696942	-1.30175	-1.04889	-1.10228	0.77316		1	1.09798	0.000593396
	2.89223	3.96596	1.31587	-0.592998	-0.978069	-1.16814	0.41803	1.21446		1	1.15188	0.00286921
	2.9295	3.97233	1.47224	-0.500219	-1.87014	-1.44537	-1.10212	1.58041		1	1.04492	0.000101897
	3.15857	3.56495	1.26787	-0.400344	-1.82166	-1.0448	-1.42737	1.64413		1	1.02199	4.45807e-05
	3.85603	4.05242	1.2436	-0.455887	-1.74322	-0.778854	-1.43145	1.42481		1	1.13646	0.00186823
	3.83508	3.59702	1.09479	-0.474888	-0.894415	-1.1237	-1.79106	1.27471		1	1.20721	0.0116041
	3.71701	4.03819	1.62173	-0.415677	-1.72187	-1.1778	-1.33584	1.62126		1	1.10852	0.000821205
	3.43654	2.7965	1.44786	-0.425604	-1.06978	-1.09442	-1.3332	1.57129		1	1.04813	0.000114036
	3.52972	3.34772	1.60894	-0.485254	-1.72533	-1.2903	-1.01024	1.23811		1	0.931345	1.15055e-06
	3.296	3.83377	1.36519	-0.476657	-1.8031	-1.12793	-1.31824	1.18607		1	1.02287	4.60605e-05
	4.25919	4.07456	1.76725	-0.58847	-0.863606	-1.40351	-1.16184	0.819036		1	1.24911	0.0289031
	3.10729	3.89847	1.76725	-0.153758	-1.04094	-0.931892	-1.26603	1.94077		1	1.15441	0.00307277
	3.96798	3.54887	1.21072	-0.581389	-1.26379	-1.33239	-1.24207	1.28639		1	1.08924	0.000450305
	3.08677	3.44728	1.44844	-0.533274	-1.45773	-1.24622	-1.51058	1.4361		1	1.03243	6.52778e-05
	3.53285	3.85956	1.48509	-0.423255	-1.6422	-1.06247	-1.22208	1.47386		1	1.04174	9.10794e-05
	3.61129	3.90968	1.21403	-0.591197	-1.22965	-1.20232	-1.17882	1.75224		1	1.11951	0.00114245
	4.12695	3.35698	1.5139	-0.429349	-1.22815	-1.3481	-1.59495	1.2051		1	1.14024	0.00207878
	2.97881	3.2699	1.11336	-0.49104	-2.32371	-1.05621	-1.30634	0.802589		1	0.985858	1.11822e-05
	4.50015	3.565	0.95369	-0.366514	-1.90219	-1.40782	-1.24659	0.753323		1	1.16627	0.0042153
	4.11071	4.01031	0.395965	-0.568737	-1.73649	-1.34174	-0.903854	0.773751		1	1.19684	0.00908104
	3.48234	3.8973	0.931647	0.0981286	-1.16715	-0.961408	-1.27567	1.62931		1	1.15002	0.00272688
	3.91776	3.78741	1.3262	-0.306751	-1.30457	-1.20502	-1.01631	1.37227		1	1.07872	0.000320726
	3.38724	3.82506	1.31759	-0.50519	-0.899311	-1.55934	-1.0283	1.84253		1	1.14466	0.00235165
	3.31278	3.39346	1.30007	-0.622424	-1.86921	-1.40512	-1.47971	1.11088		1	1.00113	2.03066e-05
	3.97483	3.72674	1.26681	-0.600218	-1.40681	-1.21842	-1.22565	1.80128		1	1.1212	0.00120082
	3.45716	3.8877	0.743205	-0.620164	-1.62542	-0.957712	-1.07166	1.55369		1	1.08538	0.000397906
	4.20746	3.6547	1.60244	-0.610706	-2.15353	-1.14925	-1.23777	1.85485		1	1.12495	0.00134079
	3.92481	3.6046	1.3496	-0.603231	-0.954468	-1.27345	-1.21946	1.41369		1	1.12914	0.00151455
	3.95649	3.58591	1.3732	-0.927964	-1.30989	-1.17992	-1.25071	1.3501		1	1.10188	0.000669816
	3.41709	3.55057	1.09704	-0.407476	-1.5987	-0.953407	-1.37342	1.46045		1	1.03005	5.98735e-05
	4.21659	3.8561	1.46049	-0.509311	-1.80106	-0.855264	-0.962095	1.60228		1	1.10837	0.000817518
	3.5603	4.002	1.63811	-0.496904	-1.58069	-1.17222	-1.34494	1.46991		1	1.09091	0.000474852
	3.38488	3.9407	1.62523	-0.641213	-2.02104	-1.35919	-1.63918	1.99345		1	1.15486	0.00311108
	4.87526	3.89501	1.24493	-0.335545	-1.32208	-1.11313	-1.41891	1.89486		1	1.32071	0.103848
	3.97342	3.42337	1.76725	-0.340004	-1.80287	-1.29088	-1.00958	1.24824		1	1.00239	2.13153e-05
	3.42157	3.79937	1.60403	-0.230123	-1.19004	-1.07393	-1.5448	1.55855		1	1.12352	0.00128591
	3.83752	3.01433	0.374843	-0.461017	-1.77718	-1.19569	-1.12469	1.58724		1	1.0942	0.000526911
	3.56031	3.03004	1.10705	-0.445813	-1.61273	-1.38817	-1.07129	1.14742		1	0.947629	2.32391e-06
	3.13512	3.21372	1.59293	-0.621279	-2.06291	-1.5891	-1.04789	0.927341		1	0.929494	1.06083e-06
	3.17353	3.01203	1.23212	-0.590815	-2.32371	-1.19505	-1.64842	0.818081		1	1.03021	6.02341e-05
	3.4097	3.82549	1.1992	-0.579109	-2.02415	-1.13349	-0.609125	1.63635		1	0.994638	1.57914e-05
	3.13005	3.0375	1.70145	-0.46868	-1.76533	-0.945225	-1.44229	1.50898		1	0.982441	9.76106e-06
	4.10501	3.8042	1.72806	-0.409661	-2.28014	-0.924107	-1.22924	1.21436		1	1.09398	0.000523364
	3.09301	3.81338	1.49037	-0.779513	-1.68457	-1.53906	-1.51752	1.60022		1	1.09527	0.000545035
	3.12922	4.06954	1.24539	-0.629249	-1.9476	-1.18709	-1.23718	1.29523		1	1.06056	0.000175041
	3.09018	3.59298	1.63717	-0.585457	-1.94609	-1.19644	-1.43684	1.246		1	1.00567	2.41623e-05
	3.32385	3.8759	1.41364	-0.486569	-1.94108	-1.17137	-1.41076	1.54315		1	1.05375	0.000138643
	3.35348	3.95123	1.01003	-0.450907	-0.924939	-1.56713	-1.54534	1.31925		1	1.19308	0.00829295
	3.47069	3.65304	1.20873	-0.483989	-1.7271	-1.149	-1.40811	1.37341		1	1.02988	5.95208e-05
	4.29757	3.36144	1.24232	-0.927964	-1.26613	-1.13968	-1.15334	0.998002		1	1.13212	0.00165017
	3.29968	4.09366	1.34347	-0.666884	-1.62692	-1.23579	-1.17694	1.47401		1	1.07784	0.000311588
	3.10222	2.82036	1.0359	-0.511141	-0.943728	-1.20759	-0.954535	1.66431		1	1.04508	0.000102488
	4.63162	3.56971	0.855928	-0.567545	-1.21519	-1.44095	-1.26244	0.910358		1	1.23755	0.0227482
	4.96318	4.02007	1.07347	-0.483827	-0.968387	-1.22737	-1.58417	1.0907		1	1.37806	0.22677
	3.47219	3.50344	1.65053	-0.90784	-1.27052	-0.999752	-1.40919	1.36154		1	1.07431	0.000277477
	3.08419	3.57432	1.57611	-0.479552	-1.44824	-1.5569	-0.878506	1.72297		1	1.00608	2.45441e-05
	3.25514	2.93642	1.43154	-0.573249	-1.58928	-1.12811	-0.987289	1.0337		1	0.90406	3.38558e-07
	3.23225	4.0436	1.71338	-0.489104	-1.79791	-0.670402	0.41803	1.251		1	1.09477	0.000536439
	3.56849	3.28617	1.76725	-0.540704	-1.95863	-1.18135	-1.33897	0.777654		1	0.992168	1.43388e-05
	3.06802	3.6047	1.75766	-0.708024	-1.97819	-1.3566	0.41803	0.772856		1	1.04338	9.65195e-05
	3.68606	4.02942	1.09385	-0.612758	-1.06571	-0.85944	-0.958267	1.51773		1	1.14159	0.00215854
	4.11644	3.7171	1.74492	-0.163652	-2.03942	-1.38219	-1.05195	1.62258		1	1.08614	0.000407785
	3.23177	3.73631	1.2427	-0.260993	-0.973542	-1.38204	-1.12519	1.16834		1	1.08149	0.000351014
	3.28743	3.71486	0.429186	-0.611866	-1.43976	-1.3531	-0.941471	1.31101		1	1.0944	0.000530239
	3.27718	3.84531	1.11021	-0.455463	-1.22311	-0.968946	-1.09699	0.770033		1	1.07409	0.000275482
	3.11019	2.74764	1.62314	-0.505695	-1.61723	-0.873669	-1.28509	1.0171		1	0.957339	3.50016e-06
	3.59887	3.73992	1.58135	-0.428738	-1.65195	-1.29596	-1.48772	1.68274		1	1.0836	0.000375758
	3.77572	2.91827	0.644384	-0.246195	-1.13941	-1.08017	-1.83917	0.741834		1	1.19692	0.00909957
	2.983	4.01236	1.42165	-0.717539	-1.57948	-1.00743	-1.51693	1.15809		1	1.10387	0.000712292
	3.19769	3.59285	1.48187	-0.30754	-1.70159	-0.831082	-1.42126	1.69967		1	1.03774	7.89875e-05
	4.22833	3.99556	1.14317	-0.492863	-1.14856	-0.936638	-1.85461	0.727759		1	1.28299	0.0552871
	2.86423	3.32608	0.96687	-0.728875	-1.11892	-1.15717	-0.846882	1.37707		1	1.0204	4.20326e-05
	4.55752	3.78978	1.15669	-0.60422	-1.68743	-0.8433	-1.40767	1.70953		1	1.22296	0.0165927
	3.98719	4.07719	1.02452	-0.477915	-1.66702	-1.10699	0.17207	1.8729		1	1.17126	0.00479953
	3.48278	3.05096	1.25594	-0.421685	-1.22183	-1.30333	-1.65342	1.38575		1	1.07623	0.000295601
	3.65417	3.07137	1.29875	-0.467114	-1.91456	-1.19906	-1.20467	1.80535		1	0.99077	1.35735e-05
	3.12248	3.0789	1.26559	0.0632186	-1.25531	-1.02515	-1.45254	1.36478		1	1.04252	9.36288e-05
	3.67394	3.86243	1.57839	-0.502809	-1.04463	-0.765954	-1.4524	1.61449		1	1.16324	0.00389195
	4.63088	3.82253	1.16865	-0.750299	-1.42863	-0.810556	-0.936083	1.25625		1	1.20365	0.0106775
	3.74618	3.08866	1.1191	-0.701694	-1.63665	-1.13257	-1.24965	1.00162		1	1.0001	1.95183e-05
	3.49184	3.94917	0.825727	-0.735135	-0.937326	-0.726753	-1.70908	1.54		1	1.24498	0.0265627
	3.09849	3.65226	1.08355	-0.713056	-1.05788	-1.19307	-1.81092	1.84144		1	1.19705	0.00912807
	3.47838	3.29156	1.12162	-0.431384	-1.10146	-1.5729	-1.21859	1.29405		1	1.05045	0.000123642
	3.72574	2.78474	0.395965	-0.488394	-1.60737	-1.24242	-1.07904	1.19662		1	1.06941	0.000235821
	4.04427	3.22451	1.42154	-0.584778	-1.54604	-1.46689	-1.17601	1.03453		1	1.0368	7.63739e-05
	3.45661	3.867	0.395965	-0.619786	-1.76055	-0.976908	-0.892799	1.33359		1	1.10391	0.000713127
	3.44145	2.88626	1.41197	-0.590174	-1.57098	-1.21927	-1.03085	1.29581		1	0.922699	7.85671e-07
	4.4367	3.45059	1.20502	-0.416578	-1.93155	-1.56971	-0.926914	1.14056		1	1.09783	0.000590548
	2.83087	3.45028	1.07928	-0.551176	-1.99154	-1.44461	-1.22525	1.72869		1	1.01578	3.53988e-05
	4.31025	3.32415	1.47225	-0.414346	-1.29306	-1.31137	-1.26934	1.43767		1	1.12178	0.00122161
	4.29878	4.00781	1.1367	-0.585122	-1.29707	-1.40931	-1.16692	1.27396		1	1.19156	0.00799267
	4.25881	3.88266	1.096	-0.484408	-2.02493	-0.878777	-1.17639	1.51906		1	1.13869	0.0019898
	3.12842	3.87838	1.29004	-0.405512	-1.29187	-1.0246	-1.07558	1.5675		1	1.0571	0.000155525
	3.13526	3.85848	1.04418	-0.590412	-1.49257	-1.25584	-1.53655	2.00625		1	1.15005	0.00272896
	3.45975	3.7409	1.69211	-0.47716	-1.07605	-1.21641	-0.125721	1.6514		1	1.07396	0.000274335
	4.07223	3.55926	1.47296	-0.68673	-1.29919	-1.03919	-1.73328	1.68146		1	1.18538	0.00686477
	3.10035	3.78891	1.57901	-0.715096	-1.71118	-1.16129	-1.26279	1.96575		1	1.07516	0.000285369
	4.19216	3.49685	1.42466	-0.76964	-1.89218	-1.17542	0.41803	0.7645		1	1.11689	0.00105682
	3.11423	3.14711	1.55088	-0.79547	-1.96106	-0.973223	-1.27424	1.54144		1	0.964945	4.80002e-06
	3.82738	2.93634	1.44359	-0.494899	-1.40488	-1.33154	-1.11463	1.96749		1	1.05656	0.000152716
	3.62085	4.02397	1.53411	-0.609031	-1.23023	-0.835884	-1.85461	1.5352		1	1.21542	0.0140111
	4.12577	4.05964	1.48411	-0.505646	-1.77208	-1.234	-1.03175	0.741251		1	1.12658	0.0014059
	3.92654	3.28731	1.15867	-0.403358	-1.56476	-1.04508	-0.984371	1.47704		1	1.00734	2.57534e-05
	4.45237	3.66075	1.32755	-0.439791	-1.76728	-1.2179	-1.4445	0.957513		1	1.16055	0.00362425
	4.28078	3.83545	1.64987	0.0632186	-1.84875	-1.5891	-1.28214	1.28485		1	1.15764	0.00335228
	3.31371	3.43338	0.694822	-0.478697	-1.92532	-0.917975	-1.3752	1.02881		1	1.03956	8.43035e-05
	4.12457	3.9406	1.4301	-0.314752	-1.92198	-1.13448	-1.722	0.864872		1	1.18061	0.00609308
	3.15337	3.71951	1.22019	-0.412566	-1.39146	-1.09226	-1.39738	1.65445		1	1.06971	0.000238193
	3.1469	3.59211	1.6851	-0.599661	-1.82572	-1.07304	-1.30403	1.19385		1	0.987547	1.19552e-05
	4.03017	3.59559	1.46348	-0.473427	-1.74359	-0.93413	-1.1571	1.3865		1	1.04706	0.000109865
	3.67366	3.97339	1.76725	-0.487848	-2.23362	-0.670402	-0.915234	1.47592		1	1.05893	0.000165625
	3.72936	3.84131	1.33373	-0.504504	-1.22085	-1.06578	-1.22842	0.775962		1	1.10355	0.000705234
	5.19009	3.87553	1.60989	-0.433492	-1.55145	-1.07326	-1.26376	1.69817		1	1.33943	0.137119
	3.81667	3.52034	1.193	-0.582089	-1.48514	-0.750218	-0.33314	1.30785		1	1.0119	3.06006e-05
	3.63987	4.0299	1.31358	-0.510599	-1.2712	-0.989616	-1.41091	2.00625		1	1.18191	0.00629482
	4.39328	3.34751	1.08483	-0.464143	-1.23715	-1.47127	-1.67745	1.51362		1	1.21748	0.0146814
	3.89887	3.79792	1.46422	-0.479041	-1.571	-1.20786	-1.12248	1.85308		1	1.096	0.000557678
	3.60299	4.07892	1.67079	-0.123885	-1.85813	-1.42064	-0.405866	1.23286		1	1.04817	0.000114208
	3.15656	3.56316	1.22592	-0.657453	-1.84887	-1.01333	-1.28065	0.947272		1	0.990323	1.33372e-05
	3.34754	3.48209	1.155	-0.282873	-1.30403	-0.824423	-1.21552	0.96664		1	1.0258	5.12783e-05
	4.52978	4.05407	1.53189	-0.415384	-1.26725	-0.993229	-1.69489	0.936637		1	1.28389	0.0561849
	2.81788	3.17234	1.07443	-0.598307	-2.12891	-1.00413	-1.41065	0.895177		1	0.998004	1.79981e-05
	3.6281	3.55459	1.5775	-0.455237	-1.75524	-1.29949	-0.989249	1.87291		1	1.01552	3.50574e-05
	3.11328	3.74913	1.1742	-0.530517	-1.5588	-1.17115	-1.21146	1.50208		1	1.02579	5.12728e-05
	4.96318	3.41135	1.26252	-0.622782	-1.25252	-1.11187	-1.04715	1.70254		1	1.26327	0.0382713
	4.22495	3.74937	1.34623	-0.545455	-1.9028	-1.14287	-0.847228	0.798932		1	1.0768	0.000301147
	3.61573	3.86402	1.30462	-0.0117288	-1.49663	-0.959953	-1.21357	0.818409		1	1.07751	0.000308283
	3.46069	3.60346	1.28469	-0.550954	-1.83264	-0.932058	-1.55963	1.7956		1	1.07724	0.000305551
	2.83676	3.76843	1.21512	-0.515433	-1.27592	-1.40079	-1.00637	1.49763		1	1.0475	0.000111555
	3.9776	3.88904	1.43298	-0.74876	-1.3955	-1.18964	-1.5277	1.61307		1	1.16824	0.00443747
	3.03172	3.63877	1.5675	-0.610786	-1.76436	-1.02293	-1.30044	1.12791		1	0.99514	1.61036e-05
	3.15523	3.6598	1.34065	-0.675823	-2.11721	-1.06266	-1.28338	0.818462		1	1.00623	2.46842e-05
	3.60113	2.96146	1.69403	-0.772633	-1.94539	-1.34765	-1.5881	1.34915		1	1.03096	6.1891e-05
	3.0603	3.6388	0.846098	-0.602119	-0.926333	-1.52932	-0.959983	1.21145		1	1.09841	0.00060136
	4.04166	4.00023	1.36349	-0.642527	-1.86282	-1.32974	-1.03875	1.83797		1	1.13193	0.00164149
	4.30506	3.98613	1.03585	-0.595633	-0.934741	-1.39111	-1.11235	0.941372		1	1.23322	0.0207484
	3.99467	3.64405	1.23372	-0.646347	-1.7869	-1.13608	-1.30171	0.962368		1	1.06965	0.000237721
	3.00781	3.56881	1.50034	0.0478178	-1.28355	-1.18851	-1.09109	0.937707		1	1.02134	4.35281e-05
	4.18992	3.67762	0.924289	-0.496431	-1.68624	-0.670402	-1.31708	1.84799		1	1.17072	0.00473308
	3.70857	4.00533	1.5704	-0.554401	-2.18684	-1.04882	-1.25351	1.6226		1	1.08933	0.000451678
	4.96318	3.57982	1.2305	-0.587844	-1.32075	-0.670402	0.191806	1.26799		1	1.27449	0.047337
	3.63893	4.09366	1.61998	-0.597987	-1.41996	-1.57666	-1.22462	1.60034		1	1.13608	0.00184821
	4.19649	3.3393	1.14351	-0.59336	-0.901909	-1.05954	-1.49865	0.990632		1	1.18784	0.0072954
	3.52969	3.24611	0.865965	-0.229231	-1.77699	-0.758566	-0.946627	1.36016		1	0.976509	7.69334e-06
	3.32689	3.35186	1.12717	-0.55587	-1.13	-1.28516	-1.39459	1.89895		1	1.10099	0.00065151
	4.11551	3.60439	1.01429	-0.444148	-1.7273	-0.812956	-1.29957	1.47379		1	1.10591	0.000758356
	3.0037	3.58092	1.7148	-0.927964	-0.863606	-0.885422	-1.39881	0.91882		1	1.1381	0.00195692
	3.10862	3.59136	0.607123	-0.449402	-1.12082	-1.37598	-0.984348	1.57251		1	1.09822	0.000597745
	3.08779	3.86325	0.714171	-0.401266	-1.2359	-1.03701	-1.23947	0.949239		1	1.11376	0.000962342
	3.51796	2.98876	0.450342	-0.500905	-1.74514	-1.42695	-1.85461	0.842949		1	1.16135	0.00370163
	4.321	3.57358	1.17821	-0.484569	-2.32371	-1.52135	-1.40206	1.11922		1	1.13961	0.00204178
	4.0972	3.45082	0.395965	-0.376846	-1.66416	-1.2423	-1.10806	1.37456		1	1.13705	0.00189974
	2.84295	3.59245	1.46882	-0.215924	-1.62641	-1.25911	-1.30715	1.44051		1	1.01037	2.88858e-05
	3.44398	3.02874	1.26493	-0.608459	-1.7939	-1.18904	-1.47172	1.41309		1	0.989579	1.29528e-05
	3.76448	3.62686	1.14666	-0.415985	-1.00898	-1.16973	-1.39384	1.08247		1	1.12388	0.00129954
	3.46806	3.51107	1.05715	-0.565623	-1.04497	-1.22975	-1.48891	0.981413		1	1.10743	0.000794405
	3.85631	3.39991	1.07911	-0.927964	-1.81413	-1.01974	-1.24609	1.86778		1	1.08724	0.000422444
	3.68899	2.86121	1.24713	-0.798485	-1.63285	-0.798067	-1.85461	1.30868		1	1.11102	0.000885976
	3.23511	3.55197	0.846005	-0.452271	-2.29011	-1.37911	-1.30526	0.996271		1	1.02881	5.72471e-05
	3.51892	3.83255	1.42543	-0.532029	-1.68739	-1.24447	-1.38936	1.75154		1	1.08044	0.00033917
	3.02066	3.96752	1.27241	-0.792462	-1.5131	-1.09233	-1.37661	0.85089		1	1.09401	0.000523883
	4.96318	2.91069	1.19833	-0.642463	-1.80067	-1.00463	-1.49174	1.46043		1	1.24761	0.0280347
	3.08039	3.96325	1.57098	-0.514979	-1.27094	-1.05165	-1.0338	1.52533		1	1.06653	0.000214158
	3.07914	2.99552	1.45789	-0.47906	-0.871802	-1.05101	-1.71777	0.953832		1	1.1238	0.00129658
	3.369	3.96503	1.06634	-0.473488	-1.34877	-1.58346	-0.962079	1.71475		1	1.10037	0.000639076
	3.11615	4.00327	1.41377	-0.442737	-1.78686	-1.08208	-1.32798	1.50536		1	1.06177	0.000182384
	3.46756	4.09505	1.42131	-0.503895	-0.940899	-1.00265	-1.35872	1.41183		1	1.17006	0.00465321
	3.25434	3.33591	1.17927	-0.00816635	-1.92101	-1.5608	-1.18334	1.73629		1	1.00644	2.48872e-05
	4.5539	3.58497	1.61341	0.0632186	-1.39228	-1.2946	-1.66739	1.52808		1	1.24409	0.0260816
	4.2502	3.57562	1.76725	-0.215808	-0.907776	-1.2345	-1.04075	1.37866		1	1.16544	0.00412401
	2.83846	3.25138	1.43623	-0.539396	-1.60372	-1.18785	-1.09871	1.03891		1	0.937774	1.52231e-06
	4.10703	3.73688	1.06241	-0.314425	-1.03504	-1.22469	-0.533544	1.54529		1	1.13612	0.00184985
	3.27461	3.82149	0.984403	-0.560879	-1.80268	-0.719225	-1.83227	1.31092		1	1.14405	0.00231203
	3.38336	3.39693	1.32446	-0.503848	-1.69737	-1.38308	-1.14839	1.9922		1	1.02398	4.79817e-05
	3.59094	3.72486	1.22896	-0.514129	-0.885881	-1.20752	-1.09709	0.909565		1	1.10942	0.000843866
	4.63544	4.09366	1.16473	-0.279247	-1.74893	-0.85574	-0.953237	1.54374		1	1.22324	0.0166939
	3.46092	3.58706	1.48631	-0.611407	-1.24039	-1.10317	-1.23236	1.91919		1	1.08487	0.00039155
	4.96318	3.90796	1.06715	-0.506211	-1.84139	-1.19976	-0.985298	1.33306		1	1.2602	0.0360526
	3.36961	3.47748	1.40773	-0.575306	-1.43273	-1.14373	-1.76314	1.5804		1	1.09929	0.000618134
	3.95013	3.03725	0.85808	-0.469145	-1.10005	-1.09303	-0.918471	1.3519		1	1.07253	0.000261593
	3.90205	3.56473	0.810711	-0.613951	-1.39065	-1.05434	-1.07062	1.9889		1	1.1336	0.00172169
	3.58031	4.01634	1.19802	-0.612091	-1.58901	-1.06589	-0.983891	1.49388		1	1.0658	0.00020901
	3.62461	3.41545	0.36765	-0.655091	-1.30335	-0.804031	-1.36426	1.58889		1	1.16248	0.00381459
	3.43267	3.04374	1.60819	-0.684	-1.98247	-1.45568	-1.4048	1.14333		1	0.974692	7.1486e-06
	3.06152	3.61246	1.4918	-0.643335	-1.7859	-1.21777	-1.22572	1.04932		1	0.979408	8.64556e-06
	3.02987	3.583	1.23787	-0.590717	-2.08041	-1.5891	-1.57899	1.38046		1	1.05628	0.00015126
	4.74977	3.92379	1.1229	-0.59976	-1.21138	-1.02034	-0.924126	1.80652		1	1.27355	0.0465121
	3.09845	3.69128	1.3478	-0.152838	-2.32371	-0.90342	-1.83523	1.42679		1	1.11095	0.000884093
	2.82277	4.00339	1.2709	-0.927964	-1.48778	-1.0844	-1.24241	1.37696		1	1.0976	0.000586273
	3.53302	3.98972	1.51224	-0.458516	-1.87507	-1.5891	-1.52347	1.35197		1	1.10909	0.000835623
	4.19095	3.52327	1.27212	-0.247572	-1.35445	-1.5891	-0.696182	0.848887		1	1.08875	0.000443356
	3.9627	3.05107	1.73535	-0.295129	-1.4696	-0.670402	-1.25258	1.54368		1	1.05775	0.000159049
	3.21539	3.98749	1.61558	-0.619104	-1.27624	-1.32949	-1.60749	1.11893		1	1.13816	0.00196028
	3.65833	3.7265	1.75378	-0.167142	-1.7393	-1.02053	-0.825062	1.62647		1	1.01156	3.0212e-05
	3.49491	2.74764	1.24811	-0.552147	-0.934237	-1.31759	-1.79498	1.02972		1	1.14495	0.00237116
	4.96318	4.031	1.14629	-0.355115	-1.20446	-1.10887	-1.4685	1.47789		1	1.3462	0.150785
	3.05658	3.58126	1.4954	-0.296319	-1.88971	-1.34251	-1.49668	1.56475		1	1.02892	5.74817e-05
	4.19965	3.72084	1.03925	-0.536125	-1.79907	-0.958231	-1.01888	1.65713		1	1.10892	0.000831124
	3.78476	3.70168	0.826647	-0.480441	-0.919706	-1.16701	-1.28463	1.52875		1	1.16771	0.00437731
	3.17721	3.92264	1.24348	-0.449812	-1.82295	-1.32047	-1.77413	1.26717		1	1.12005	0.00116093
	3.11565	3.84409	1.65147	-0.927964	-1.23572	-1.17007	-0.946121	1.17766		1	1.05772	0.000158884
	3.5432	3.3601	1.19473	-0.775789	-1.92467	-1.16514	-1.29454	1.86791		1	1.03634	7.51369e-05
	3.43789	3.3571	1.12065	-0.560431	-1.16206	-1.1935	-1.03607	1.84604		1	1.05372	0.000138498
	3.10521	3.84948	1.02222	-0.703287	-1.40578	-1.02844	-0.923582	1.52146		1	1.04785	0.000112934
	3.86439	3.32197	1.53596	-0.892208	-1.01371	-1.04003	-1.06656	1.56864		1	1.0974	0.000582577
	3.28936	3.86686	1.34483	-0.402717	-1.05234	-1.5891	-1.20401	1.42644		1	1.10917	0.000837681
	3.46848	3.56681	1.18871	-0.613347	-1.81444	-1.52413	-0.86067	0.863315		1	0.970105	5.93203e-06
	3.38045	3.99344	1.38367	-0.351123	-2.32371	-1.18055	-1.71447	1.4696		1	1.1297	0.00153909
	3.13504	3.35946	1.48421	-0.635864	-1.18304	-1.0327	-1.69986	1.67983		1	1.11033	0.000867589
	3.3609	3.33399	1.2322	-0.498625	-1.56633	-1.0066	-1.81007	0.992639		1	1.07887	0.000322251
	3.83394	4.02366	1.43468	-0.394903	-1.82506	-1.12654	-1.45792	1.64558		1	1.12999	0.0015524
	3.16719	2.8463	1.15984	-0.410432	-2.07566	-1.11827	-1.48135	1.04773		1	0.975511	7.38959e-06
	4.19676	3.91634	1.74444	-0.641695	-1.90574	-0.875218	0.123839	1.36698		1	1.12525	0.00135247
	4.96318	4.00858	1.49465	-0.60026	-1.83135	-1.35181	-1.37181	1.16243		1	1.29439	0.0675603
	4.02708	3.60662	1.1344	-0.574959	-0.863606	-1.56951	-1.01877	1.17848		1	1.15287	0.00294699
	3.27734	3.54982	1.44051	-0.644011	-1.88262	-1.02011	-1.20612	1.89882		1	1.01912	4.00827e-05
	3.61349	4.09366	1.48094	-0.610205	-1.33908	-1.00613	-1.1173	0.710679		1	1.11664	0.00104887
	3.03298	3.53721	1.52424	-0.654109	-1.1404	-0.901598	-0.642879	1.50304		1	1.00734	2.57464e-05
	4.61987	3.56206	1.34555	-0.529752	-1.86905	-0.955204	-1.46462	1.35271		1	1.18554	0.00689185
	4.34763	3.18165	1.3325	-0.507095	-1.25613	-0.714599	-1.34896	1.55504		1	1.1524	0.00290975
	4.20695	3.56529	1.29549	-0.927964	-1.61397	-1.09858	-1.75756	1.39865		1	1.18618	0.00700133
	3.18721	3.56238	1.54637	-0.50553	-1.72938	-0.827802	-1.20522	1.77065		1	1.00967	2.81275e-05
	3.59308	3.92995	0.749405	-0.801784	-1.27774	-0.670402	-1.25494	1.87931		1	1.19033	0.00775623
	2.82524	3.3228	1.17848	-0.674731	-1.71041	-1.11944	-1.15071	1.5297		1	0.972796	6.61942e-06
	3.4482	3.47716	1.24571	-0.463522	-1.8506	-1.00646	-1.1609	1.00977		1	0.960667	4.02109e-06
	3.18302	3.67496	1.43755	-0.516737	-0.863606	-0.928213	-1.2084	1.5118		1	1.10427	0.000720995
	3.08199	3.83207	1.78581	-0.805428	-1.43689	-0.930477	-1.44714	1.73137		1	1.11335	0.000950551
	3.23213	3.30814	1.31051	-0.680722	-1.54067	-1.18931	-1.04195	1.52062		1	0.954848	3.15326e-06
	3.39618	4.02862	1.60107	-0.566322	-1.75911	-1.01084	0.292846	1.10935		1	1.07087	0.000247629
	3.14179	3.04557	1.17654	-0.700902	-1.72107	-0.965651	-1.50376	1.36153		1	1.00158	2.06646e-05
	3.7641	3.54782	1.29906	-0.682462	-1.17041	-1.00365	-0.86336	0.909672		1	1.04592	0.00010556
	3.45058	2.82746	1.19281	-0.512795	-1.67116	-0.971183	-0.861634	1.18027		1	0.907725	4.0034e-07
	3.85585	3.91603	1.61535	-0.5107	-1.39064	-1.16181	-1.80346	0.97381		1	1.18319	0.00650033
	3.83862	3.75833	1.32851	-0.419483	-1.41147	-1.03016	-1.30224	1.24254		1	1.0794	0.000327889
	3.83165	3.35294	1.52965	-0.509486	-0.924743	-0.670402	-1.12426	1.46518		1	1.10508	0.000739162
	2.94953	3.79028	0.902861	-0.379183	-1.78735	-1.15124	-1.10356	0.775431		1	1.03419	6.95471e-05
	3.01687	3.82666	1.18352	-0.498262	-1.70804	-1.53315	-0.930088	0.779734		1	1.01667	3.65927e-05
	3.35597	4.00186	1.57908	-0.927964	-1.73321	-1.02978	-1.26234	1.84232		1	1.11225	0.000919353
	3.84295	3.72175	1.23579	-0.927964	-1.48768	-1.12455	-1.09336	0.757916		1	1.08367	0.000376689
	3.94082	3.9473	0.442223	-0.684705	-1.71448	-0.875892	-1.34878	1.17051		1	1.1914	0.00796132
	3.50204	3.53018	1.30085	-0.578391	-1.80465	-1.14032	-1.1963	1.54642		1	0.988729	1.25263e-05
	4.00862	3.42202	1.66121	-0.417906	-1.43556	-1.36555	-1.50198	1.36241		1	1.09798	0.000593361
	3.90259	3.66759	1.09205	-0.686919	-1.79789	-1.08568	-1.04197	1.87739		1	1.08189	0.000355577
	4.96318	3.47384	1.34579	-0.602323	-0.892551	-0.779217	-0.951195	1.48974		1	1.29284	0.0657799
	3.58148	3.97858	1.17474	-0.454567	-1.30171	-1.07958	-0.934491	1.42622		1	1.07634	0.000296615
	3.16123	3.85158	0.412742	-0.628887	-1.61065	-1.24499	-1.85461	1.31542		1	1.21232	0.0130568
	2.89451	3.50058	1.36764	-0.626135	-1.33696	-1.12538	-0.721868	0.924221		1	0.967586	5.35096e-06
	3.93697	3.62799	1.5242	-0.688297	-1.33102	-1.15963	-1.77215	1.6721		1	1.17814	0.00572372
	3.97951	3.99779	1.13217	-0.606686	-1.28598	-1.58658	-0.885878	1.56597		1	1.14743	0.00253946
	3.64245	3.38276	0.452702	-0.357422	-0.978248	-1.09607	-1.09469	1.62481		1	1.15186	0.00286729
	2.79201	3.30718	1.12178	-0.434762	-1.94108	-0.839587	-1.80278	1.5694		1	1.0859	0.000404721
	3.22936	4.00234	1.51938	-0.60383	-2.25999	-1.11207	-1.75069	1.18327		1	1.12713	0.00142885
	3.05896	3.77406	1.09415	-0.468193	-1.75882	-1.23439	-1.01044	0.813061		1	1.00161	2.0683e-05
	3.18282	3.46156	1.48124	-0.599462	-1.26742	-0.849449	-1.1642	1.36154		1	1.00967	2.81277e-05
	3.51119	3.41374	0.395965	-0.253171	-1.70278	-1.0511	-1.81056	1.79514		1	1.1938	0.00843846
	3.4991	3.0613	1.49628	-0.46431	-1.09266	-0.951023	-1.51619	1.56103		1	1.07791	0.000312342
	3.58396	3.62279	1.20761	-0.605629	-1.94721	-1.10264	-1.47229	1.00845		1	1.04025	8.63697e-05
	4.28623	3.63964	0.721924	-0.658537	-0.863606	-1.10618	-1.17293	1.16219		1	1.22487	0.0173069
	3.3986	3.8578	1.15687	-0.50353	-1.30796	-1.21065	-0.873782	1.29137		1	1.03659	7.58113e-05
	4.05596	3.12792	1.40455	-0.594273	-1.31665	-1.12141	-1.23928	0.850189		1	1.06444	0.000199664
	3.74429	3.94208	1.60669	-0.793128	-1.90228	-0.739384	-0.862454	1.34016		1	1.05399	0.000139791
	4.8208	3.88064	1.76725	-0.62159	-2.32371	-1.11686	-1.23821	1.22934		1	1.24258	0.0252762
	3.18853	3.12431	1.75158	-0.821814	-1.58706	-1.08124	-0.172276	0.898518		1	0.933835	1.28279e-06
	3.8853	3.86906	1.56634	-0.490485	-2.32371	-1.13036	-1.48298	0.923462		1	1.108	0.000808319
	3.33654	3.28079	1.69402	-0.432571	-1.38795	-0.974478	-0.997789	1.29007		1	0.954643	3.12624e-06
	3.60485	3.71153	1.56886	-0.429909	-1.83277	-1.2681	-1.12885	1.61334		1	1.01452	3.37692e-05
	4.0764	3.64033	1.27845	-0.65377	-1.7712	-1.30943	-1.48089	1.33906		1	1.10761	0.000798829
	2.94674	3.28132	1.19552	-0.410026	-0.934049	-1.56796	-1.44697	1.00176		1	1.09626	0.000562301
	3.1711	2.75457	1.03972	-0.425236	-1.96908	-1.03786	-1.09544	0.909665		1	0.929235	1.04882e-06
	3.13196	3.87262	1.47641	-0.919597	-1.17874	-0.889704	-0.935652	1.62185		1	1.08735	0.000423993
	3.89858	3.83451	1.57765	-0.603533	-2.03901	-1.02552	-1.51649	1.37807		1	1.10481	0.000733159
	3.88763	3.73673	1.2182	-0.481359	-1.67164	-1.00504	-1.26726	0.904862		1	1.06753	0.000221509
	3.53686	3.12459	1.60518	-0.498438	-0.863606	-1.33725	-0.911784	1.80508		1	1.07655	0.000298733
	4.15468	3.74823	0.829298	-0.49117	-1.83678	-1.12258	-0.619644	1.76953		1	1.11188	0.00090925
	4.15787	3.32874	1.18519	-0.415219	-1.8549	-0.961399	0.41803	1.64754		1	1.10364	0.00070718
	2.98584	3.96615	1.18396	-0.710761	-1.34506	-0.990718	-1.34582	1.35727		1	1.10054	0.000642459
	3.76804	3.82744	1.03802	0.0632186	-1.25054	-1.25521	-1.1607	1.30453		1	1.1153	0.00100771
	3.27956	3.5163	1.35912	-0.423329	-0.978243	-1.29063	-1.33579	1.7295		1	1.09957	0.000623478
	4.13065	4.01276	1.14315	-0.589976	-1.0816	-1.52498	-1.19538	1.1458		1	1.19743	0.00920995
	2.81989	3.83282	1.74717	-0.45692	-2.33063	-1.08217	-1.00662	1.95227		1	1.05788	0.000159758
	3.48461	4.03148	1.32898	-0.590083	-1.31359	-1.05811	-1.07753	1.60556		1	1.09633	0.000563468
	3.52676	2.93493	1.45831	-0.80121	-1.21777	-1.57329	0.41803	1.50683		1	1.0804	0.000338799
	3.35701	3.18919	0.667101	-0.594867	-1.53327	-1.10585	-1.4242	1.41286		1	1.05726	0.000156418
	4.17517	3.83369	1.39471	-0.433114	-2.22179	-1.19173	-1.29045	1.79319		1	1.1392	0.00201853
	3.32715	3.90976	1.33207	-0.410361	-2.22993	-1.02025	-1.05245	2.00625		1	1.06862	0.000229711
	3.97684	3.89869	1.60502	-0.0735993	-1.80084	-0.901413	-1.47834	0.710679		1	1.13888	0.00200053
	3.60507	3.63867	1.40739	-0.579929	-0.993567	-1.15481	-1.35701	1.58273		1	1.11719	0.00106635
	2.88054	3.68964	1.48049	-0.540073	-1.68063	-1.49664	-1.04169	1.52437		1	0.999578	1.91274e-05
	3.11648	3.77598	1.53268	-0.666495	-1.28326	-1.01164	-1.5261	1.45191		1	1.0978	0.000590007
	4.22068	3.91151	1.07152	-0.528714	-2.04804	-1.01931	-1.36069	1.53021		1	1.15625	0.00322935
	3.57972	3.90161	1.07222	-0.474236	-1.36057	-1.17476	-1.26429	1.61095		1	1.10391	0.00071309
	3.04698	3.66538	1.64387	-0.52033	-1.84033	-1.33017	-1.35135	1.48325		1	1.01435	3.35563e-05
	3.38872	3.53137	0.50672	-0.677946	-1.15845	-1.21093	-1.7815	1.55982		1	1.20568	0.011198
	3.78062	3.7986	1.21678	-0.661713	-1.48745	-0.670402	-1.27869	0.889692		1	1.09956	0.000623253
	3.14523	3.51618	1.17722	-0.523299	-0.9138	-1.11407	-1.41948	1.41059		1	1.10392	0.000713299
	4.12979	3.76215	1.36542	-0.396689	-1.86223	-0.91806	-1.10765	1.31951		1	1.07424	0.000276816
	3.13286	3.94945	1.09796	-0.672557	-1.21252	-1.03807	-1.85461	1.56109		1	1.19911	0.00958872
	4.24449	3.96259	1.5386	-0.506924	-1.73443	-0.98488	-1.15447	1.54132		1	1.13949	0.00203536
	3.29216	3.90111	1.58049	-0.736529	-2.12565	-0.946535	-1.27226	1.85405		1	1.07878	0.000321336
	4.26427	4.01167	1.36015	-0.419711	-1.03086	-1.02487	-1.11666	1.58997		1	1.20926	0.0121682
	3.11381	3.91226	0.981427	-0.447605	-1.62446	-1.11752	-1.43101	1.3674		1	1.08315	0.000370318
	3.15727	2.84654	0.707525	-0.491794	-1.71741	-1.14561	-1.46914	1.75976		1	1.06109	0.000178261
	3.02308	2.99676	1.44051	-0.586885	-1.30011	-1.52485	-1.32318	1.61261		1	1.02073	4.25488e-05
	3.57944	3.25567	0.395965	-0.493035	-1.65085	-0.826688	-1.21663	1.54379		1	1.09304	0.000508051
	3.83121	3.51742	0.824131	-0.383145	-1.80324	-0.923865	-1.52751	0.860919		1	1.10064	0.000644479
	3.70383	2.89636	1.041	-0.364747	-1.95037	-1.07271	-1.43125	1.14973		1	1.00446	2.30698e-05
	3.39973	3.63999	1.24685	-0.504206	-1.98019	-1.15597	-1.53745	0.839109		1	1.04469	0.000101084
	3.69043	3.58072	1.48514	-0.547707	-1.72033	-1.1806	-1.50559	1.54414		1	1.0592	0.000167155
	3.7253	3.65964	1.63847	-0.260294	-1.03358	-1.56979	-1.50966	1.17505		1	1.14455	0.00234452
	3.68975	4.0637	1.39316	-0.399615	-1.50743	-1.11776	-1.47937	1.37202		1	1.12869	0.00149474
	3.64443	3.33168	0.605396	-0.425472	-1.24337	-1.16943	-1.15228	0.780204		1	1.08965	0.000456301
	4.29541	3.57761	1.15461	-0.470192	-1.74035	-1.09804	-1.23784	0.821984		1	1.11053	0.00087288
	3.12479	3.93648	1.39057	-0.493033	-1.03624	-1.5891	-1.25239	1.85897		1	1.15631	0.00323518
	3.78391	3.44415	1.54405	-0.652651	-1.2436	-1.47725	-0.448695	0.984839		1	1.01864	3.9384e-05
	3.12708	3.111	1.25376	-0.441459	-1.80528	-1.07556	-1.11992	1.83191		1	0.961721	4.20102e-06
	3.02303	3.57947	1.37076	-0.66725	-1.89539	-1.17057	-1.03084	1.12871		1	0.947423	2.30361e-06
	3.55211	4.00476	1.60684	-0.621587	-1.41901	-0.755829	-1.28767	0.730632		1	1.11589	0.00102571
	3.44477	3.64919	1.35666	-0.420445	-1.49944	-0.902751	-1.40265	1.66824		1	1.0603	0.000173487
	3.50097	3.81248	1.26249	-0.617197	-1.99109	-0.897446	-0.809971	0.810916		1	0.998701	1.84899e-05
	3.64544	3.79535	1.22228	-0.436649	-1.33909	-1.27582	-0.853946	0.776582		1	1.04707	0.000109883
	4.20143	3.61746	1.32352	-0.545631	-1.25001	-1.32902	-1.07048	1.48746		1	1.11953	0.00114322
	3.19183	3.70877	1.52958	-0.421825	-1.17456	-1.10845	-1.63327	0.710679		1	1.12228	0.00123974
	3.73329	4.04926	1.23973	-0.426922	-1.39566	-1.17633	0.578651	0.940409		1	1.16627	0.00421509
	3.22914	3.12777	1.19773	-0.567049	-1.58662	-0.994704	-1.16981	1.0156		1	0.946189	2.18561e-06
	4.173	3.61786	1.25133	-0.752012	-1.36388	-1.13236	-0.758097	1.32459		1	1.08504	0.000393675
	3.91622	3.6963	1.46741	-0.402528	-0.863606	-1.24142	-1.16024	1.75241		1	1.16283	0.00384987
	3.13558	3.68447	1.37837	-0.492837	-1.5558	-1.14749	-1.3943	1.54887		1	1.03717	7.74051e-05
	3.64779	4.03837	1.48394	-0.505438	-1.67382	-1.47087	-1.51494	1.45545		1	1.1283	0.00147811
	3.50089	3.58401	1.246	-0.41201	-0.863606	-1.57353	-1.26928	1.53611		1	1.12738	0.00143915
	3.3722	3.60528	1.31096	-0.568919	-0.863606	-1.15166	-1.25079	0.728286		1	1.11007	0.000860739
	4.37478	3.88359	1.23216	-0.437333	-0.945302	-1.24186	-0.988532	1.33057		1	1.20561	0.0111782
	3.44661	3.67964	0.781791	-0.359368	-1.2231	-0.670402	-0.787026	1.33049		1	1.06932	0.00023512
	3.5049	3.97196	1.2468	-0.402784	-1.38862	-1.09637	-1.6316	0.772061		1	1.1454	0.00240059
	3.00284	3.65059	1.76725	-0.504492	-1.23214	-1.08537	-1.40517	1.09855		1	1.06474	0.000201694
	4.61786	3.81412	1.48827	-0.49568	-1.5161	-1.09951	0.41803	1.53982		1	1.22937	0.019095
	3.72192	3.56119	1.40241	-0.591467	-1.53757	-0.697444	-1.25626	0.740672		1	1.05522	0.000145803
	3.49773	3.21246	1.56978	-0.35474	-1.7717	-1.21412	-1.45468	0.710679		1	1.00358	2.23051e-05
	3.63415	3.28314	1.5071	-0.514171	-1.06507	-0.750914	-1.58891	0.994537		1	1.10997	0.000858291
	3.38883	3.02885	1.48692	-0.405174	-1.12243	-0.93095	-1.14293	0.857859		1	1.0059	2.43781e-05
	3.78792	4.01419	1.51636	-0.114705	-1.12235	-0.996496	-1.76434	1.36716		1	1.21439	0.0136896
	3.46826	3.46514	1.62803	-0.403874	-1.93702	-1.52421	-1.39442	1.13959		1	1.00025	1.96291e-05
	3.62798	4.06045	1.09959	-0.370803	-1.96999	-1.20795	-0.87505	1.29138		1	1.04977	0.000120746
	3.93093	3.69318	1.30439	-0.566715	-1.76296	-1.27764	-1.10066	1.4814		1	1.04581	0.000105145
	4.88281	3.94024	1.26678	-0.438667	-1.53824	-1.14167	-1.39583	1.60804		1	1.29153	0.0643009
	3.19562	4.04837	1.09952	-0.587951	-1.91744	-1.40151	-1.14698	1.58212		1	1.07227	0.000259378
	3.12148	3.18761	0.96262	-0.740343	-2.32371	-1.14513	-1.40598	1.31406		1	1.00815	2.65533e-05
	2.87646	3.58647	1.72544	-0.497203	-1.85371	-0.954943	-1.28399	1.65636		1	1.01269	3.15237e-05
	2.90627	4.07971	1.41254	-0.743957	-1.34917	-1.38454	-1.21997	1.58753		1	1.11713	0.00106452
	3.46579	3.84453	0.877168	-0.369239	-1.89489	-1.47977	-1.45445	1.49411		1	1.09899	0.000612318
	3.45986	3.94627	0.848582	-0.649239	-1.27228	-0.685397	-1.3911	1.83462		1	1.17905	0.0058569
	3.37568	3.62288	1.4997	-0.462231	-1.44929	-1.05837	-1.28527	1.4306		1	1.02002	4.14522e-05
	3.97623	2.96532	1.21039	-0.284481	-2.16359	-1.2812	-1.27353	1.51777		1	1.02071	4.25167e-05
	3.89037	3.7879	1.04833	-0.428902	-1.92352	-1.25929	-1.15887	1.5458		1	1.07024	0.000242483
	3.90744	3.27272	1.22761	-0.458841	-1.7197	-1.06607	0.292167	1.53362		1	1.03928	8.34606e-05
	4.24882	3.62431	1.02325	-0.5911	-1.91284	-1.06448	-1.00328	2.00625		1	1.13915	0.00201556
	4.96318	3.82535	1.43934	-0.489451	-1.29837	-1.15809	-1.45161	0.99385		1	1.30433	0.0799031
	3.31961	3.71327	1.57217	-0.204604	-1.48703	-1.11669	-0.430872	1.16699		1	0.969011	5.67272e-06
	3.01719	3.82973	0.430122	-0.613611	-2.32371	-1.33541	-1.12166	1.33598		1	1.10895	0.000832092
	3.80594	3.59883	1.41752	-0.627859	-1.24423	-0.966188	-1.04657	1.37581		1	1.05484	0.000143938
	3.07447	3.32594	1.54682	-0.599089	-0.966014	-1.02887	-1.20541	0.885811		1	1.04801	0.000113558
	3.74588	3.57584	1.0576	-0.417739	-1.86109	-1.12537	-1.67752	1.1361		1	1.0907	0.000471796
	3.73104	2.76839	1.59248	-0.620443	-1.24984	-1.0596	-0.680925	0.877191		1	0.981367	9.3511e-06
	4.28787	3.63643	1.18094	-0.522884	-1.72748	-1.22158	-1.16331	0.909223		1	1.10455	0.000727368
	3.43252	3.997	0.395965	-0.630892	-2.32371	-1.07135	-1.75767	0.73907		1	1.23012	0.0194089
	3.45962	3.11053	1.00703	-0.794324	-1.66351	-1.3459	0.41803	1.67012		1	1.05607	0.000150143
	3.86222	2.78401	1.59805	-0.624476	-0.902565	-1.08042	-1.41825	0.734873		1	1.12717	0.00143029
	4.19229	3.98348	1.38509	-0.664501	-0.928622	-1.05471	-0.818499	1.93944		1	1.22335	0.0167366
	3.42608	3.48826	1.4873	-0.378943	-1.67485	-1.45561	-1.50228	1.25505		1	1.02398	4.79698e-05
	3.37253	2.90553	1.31909	-0.131345	-1.25683	-1.58594	-1.85461	1.48106		1	1.12702	0.0014244
	3.22552	4.02916	1.59634	-0.927964	-1.39835	-1.25774	-0.909443	1.38101		1	1.07362	0.000271267
	3.57822	3.01718	0.546298	-0.466782	-1.75963	-1.10187	-0.949837	1.67274		1	1.03033	6.04907e-05
	3.13289	4.03345	1.19097	-0.693124	-1.212	-0.979129	-1.42182	1.48154		1	1.13827	0.0019661
	2.8313	3.13334	1.20382	-0.572945	-1.40254	-1.51669	-1.65232	1.59521		1	1.07999	0.000334227
	4.03423	3.59265	1.34971	-0.492641	-1.09678	-0.855051	-1.16141	1.39791		1	1.11603	0.00102988
	3.15533	3.77504	1.55859	-0.250824	-1.07277	-1.38519	-1.27445	1.63721		1	1.10183	0.000668735
	3.46844	3.80376	1.22535	-0.489247	-1.63499	-1.18939	-0.817783	1.16603		1	0.988698	1.25109e-05
	3.75217	3.92291	1.30268	-0.600113	-1.23522	-1.22252	-0.957285	1.76148		1	1.11337	0.000951033
	3.36617	3.74085	0.430763	-0.315774	-1.6042	-0.672437	-1.25729	1.87754		1	1.15735	0.00332683
	3.95093	3.59129	1.17316	-0.403687	-1.9385	-1.42938	-0.918567	1.48661		1	1.02322	4.66526e-05
	3.34033	2.96327	1.62001	-0.512136	-1.56752	-0.948454	-1.39569	1.48555		1	0.98726	1.18206e-05
	3.7586	3.85673	1.06292	-0.402933	-1.56121	-1.14089	-1.29286	0.953399		1	1.08576	0.000402811
	3.951	3.45227	1.58195	-0.55406	-2.00572	-1.11841	-1.77776	1.54203		1	1.11973	0.00114974
	4.01694	3.71261	1.24556	-0.590989	-1.51647	-1.01188	-1.55145	1.60584		1	1.14246	0.00221197
	3.2285	4.00617	1.51271	-0.494399	-1.58274	-1.08221	-1.15569	1.82719		1	1.08051	0.000340017
	3.47565	3.01856	0.730541	-0.9435	-1.13689	-1.17107	-1.42511	1.47804		1	1.11651	0.00104504
	3.49778	4.07439	1.46722	-0.608477	-1.9874	-0.967483	-1.05662	1.68789		1	1.07048	0.000244433
	3.13082	2.91904	1.23942	-0.673759	-1.77113	-1.15217	-1.18083	0.862926		1	0.936119	1.41686e-06
	3.10349	4.01985	1.56266	-0.362455	-0.965016	-0.901555	-1.53005	0.924666		1	1.16934	0.00456629
	4.04408	4.02615	1.16559	-0.444775	-1.87516	-1.09095	-1.44142	0.816569		1	1.15115	0.00281208
	3.505	2.7945	1.16543	-0.452215	-1.65848	-1.00973	-1.51041	1.57756		1	1.02392	4.78622e-05
	4.36019	3.69854	1.01873	-0.112223	-1.65363	-1.09994	-1.1545	1.73057		1	1.16014	0.00358428
	3.3934	4.06754	1.77368	-0.411853	-1.25883	-1.33858	-1.56215	0.929145		1	1.15587	0.00319652
	4.02877	3.40323	1.23358	-0.489137	-1.35148	-0.990042	-1.02983	0.832022		1	1.0557	0.000148255
	3.28097	4.0402	1.10454	-0.927964	-1.14769	-0.963052	-1.79961	1.55159		1	1.22467	0.0172315
	4.15698	3.77591	1.38734	-0.712015	-1.9466	-1.52673	-1.05641	1.4955		1	1.10032	0.000638194
	4.19891	3.8547	1.41459	-0.513338	-1.77899	-1.09553	-1.51022	1.96076		1	1.19014	0.00771958
	3.42851	3.96789	1.09786	-0.0800644	-1.27686	-1.20853	-1.16266	1.44799		1	1.10023	0.000636462
	3.16993	2.93833	1.46493	-0.455264	-2.01634	-0.992403	-1.72637	1.17568		1	1.01747	3.76984e-05
	4.16387	3.5504	1.60565	0.116833	-1.22332	-1.10085	-1.04732	0.92695		1	1.11681	0.00105424
	4.7272	3.71797	1.16712	0.000305592	-1.35255	-0.919324	-1.52331	1.372		1	1.26772	0.0416776
	3.16205	3.56444	1.30321	-0.605388	-1.08417	-1.1379	0.2628	1.45926		1	1.06833	0.000227506
	3.88035	4.05064	1.22048	-0.629119	-1.92067	-1.10112	-1.1798	1.13761		1	1.09618	0.000560803
	3.40646	3.82979	1.02	-0.410547	-1.19713	-1.25559	-1.20343	2.00625		1	1.13825	0.00196528
	3.78602	3.78323	1.3576	-0.596003	-1.32562	-1.11276	-1.44689	1.23348		1	1.10724	0.000789845
	3.79351	3.56516	1.61737	-0.313956	-0.963377	-1.1721	-1.30976	1.67607		1	1.13084	0.00159087
	3.11333	3.32982	0.970369	-0.222089	-1.61764	-0.985626	-1.23836	1.79209		1	1.02093	4.28652e-05
	4.39764	4.03292	1.54794	-0.602135	-1.79995	-0.670402	-1.33257	1.25104		1	1.19504	0.00869567
	4.8842	3.65794	1.41775	-0.549834	-1.74315	-1.01548	-1.21802	1.54704		1	1.23296	0.0206312
	3.63072	3.97148	1.25711	-0.479863	-1.73373	-0.957031	-1.47276	1.04608		1	1.09774	0.000588871
	4.15557	2.96923	1.07103	-0.478191	-1.56085	-0.70916	-1.44057	0.91834		1	1.10311	0.000695724
	3.39194	4.02687	1.10158	-0.288281	-1.61697	-1.10252	-1.1115	1.27144		1	1.05913	0.000166726
	3.07102	2.74764	1.2954	-0.479272	-1.29539	-0.920287	-1.1324	0.908865		1	0.975048	7.25227e-06
	3.08986	3.93814	1.3264	-0.655272	-0.926183	-1.2506	-1.46059	0.903886		1	1.15769	0.00335715
	3.54096	4.02215	1.15927	-0.481458	-1.65577	-1.15249	-0.945184	1.48335		1	1.05431	0.000141329
	4.25113	3.67083	1.40369	-0.750174	-1.74426	-1.56235	-1.19665	1.01076		1	1.11717	0.00106575
	4.08903	2.91467	1.48704	-0.404826	-0.894033	-0.979822	0.41803	0.749325		1	1.15513	0.00313316
	4.20793	3.54657	1.53703	-0.479617	-0.867604	-1.22136	-1.32573	1.94133		1	1.21867	0.015077
	3.39776	3.59271	1.18393	-0.469467	-1.7797	-1.0329	-0.952999	1.72354		1	0.98571	1.11165e-05
	3.42964	3.81399	1.4309	-0.670569	-2.18766	-0.706324	-1.25378	1.97191		1	1.08958	0.000455284
	3.04699	3.13653	1.45811	-0.483851	-1.07255	-1.14523	-0.958875	1.9534		1	1.04134	8.97989e-05
	3.08152	3.88639	1.05583	-0.442613	-1.91298	-1.27718	-1.57831	1.29362		1	1.08632	0.000410184
	3.12645	4.03976	1.24605	-0.595406	-1.52888	-1.58259	-1.17071	2.00625		1	1.13519	0.00180181
	3.97206	3.5632	1.17241	-0.927964	-1.40678	-0.864536	-0.963304	1.71581		1	1.09976	0.000627158
	3.58973	3.81707	1.32172	-0.382257	-1.43443	-1.02894	-1.27239	1.32658		1	1.0593	0.000167695
	3.20341	3.45669	1.75831	-0.514888	-1.96279	-1.1322	-1.1549	1.87562		1	0.998168	1.81128e-05
	3.45968	3.45786	1.19841	-0.520758	-1.36813	-0.670423	-0.894132	0.961306		1	0.997641	1.77463e-05
	3.10788	3.9334	0.395965	-0.488025	-1.88928	-1.07138	-1.08355	0.850156		1	1.11641	0.00104187
	2.81469	3.84442	1.69764	-0.406749	-1.86352	-1.12447	-1.39334	0.710679		1	1.0624	0.000186324
	4.02607	3.55274	1.64952	-0.601549	-1.53762	-1.15692	-1.18573	1.15013		1	1.05643	0.00015202
	3.84964	3.71059	1.1542	-0.388313	-1.84396	-0.938482	-1.21579	1.10057		1	1.04397	9.85574e-05
	4.26449	3.51979	1.19233	-0.493413	-0.966869	-1.57236	-1.20851	0.928918		1	1.17843	0.00576623
	3.92339	3.01323	1.40504	-0.614725	-1.55174	-1.12696	-1.56777	1.67369		1	1.08492	0.000392164
	3.98463	2.97385	1.27038	-0.582258	-1.77547	-1.19926	-1.37498	1.93065		1	1.08035	0.000338248
	3.99517	3.59992	1.44583	-0.420786	-1.78564	-1.28779	-0.848405	1.19508		1	1.00614	2.45993e-05
	4.14746	3.46604	1.50713	-0.609606	-1.45599	-1.33429	-1.24332	1.55912		1	1.09596	0.000557004
	4.79348	3.44307	1.05445	-0.68186	-1.29449	-0.974099	-1.23576	1.48192		1	1.23896	0.0234377
	2.87017	3.34339	1.59883	-0.158796	-1.80328	-1.47657	-0.812242	1.09819		1	0.920055	6.98364e-07
	4.21146	3.32085	1.6941	-0.465179	-2.32371	-0.925438	-1.50169	1.58523		1	1.11429	0.000977836
	3.60991	3.6742	1.04777	0.0632186	-1.24162	-1.08865	-0.645708	1.67633		1	1.06879	0.00023104
	4.42143	3.92951	1.76136	-0.692197	-1.30818	-1.5891	-1.26206	0.710679		1	1.22887	0.0188886
	3.54944	3.41715	1.60034	-0.435661	-1.47414	-1.5473	-0.986154	0.84011		1	0.985435	1.0996e-05
	3.46739	3.7496	0.865988	-0.543657	-1.009	-1.06841	-1.06175	1.30333		1	1.10398	0.000714536
	4.05203	3.59397	1.26791	-0.466848	-1.63867	-1.11855	-1.57197	2.00953		1	1.16364	0.00393315
	3.13674	3.62455	1.41735	-0.746009	-0.911037	-1.02119	-0.359312	2.00625		1	1.10845	0.00081952
	3.39362	3.43288	1.25464	-0.489545	-1.55657	-1.38779	-1.42574	0.889221		1	1.01959	4.07899e-05
	4.42019	3.43738	1.37458	-0.442671	-0.93939	-1.05584	-1.52113	0.934525		1	1.21791	0.0148223
	3.35744	3.59496	1.54157	-0.498998	-1.19062	-1.36065	-1.48866	0.82884		1	1.08438	0.00038532
	4.26305	3.53892	1.24732	-0.776551	-1.21296	-0.808392	0.41803	1.57701		1	1.18743	0.0072213
	4.14438	3.64412	1.24108	-0.502608	-2.32371	-0.914757	-1.23539	1.51189		1	1.09426	0.000527983
	3.53856	4.03827	1.16545	-0.635647	-1.54453	-1.07886	-1.21964	1.27657		1	1.08675	0.000415805
	3.16333	3.9836	1.60593	-0.326923	-1.59787	-0.901289	-1.13485	0.98777		1	1.04269	9.42047e-05
	3.84648	3.75151	1.35736	-0.506989	-1.30936	-1.11934	-1.43908	1.1805		1	1.1075	0.000795929
	2.97927	3.99568	1.43378	-0.503072	-1.3341	-0.935344	-0.995442	1.7895		1	1.0851	0.000394346
	3.76395	3.89984	1.61049	-0.484663	-1.7807	-1.07747	-1.4637	1.50532		1	1.09831	0.000599388
	3.86832	3.75401	1.18708	-0.479246	-1.53775	-1.33024	-1.12987	1.42501		1	1.06455	0.000200354
	3.82172	4.04023	1.26693	-0.404376	-1.04379	-0.923551	-0.90663	1.51444		1	1.14231	0.00220243
	4.42278	3.07218	1.27044	-0.610654	-2.20161	-1.10701	-1.1193	0.929993		1	1.08105	0.000346044
	4.96318	3.56347	1.27008	-0.488075	-1.91361	-0.745559	0.41803	1.49675		1	1.26721	0.0412747
	4.1362	4.09366	0.818903	-0.402758	-1.15137	-1.24833	-1.05456	1.72488		1	1.22182	0.0161781
	3.63719	3.87125	1.46809	-0.5313	-2.27915	-1.41042	-1.38021	0.968781		1	1.07165	0.000254096
	4.2063	3.63533	1.14973	-0.409792	-1.74175	-1.06748	-1.24496	1.43114		1	1.09902	0.000612972
	3.74883	3.80764	1.1916	-0.627304	-1.73914	-1.18953	-1.09385	1.82862		1	1.07588	0.000292202
	2.81788	3.60913	0.779899	-0.472375	-0.892203	-1.36362	-1.36081	0.930312		1	1.14694	0.00250512
	3.21661	3.6142	1.74098	-0.33061	-1.29264	-1.05545	-1.23032	1.5258		1	1.03702	7.69872e-05
	4.33854	3.39276	1.33162	-0.668963	-2.32371	-1.08908	-1.17442	1.36952		1	1.09159	0.000485309
	3.52677	3.50199	1.75179	-0.490048	-1.66847	-0.9575	-0.955455	1.66862		1	0.984965	1.0793e-05
	4.16426	2.74764	1.2655	-0.88277	-1.7701	-1.12887	-1.4106	0.716055		1	1.09764	0.000587031
	3.0467	3.58131	1.5646	-0.574578	-1.62708	-0.910774	-1.10442	1.5909		1	0.987761	1.20569e-05
	3.47163	3.58659	1.07683	-0.510833	-2.32371	-1.02846	-1.29807	1.53774		1	1.02587	5.14256e-05
	3.8289	4.0925	1.68135	-0.427975	-1.2461	-1.16024	-1.50245	1.48893		1	1.17963	0.00594392
	3.10858	3.66442	1.54547	-0.565971	-1.22955	-0.830672	-1.40894	1.66523		1	1.08742	0.000424897
	3.88937	4.02146	1.19584	-0.789688	-1.5325	-1.2244	-1.45615	1.14138		1	1.15087	0.00279111
	3.39487	3.54942	1.44588	-0.348776	-1.27997	-1.28604	-0.919924	1.26698		1	0.986756	1.1587e-05
	2.83623	3.64272	1.25405	-0.522002	-1.36193	-1.12631	-1.06523	1.61986		1	1.02571	5.11264e-05
	3.50485	4.02836	1.70974	-0.345978	-1.8499	-1.27842	-0.948239	1.38065		1	1.03664	7.59383e-05
	3.23613	4.09366	1.12913	-0.638143	-1.74276	-1.5891	-0.846205	0.943686		1	1.06337	0.00019253
	3.02808	3.60659	0.395965	-0.432726	-1.66058	-1.02078	-1.05694	0.806966		1	1.08124	0.00034817
	3.36714	4.03355	1.65912	-0.927964	-2.15332	-1.10843	-1.19615	1.17242		1	1.07196	0.000256728
	2.9272	3.99985	1.17562	-0.504924	-2.15265	-1.08515	-1.13941	1.80695		1	1.07278	0.000263808
	3.11123	3.74836	1.12772	-0.49995	-1.83125	-1.08619	-0.0543256	1.91138		1	1.03125	6.25517e-05
	2.85045	4.09366	1.48016	-0.575849	-1.90431	-0.913147	-1.21018	1.35895		1	1.06639	0.000213186
	3.45458	3.99398	1.20078	-0.235305	-1.421	-1.44479	-0.928936	1.03502		1	1.06132	0.00017963
	3.31145	4.07278	1.60271	-0.410049	-1.46967	-1.02691	-1.20861	1.48422		1	1.08274	0.000365532
	3.62401	3.78805	1.62229	-0.580155	-1.2843	-1.06258	-1.75083	1.955		1	1.19063	0.00781299
	3.88898	3.60042	1.72487	-0.502095	-1.64672	-1.10802	-1.36859	1.53277		1	1.07001	0.000240604
	3.64169	3.63295	1.3244	-0.538759	-1.30676	-0.878663	-1.21629	1.9284		1	1.09782	0.000590432
	3.74895	4.11135	1.52345	-0.489242	-1.37657	-1.24367	-1.56671	1.82251		1	1.19319	0.00831531
	3.57476	2.94032	1.09405	-0.24069	-1.90537	-1.57366	-1.3269	1.04134		1	0.989026	1.26739e-05
	3.00531	3.13922	1.50037	-0.455611	-2.14884	-1.20071	-1.47074	0.969071		1	0.973219	6.73422e-06
	3.48212	3.57719	1.44339	-0.671312	-2.32371	-1.01221	-1.35127	1.37091		1	1.01551	3.50435e-05
	4.30434	3.60166	1.04349	-0.420925	-1.7957	-1.17921	-1.48081	0.8359		1	1.14848	0.00261388
	4.10811	3.31479	1.32608	-0.483657	-1.65809	-1.18738	-1.33704	1.80709		1	1.09195	0.000490781
	3.15494	3.70615	1.58333	-0.659746	-1.17193	-1.45871	-1.04075	1.20363		1	1.04047	8.70587e-05
	3.12898	4.03598	1.13861	-0.648916	-1.74599	-1.32109	-0.955754	1.29298		1	1.0403	8.65516e-05
	3.62398	3.21211	1.16701	-0.597154	-1.81082	-1.08147	-0.149693	1.09125		1	0.933803	1.28103e-06
	4.07671	3.56081	1.62053	-0.56374	-2.07393	-0.987267	-1.01187	1.53705		1	1.0405	8.71504e-05
	3.4989	3.60514	1.35542	-0.509274	-0.982946	-1.08543	-1.44088	1.04307		1	1.10564	0.000751998
	3.12733	4.09366	1.01848	-0.610849	-1.8595	-1.16448	-0.942488	1.61485		1	1.06682	0.000216293
	4.48094	3.85229	1.05112	-0.412242	-1.49609	-0.785029	-1.2909	1.35593		1	1.20146	0.0101392
	3.13956	3.45118	1.4722	-0.329224	-1.93967	-1.12891	-1.43613	1.57204		1	0.997108	1.73833e-05
	3.20741	3.13113	1.33317	-0.552741	-1.74977	-1.1113	-1.55391	1.3284		1	0.99449	1.57005e-05
	3.08052	3.64068	1.1266	-0.4898	-1.22899	-1.32693	-1.7738	1.53738		1	1.14063	0.00210117
	3.05697	3.98566	1.46492	-0.657362	-2.00344	-1.06784	-1.50311	0.939464		1	1.08244	0.000361991
	3.54043	4.00696	1.50663	-0.482776	-1.26102	-1.20995	-0.355986	0.966202		1	1.06321	0.000191513
	3.81704	3.83064	1.20416	-0.60058	-2.0693	-1.29847	-1.49754	0.951447		1	1.09911	0.000614606
	2.88393	3.35255	1.20798	-0.472782	-0.863606	-1.07549	-0.940538	1.04023		1	1.04516	0.000102767
	4.70347	3.7189	1.16768	-0.596967	-1.29393	-1.05938	-1.58901	0.981629		1	1.26721	0.0412767
	3.82743	3.95619	1.48323	-0.480107	-1.68529	-0.888166	-1.00891	1.07733		1	1.05959	0.000169392
	4.11537	3.18394	0.898161	-0.602327	-1.16856	-1.01562	-1.26964	1.58583		1	1.13359	0.0017213
	2.83482	3.90547	1.58349	-0.546042	-2.32371	-1.20273	-1.36738	1.88		1	1.09772	0.000588493
	4.4865	3.97254	1.21152	-0.646279	-1.33393	-1.18788	-1.15115	1.39977		1	1.21003	0.0123871
	4.4865	3.36684	1.17244	-0.466809	-0.980353	-1.50116	-0.9527	1.71804		1	1.20056	0.00992502
	4.93133	2.97756	1.43758	-0.373333	-1.45363	-1.44134	-1.73329	1.54661		1	1.28851	0.0609942
	4.17243	3.64144	1.48302	-0.28266	-1.2161	-1.08234	-1.47234	1.87546		1	1.18727	0.0071927
	4.19156	3.96292	1.074	-0.505064	-1.7265	-0.836415	-1.17878	1.2067		1	1.13982	0.00205428
	3.65435	3.58517	1.39381	-0.638182	-1.24034	-1.09321	-1.33149	1.32939		1	1.06689	0.000216825
	3.08789	3.67295	1.08368	-0.465559	-2.32371	-0.83469	-1.32404	1.59045		1	1.03861	8.14962e-05
	3.3122	3.67966	1.75706	-0.675428	-1.90472	-1.34558	-1.00557	1.55521		1	0.990051	1.31957e-05
	2.94604	3.22069	1.65072	-0.553621	-2.02396	-1.09719	-1.04358	1.93438		1	0.973629	6.84717e-06
	2.87881	3.24669	1.21362	-0.351002	-1.79542	-1.18143	-1.18516	1.51719		1	0.952502	2.85679e-06
	4.68515	4.0363	1.41402	-0.552666	-0.926936	-1.51922	-1.17946	1.35849		1	1.30002	0.0743579
	3.16023	3.81238	1.69735	-0.382434	-1.24929	-1.03835	-0.430401	1.3945		1	1.01771	3.80371e-05
	3.06817	3.42489	1.00347	-0.53238	-1.8456	-1.19022	-1.52399	1.30082		1	1.02347	4.70793e-05
	3.31341	3.96906	1.43612	-0.4885	-1.26464	-1.57989	-1.15272	1.5252		1	1.09668	0.00056961
	3.59324	2.8444	1.53019	-0.418005	-2.14431	-0.869574	-1.37356	1.35176		1	0.97456	7.11057e-06
	3.82022	3.70364	1.59974	-0.710776	-1.80382	-1.20356	-1.17129	1.50733		1	1.04416	9.92001e-05
	2.81788	3.76366	1.06742	-0.571946	-1.87071	-1.00787	-1.36968	1.56596		1	1.05569	0.000148195
	3.95768	3.49385	1.22601	-0.101122	-1.40838	-1.25465	-0.991644	0.752241		1	1.05545	0.000147
	3.78242	3.68251	0.489949	-0.874736	-1.12899	-1.1126	-1.45868	0.979467		1	1.20321	0.0105672
	4.20854	3.70805	1.09484	-0.562975	-1.07989	-1.29618	-1.5249	1.78087		1	1.22557	0.0175763
	3.31583	3.97866	0.893849	-0.594025	-1.49475	-1.15999	-0.927028	1.52916		1	1.07156	0.000253347
	3.65688	3.87562	1.31044	-0.605012	-1.18696	-1.16994	-1.68017	0.805125		1	1.169	0.00452703
	2.83303	3.05162	1.36375	-0.600728	-1.70544	-1.12483	-1.7227	1.17584		1	1.03729	7.77362e-05
	3.14083	3.49774	1.45895	-0.215568	-0.907839	-1.28023	-1.27694	0.832521		1	1.08364	0.000376247
	3.86935	3.30615	1.29105	-0.547042	-0.863606	-1.00643	-1.65648	1.68044		1	1.18555	0.0068928
	3.4305	3.97086	1.29296	-0.388612	-1.93825	-1.42043	-0.116599	1.51356		1	1.03297	6.65519e-05
	4.19948	3.61966	1.62869	-0.598226	-1.79635	-0.737869	-1.18695	1.53032		1	1.0996	0.000623987
	3.0913	3.6319	1.61186	-0.511009	-1.78803	-0.823301	-1.20493	1.43793		1	0.989611	1.2969e-05
	4.96318	3.6392	1.28783	-0.303019	-1.7629	-1.20251	-1.45951	1.11803		1	1.26321	0.0382297
	3.43533	3.59072	1.49672	-0.669129	-1.25005	-1.28087	-1.27268	1.17189		1	1.04148	9.02305e-05
	4.05856	3.98727	0.749882	-0.78751	-1.74305	-1.46134	-1.70733	1.51245		1	1.23612	0.0220725
	4.88404	3.97642	1.48406	-0.483704	-1.90032	-1.23172	-1.48242	1.77237		1	1.30163	0.076401
	3.17576	3.91428	1.18147	-0.420482	-1.80415	-1.29472	-0.898472	1.59397		1	1.01593	3.5593e-05
	3.30846	3.61937	1.13483	-0.666866	-1.15121	-1.2044	-1.6904	1.3661		1	1.12964	0.00153665
	3.53296	3.85232	1.58726	-0.417958	-0.909898	-1.01779	-1.40532	1.81859		1	1.17335	0.0050657
	4.302	3.97687	1.14426	-0.701867	-1.42297	-1.03843	-1.0395	1.36167		1	1.1672	0.00431935
	4.01242	2.98518	1.07768	-0.422965	-2.21107	-1.20143	-1.12765	1.09067		1	1.00371	2.24227e-05
	3.08516	3.56429	0.395965	-0.487024	-1.66245	-0.941664	-0.482087	1.56619		1	1.05729	0.000156591
	3.10444	2.93013	1.74322	-0.829465	-1.97228	-0.670402	-0.951735	2.00625		1	1.00252	2.14166e-05
	3.60543	4.03136	1.51248	-0.404395	-0.904976	-1.41738	-1.4977	1.44443		1	1.19538	0.00876835
	2.9199	3.62446	1.71241	-0.0318218	-1.71903	-1.05679	-1.06082	1.00989		1	0.981929	9.56358e-06
	3.57706	3.43433	1.49348	-0.503558	-0.979658	-1.32152	-1.39362	1.012		1	1.08963	0.000455999
	3.42942	3.38424	1.52404	-0.602613	-0.978403	-1.24206	-0.863431	0.746758		1	1.03458	7.05362e-05
	3.12501	3.80101	1.60738	-0.754763	-1.17372	-1.29107	-1.13806	1.92029		1	1.11067	0.000876524
	3.2767	3.5301	1.13551	-0.611464	-0.927361	-1.16711	-1.16099	1.80987		1	1.10687	0.000780832
	4.31839	3.13116	1.57034	-0.484871	-2.05928	-1.32043	-1.849	1.54237		1	1.1717	0.00485418
	3.65812	2.91802	1.63559	-0.474513	-0.914385	-1.56786	-1.03851	1.41598		1	1.06392	0.000196169
	3.52394	3.28699	1.17074	-0.625634	-2.00275	-1.0818	-1.42368	1.50041		1	1.00466	2.32461e-05
	4.82658	3.62777	0.812577	-0.504357	-1.6764	-1.5579	-1.4928	1.83759		1	1.30427	0.0798275
	2.92819	3.03942	1.45615	-0.737898	-1.31518	-1.42699	-1.18435	1.54523		1	0.998199	1.81341e-05
	4.04269	3.5566	1.04221	-0.316242	-0.863606	-1.14311	-1.85461	0.907109		1	1.24552	0.0268602
	4.1671	3.96363	1.5127	-0.668126	-1.31635	-1.246	-0.798762	1.2765		1	1.12908	0.00151213
	3.38876	3.45623	1.35956	-0.599324	-1.82187	-1.20512	-1.08429	1.57624		1	0.958666	3.69971e-06
	3.19731	3.03097	1.46416	-0.447976	-1.81529	-1.06087	-1.42733	1.19148		1	0.955706	3.26885e-06
	3.80889	3.77883	1.07508	-0.474985	-1.92256	-1.57838	-0.956681	1.86921		1	1.08564	0.000401336
	3.28251	4.03294	1.23615	-0.519869	-1.77203	-0.876442	-1.1292	1.49984		1	1.0562	0.000150803
	2.97576	3.56662	1.46312	-0.594308	-1.51548	-0.875747	-1.42599	1.88384		1	1.07117	0.000250075
	3.14872	2.86966	0.395965	-0.403711	-1.72572	-1.33489	-1.12499	1.16112		1	1.03584	7.38108e-05
	4.2909	3.2571	1.29518	-0.591881	-1.76252	-1.41262	-1.87093	1.36566		1	1.17948	0.005921
	3.09679	3.44594	1.66363	-0.476272	-1.59807	-1.53188	-1.06669	1.77173		1	0.999627	1.91634e-05
	3.24715	3.88481	0.982247	-0.272042	-1.7037	-1.13601	-0.941844	0.755658		1	1.03223	6.47973e-05
	2.83865	3.61576	1.25006	-0.619871	-2.20305	-1.03646	-1.26069	1.26604		1	0.998058	1.80353e-05
	3.7054	3.95432	1.43283	-0.34848	-2.09948	-1.07496	-1.24189	1.92416		1	1.10324	0.000698501
	2.81788	3.84768	1.18583	-0.426309	-1.72337	-1.4375	-0.974245	1.67602		1	1.03549	7.28763e-05
	4.20313	3.70115	1.76775	-0.641657	-1.01682	-0.912464	-1.8381	1.24232		1	1.2507	0.0298513
	3.10892	3.82234	1.40084	-0.694018	-1.27185	-1.20134	-0.894537	1.77527		1	1.05988	0.00017105
	3.10052	3.98704	1.19335	-0.510703	-0.979059	-1.51078	-1.04325	1.73002		1	1.14225	0.00219909
	3.33376	3.79702	1.30173	-0.460375	-1.76343	-1.35202	-0.958406	1.8545		1	1.02931	5.82978e-05
	3.5886	4.03382	1.66521	-0.533789	-1.72429	-1.15701	-1.04354	1.50352		1	1.06051	0.000174737
	3.05886	3.67435	1.31582	-0.473339	-1.19874	-0.879945	-1.51987	1.54359		1	1.09887	0.000610034
	4.96318	2.91699	1.44621	-0.77516	-1.25679	-1.50064	-1.02729	0.830907		1	1.24602	0.027138
	3.15733	2.68796	1.58905	-0.69764	-1.69616	-1.26314	-1.26512	1.74548		1	0.988826	1.25744e-05
	3.21674	3.79842	1.61053	-0.439922	-0.937631	-1.04601	-1.2736	1.56524		1	1.11584	0.0010241
	2.842	3.5974	1.12936	-0.378876	-1.56977	-0.999425	-1.29178	1.13314		1	1.01473	3.40337e-05
	3.26835	3.85811	1.13363	-0.403913	-1.55325	-1.57591	-1.52734	1.94713		1	1.14469	0.00235368
	3.04849	3.763	0.974088	-0.12315	-1.50865	-0.935187	-1.33146	0.767702		1	1.07453	0.000279491
	3.62464	3.60669	0.395965	-0.277264	-1.47161	-1.49053	-1.00768	0.711929		1	1.12414	0.00130924
	4.07236	3.92896	0.527081	-0.609829	-1.33447	-1.25499	-1.1601	0.74092		1	1.20467	0.0109344
	3.77792	3.64854	1.37718	-0.496302	-1.96956	-1.23095	-1.0481	1.35308		1	0.995476	1.63153e-05
	3.09432	3.64605	1.1791	-0.415776	-1.45353	-0.910069	-1.04423	1.82034		1	1.03251	6.54719e-05
	2.97056	3.55688	1.61994	-0.498436	-1.86724	-1.12854	-1.46598	1.17527		1	1.00645	2.48947e-05
	4.14687	4.04034	1.60916	-0.484491	-1.65202	-1.1156	-1.16446	1.50999		1	1.13916	0.00201621
	4.15166	3.57768	1.17436	-0.484872	-1.78426	-1.0254	-0.947747	1.38197		1	1.05113	0.00012662
	3.59844	2.98687	1.24578	-0.447312	-1.36105	-1.47638	-1.25935	0.798138		1	1.01259	3.14127e-05
	2.95519	3.41801	1.09523	-0.880491	-1.84824	-0.878623	-1.07115	1.19165		1	0.975778	7.46951e-06
	4.03801	3.77174	1.32697	-0.538205	-0.891073	-1.1374	-1.04488	1.35402		1	1.15219	0.00289285
	3.38932	4.02087	0.982716	-0.659816	-2.10208	-1.5891	-1.38463	1.02934		1	1.11035	0.000868136
	3.14607	4.06817	1.50346	-0.586278	-1.87753	-1.23294	-1.20284	0.895355		1	1.05669	0.000153387
	3.86895	3.49951	1.52111	-0.596159	-1.3089	-1.37001	-0.896656	0.821186		1	1.03674	7.6217e-05
	2.81788	3.85889	1.50061	-0.420609	-1.6198	-1.57697	-1.45216	1.01752		1	1.08013	0.00033575
	2.815	3.80764	1.23225	-0.526168	-1.86828	-1.10487	-1.74972	0.975551		1	1.10622	0.000765565
	3.84806	3.7888	1.30624	-0.497752	-1.91879	-1.35609	-1.21626	1.9679		1	1.10382	0.000711061
	3.9597	3.6181	1.3197	-0.629777	-0.899988	-1.14265	-1.20781	1.08723		1	1.13758	0.00192817
	3.57182	3.73287	1.03867	-0.619371	-1.79961	-1.09164	-1.40797	1.4695		1	1.06443	0.00019961
	3.96285	3.68454	1.58113	-0.625977	-1.90541	-1.23561	-0.813465	0.880315		1	1.01982	4.11414e-05
	3.7919	3.99169	1.58164	-0.598917	-1.42666	-1.08505	-0.841948	1.72644		1	1.09614	0.000560102
	4.24005	3.41347	1.09707	-0.553876	-2	-1.31251	-1.19222	1.92938		1	1.12194	0.00122753
	3.23333	3.06653	1.76725	-0.595648	-1.80146	-0.946589	-1.00303	1.03055		1	0.909145	4.27091e-07
	4.05809	3.95048	1.04313	-0.310816	-1.70926	-1.5891	-1.19214	1.67388		1	1.15144	0.0028346
	3.68105	3.48759	1.13088	-0.469865	-1.80318	-1.13654	-1.48437	0.903573		1	1.04319	9.58764e-05
	3.35159	3.80749	1.25404	-0.267131	-1.50022	-1.11138	-1.85061	1.51349		1	1.14399	0.00230872
	3.00862	3.39726	1.18873	-0.489015	-1.50185	-1.27135	-1.43956	1.81454		1	1.0516	0.000128697
	4.19061	2.92337	1.09351	-0.705302	-1.07016	-1.42993	-1.27308	1.39343		1	1.13864	0.00198677
	3.3429	3.92074	1.56167	-0.724001	-1.51781	-1.06162	-1.54891	1.05225		1	1.10106	0.000652918
	3.98188	4.03854	1.04299	-0.513207	-1.50607	-1.12625	-1.40277	0.829612		1	1.16374	0.0039434
	4.21966	4.09366	1.3278	-0.544475	-1.57777	-1.05076	-0.872252	1.77262		1	1.163	0.00386727
	3.04804	4.01394	1.1426	-0.446271	-1.17563	-1.03111	-1.28187	1.51611		1	1.11903	0.00112621
	3.0279	2.8039	1.2365	-0.412224	-1.6092	-1.34489	-1.15349	1.63479		1	0.959266	3.79337e-06
	3.68961	3.69457	1.46215	-0.590271	-1.76464	-1.49872	-1.52534	1.25249		1	1.07418	0.000276306
	3.54013	4.09366	1.16326	-0.545336	-1.36087	-1.13115	-1.49013	1.07391		1	1.14294	0.00224207
	4.41787	3.62972	1.00919	-0.605143	-1.70376	-1.07719	-0.957858	0.710679		1	1.13496	0.0017898
	4.06586	4.05086	1.65538	-0.239951	-1.85091	-1.5242	-1.22276	0.750126		1	1.14452	0.00234298
	4.14749	2.97443	1.55199	-0.499558	-1.73671	-1.18576	-1.51809	1.36782		1	1.07643	0.00029757
	2.99099	4.08697	1.30195	-0.59053	-1.7324	-1.5868	-1.02754	1.3462		1	1.0649	0.00020275
	3.05959	4.06368	1.23127	-0.62286	-1.35157	-1.58214	-1.16852	1.50017		1	1.10945	0.000844724
	3.05974	3.77388	0.92996	-0.12696	-1.15821	-1.06813	-0.817146	1.08923		1	1.05607	0.000150166
	3.89425	3.54788	1.70192	-0.462642	-1.64028	-0.984675	-1.85461	1.94194		1	1.18085	0.00612959
	4.32486	3.51496	1.25673	-0.466037	-1.24184	-0.747499	-1.11265	0.878798		1	1.13946	0.00203366
	3.67	3.80017	1.39219	-0.496849	-1.78127	-0.908506	-1.34341	1.69572		1	1.0733	0.000268366
	2.92314	2.74764	1.23268	-0.408804	-1.43644	-1.04555	-1.05443	1.1384		1	0.942178	1.84076e-06
	3.97868	3.61018	0.395965	-0.455829	-1.74376	-1.54741	-1.56669	1.77431		1	1.2174	0.0146532
	2.88386	4.05373	1.30307	-0.522814	-1.08225	-1.57343	-0.991735	1.56931		1	1.12736	0.00143817
	3.28318	3.78739	1.21031	-0.366115	-1.19517	-0.988848	-1.62162	1.32314		1	1.12252	0.00124872
	3.91042	3.64365	1.10763	-0.55383	-1.89336	-1.13525	-1.09342	1.33629		1	1.03252	6.54828e-05
	3.11872	3.63238	0.891012	-0.539187	-2.06379	-1.07606	-1.20827	1.46959		1	1.01365	3.26826e-05
	3.61603	3.58098	1.61601	-0.632492	-1.58145	-1.07129	-1.15677	1.33921		1	1.00465	2.3244e-05
	4.07415	4.06315	0.84903	-0.30977	-1.27396	-1.46365	-0.997586	1.03221		1	1.17682	0.00553562
	3.44174	4.03452	1.18849	-0.475706	-1.17332	-0.932688	-1.48865	1.91667		1	1.18608	0.00698505
	3.98626	3.62307	1.55587	-0.454291	-1.47607	-0.670402	-1.4579	1.61981		1	1.12551	0.00136303
	3.2991	4.0306	1.76725	-0.575509	-1.01964	-1.22516	-0.916534	1.47318		1	1.11224	0.000919232
	4.05888	3.69345	1.20594	-0.472047	-1.85953	-1.31932	-0.821738	1.2028		1	1.03513	7.19321e-05
	4.93868	3.5448	1.43689	-0.927964	-1.88438	-1.1867	-1.54937	0.826473		1	1.27914	0.0515597
	4.14186	3.2823	1.41125	-0.300209	-1.07096	-1.10735	-1.3039	1.70294		1	1.13827	0.00196636
	2.98614	3.32968	1.37716	-0.51837	-1.64537	-0.885678	-1.63454	1.30019		1	1.03302	6.66725e-05
	3.21607	3.98058	1.31133	-0.518292	-1.81948	-0.669911	-0.286889	1.36407		1	1.01595	3.56203e-05
	3.42128	3.99518	1.65831	-0.447386	-1.35276	-1.37423	-0.895675	0.747894		1	1.06883	0.000231341
	3.81346	3.61679	1.25471	-0.6113	-1.15372	-1.09389	-1.06824	1.78268		1	1.10121	0.000656105
	3.81597	3.92053	1.28851	-0.497827	-1.00584	-1.52677	-0.911483	1.09919		1	1.12826	0.00147653
	4.21158	3.67815	1.41866	-0.568941	-1.18048	-1.4852	-1.22154	1.95076		1	1.19147	0.00797367
	3.50284	3.6284	1.21092	-0.603629	-1.42707	-1.49458	-1.40996	0.788111		1	1.07236	0.000260166
	3.14735	3.41551	0.992795	-0.466305	-1.86394	-1.09955	-1.55656	1.52884		1	1.03779	7.91254e-05
	2.99216	3.77652	1.24007	-0.546324	-1.26632	-1.08263	-0.945222	1.4297		1	1.02964	5.89994e-05
	3.8184	3.12125	1.33328	-0.768487	-1.14757	-1.14035	-0.812318	1.42908		1	1.02591	5.14941e-05
	3.16272	2.81821	1.21734	-0.60852	-1.75245	-0.943449	-0.986091	0.94876		1	0.911425	4.7366e-07
	3.48937	3.70384	1.16162	0.0632186	-1.21561	-1.14544	-1.41479	0.998211		1	1.10333	0.000700456
	3.5694	3.60362	1.52005	-0.43264	-1.149	-1.086	-1.29223	1.19075		1	1.06164	0.000181571
	3.14091	3.29898	1.2772	-0.510569	-1.51323	-1.14571	-1.16422	1.96706		1	1.01813	3.86383e-05
	3.89098	3.65974	1.24779	-0.588555	-1.64651	-1.14941	-1.35236	1.60953		1	1.08206	0.000357474
	3.61887	3.7075	0.742289	-0.908208	-0.935256	-1.30493	-1.51724	1.06145		1	1.19841	0.00943029
	2.90598	3.81848	1.17506	-0.489043	-1.29733	-0.670402	-1.38668	1.54856		1	1.10514	0.000740502
	4.12622	2.98348	1.26848	-0.77128	-1.23337	-1.24668	-1.3793	1.40708		1	1.11128	0.000892974
	3.06591	3.58016	1.31465	-0.516452	-1.65563	-1.01721	-1.53009	0.710679		1	1.04886	0.000116992
	3.24312	2.74764	1.61381	-0.702495	-1.73714	-1.16762	-1.53959	1.40405		1	1.0035	2.22434e-05
	3.27501	3.6017	1.73944	-0.510831	-1.62817	-1.22406	-1.1123	0.710679		1	0.995468	1.63101e-05
	3.55016	3.72779	1.63834	-0.406894	-1.37211	-1.10855	-1.82963	1.64317		1	1.15493	0.00311643
	2.95462	3.4166	1.02397	-0.513458	-1.91863	-1.5891	-1.50747	2.00625		1	1.09675	0.000570843
	3.4405	3.75195	1.63792	-0.58346	-1.57817	-1.4669	-1.09758	1.5234		1	1.02676	5.31181e-05
	3.08063	2.91008	1.13278	-0.538944	-1.91985	-0.892809	-0.871242	1.72887		1	0.930597	1.11344e-06
	3.03195	2.95635	1.76725	-0.768406	-1.82887	-0.79781	-1.16725	1.52408		1	0.961404	4.14599e-06
	4.17528	3.9949	1.34888	-0.662151	-0.898638	-1.05561	-1.2926	0.986767		1	1.22155	0.0160825
	3.10691	4.09366	1.20051	-0.486974	-1.48471	-0.892662	-0.993023	1.60163		1	1.07821	0.000315448
	3.57449	2.74764	1.00912	-0.721672	-1.74262	-1.10432	-1.36681	1.57525		1	1.02172	4.41371e-05
	3.90274	3.55578	1.09535	-0.110648	-1.47117	-0.998978	-1.29466	1.29169		1	1.07444	0.00027872
	3.50253	3.99946	1.58284	-0.592	-1.64025	-1.1029	-1.47242	1.37325		1	1.09807	0.000594927
	3.73687	3.54056	1.07191	-0.867559	-1.46367	-1.33031	-1.17908	1.16476		1	1.0533	0.000136502
	4.04019	4.02747	1.25476	-0.517825	-1.22847	-1.12283	-1.85461	1.52082		1	1.24891	0.0287865
	3.5895	3.82861	1.06668	-0.399446	-1.40401	-1.01709	-1.38201	1.18443		1	1.08896	0.00044627
	3.80159	3.76699	1.00736	-0.542785	-1.31577	-1.57795	0.200501	1.78594		1	1.14673	0.00249057
	3.00832	2.88511	0.966066	-0.406323	-1.46023	-1.08733	-0.864619	1.72123		1	0.971413	6.25723e-06
	4.4092	3.64023	1.47774	-0.469117	-1.90537	-1.15362	-0.383597	1.60647		1	1.09649	0.000566283
	3.11628	4.08238	1.0126	-0.522347	-1.13336	-1.56399	-1.71813	1.72395		1	1.2269	0.0180959
	3.25094	3.95492	1.47443	-0.581005	-1.58782	-1.22773	-1.49288	1.43358		1	1.08884	0.000444552
	3.84925	3.63253	1.10309	-0.558355	-1.5637	-1.00647	-1.2587	1.79588		1	1.09161	0.000485508
	3.48029	3.65058	1.11907	-0.581481	-2.2255	-1.14878	-1.31605	1.44398		1	1.02484	4.95151e-05
	4.17415	3.42522	1.19937	-0.558364	-1.56347	-1.0307	-1.17162	1.32384		1	1.07157	0.000253404
	3.22824	3.63471	1.12435	-0.614137	-1.07409	-0.764823	-1.02899	1.89228		1	1.10027	0.000637144
	3.32124	4.09366	1.50151	-0.489756	-1.63227	-1.18673	-1.1391	0.77652		1	1.07116	0.000250032
	2.93945	4.04831	1.58649	-0.673785	-1.3168	-0.860834	-0.978467	1.02669		1	1.07609	0.000294209
	3.70498	3.18725	1.74185	-0.57761	-1.90044	-0.90321	-1.09583	0.842701		1	0.965122	4.83529e-06
	3.29569	3.90113	0.395965	-0.699989	-1.13937	-1.15098	-1.12851	1.64203		1	1.18381	0.00660151
	3.51579	3.52731	1.48161	-0.421595	-1.24764	-1.11767	-1.51673	0.905416		1	1.07423	0.000276712
	3.90069	4.07232	0.395965	-0.446819	-1.57555	-1.10621	-1.13958	1.3561		1	1.19165	0.00800876
	2.93163	2.93075	1.00253	-0.608012	-1.73279	-1.13232	-0.169034	1.54983		1	0.936208	1.42237e-06
	3.38166	3.53008	0.958208	-0.047905	-1.33333	-1.41733	-0.820522	1.1902		1	1.01366	3.26922e-05
	3.82837	3.99563	1.18108	-0.186776	-1.7853	-1.38973	-1.01211	1.6888		1	1.0967	0.000570054
	3.95911	3.05771	1.14126	0.0133017	-1.99108	-1.21746	-1.49921	1.84135		1	1.09702	0.000575707
	2.99353	3.65856	1.144	-0.721289	-1.37015	-1.5891	-1.07222	1.71568		1	1.06101	0.000177733
	2.99551	4.01382	1.12493	-0.927964	-1.3675	-0.847364	-1.58094	1.95428		1	1.19839	0.00942546
	2.86961	3.79422	1.2621	-0.681897	-1.60684	-1.57464	-1.10144	1.93313		1	1.08333	0.000372478
	2.94832	3.05344	1.27419	-0.523193	-1.22473	-1.20649	-1.78678	0.710679		1	1.1045	0.000726256
	3.42919	3.65963	1.27877	-0.633981	-1.16915	-1.1402	-1.18976	0.764234		1	1.06456	0.000200485
	3.95222	3.60056	1.52091	-0.410254	-1.61061	-1.08595	-1.64942	1.65402		1	1.12685	0.00141716
	4.17954	3.71204	1.14708	-0.601676	-1.40343	-1.11281	-0.89251	1.37615		1	1.09898	0.000612201
	3.45828	3.75451	1.60681	-0.54416	-1.66592	-1.57964	-1.50217	1.42153		1	1.07694	0.000302554
	3.12032	2.96281	1.49569	-0.662366	-1.78539	-1.38673	-1.56277	1.30701		1	0.997636	1.77431e-05
	3.76409	3.82986	1.56371	-0.612203	-1.78921	-1.56751	-1.45151	1.92401		1	1.13944	0.00203248
	3.14788	3.69651	1.0805	-0.152072	-1.58655	-1.01892	-1.04024	1.60477		1	1.01449	3.37301e-05
	3.16926	3.39732	0.880783	-0.927964	-1.93038	-1.36425	-1.60754	1.76054		1	1.10252	0.000683182
	3.09831	3.67148	1.4499	-0.643518	-2.18167	-1.05007	0.14706	1.37724		1	0.987663	1.20103e-05
	2.97065	4.0496	1.41315	-0.589776	-1.83044	-1.10144	-1.77033	0.801529		1	1.14612	0.00244931
	3.12052	3.90215	0.867309	-0.501522	-1.24372	-1.18033	-1.20725	1.64842		1	1.11356	0.000956578
	3.15882	3.58698	0.872815	-0.65498	-1.60514	-1.35481	-1.10715	1.29282		1	1.01169	3.03586e-05
	3.58382	3.71173	1.41339	-0.115182	-1.59532	-1.45219	-1.25766	1.85947		1	1.08025	0.000337068
	3.42079	3.60674	1.58974	0.0632186	-2.06343	-1.16613	-1.76445	1.65676		1	1.10783	0.000804139
	3.41658	3.76076	1.59061	-0.500011	-2.02837	-1.15638	-0.99543	1.51824		1	0.983933	1.03591e-05
	3.21688	3.50738	0.865732	0.0632186	-1.76237	-1.11516	-1.48238	1.40869		1	1.06129	0.000179463
	4.31199	3.46779	1.41709	-0.754174	-1.72504	-0.957399	-1.1651	1.76752		1	1.12125	0.00120283
	4.07869	4.05762	1.77299	-0.395509	-0.986165	-1.03344	-1.36145	1.2149		1	1.21129	0.0127513
	3.54802	4.05713	1.26866	-0.450088	-1.14244	-1.04138	-0.89106	1.19327		1	1.09616	0.000560443
	3.26833	3.98935	0.989182	-0.505835	-1.2828	-1.0986	-0.982758	1.1168		1	1.0756	0.000289519
	3.14164	3.98845	1.12663	-0.509796	-1.03008	-1.06739	-1.11328	0.951036		1	1.11242	0.0009241
	2.89085	3.19536	1.48729	-0.620366	-1.4854	-1.14728	-1.08657	1.53426		1	0.958832	3.72531e-06
	4.61181	3.61652	0.714165	-0.710307	-1.75324	-1.2661	-1.20086	1.97707		1	1.24867	0.0286491
	3.68327	3.7457	1.18246	-0.510424	-1.06637	-1.03795	-1.15736	1.59232		1	1.10889	0.00083053
	3.39744	4.03662	1.35317	-0.442323	-1.81545	-1.14947	-1.67778	1.52682		1	1.12902	0.00150943
	3.34162	3.90853	1.75955	-0.461115	-1.86601	-1.10822	-1.31213	1.35873		1	1.04385	9.81394e-05
	3.05508	3.59091	1.13339	-0.538605	-1.29973	-1.1204	-1.26362	1.6727		1	1.05363	0.000138046
	3.62062	3.98027	0.947635	-0.306566	-1.88341	-1.16708	-1.30608	1.5647		1	1.0992	0.000616253
	4.90417	3.98009	1.45753	-0.487744	-1.94552	-1.30257	-1.39696	1.17146		1	1.27618	0.0488379
	3.10705	3.75326	1.09535	-0.551684	-1.78202	-1.24593	-1.53466	1.54108		1	1.07076	0.00024667
	3.15452	3.21394	1.76725	-0.462062	-1.76399	-1.5891	-1.15866	0.983365		1	0.950774	2.65562e-06
	3.41418	4.05326	1.07649	-0.568713	-2.32371	-0.777723	-1.17791	0.990306		1	1.08239	0.000361344
	2.91474	2.83932	1.43278	-0.435903	-1.7422	-1.06336	-0.979312	1.58003		1	0.915511	5.69639e-07
	3.70372	3.5727	1.55623	-0.297096	-1.22754	-0.861172	-1.54678	1.20888		1	1.10252	0.000683112
	3.15442	2.95611	1.59319	-0.647229	-0.863606	-1.20983	-1.20299	1.4461		1	1.05634	0.000151533
	4.82099	3.61684	1.29041	-0.199845	-1.74165	-1.18389	-1.19052	1.58844		1	1.21783	0.0147974
	3.484	4.00026	1.44221	-0.468533	-1.28255	-1.08151	-1.38029	1.16128		1	1.10768	0.000800537
	3.65393	3.17834	1.49832	-0.746081	-0.863606	-1.14022	-1.33661	1.40848		1	1.10298	0.000692858
	3.12366	4.01968	1.53763	-0.591378	-1.48317	-1.10825	-1.02887	0.824589		1	1.05414	0.000140495
	3.44143	3.88908	1.10146	0.075239	-1.55302	-1.06942	-1.38019	1.64286		1	1.10817	0.000812506
	3.18689	3.44642	1.29931	-0.496347	-1.40327	-1.29101	-1.20645	1.46523		1	0.993871	1.53262e-05
	4.18578	3.25624	1.56124	-0.410886	-1.44956	-0.889302	-0.944491	0.810951		1	1.05215	0.000131136
	4.18323	3.52413	1.05672	-0.407562	-1.93139	-1.02743	-1.36484	1.06404		1	1.09394	0.000522725
	3.26719	3.77968	1.50766	-0.810674	-1.56085	-1.27295	-0.999748	1.28233		1	1.00747	2.58753e-05
	3.88448	2.95457	1.35718	-0.408658	-1.95208	-1.33051	-1.23554	0.710679		1	0.999655	1.91843e-05
	3.19193	3.91135	1.35536	-0.421833	-1.81611	-1.32206	-1.5987	0.97422		1	1.08516	0.000395219
	3.79995	3.6212	1.14449	-0.296634	-1.64813	-1.30493	-0.113255	0.85831		1	1.01932	4.03941e-05
	4.28367	3.85467	0.815055	-0.467514	-1.22235	-1.23683	-1.18776	0.718379		1	1.20444	0.0108761
	3.65581	4.04119	1.21723	-0.507258	-1.33984	-1.04339	-1.42595	1.51275		1	1.14115	0.00213232
	3.30651	3.58232	1.73956	-0.731279	-1.32216	-1.30447	-1.5137	1.66076		1	1.09404	0.000524383
	3.31638	3.37236	1.31819	-0.652446	-0.970991	-1.56772	-1.55025	0.96154		1	1.11399	0.000969005
	3.38477	3.87723	1.19037	-0.702647	-1.19936	-1.18374	-1.60566	1.22443		1	1.13969	0.00204673
	3.39438	4.00241	1.49953	-0.515004	-1.42596	-1.45122	-1.47435	1.2093		1	1.11078	0.000879481
	3.30092	3.65559	1.55381	-0.510289	-1.78507	-1.24239	-1.21924	1.57366		1	0.997925	1.79428e-05
	3.62959	2.97536	0.395965	-0.610924	-1.16344	-1.57597	-1.04775	1.34244		1	1.11817	0.00109794
	4.17547	3.74444	1.57339	-0.514272	-1.48613	-1.02202	-1.09809	1.56806		1	1.10932	0.000841493
	3.49277	3.15626	1.53111	-0.659023	-0.956099	-1.23729	-1.22666	0.986881		1	1.05201	0.000130505
	3.61345	3.58109	1.16828	-0.0428601	-1.79375	-1.13928	-1.49051	1.67976		1	1.07345	0.000269753
	2.95806	3.44312	1.52723	-0.0769466	-1.87268	-1.01942	-1.48293	1.41421		1	1.00995	2.84351e-05
	2.83954	3.54582	1.0853	-0.482688	-1.95222	-1.03927	-1.18748	1.66778		1	1.003	2.18192e-05
	3.16019	3.81086	1.71702	-0.927964	-1.39903	-1.03757	-1.41483	2.00625		1	1.14235	0.00220517
	3.34976	3.83103	1.13034	-0.319908	-1.60621	-1.19588	-1.14985	1.92714		1	1.07457	0.000279894
	3.84503	3.88402	1.0941	-0.476528	-1.72388	-1.57678	-1.51092	1.49618		1	1.13818	0.00196138
	4.84589	3.41733	1.45109	-0.699862	-1.1526	-1.10515	-1.27029	0.819086		1	1.25231	0.0308356
	4.81304	3.8824	1.33976	0.0632186	-1.65782	-1.23403	0.245525	0.817385		1	1.25988	0.0358321
	3.55096	2.93707	1.32788	-0.52964	-1.30151	-0.885879	-1.53122	1.35368		1	1.0489	0.000117145
	3.13835	3.9901	1.65657	-0.349099	-1.00454	-1.24815	-1.77185	1.47072		1	1.19904	0.00957135
	3.98832	3.93041	1.25837	-0.563808	-1.15287	-0.983233	-1.40186	1.70536		1	1.18672	0.00709556
	3.62168	4.01393	0.705011	-0.452549	-1.8932	-1.2518	-1.18902	1.96642		1	1.15378	0.00302107
	3.9891	3.35899	1.47514	-0.511509	-0.872096	-1.24056	-0.995017	1.85627		1	1.1391	0.00201262
	3.71851	4.05993	1.19422	-0.525962	-0.937591	-1.11193	-1.44046	1.12924		1	1.19132	0.00794615
	3.10684	3.58311	1.29514	-0.657941	-1.45175	-1.03563	-1.25234	1.3944		1	1.0125	3.13068e-05
	4.00345	3.81812	1.08908	-0.495162	-2.32371	-1.25236	-1.20555	1.70401		1	1.11242	0.000924195
	3.47058	3.58649	1.07246	-0.678635	-0.863606	-0.749996	-0.945872	1.5203		1	1.1077	0.000800898
	3.13126	3.31452	1.05689	-0.511711	-1.6711	-1.00455	-1.01326	1.47361		1	0.948111	2.37204e-06
	3.05915	3.97008	1.61344	-0.500738	-1.73028	-1.5891	-1.46632	1.22212		1	1.08895	0.000446235
	4.30442	3.49201	1.10939	-0.534429	-1.34291	-1.04351	-0.850025	1.52306		1	1.10884	0.000829285
	3.28072	3.59369	1.21284	-0.337869	-1.6632	-1.04363	-1.28365	0.972127		1	0.997673	1.77682e-05
	3.05709	3.64746	1.37712	0.0632186	-1.00187	-1.1371	-1.29875	1.89838		1	1.13293	0.0016891
	3.82409	4.06408	1.59018	0.0632186	-1.20228	-1.15092	0.41803	1.53989		1	1.18874	0.00745827
	4.17616	3.71769	1.39266	-0.415415	-1.41255	-1.29274	-0.330153	1.5789		1	1.09301	0.000507522
	3.65041	4.09366	1.13628	-0.60247	-0.94047	-1.50438	-1.01131	1.30792		1	1.16538	0.00411746
	4.09283	3.19835	1.06495	-0.792692	-1.5871	-1.19484	-1.25623	1.88957		1	1.11217	0.000917252
	3.17517	3.56783	1.29186	-0.662621	-1.86826	-1.096	-0.986392	1.668		1	0.969966	5.89857e-06
	4.26743	3.76545	0.395965	-0.487463	-1.59095	-1.12103	-1.24263	1.02462		1	1.20485	0.0109808
	3.70967	3.32481	1.1416	-0.446793	-1.66704	-1.12448	-1.36363	1.8978		1	1.06115	0.000178628
	3.75489	3.8177	1.30392	-0.591808	-1.63801	-0.771661	-1.05079	1.61211		1	1.0627	0.000188274
	2.83832	3.70718	1.37982	-0.458723	-1.43897	-1.18554	-1.48858	0.963558		1	1.0636	0.000194045
	4.22912	3.91942	1.20124	-0.402899	-1.23969	-0.730554	-1.53926	1.68936		1	1.2301	0.0194001
	4.12522	3.62731	1.7162	-0.60486	-1.76593	-1.5891	-1.48881	1.81325		1	1.1579	0.00337561
	3.03764	3.39952	0.858358	-0.677917	-1.01864	-1.23057	-1.45549	1.61001		1	1.12212	0.00123404
	3.67969	4.09366	1.46147	-0.630361	-1.63768	-1.03753	-1.63559	1.52258		1	1.15862	0.00344149
	3.54298	3.69325	1.04791	-0.487672	-1.32177	-1.05	-1.2706	1.44404		1	1.06896	0.000232377
	3.53707	3.62081	1.16668	-0.443261	-0.929	-1.11851	-0.419236	2.00625		1	1.11553	0.00101485
	3.23576	3.14982	1.60626	-0.695834	-1.4628	-1.11512	-1.06631	1.81134		1	0.988638	1.24816e-05
	3.26832	3.79797	1.21665	-0.401122	-0.919786	-0.967555	-1.36209	1.80282		1	1.15261	0.00292652
	3.09012	3.69309	0.470301	-0.51293	-2.17206	-0.970406	-1.08314	1.42706		1	1.07048	0.000244397
	3.13039	3.16197	1.48121	-0.481773	-1.63007	-1.30207	-1.85461	1.32408		1	1.06639	0.000213197
	2.88737	2.96573	1.16578	0.0632186	-2.27715	-1.11545	-1.11506	1.5734		1	0.96571	4.95386e-06
	4.09986	4.0924	0.847195	-0.456557	-1.94537	-0.897146	-1.44312	1.09856		1	1.18496	0.00679363
	3.83084	3.53992	1.39592	0.0632186	-1.45454	-1.09199	-1.40945	1.59201		1	1.09238	0.000497619
	4.2509	2.74764	1.29891	-0.710247	-1.73192	-1.07818	-0.942879	0.850218		1	1.04211	9.22738e-05
	3.20095	2.84777	1.02213	-0.413558	-1.52825	-0.980322	-1.30998	1.4192		1	0.986526	1.14819e-05
	4.24198	3.39516	0.984906	-0.713436	-1.74333	-1.08378	-1.50868	1.50148		1	1.13992	0.00206005
	4.11064	3.88837	1.11747	-0.698464	-1.52926	-1.52792	-1.15045	1.5442		1	1.14547	0.00240561
	3.52862	3.66266	0.993359	-0.476998	-1.3749	-1.11949	-1.46422	1.37911		1	1.08601	0.00040608
	3.38239	3.74209	1.19551	-0.573903	-1.59239	-1.52076	-1.46734	1.11782		1	1.06616	0.000211509
	3.15251	3.59181	1.68426	-0.587725	-1.99164	-1.08946	-1.35163	0.710679		1	1.01176	3.04439e-05
	4.04585	3.07336	1.28321	-0.429992	-2.32371	-0.937198	-1.82272	0.835662		1	1.12825	0.0014761
	3.12437	4.0584	1.14748	-0.616055	-1.79863	-1.57151	-1.40195	1.97953		1	1.15159	0.00284623
	3.01569	3.29534	1.16436	-0.528882	-1.4614	-0.832725	-1.85461	1.53916		1	1.10864	0.000824166
	4.15504	3.56101	1.28355	-0.493917	-1.51634	-1.33024	-1.64363	1.56271		1	1.1563	0.00323401
	4.1363	3.77443	1.26636	-0.602225	-1.86322	-1.17102	-1.45285	0.801581		1	1.12957	0.00153337
	3.95415	3.63295	1.43183	-0.380361	-1.79381	-1.22522	-1.37139	1.23253		1	1.05831	0.000162129
	3.96218	3.57577	1.61734	-0.478171	-1.70816	-1.46788	-1.12313	1.07755		1	1.03562	7.32101e-05
	3.15445	3.79176	1.18966	-0.84936	-2.05857	-1.2027	-1.44308	1.07473		1	1.0567	0.000153428
	3.46073	4.03391	1.56358	-0.648799	-1.69293	-1.1299	-1.16343	0.895688		1	1.06323	0.00019163
	4.19073	3.62904	1.12697	-0.656797	-1.74452	-1.48567	-1.15788	0.977814		1	1.09906	0.000613718
	3.28135	3.44222	0.741129	-0.485016	-1.47784	-1.12156	-1.29763	0.882247		1	1.04607	0.000106114
	4.22058	3.38112	1.36676	-0.67224	-1.82353	-1.21259	0.41803	1.12236		1	1.10014	0.00063459
	4.18199	3.62521	1.56057	-0.547334	-1.35439	-1.13605	-1.4739	0.78241		1	1.14802	0.00258078
	4.43879	2.88041	1.26846	-0.450145	-1.82021	-1.15058	-0.98508	1.62359		1	1.08329	0.000372037
	3.65312	4.05895	1.76209	-0.186499	-1.95674	-1.1201	-1.10381	1.66061		1	1.08485	0.000391273
	3.88857	3.62285	1.25763	-0.411395	-1.00085	-1.22622	-1.28003	1.21181		1	1.11965	0.00114722
	4.47031	3.43045	1.29012	-0.699168	-1.48189	-1.19381	-1.85461	1.54711		1	1.23529	0.0216848
	3.34342	3.62607	1.55509	-0.0783236	-1.75163	-1.19817	-1.47141	1.37412		1	1.03212	6.45568e-05
	2.83969	2.84812	1.60946	-0.341079	-1.8266	-1.31805	0.41803	1.11994		1	0.978649	8.38586e-06
	4.3075	3.94784	1.73437	-0.479358	-1.6005	-1.32665	-1.1359	0.94974		1	1.15105	0.00280461

## Sheet: 5-FU
	Simulated Signatures									Algorithm output					correction prediction:
shRNA's:	p53	Chk2	ATR	Chk1	ATX	DNAPKcs	Bok	Bim		class	LR	p-value			4 = Nucleotide Depletion Agent
	1.78618	0.636806	-0.487912	-2.04924	0.114947	0.530383	1.67096	1.58086		4	0.954482	0.0110002
	2.2003	0.977918	-0.196466	-1.36525	-0.0535014	0.594417	1.57293	0.914244		4	1.00922	0.0301809
	2.96184	0.635171	-0.791182	-1.51741	0.475958	0.305674	1.82075	1.29276		4	1.02758	0.0409405
	2.67	1.14972	0.108402	-2.25783	0.142812	0.874619	1.49694	0.235949		4	1.08819	0.0996645
	2.11401	1.3007	0.0508348	-1.94963	-0.297673	0.752152	1.64749	1.52991		4	1.04531	0.0540909			99% correct classification
	1.75075	1.30986	-0.6379	-2.43027	0.783612	0.554415	2.24701	1.60868		4	1.07523	0.0836232
	2.77595	1.15211	-0.381701	-1.89297	0.458107	1.13348	1.11824	1.5299		4	0.991432	0.0221041
	2.74191	1.21373	-0.468616	-1.81345	0.327815	0.188464	1.44405	1.35109		4	1.00054	0.0259774					Experimental Data
	2.92712	0.59438	-0.131083	-2.15071	0.186997	0.146033	2.30671	1.26428		4	1.09899	0.114656				shRNA's:	p53	Chk2	ATR	Chk1	ATX	DNAPKcs	Bok	Bim
	2.96777	1.04716	-0.255718	-1.98033	0.658968	0.77872	0.460645	1.78326		4	0.971104	0.0151868			Replicates	1	2.00777	0.533642	-0.251194	-2.23065	0.296097	0.907524	1.63647	1.57068
	1.95075	0.627083	-0.569234	-2.33873	-0.260475	1.19285	2.36281	1.51434		4	1.09041	0.102621				2	1.71225	1.23013	-0.231608	-1.74157	0.0893286	0.610578	2.51793	1.20738
	2.04285	1.28104	0.0765019	-1.76644	0.450725	0.32916	1.8305	1.63867		4	1.03416	0.0454781				3	1.66833	0.947875	-0.628474	-2.29943	0.342443	0.722797	1.97311	1.37283
	2.18653	0.876984	0.0645671	-2.01985	0.262489	0.562885	1.54494	1.64292		4	0.983077	0.0189921				4	2.27684	1.19391	-0.945407	-2.38446	0.450057	0.572031	1.96127	1.32816
	1.70793	1.2578	-0.452463	-2.37388	0.2439	0.55183	1.82271	1.55249		4	1.01794	0.0349553				5	1.78429	1.14304	-0.477222	-1.92785	0.207965	0.740833	2.20012	1.19486
	1.91626	1.18042	-0.00780773	-1.75334	0.375278	0.421644	1.34803	1.46618		4	0.967951	0.014301				6	2.64229	1.30148	-0.314598	-2.43027	0.147005	0.556122	2.41411	1.39433
	1.86067	0.904723	0.00693688	-1.75757	0.246988	0.696832	1.67879	1.56784		4	0.990646	0.0217943				7	2.01699	1.17268	-0.32983	-1.80929	0.0813815	0.511558	2.08048	1.76425
	1.98722	0.914864	0.083993	-2.15863	-0.300674	0.590942	1.57152	1.25105		4	1.01189	0.0315835				8	1.96931	1.08442	-0.480208	-1.74246	0	0.546442	2.12553	1.41805
	1.9757	0.985998	-0.206611	-1.97394	0.261019	0.783002	1.42865	1.50958		4	0.95916	0.0120625				9	2.52774	0.610578	0.245942	-2.21988	0.388772	0.571588	1.0742	1.31952
	1.4113	0.989155	0.0696125	-2.26521	0.0328854	0.822819	2.39475	1.70336		4	1.11076	0.132748				10	1.68762	0.603741	-0.173534	-2.23767	0.454985	0.750053	1.69833	0.965349
	2.37334	1.10741	-0.689278	-2.32807	0.369665	0.729186	1.7661	0.357306		4	1.05384	0.0615149				11	2.01075	0.540603	0.31394	-1.89812	0.783612	0.360412	1.08933	0.235949
	2.23399	1.06019	-0.781586	-1.78381	-0.0255393	0.748571	1.72054	1.26658		4	0.999188	0.025368				12	2.00718	1.15715	0.206559	-2.10173	0.0599418	0.808409	1.49703	1.45924
	1.77164	1.14386	0.188177	-1.78859	0.0188379	0.523943	1.77246	1.23885		4	1.03373	0.0451703				13	1.58256	1.59069	-0.202971	-1.99088	0.196423	0.521587	1.55346	1.22982
	1.75603	0.533642	-0.156091	-1.19553	0.0143462	0.408795	1.36697	0.643921		4	0.990244	0.0216372				14	2.0098	1.14479	-0.00886833	-1.80614	0.218937	0.680984	1.54524	1.63934
	3.22055	1.07052	0.149498	-1.54214	-0.0147738	0.54077	1.94965	1.46294		4	1.11968	0.1477				15	1.8888	1.12484	-0.218572	-1.74817	-0.124174	0.322893	1.41896	0.747953
	2.98035	0.790166	-0.280601	-2.17159	0.0838413	0.558509	1.96852	0.744422		4	1.07848	0.0874528				16	2.13382	0.977514	0.0876755	-2.32266	0.183296	0.69474	1.61883	1.38657
	1.37545	0.956442	0.0551601	-2.34216	0.187027	0.42691	1.54187	1.73624		4	1.00164	0.0264801				17	1.34989	0.817842	0.0634533	-1.62177	-0.0167601	0.0803154	1.58237	1.00315
	2.93441	0.912227	-0.758162	-1.91305	-0.0299225	0.845151	1.7761	1.32725		4	1.04116	0.0507456				18	1.74009	1.45584	-0.430121	-1.52294	0.782972	1.19285	2.04466	1.41257
	1.75288	0.55043	-0.112114	-1.58712	0.479957	0.844622	0.460645	1.42024		4	0.887373	0.00258923				19	2.28552	1.62745	0.0675897	-1.71049	0.450331	0.750248	2.26437	0.499255
	2.07748	1.15662	-0.893135	-1.72284	-0.173471	0.961278	1.64384	1.77008		4	1.01521	0.0333963				20	1.97361	0.984955	-0.216473	-1.31828	-0.00833959	0.972407	2.4114	1.25772
	1.69054	1.15103	-0.416472	-2.26246	0.115156	0.85287	1.85566	1.59173		4	1.02201	0.0373893				21	2.11318	0.992945	-0.121046	-1.37364	-0.281696	0.770564	2.39888	1.52929
	1.83892	1.1758	-0.384855	-2.29625	0.285489	0.172864	2.44067	1.41575		4	1.09155	0.104162				22	1.7352	0.802822	-0.397664	-1.19553	-0.136819	0.831798	2.27185	1.32698
	2.61589	1.07885	-0.343033	-1.30836	0.443016	0.515571	2.31695	1.33179		4	1.09499	0.108927				23	2.65361	1.11026	0.0399722	-2.13724	-0.0926472	0.769696	1.60408	1.69705
	1.69004	1.14569	0.017525	-2.07593	-0.246369	0.453409	1.58327	1.55401		4	1.01656	0.034162				24	2.90325	1.16302	-0.0685765	-1.77441	-0.352237	0.864087	1.96686	1.57721
	2.0462	1.16474	0.0190224	-2.42256	0.0937601	0.600944	1.56415	0.891437		4	1.02387	0.0385444				25	2.42256	0.54121	-0.522766	-1.64582	-0.22495	0.218451	0.460645	1.24193
	2.0929	1.06324	0.21554	-1.74958	0.00892244	0.543706	0.460645	0.913928		4	0.963501	0.0131267				26	3.22055	0.754738	-0.00206136	-1.77609	-0.753722	0.523123	1.70345	1.52319
	1.75923	0.927546	-0.016453	-1.85821	0.718786	0.659804	1.46451	1.34796		4	0.96216	0.0127897				27	2.91717	1.1005	-0.356124	-1.93776	-0.264361	0.436476	1.52692	1.8221
	2.27188	1.13714	-0.048111	-1.76434	0.408591	0.178016	1.6784	1.46966		4	1.00621	0.0286631				28	2.86945	0.664185	0.0604617	-1.776	-0.176459	0.476791	1.38815	1.62235
	2.32373	0.533642	-0.217169	-2.37416	0.479725	0.383464	1.01313	1.34514		4	0.916688	0.00501255				29	2.14742	1.07695	-0.037912	-1.85053	0.307266	0.631757	1.96634	1.46173
	2.02101	1.62601	-0.253913	-1.46857	-0.189434	0.707269	1.3865	1.47982		4	1.03506	0.046133				30	2.97549	1.13651	-0.107895	-1.89048	0	0.883158	1.07774	1.44501
	1.81581	1.151	-0.265273	-2.18536	-0.79722	0.674107	2.09653	1.23824		4	1.10424	0.122499				31	2.3357	1.08917	-0.325073	-1.89048	0.248016	0.970515	1.35883	1.25122
	2.06186	0.916704	0.121555	-1.79385	-0.0267844	0.725991	2.53301	1.19676		4	1.11962	0.147591
	2.68069	1.59331	-0.218149	-2.11185	0.219819	0.966334	2.32326	1.10463		4	1.14437	0.194778
	1.61487	1.10432	0.0370733	-1.33234	0.625102	0.794914	1.60664	0.484041		4	1.04316	0.0523432
	2.28978	1.21705	0.015855	-1.88322	-0.0110841	0.751453	0.938102	1.55481		4	0.973659	0.0159385
	1.54704	1.37295	0.0486679	-1.45749	0.484614	0.218109	1.20848	1.62227		4	0.98803	0.0207885
	2.15178	0.83618	0.0326046	-2.18908	0.783529	0.389678	2.06872	1.47866		4	1.03995	0.0498016
	3.22055	1.04695	-0.302859	-1.63861	-0.177187	0.54163	1.68826	1.26583		4	1.07781	0.0866551
	2.92877	0.533642	-0.61819	-1.74005	0.183548	0.822233	1.53578	1.50375		4	0.99472	0.0234418
	1.39529	0.603088	-0.406237	-1.73813	0.399343	0.702833	1.45522	1.25396		4	0.940358	0.00827129
	2.47768	1.04077	-0.369168	-2.15426	-0.158333	0.770801	2.09614	1.4209		4	1.06471	0.0721076
	1.67065	1.15265	-0.203128	-1.82952	-0.18143	0.691335	2.25883	1.22782		4	1.08319	0.093228
	1.9989	0.912111	0.202712	-1.19553	0.419013	0.792686	2.00773	1.06717		4	1.06572	0.0731499
	2.94622	1.16356	0.00312378	-1.70092	0.24496	0.51162	1.36455	0.435307		4	1.06367	0.0710366
	1.41132	1.09295	-0.127997	-2.16326	0.126385	0.924658	1.52154	1.22186		4	1.00146	0.0263973
	2.27751	1.14263	-0.421288	-1.79985	0.0121597	0.707149	1.49107	1.37446		4	0.982888	0.0189262
	2.73485	1.62745	-0.339923	-1.94452	-0.157667	0.538216	1.56899	1.22298		4	1.06801	0.0755759
	1.70312	0.787034	0.0557673	-1.91043	-0.427553	0.579923	2.4079	1.63893		4	1.10759	0.127693
	3.15005	0.595357	-0.174117	-1.766	0.653199	0.396556	2.09881	1.0663		4	1.08676	0.0977917
	2.12938	0.613189	0.0152215	-1.80903	-0.251828	0.836952	1.68621	0.759894		4	1.02696	0.0405326
	2.91485	0.99872	-0.298656	-1.50643	0.452224	0.967779	1.78533	1.57001		4	1.05165	0.0595434
	2.40436	1.03969	-0.857022	-2.0628	0.198184	0.663422	0.460645	1.60979		4	0.915003	0.0048316
	2.01214	1.50499	-0.0159641	-2.32977	0.0800583	0.966838	1.60347	1.30537		4	1.04948	0.0576308
	2.73099	1.01045	-0.186133	-1.58986	-0.239127	0.711087	1.55988	1.38844		4	1.03159	0.0436632
	1.51853	1.01529	-0.46735	-1.99	0.203633	1.12078	1.62069	1.41242		4	0.993102	0.0227752
	1.36406	0.552006	-0.128978	-1.88805	0.361997	0.760663	1.41894	1.42734		4	0.949771	0.0100137
	2.01655	0.752624	-0.0496307	-1.76663	0.00102807	0.82319	2.06459	1.39657		4	1.03812	0.0484077
	2.11055	1.1501	0.161746	-1.86399	-0.146006	0.962908	1.48707	1.43754		4	1.02471	0.0390739
	1.7258	0.970689	-0.361518	-2.2412	0.210133	0.92762	1.94388	1.78679		4	1.02601	0.0399078
	2.11046	1.43672	0.0384123	-2.27483	0.120477	0.576869	2.06131	0.455521		4	1.11583	0.141117
	2.49348	1.11937	0.0489289	-2.29308	0.0140728	0.712995	1.53808	1.28161		4	1.02496	0.0392327
	2.62234	0.935617	-0.325518	-1.82865	-0.21009	0.497921	1.68432	1.51919		4	1.01776	0.03485
	2.95825	1.5896	0.0523772	-1.8482	0.0753485	0.284296	2.33106	1.56576		4	1.16475	0.239801
	2.0612	1.10955	0.00604618	-2.12223	0.324069	0.456548	2.36718	1.34882		4	1.08782	0.0991723
	1.97461	1.59484	0.056551	-1.71955	-0.189075	0.487118	2.35728	1.71926		4	1.14104	0.187938
	2.07672	1.16041	0.0119122	-1.75994	0.2984	0.724909	0.922483	1.8221		4	0.95508	0.0111313
	1.79389	0.735126	-0.00632995	-1.81302	0.391664	0.425385	0.599979	1.57137		4	0.895201	0.00310229
	2.19442	0.705841	-0.381875	-2.38972	0.374984	0.682795	2.35987	1.48921		4	1.06389	0.0712644
	2.92341	0.796713	-0.0537977	-2.16095	0.209811	0.789603	1.62576	1.0267		4	1.03642	0.0471306
	2.06022	1.00292	-0.151009	-1.73492	0.221232	0.757426	1.87198	1.47442		4	1.01345	0.0324229
	2.00492	0.99148	-0.313214	-1.75304	0.251507	0.791309	1.98403	0.478578		4	1.05547	0.0630246
	1.40309	1.26563	-0.0696915	-1.50617	0.315107	0.250485	1.68794	1.47641		4	1.01945	0.0358444
	1.97798	1.14749	0.0681489	-1.76674	0.649034	0.110809	1.67047	1.33438		4	1.00666	0.0288844
	2.82016	1.03621	-0.475744	-2.0135	-0.0978391	0.753656	1.41042	0.235949		4	1.06321	0.070568
	2.02358	1.09555	0.31394	-1.63884	0.575247	0.501997	2.18655	0.810348		4	1.09449	0.108216
	1.64672	1.02814	0.210578	-1.77053	0.520649	0.684877	1.64868	1.53331		4	1.00631	0.0287129
	1.95475	1.15705	-0.245886	-1.48846	0.278105	0.66535	1.08385	1.76633		4	0.949254	0.00991027
	1.76062	1.16374	0.0154929	-1.85616	0.0665933	0.566076	1.83157	1.50342		4	1.02677	0.0404028
	1.79523	1.16272	-0.336286	-1.96925	0.257995	0.533672	1.09885	1.70609		4	0.935912	0.0075453
	2.50105	1.23136	-0.142786	-1.59628	-0.188897	1.1209	1.54871	1.52955		4	1.04623	0.0548587
	3.22055	0.553291	0.0282602	-2.01759	0.783369	0.448988	1.08805	1.31332		4	1.00643	0.0287704
	3.05908	1.1482	-0.256055	-1.19553	-0.0425196	0.876495	1.60218	1.33515		4	1.07731	0.086056
	1.57535	0.682056	-0.288964	-1.85641	0.343681	0.927825	2.05672	1.7306		4	1.0239	0.0385605
	2.87179	1.21246	-0.380179	-2.15918	-0.480325	0.419855	2.34768	1.24268		4	1.14456	0.195174
	1.93218	1.44138	-0.0601508	-2.37878	0.356552	0.449306	1.56635	0.653205		4	1.04276	0.0520192
	3.09711	1.22733	-0.167122	-1.87428	-0.219016	0.835992	1.5104	0.555918		4	1.0974	0.112355
	1.98207	0.559762	-0.232085	-2.34602	-0.0813532	0.483672	1.99927	1.44512		4	1.01595	0.0338131
	1.76242	1.10939	0.31394	-1.41551	-0.283244	0.763402	2.03013	1.67329		4	1.09732	0.112236
	3.09976	0.94193	-0.0579394	-1.70738	0.00442636	0.668687	1.47525	1.53521		4	1.04332	0.0524654
	2.71594	0.563924	-0.290603	-1.86061	0.451932	0.771037	1.37499	1.33715		4	0.96229	0.0128219
	2.9005	0.922523	0.243344	-2.06204	0.502451	0.834628	1.78233	1.3214		4	1.0652	0.0726107
	2.68148	0.536428	-0.82956	-1.72056	0.0921387	0.627446	1.49218	1.41297		4	0.967075	0.0140628
	2.9386	0.750979	-0.873884	-2.41205	-0.08234	0.908835	1.56913	1.5154		4	1.02865	0.0416495
	2.8834	1.12005	-0.446385	-1.76818	0.241318	0.541334	1.08556	1.56504		4	0.979803	0.0178786
	1.72126	1.3608	-0.194891	-1.7758	0.276726	0.855852	2.40469	1.8221		4	1.11061	0.132503
	1.66372	0.602642	-0.226851	-2.0026	0.322527	0.313232	1.08546	1.59997		4	0.90387	0.00377583
	2.42944	1.52046	-0.00500888	-2.11962	-0.125718	0.605881	1.65196	1.27434		4	1.06201	0.0693528
	2.32812	1.38644	0.176193	-1.19553	-0.753722	0.626459	2.20171	1.40755		4	1.16904	0.249951
	1.96653	0.674352	-0.629854	-1.7754	0.783378	0.646457	1.58979	1.23255		4	0.94447	0.00899674
	2.58944	0.988671	-0.260768	-1.65664	-0.000544799	0.70398	2.18998	1.40856		4	1.07507	0.0834441
	2.91684	1.11209	0.263371	-1.75347	0.722771	0.558033	1.26376	1.57123		4	1.02913	0.0419766
	1.34989	0.581093	-0.477958	-2.39751	0.416634	0.426604	1.41178	1.57402		4	0.942241	0.00859689
	1.86139	0.843346	-0.527052	-2.41152	0.385158	0.488584	1.01174	1.613		4	0.909373	0.00426859
	1.67337	1.03189	-0.945407	-1.89636	0.020724	0.537665	2.28455	1.78974		4	1.06291	0.0702614
	2.87664	1.36562	-0.443085	-1.59251	-0.0234599	0.494058	2.30551	1.24567		4	1.12777	0.162208
	1.85786	0.955766	-0.100459	-1.7683	0.26707	0.617618	1.48099	1.45632		4	0.962521	0.0128798
	2.1365	0.595743	-0.283469	-2.05527	0.142496	0.649602	1.83798	1.56808		4	0.98556	0.0198756
	2.06866	1.0138	-0.0447964	-1.88215	-0.183746	0.566756	2.11377	1.40785		4	1.06013	0.0674854
	3.18602	0.994537	-0.163648	-2.1916	-0.211832	0.959041	0.68791	1.54687		4	1.02874	0.041712
	2.4167	0.591284	-0.325345	-2.21745	-0.753722	1.05783	1.90536	1.3882		4	1.07331	0.0814231
	2.28507	1.59209	0.236638	-1.86191	-0.0764103	1.02747	2.18245	0.99903		4	1.14477	0.195616
	2.60016	0.746006	-0.391638	-1.89324	0.0099213	0.418632	1.21522	1.45053		4	0.949514	0.00996223
	1.97682	0.794482	-0.388123	-1.97806	-0.409309	0.476807	1.0422	0.813877		4	0.961817	0.0127047
	1.70821	0.594028	-0.182874	-2.25075	0.332945	0.573909	1.75687	1.43359		4	0.97608	0.0166805
	2.79648	1.24347	0.0207398	-1.19553	0.0637041	0.934561	1.74087	1.6295		4	1.08718	0.0983372
	2.56854	1.1201	0.0468744	-1.87379	0.0377522	0.159737	1.13802	0.997285		4	0.998086	0.0248812
	2.69049	0.698943	-0.78208	-1.58211	-0.253671	0.390581	2.29957	1.8221		4	1.09066	0.102963
	2.23776	0.914617	0.0331836	-1.73812	0.397292	0.447747	1.08928	1.55141		4	0.940902	0.00836422
	2.36035	1.12881	-0.288262	-1.71673	0.395155	0.47556	0.752756	0.480333		4	0.96492	0.0134918
	2.93414	1.16168	-0.249988	-1.40825	0.406069	0.107191	1.81968	1.57072		4	1.0662	0.0736549
	2.30552	0.536195	-0.609184	-1.79814	-0.273889	0.871688	2.34442	1.07937		4	1.07768	0.0864972
	1.91829	0.551165	-0.177147	-2.08281	-0.232026	0.9918	1.70399	0.235949		4	1.05959	0.0669537
	3.22055	0.614522	-0.423999	-1.46275	0.405078	0.605041	2.32411	1.23182		4	1.11771	0.144307
	1.72665	1.15941	-0.306424	-1.6125	0.181948	0.432909	2.21085	1.48983		4	1.05803	0.065445
	1.95709	1.11422	0.160765	-2.43027	0.667797	1.19285	1.48567	1.2887		4	1.02604	0.0399316
	2.56148	0.747764	0.0530596	-2.36482	0.239624	0.754772	1.08693	1.37101		4	0.968471	0.0144439
	2.50001	1.11856	-0.0217622	-1.7944	-0.140086	0.818367	1.555	1.81357		4	1.03212	0.0440276
	1.66083	0.660192	-0.422227	-1.98337	0.396833	0.601911	2.19288	1.51888		4	1.02314	0.0380846
	2.55871	0.533642	-0.350043	-2.43027	0.150749	1.19285	2.03083	1.62591		4	1.05682	0.0642932
	2.23304	1.09543	-0.0936707	-1.75179	-0.107072	0.982885	0.514806	1.26189		4	0.956998	0.0115611
	3.04843	1.00029	-0.582197	-2.3904	0.424065	0.306976	2.47174	1.32773		4	1.13374	0.173482
	2.1858	1.04896	-0.38827	-2.37581	-0.197209	0.59336	1.91314	0.947211		4	1.04596	0.0546352
	2.05161	0.828504	0.0514664	-1.92657	0.211465	0.602589	2.22879	0.752984		4	1.07548	0.0839188
	2.11854	1.06474	-0.39925	-2.33771	-0.183858	0.959973	1.61426	1.44587		4	1.01148	0.0313608
	3.22055	0.75692	-0.0585919	-1.85622	0.416708	0.562205	1.32605	1.64411		4	1.02435	0.0388465
	1.7857	0.533642	-0.357088	-2.33531	0.27915	0.710509	1.03862	1.35289		4	0.904589	0.00383715
	1.83909	1.45717	-0.322939	-1.70717	-0.259599	0.185745	2.2456	1.3667		4	1.10228	0.119521
	2.36459	1.05772	-0.566269	-1.87589	-0.10523	0.667897	1.11058	1.30597		4	0.952006	0.0104718
	2.37869	0.763773	-0.178461	-1.72876	0.326638	0.800138	1.91988	1.76791		4	1.0206	0.0365275
	1.71728	1.42583	-0.265474	-1.77266	0.397653	0.526389	1.38828	1.33099		4	0.979079	0.0176397
	1.90877	0.534921	-0.433242	-1.76705	0.183978	0.545706	1.04152	1.75096		4	0.896812	0.00321859
	1.63186	1.0725	-0.192715	-2.14094	0.439753	0.914037	1.04448	1.86703		4	0.95097	0.0102571
	1.89496	0.677622	-0.144814	-2.34419	0.643416	0.942917	1.40256	1.2409		4	0.958619	0.0119354
	1.9957	1.57634	-0.491524	-1.48424	-0.0645369	0.907013	1.96877	1.26457		4	1.07888	0.087935
	1.70196	1.62488	-0.0982046	-1.4555	0.181529	0.627205	1.54538	1.37649		4	1.03525	0.0462714
	1.64123	1.1133	-0.310462	-1.47207	0.0620897	1.08592	0.898994	1.45157		4	0.954969	0.0111069
	1.90498	0.752366	-0.628314	-1.77758	0.783184	0.799453	1.14973	1.32996		4	0.903272	0.00372544
	1.90245	1.18388	-0.161204	-2.02198	0.698758	0.522197	1.56946	0.472243		4	1.01934	0.0357747
	1.68887	1.14331	-0.292833	-2.14544	0.281499	0.357901	2.39414	1.39334		4	1.08073	0.0901804
	2.01037	1.10371	-0.219561	-1.81148	-0.113976	0.527875	1.56591	1.31186		4	0.99086	0.0218783
	1.34989	1.18603	-0.588207	-1.79725	0.0135233	0.375524	1.08544	1.139		4	0.951745	0.0104173
	2.81364	1.14401	0.0114447	-1.83298	0.268311	0.710546	1.45389	1.77558		4	1.02857	0.0415987
	1.70026	0.983973	-0.484268	-2.06326	0.402748	0.785451	2.27847	1.25684		4	1.05341	0.0611263
	1.99399	1.22073	-0.290726	-1.81018	0.00518445	0.531303	1.75953	1.10081		4	1.01539	0.0334973
	2.67118	1.04006	-0.251545	-1.90346	-0.020591	0.490808	1.61042	1.81833		4	1.01939	0.0358084
	2.04979	1.17211	0.00152893	-2.00182	-0.00103071	1.06804	1.45005	1.54747		4	1.01018	0.0306763
	1.72831	1.27822	-0.30071	-1.19553	0.198145	0.353057	2.34041	1.30595		4	1.09903	0.114711
	2.62987	1.38433	0.0407569	-1.76006	0.206814	1.07012	1.43946	1.41829		4	1.04379	0.052851
	2.90093	0.591799	-0.0209177	-1.88796	0.35003	0.573493	1.56477	1.26087		4	1.00874	0.0299341
	1.85628	1.14203	-0.175458	-2.15925	0.142113	0.917257	0.848669	1.48113		4	0.943682	0.00885347
	1.34989	1.10385	-0.405841	-1.85389	-0.291227	0.782943	1.7306	1.64716		4	1.027	0.0405594
	2.01197	0.71326	0.0989692	-2.34421	0.783612	0.516916	1.57373	1.29929		4	0.983766	0.0192338
	1.61156	0.959151	-0.223799	-1.78746	-0.0270686	0.517352	2.51793	1.58398		4	1.09906	0.114752
	1.6875	1.01002	0.170451	-1.78141	0.110174	0.753501	1.54469	1.43168		4	1.00028	0.0258577
	1.64313	1.07	-0.0930538	-1.75585	-0.287101	0.365015	1.40476	0.91902		4	1.00336	0.0272845
	1.73161	1.14055	-0.544654	-2.17643	-0.178017	0.755557	1.26853	1.30476		4	0.968327	0.0144042
	1.72555	0.709385	0.0650762	-1.36945	-0.20245	0.674438	1.44872	1.30236		4	0.993917	0.0231089
	2.28073	1.22032	-0.0346201	-1.80775	0.340822	0.440724	2.31641	1.29877		4	1.08961	0.10154
	2.07681	1.12552	-0.51019	-2.30656	-0.231521	0.753828	2.27921	1.35632		4	1.08449	0.0948769
	2.4552	1.30216	-0.403842	-1.74798	-0.0360735	0.647938	2.272	1.37187		4	1.09395	0.107467
	3.02008	1.11122	0.246359	-1.75269	0.0365831	0.702551	2.39301	1.64784		4	1.15946	0.227595
	2.62302	1.04569	-0.329629	-1.58858	-0.226692	0.727395	1.23603	0.235949		4	1.0515	0.0594086
	1.78508	1.14704	-0.749657	-1.77348	0.653034	0.796991	1.9461	1.54918		4	1.01438	0.0329354
	2.71416	1.19807	-0.234108	-1.85257	-0.0425252	0.534863	1.39719	1.24365		4	1.0115	0.031374
	1.99544	1.39799	-0.945407	-1.69071	0.0681044	0.768125	1.98543	1.54354		4	1.05045	0.0584745
	2.41985	0.53878	-0.176276	-1.28273	-0.651995	0.482242	2.43624	1.40582		4	1.13216	0.170461
	2.47627	1.25595	-0.256595	-2.23522	0.255836	0.597355	2.21366	0.997577		4	1.08912	0.100895
	1.97663	0.501933	0.0187552	-2.0712	-0.162487	0.473928	2.07426	1.28307		4	1.03662	0.0472772
	3.03521	1.18349	-0.14393	-1.68485	0.164522	0.335063	1.2809	1.74519		4	1.0305	0.0429065
	2.72544	0.602614	-0.605311	-2.43027	0.379242	0.822533	2.41416	1.52296		4	1.09396	0.107482
	2.35803	1.04548	0.0135612	-1.75907	-0.299111	0.919606	1.56412	1.64637		4	1.03233	0.0441797
	1.85702	1.38582	-0.476425	-1.69148	0.250411	0.791263	1.07221	1.27506		4	0.953838	0.0108606
	2.35357	1.10746	0.266968	-1.96166	0.0271057	0.572322	1.42205	1.39931		4	1.01346	0.0324285
	3.13381	0.886426	-0.768099	-1.75674	0.254196	0.737636	1.96887	1.33266		4	1.06915	0.0768083
	1.93726	0.931636	-0.0588657	-1.90633	0.239696	0.552389	1.24846	1.42249		4	0.942121	0.00857585
	1.67399	1.10743	0.0117739	-1.34504	-0.753722	0.886404	1.08876	1.39235		4	1.04076	0.050433
	1.34989	1.07894	-0.0753689	-1.84853	0.163523	0.738751	1.90721	1.70646		4	1.03729	0.0477811
	2.55713	0.983107	-0.253909	-1.84529	0.0181797	0.754505	2.51793	1.41268		4	1.11612	0.141593
	2.23009	1.14965	0.0805496	-2.38779	-0.339705	0.959927	1.67846	1.31327		4	1.06042	0.0677696
	2.47181	0.538056	-0.278162	-2.24049	0.187556	1.08273	2.37938	0.792827		4	1.10144	0.118266
	2.4385	1.22868	0.0308079	-1.59407	0.378629	0.818219	1.60067	1.32736		4	1.02344	0.038274
	2.30998	0.826045	-0.375514	-2.26004	-0.182135	0.532231	1.59456	1.66438		4	0.988197	0.0208514
	1.68872	1.01901	0.161369	-1.92373	0.401187	0.918901	1.35861	1.34803		4	0.981331	0.018391
	2.88724	1.13765	-0.150984	-1.63381	0.00424373	0.676104	1.43888	1.44899		4	1.0291	0.0419506
	2.62753	0.830965	0.147544	-1.97071	-0.0330409	0.734018	2.04732	0.567308		4	1.09915	0.114883
	2.26112	1.05158	0.0497186	-2.43027	0.298827	0.86859	1.40782	0.92736		4	1.0095	0.0303261
	2.13384	1.44273	-0.388977	-1.82733	0.783457	0.555447	1.25629	1.8221		4	0.976671	0.0168659
	2.86204	1.0923	-0.439307	-2.12363	0.421498	0.585296	1.62822	1.44958		4	1.01842	0.0352353
	2.72069	0.539971	-0.359185	-2.24759	0.0678796	0.530367	1.44555	1.43903		4	0.974378	0.0161558
	2.44173	1.10785	-0.421926	-2.38602	0.0247236	1.19285	1.97401	1.62219		4	1.06943	0.0771136
	1.92364	0.758939	-0.308481	-1.80031	0.783612	0.474206	1.65067	1.16842		4	0.961171	0.012546
	3.09414	1.15534	-0.350627	-1.83081	-0.171282	0.604333	2.35048	1.42335		4	1.1405	0.186848
	2.21151	0.978446	-0.180427	-2.36575	0.0318678	0.160569	2.04876	0.856569		4	1.06123	0.0685762
	1.90359	1.13841	-0.332987	-2.23037	0.0124283	0.811641	1.9396	0.564833		4	1.06304	0.0703975
	1.72042	0.656284	-0.00272208	-1.89053	0.168488	0.558962	1.32801	1.50494		4	0.942194	0.00858854
	1.97285	1.07165	-0.13432	-2.26361	0.195976	0.300874	0.460645	1.64791		4	0.923045	0.00575054
	1.7624	1.11939	0.0473396	-1.67638	-0.195459	1.19285	1.33576	1.8221		4	1.02396	0.0385994
	3.0809	1.62745	-0.0234486	-1.62193	0.0291273	0.785628	1.3926	1.56776		3	1.22343	0.440063
	2.8311	0.955198	0.0556297	-1.81285	0.403449	0.573724	1.74363	1.09415		4	1.04298	0.0521957
	3.22055	0.735234	0.00786565	-2.28886	-0.19672	0.489723	1.55281	1.06949		4	1.0716	0.0795097
	2.90909	0.538321	-0.530675	-1.84996	-0.58966	0.512838	2.31145	1.58053		4	1.11571	0.140904
	2.92755	1.02897	-0.408811	-1.73598	-0.119991	0.65497	2.01269	1.41549		4	1.07704	0.0857429
	1.69234	0.543092	-0.283769	-1.76242	0.177252	0.64358	1.39824	1.47665		4	0.930063	0.00667589
	1.61288	1.41526	-0.262594	-1.73858	0.224163	0.795803	2.40386	1.37559		4	1.1077	0.127861
	2.18454	1.01419	-0.00351545	-1.81906	0.303598	0.375165	2.3515	1.4918		4	1.08107	0.090596
	2.93517	1.4303	-0.290825	-1.67652	0.201827	0.672914	2.05071	1.79868		4	1.10801	0.128342
	1.72833	1.46358	-0.277441	-1.99274	0.207995	0.797576	1.51798	1.40562		4	1.00539	0.0282627
	1.86487	1.17283	-0.0411642	-2.35099	0.250408	0.744667	2.42393	1.56927		4	1.10596	0.125142
	1.34989	1.00252	-0.211256	-1.91669	0.108365	0.763012	1.97903	1.18577		4	1.03667	0.0473196
	1.76142	1.43547	0.31394	-2.24131	-0.0379492	0.780618	2.31631	1.04135		4	1.14101	0.187887
	1.7753	1.12476	0.31394	-1.39805	-0.280396	0.68398	1.51527	1.57883		4	1.04463	0.0535379
	2.95475	1.1608	-0.2509	-1.64078	0.136648	0.361431	2.35869	1.4565		4	1.12493	0.15702
	2.08669	1.13998	0.0277036	-1.78496	0.122723	0.638145	1.46666	1.49822		4	0.990064	0.0215669
	1.63312	1.32801	-0.261041	-2.0148	0.388802	0.686727	1.32561	1.05855		4	0.975119	0.0163825
	2.54134	1.22876	-0.481454	-1.30477	0.194837	0.812808	1.49629	1.75441		4	1.01725	0.0345565
	2.43888	1.11244	0.0775933	-1.86875	0.233821	0.678703	1.53239	1.3679		4	1.00757	0.0293399
	1.3162	0.805683	-0.0778658	-1.75367	-0.0853179	0.360044	1.13271	1.45551		4	0.953567	0.0108024
	1.34989	0.849624	0.262917	-2.05069	-0.23481	0.731243	1.14944	1.45981		4	0.995856	0.0239196
	1.84087	0.533642	0.0277374	-1.88916	-0.198135	0.107068	1.51911	1.47701		4	0.97806	0.0173088
	2.02465	0.533642	0.27894	-1.75274	0.209419	0.863059	2.08843	0.838798		4	1.06613	0.0735842
	1.92628	1.255	-0.620925	-1.73127	0.213277	0.485265	2.13575	1.70131		4	1.04843	0.0567227
	2.06878	0.835413	0.0259743	-1.93647	0.383343	0.712457	1.64588	0.531778		4	1.01811	0.035055
	2.00048	1.14616	-0.329024	-1.72861	0.0107416	0.759331	1.57281	1.11905		4	0.992852	0.022674
	2.14805	1.23405	-0.0881691	-1.85594	-0.252595	0.182212	1.28962	1.38462		4	0.99735	0.0245602
	2.10437	0.765811	-0.217945	-1.91605	0.240633	0.628472	2.39309	1.639		4	1.06742	0.0749539
	2.2036	1.09452	-0.15652	-1.81169	-0.270898	0.505287	1.44246	1.21284		4	0.997568	0.0246551
	2.36918	1.28522	0.212928	-1.39328	0.411657	0.586175	0.460645	0.235949		3	1.18616	0.288124
	1.86013	1.13922	-0.11085	-1.746	0.105444	0.654582	2.37047	1.68783		4	1.09005	0.10213
	2.04174	0.734121	-0.486352	-1.74286	-0.753722	0.544071	2.51793	1.26389		4	1.12597	0.158908
	2.03039	1.42908	0.038811	-1.86707	-0.173926	0.941306	2.05845	1.02555		4	1.10096	0.117558
	1.91565	1.08348	-0.193966	-1.89969	0.258257	0.824252	1.35334	1.67789		4	0.963071	0.0130179
	2.11247	1.1833	-0.139172	-1.40455	0.147005	0.711821	1.37204	1.63792		4	0.987564	0.0206138
	1.74967	1.30264	-0.337204	-2.1771	0.177597	1.03551	1.46017	1.53093		4	0.998156	0.0249118
	2.09346	1.16664	-0.13741	-2.42137	-0.126215	0.92708	1.98361	1.6813		4	1.06846	0.0760621
	1.67933	0.986386	0.0425419	-2.31517	0.265349	0.928928	2.32717	1.45515		4	1.09107	0.103516
	2.81818	1.00545	-0.109885	-1.67766	0.198841	0.711408	1.69274	1.49207		4	1.03379	0.0452178
	1.75953	1.23372	-0.301202	-1.19553	-0.0146014	0.48753	1.51882	1.3212		4	1.00649	0.0287997
	1.73971	1.62745	0.175701	-1.80826	0.271609	0.547118	0.814558	1.42057		4	0.993384	0.0228903
	1.96938	1.10938	-0.353385	-1.84967	0.226648	0.55909	1.10832	1.35689		4	0.929109	0.00654285
	1.97991	0.739919	-0.0445759	-1.76792	0.641486	0.878033	2.15991	1.39131		4	1.04349	0.0526067
	2.65592	1.10306	-0.872016	-2.0789	0.0516948	0.745145	1.33882	1.61867		4	0.98731	0.0205189
	1.97397	0.678903	0.0461668	-2.31827	0.120725	0.536998	2.01177	1.36764		4	1.03001	0.042573
	1.64213	0.918922	0.227385	-1.89352	0.0979754	0.277576	2.13347	1.25019		4	1.06475	0.0721442
	2.67505	0.914395	-0.0111121	-1.96921	0.288576	0.844904	1.4492	1.34155		4	0.999969	0.025718
	1.70771	1.22448	-0.313367	-2.24913	0.394583	0.812244	1.57389	1.25398		4	0.991573	0.0221603
	2.14949	1.09665	0.04227	-1.75049	0.100746	0.573897	2.13002	1.24433		4	1.06466	0.0720509
	1.54991	1.11889	-0.389678	-1.40192	0.783612	0.852743	2.14048	1.32484		4	1.0566	0.0640831
	2.28175	1.17348	0.14428	-2.1811	0.0509578	0.53751	2.0635	0.425526		4	1.10973	0.131093
	2.14202	0.612006	0.0623086	-1.798	-0.11635	0.960847	1.55223	0.874797		4	1.00832	0.0297204
	1.98297	1.53106	-0.489822	-2.29061	0.253475	0.780839	1.54167	1.61037		4	1.01549	0.0335553
	1.9983	1.14521	-0.263903	-2.38697	0.229384	0.480601	1.95368	1.38102		4	1.03108	0.0433059
	3.06575	1.13415	0.289489	-2.13117	0.129075	0.493788	2.08327	1.03875		4	1.13035	0.167019
	2.00351	1.02175	-0.306958	-2.0237	0.222556	0.545328	1.70132	1.38922		4	0.982067	0.0186423
	1.34989	0.774335	-0.341445	-1.80498	0.627571	0.852924	1.46995	1.34952		4	0.95469	0.0110457
	2.43254	1.49994	-0.627581	-1.77563	0.593328	0.407162	1.67574	1.57378		4	1.02196	0.0373569
	1.96682	1.07965	-0.532388	-1.74648	-0.0260915	0.86256	1.33513	1.74567		4	0.965701	0.0136963
	1.34989	1.00459	-0.481799	-1.32512	0.341901	0.555464	2.41295	1.30161		4	1.08877	0.100429
	2.02756	1.19033	-0.087754	-2.43027	-0.210309	0.645933	2.15363	1.7739		4	1.08996	0.102017
	2.01392	1.19881	-0.883338	-1.76193	-0.178007	0.561931	2.31816	1.53166		4	1.08244	0.0922924
	2.13676	1.45672	-0.0835374	-1.19553	0.0299991	0.794313	1.71845	0.511577		4	1.09031	0.102491
	2.06118	1.0351	0.0663338	-1.19553	-0.240897	0.550872	1.5322	1.3305		4	1.02832	0.0414329
	1.99893	0.71857	-0.519535	-1.8125	-0.143804	0.548208	1.2925	1.35232		4	0.932111	0.00696971
	1.42688	0.749023	0.00635978	-1.8686	-0.0564835	0.494964	1.63252	1.8221		4	0.998436	0.025035
	2.46206	0.630738	-0.225813	-1.40344	0.0330288	0.688001	1.43365	1.55262		4	0.975206	0.0164093
	2.27059	0.537736	-0.298276	-1.82946	-0.285029	0.962159	2.44556	1.48268		4	1.09572	0.109959
	2.03389	0.967719	-0.0134389	-1.99618	-0.156457	0.744476	1.34451	1.52535		4	0.979878	0.0179033
	1.56428	1.14042	0.0651511	-1.94731	-0.117868	1.03483	2.27159	0.973663		4	1.11236	0.135345
	3.03658	1.02211	-0.470648	-2.33735	0.020845	0.589673	1.42662	1.4318		4	1.02609	0.0399644
	2.92956	0.553032	-0.23095	-1.84995	-0.0415102	-0.00630264	2.4676	0.399555		4	1.15897	0.226483
	2.45063	0.533642	0.0258577	-2.25432	-0.580327	0.457223	1.62564	1.35561		4	1.03187	0.0438581
	1.99963	1.14488	-0.627724	-1.94733	0.451442	0.740735	2.40726	1.8221		4	1.08208	0.0918369
	2.49482	1.13702	-0.654885	-2.09149	-0.17131	0.952665	1.09547	1.24964		4	0.980027	0.0179529
	2.63514	0.538367	-0.0192636	-2.43027	0.228493	0.693205	1.87582	1.24871		4	1.03562	0.0465394
	2.28751	0.989948	-0.637686	-1.65143	0.783325	0.930569	0.488846	1.76259		4	0.90966	0.00429587
	2.00443	1.05454	-0.451349	-1.79414	0.0163746	0.65634	1.38574	1.44124		4	0.956078	0.0113531
	1.69896	0.758016	-0.255163	-1.92743	-0.0914652	0.613134	1.72715	0.998729		4	0.993368	0.0228836
	1.8436	1.1377	-0.182	-1.8298	0.593911	0.0803154	1.29473	1.35638		4	0.951441	0.0103543
	1.75205	1.17249	-0.228212	-1.8384	0.385187	0.590697	1.71111	1.22758		4	0.994146	0.0232034
	2.95079	1.13135	-0.194864	-2.30757	0.0181145	0.789041	1.78941	0.42321		4	1.10548	0.124392
	2.41862	1.21798	0.299566	-2.05612	0.124451	0.843502	2.23983	1.66165		4	1.11681	0.142768
	2.14693	1.15266	-0.254803	-1.61038	-0.196578	0.712674	1.22857	1.02021		4	0.985469	0.0198424
	1.71062	1.09653	-0.165451	-1.688	0.435718	0.735053	1.6388	0.492862		4	1.02315	0.0380953
	2.98742	1.62745	-0.377449	-2.29229	0.349243	0.905823	1.26853	0.623237		3	1.24749	0.544836
	1.87599	0.53641	-0.278412	-1.83784	-0.163773	0.237169	1.69176	1.2316		4	0.97553	0.0165092
	2.51144	0.540614	0.039953	-1.52815	0.364583	0.778387	1.62368	1.32692		4	0.997408	0.0245855
	2.51607	1.61428	0.164401	-1.34605	-0.552176	0.234607	2.296	1.78103		4	1.18637	0.293167
	2.45818	0.985106	-0.176739	-1.634	-0.753476	0.592202	1.91597	0.483921		4	1.11803	0.144848
	1.52254	1.1724	0.117256	-1.19553	0.304917	0.709064	2.28746	1.33288		4	1.10694	0.126663
	2.08739	1.0261	0.0441257	-1.84422	0.462642	0.741561	2.16286	1.22256		4	1.05979	0.0671531
	3.22055	1.62745	-0.451255	-2.31723	0.18478	0.810905	1.09617	0.647798		3	1.23234	0.478756
	1.44557	1.19616	-0.522627	-2.13883	0.370466	0.370473	1.08349	1.67628		4	0.9373	0.00776567
	1.46444	0.774546	0.0828597	-1.20995	0.0424206	0.588406	1.5049	1.73285		4	1.00605	0.0285861
	1.63388	1.05755	-0.0809091	-1.84465	0.0198366	0.709845	1.63001	1.42932		4	0.997494	0.0246229
	2.12531	1.01632	-0.36111	-1.65557	0.290817	0.51198	1.30514	1.31813		4	0.941414	0.00845261
	1.3164	1.14866	0.0214798	-1.37859	-0.356592	0.328988	1.9312	1.59197		4	1.08025	0.0895888
	1.98577	0.624673	-0.203343	-1.27627	-0.0512574	0.46703	1.80087	1.53918		4	1.00517	0.0281511
	2.13634	1.17474	0.112394	-1.71161	0.717363	0.652678	1.62645	1.31091		4	1.00905	0.030092
	2.39041	0.58569	-0.357741	-1.32403	-0.0104382	0.0985351	1.54023	1.63315		4	0.984947	0.0196541
	2.02229	0.55327	-0.388577	-1.79479	0.0686841	0.30358	2.40318	1.24718		4	1.05893	0.0663171
	1.94921	1.1144	-0.354815	-1.78859	-0.0517972	0.843272	1.60875	1.59623		4	0.994734	0.0234479
	2.31907	1.16975	-0.523545	-2.15235	0.763342	0.696337	1.83185	1.67348		4	1.01707	0.0344544
	2.09687	1.16928	-0.240388	-2.35588	0.0851172	1.19285	1.42508	1.6035		4	1.00969	0.0304237
	1.9379	1.52618	0.105921	-2.38015	0.705809	0.744071	2.1973	1.66778		4	1.11098	0.133097
	1.96636	0.924399	-0.325056	-1.97439	-0.268282	0.757218	1.25292	1.40607		4	0.959394	0.012118
	1.78256	1.64872	-0.0818158	-1.30619	-0.115163	0.55	1.47595	1.73		4	1.05397	0.0616377
	1.8093	0.768295	-0.731167	-1.82748	-0.0408163	1.07785	1.75964	0.584453		4	1.02499	0.0392534
	2.6333	0.587818	0.0720829	-1.3471	0.292876	0.54734	1.43071	1.2977		4	0.994229	0.0232379
	1.973	1.34942	0.239622	-2.35603	-0.221127	0.379672	2.43158	1.79718		4	1.15028	0.207284
	2.19462	0.540751	-0.33059	-2.32003	-0.0677711	0.191084	1.79679	1.46612		4	0.991321	0.0220603
	2.03408	0.710126	-0.273454	-1.94972	-0.206366	0.513581	2.51793	1.30852		4	1.09286	0.10596
	2.96532	0.569135	0.216713	-1.38523	0.101378	0.620983	1.95188	1.48281		4	1.08489	0.0953811
	1.80319	0.82011	0.00283832	-2.11021	-0.254714	0.0803154	1.58367	1.40825		4	0.999766	0.0256266
	2.01152	1.14386	0.0863986	-2.08601	0.265598	0.55063	1.33987	1.38316		4	0.977318	0.0170708
	2.61246	0.548552	-0.155706	-2.04513	0.489567	0.633821	1.37481	1.03381		4	0.964719	0.0134397
	2.90642	1.40876	-0.0266289	-1.91299	0.230936	0.724818	1.75534	1.21395		4	1.07831	0.0872536
	1.51319	0.719878	-0.0860782	-2.35826	0.288324	0.533772	1.39972	0.435357		4	1.00303	0.0271271
	2.96223	0.868685	-0.205355	-1.84762	-0.0697547	0.397775	1.83342	1.58584		4	1.05431	0.0619465
	2.49582	1.14199	0.188248	-2.18199	0.303152	0.728455	1.93859	1.4362		4	1.06537	0.072789
	2.06834	1.33358	-0.513781	-1.42148	-0.0984696	0.945041	1.84169	1.28828		4	1.049	0.0572141
	2.08897	1.03986	-0.534362	-1.79382	0.248023	0.53562	1.54007	1.26812		4	0.960696	0.0124302
	2.4181	1.61701	-0.133616	-1.57862	0.396539	0.695761	1.52468	1.20968		4	1.03888	0.0489821
	1.92157	1.15649	-0.226408	-2.27482	0.206071	0.790944	0.987125	1.68294		4	0.948912	0.00984241
	2.47416	0.709418	-0.408712	-1.91901	0.783612	0.538711	1.84414	1.65773		4	0.998672	0.025139
	1.64644	0.583274	-0.4336	-2.39064	-0.0144284	0.0803154	1.90149	1.44921		4	1.00164	0.0264797
	1.98061	0.72611	-0.660948	-1.85216	-0.753722	0.855346	2.31926	1.36108		4	1.09989	0.115965
	2.57496	0.609604	-0.236847	-1.87619	0.0861634	0.5503	1.99862	1.48466		4	1.02689	0.0404865
	2.35925	1.45186	-0.259851	-2.02094	0.729803	0.958864	1.87264	1.28554		4	1.05574	0.0632773
	1.74102	0.538643	-0.945407	-1.34909	0.783612	0.0803154	1.81059	1.56064		4	0.986255	0.0201288
	1.34989	1.30471	-0.29902	-1.79272	0.435081	0.657679	1.58502	0.280428		4	1.05086	0.0588369
	2.00739	0.594035	-0.287711	-1.75319	-0.222352	0.276423	1.5397	1.21526		4	0.966439	0.0138921
	1.78971	1.00865	-0.945407	-1.37631	-0.577425	0.439793	1.99184	1.38999		4	1.0638	0.0711691
	2.02215	0.833485	0.00606713	-1.66742	0.0732667	0.723055	1.59194	0.710898		4	1.00851	0.029814
	2.16573	1.13457	0.0503441	-1.79328	0.370796	0.533245	1.87126	0.837688		4	1.04185	0.0512947
	1.60925	1.07315	-0.289426	-1.76167	-0.512517	0.892278	1.81969	1.34394		4	1.04912	0.0573186
	2.11447	0.816408	-0.0228625	-1.77142	0.283202	0.711745	1.38737	1.6734		4	0.959518	0.0121474
	2.06288	1.17521	0.201141	-1.57364	-0.0729917	0.514314	1.41662	1.49		4	1.01157	0.0314085
	2	0.533642	-0.190445	-1.72568	-0.396927	0.882632	1.7117	1.47791		4	1.00524	0.0281883
	2.72551	0.940408	0.109407	-2.22958	0.169801	0.306652	1.19224	1.25279		4	0.996065	0.0240083
	2.22215	1.25048	-0.275414	-1.959	-0.157818	0.706938	2.16476	1.27231		4	1.07779	0.086636
	1.70563	1.18076	-0.403676	-2.03371	-0.0966128	0.840995	2.31716	1.24511		4	1.08629	0.0971792
	1.99678	0.537201	-0.493023	-2.10325	-0.113068	0.936607	2.15245	1.32794		4	1.03539	0.0463706
	2.43875	1.47825	-0.0121089	-2.01941	0.154563	0.787168	1.08569	0.995203		4	1.01135	0.0312939
	2.62154	0.899181	0.314464	-2.1236	0.718819	0.555639	2.0479	1.60695		4	1.07832	0.0872635
	2.41042	1.119	0.084234	-1.71445	0.143346	0.893122	1.41504	1.65606		4	1.00927	0.0302058
	2.30682	1.18969	-0.202576	-1.22803	0.153706	0.707242	1.6895	1.52349		4	1.02803	0.0412345
	1.87425	1.15001	0.294062	-1.73272	-0.0629126	0.414293	1.67012	1.54509		4	1.03483	0.0459656
	2.90568	1.62745	-0.376817	-2.30308	0.246252	0.599083	0.516203	1.57544		3	1.1802	0.266265
	1.37239	1.06853	-0.102879	-1.76888	0.164743	0.494965	2.07065	0.235949		4	1.10161	0.118517
	2.01395	1.12933	-0.317035	-2.18567	0.338473	0.52222	1.73506	1.37712		4	0.993845	0.0230795
	2.21109	0.997567	-0.186745	-1.86171	0.19039	0.526477	1.53837	1.47828		4	0.973507	0.0158931
	2.77133	1.62745	-0.127089	-1.52141	-0.0389341	0.0581494	0.460645	0.250683		3	1.17424	0.245305
	2.00213	1.28768	-0.0427546	-2.25501	0.435005	0.598224	1.74619	1.43267		4	1.02153	0.037091
	2.04112	0.550757	-0.407887	-1.76967	0.118061	0.795947	1.51588	1.57261		4	0.945295	0.00914884
	2.29412	1.10651	-0.153743	-1.78766	0.442718	1.09055	2.44522	1.25376		4	1.11033	0.132049
	2.45293	1.39492	0.239178	-1.71623	0.300376	0.99138	2.19319	1.25545		4	1.12066	0.149403
	2.05202	1.12493	0.159722	-2.14375	-0.320804	0.563154	1.62601	1.4088		4	1.03596	0.0467882
	2.13125	1.22765	0.288327	-1.83785	0.00808998	0.789689	2.02759	1.60364		4	1.08315	0.0931779
	2.23286	1.1774	-0.0824052	-1.33761	0.595831	0.915129	2.433	1.69904		4	1.11873	0.146056
	2.27908	0.559029	-0.317221	-1.29442	-0.16911	0.753482	2.26188	1.40896		4	1.07258	0.0806007
	2.47108	1.15917	-0.149747	-1.746	0.105543	0.491709	1.69853	1.43052		4	1.01817	0.0350898
	2.57899	1.27261	-0.325614	-1.59841	0.244449	0.917249	2.29385	1.35999		4	1.10357	0.121466
	1.51286	0.968327	-0.343624	-2.13634	0.0506553	1.19285	2.35318	1.62813		4	1.09512	0.109111
	1.77278	1.09271	0.0544897	-2.08764	-0.448754	0.584557	2.51793	0.913315		4	1.14711	0.20052
	1.66494	0.804875	0.0698935	-1.86862	0.166446	0.493683	2.07503	1.04538		4	1.04311	0.0523004
	1.69231	1.26292	-0.111163	-1.69996	0.502157	0.703589	1.24185	1.56023		4	0.962322	0.01283
	2.88254	1.05437	0.262615	-1.92422	0.372302	0.752931	2.40368	1.53799		4	1.14177	0.189439
	2.02784	1.39482	0.31394	-1.3694	-0.0934928	0.782747	2.51793	1.57579		4	1.16747	0.246215
	1.80528	1.10185	-0.308232	-1.52553	0.244762	0.091505	2.20912	1.47652		4	1.0588	0.0661865
	3.10422	1.04037	-0.212218	-2.12191	0.187718	0.485178	1.22706	1.36391		4	1.01528	0.0334387
	2.10019	0.827102	0.0839656	-2.23771	0.281316	0.403491	1.38616	0.768333		4	0.985972	0.0200255
	2.357	0.560444	-0.54716	-1.57965	0.206179	0.459113	2.12926	1.58974		4	1.02499	0.0392528
	1.89384	1.12193	0.00297342	-1.48055	0.161513	0.850354	1.57334	0.704338		4	1.02658	0.0402804
	1.75739	0.894637	-0.0308356	-2.26342	0.114085	0.630445	2.26206	1.63321		4	1.06801	0.0755783
	2.43846	1.09402	-0.162939	-1.76319	0.378586	0.687086	1.25771	1.31811		4	0.964962	0.0135027
	2.1102	0.673452	-0.311331	-2.32433	-0.024806	0.549899	2.40302	1.24703		4	1.07441	0.0826788
	1.88997	1.29845	-0.136441	-1.76629	-0.165203	0.925899	1.49301	1.30258		4	1.01608	0.0338885
	1.52449	0.662227	-0.101886	-1.73092	0.312492	0.40615	0.850358	1.39911		4	0.901112	0.00354853
	1.698	1.14662	-0.417022	-2.16545	0.178304	0.0803154	1.70376	1.2837		4	0.996207	0.0240688
	2.44076	0.628737	-0.557213	-2.35093	0.0817629	0.769921	2.43001	1.38756		4	1.08233	0.0921594
	2.09363	1.08859	-0.387859	-1.59479	0.0531805	0.657862	2.3692	1.38298		4	1.0814	0.091006
	1.92806	1.13912	0.31394	-2.28204	-0.753722	0.685744	2.42722	1.47351		4	1.1698	0.25177
	1.62564	1.12111	0.0955463	-1.78336	0.185741	1.19285	1.55138	1.77966		4	1.02709	0.0406143
	2.24517	1.11881	-0.840583	-1.86525	0.0202272	0.686495	2.01474	1.34682		4	1.03433	0.0455997
	1.64739	1.4151	-0.110492	-1.99315	0.400544	0.652587	1.93322	1.8221		4	1.05251	0.0603099
	2.07967	0.847769	-0.313573	-2.22096	-0.00733329	0.680053	1.50913	1.39165		4	0.966306	0.0138568
	1.72232	1.12426	-0.105108	-1.30806	-0.258326	0.278856	2.29506	1.27451		4	1.10405	0.122199
	2.18872	1.15528	-0.0519327	-2.04334	0.211858	0.851026	1.52949	1.28241		4	0.999087	0.0253232
	2.00068	1.16793	-0.444792	-1.86416	-0.144623	0.489516	2.13559	1.54769		4	1.05458	0.0621965
	1.77193	1.12586	0.134584	-1.62689	-0.308989	0.519586	1.50526	1.37424		4	1.02147	0.0370569
	1.70924	1.62745	-0.104217	-2.26634	0.0467032	0.631164	2.51793	1.46948		4	1.1501	0.206884
	1.69549	0.533642	-0.434685	-1.94149	0.311663	0.532078	2.20217	0.622205		4	1.04788	0.0562548
	2.65697	0.541023	0.31394	-1.19553	-0.177827	0.547968	2.28158	1.67855		4	1.12872	0.163976
	2.32523	1.05161	0.217132	-1.35539	-0.183575	0.749156	1.58197	1.51035		4	1.04392	0.0529578
	1.53803	0.789764	-0.113752	-2.41956	-0.341094	0.917173	0.641849	0.347867		4	1.01501	0.0332872
	2.77905	1.10487	-0.274681	-1.79309	0.275188	0.863476	1.68324	0.691833		4	1.05004	0.058115
	1.8786	0.58679	0.307122	-2.38851	0.750319	0.483087	2.51793	0.990026		4	1.12036	0.148891
	2.81303	1.09592	0.110439	-1.7124	0.0884073	0.435891	1.66214	1.38123		4	1.0484	0.0566972
	2.89308	1.42169	-0.998796	-1.89969	-0.157945	0.53837	1.42166	1.09177		4	1.04874	0.0569937
	2.00936	0.600001	-0.321711	-1.93008	-0.159276	0.888628	2.24556	0.959765		4	1.06273	0.070076
	1.8386	1.05992	-0.394827	-1.97149	0.483854	0.52977	1.4925	1.8221		4	0.959964	0.0122538
	1.85032	0.739525	-0.210562	-2.4085	-0.375809	0.542913	0.460645	1.40818		4	0.940017	0.00821353
	1.93177	0.68746	0.0555856	-1.77065	-0.339795	0.639276	2.17061	1.52533		4	1.06699	0.0744972
	1.89977	1.11213	-0.813287	-1.61206	-0.184409	0.670675	2.32503	1.174		4	1.08276	0.0926903
	2.54471	1.46506	-0.230773	-1.80472	0.101235	0.427217	1.97536	1.4602		4	1.07313	0.0812242
	1.95972	1.14728	-0.00663139	-1.78283	0.21143	0.85774	2.07889	1.53213		4	1.0575	0.0649354
	2.54108	0.533642	-1.01756	-1.24161	-0.103669	0.53056	2.03155	1.07331		4	1.05235	0.0601644
	1.78102	1.10299	0.0662076	-1.99204	0.299941	0.852292	1.87526	1.32551		4	1.03172	0.0437508
	2.01644	1.12852	-0.422633	-2.34359	0.0776782	0.846752	1.07816	1.30947		4	0.952815	0.0106418
	2.02157	0.836844	-0.200582	-1.82266	-0.283835	0.0803154	2.10967	1.49643		4	1.05154	0.0594409
	2.22933	0.533642	-0.315943	-1.99077	-0.232464	0.73647	2.21477	1.31569		4	1.05148	0.0593934
	2.14598	1.17502	-0.152573	-1.98942	0.211724	0.555611	2.20225	1.40184		4	1.06417	0.0715507
	1.66307	1.12966	0.294751	-2.43027	0.0782563	0.34797	1.25804	1.3245		4	1.00443	0.0277957
	1.96447	0.934487	-0.527701	-1.77682	0.706337	0.560683	2.40144	1.8221		4	1.06927	0.076941
	2.23357	1.11334	0.0090026	-1.65702	0.783612	0.471097	1.60683	1.41442		4	0.998196	0.0249292
	1.67222	1.11776	-0.0866168	-2.42348	0.379442	0.705677	1.53616	1.47543		4	0.993583	0.022972
	1.90425	0.617181	-0.15891	-2.34379	-0.0915084	0.750956	2.46644	1.17416		4	1.09305	0.106217
	2.78224	0.751549	-0.945407	-2.22403	0.311568	0.780096	0.961862	1.6159		4	0.94763	0.00959143
	2.44276	1.11606	-0.133701	-2.30153	0.209911	0.804695	1.88942	1.26826		4	1.04466	0.0535597
	2.58952	0.594995	-0.030102	-1.86269	0.07079	0.536391	1.57973	1.39832		4	0.990797	0.0218536
	1.39584	1.62745	-0.080207	-1.80786	0.328504	0.803433	0.986272	0.707604		4	1.0166	0.0341845
	1.36199	1.19362	0.31394	-1.81736	0.20093	0.72327	2.51793	1.28219		4	1.14246	0.19084
	2.02135	1.4693	-0.316487	-1.79318	0.446656	0.113299	2.22767	1.27996		4	1.08196	0.0916953
	1.72315	1.28049	-0.548192	-1.38331	-0.753722	0.797902	2.20166	0.408337		4	1.15973	0.228202
	2.16237	1.02018	-0.364911	-2.43027	0.196458	0.178216	2.50249	1.34129		4	1.10178	0.118773
	2.65119	0.880378	-0.15001	-1.63427	-0.0769495	0.308439	2.0833	1.42572		4	1.06562	0.0730542
	2.75786	0.533642	-0.381575	-1.72852	0.297723	0.60284	0.867283	1.8221		4	0.934696	0.00735678
	2.95078	1.15054	-0.171192	-2.07605	-0.0859364	0.842393	1.71352	0.607996		4	1.08932	0.101161
	2.02113	0.893137	-0.0421102	-1.80266	-0.43042	0.476675	1.32901	0.235949		4	1.04817	0.0565009
	2.06564	0.663356	-0.381994	-1.74756	-0.174361	1.12006	1.90378	1.26414		4	1.02404	0.0386521
	2.33178	1.12928	-0.505125	-1.55743	-0.161844	0.548562	1.6638	0.833415		4	1.02527	0.0394369
	2.6213	0.633526	-0.613227	-2.0901	0.180768	1.01719	2.03042	1.4121		4	1.03717	0.0476929
	1.72433	0.575514	-0.726627	-2.22503	-0.169486	0.481682	2.29868	1.2779		4	1.04912	0.0573186
	2.51183	1.15548	-0.150372	-1.87796	0.236015	0.880994	2.16656	1.73293		4	1.08152	0.0911511
	1.81866	1.16044	-0.2205	-1.95435	-0.323103	0.800702	1.54354	1.40065		4	1.00978	0.0304699
	1.72612	1.30684	0.21167	-2.43027	-0.263947	0.152131	1.84431	1.36376		4	1.08022	0.0895588
	2.66703	0.567418	-0.431588	-2.2328	0.0113388	0.479131	0.914513	1.69879		4	0.936521	0.00764127
	2.08169	0.789398	0.0514409	-1.99622	0.175273	0.827181	2.10648	1.33148		4	1.04682	0.0553576
	1.34989	1.19858	-0.303668	-1.24483	0.348234	0.49671	2.14834	1.50148		4	1.07048	0.0782657
	3.06286	1.29931	-0.931306	-1.82062	0.0176239	1.08588	0.823131	0.893275		4	1.03071	0.043051
	2.93919	0.574484	0.0480794	-2.33687	-0.147972	0.764053	1.77771	0.69826		4	1.08147	0.0910914
	2.44569	0.948829	-0.503613	-1.55666	0.197171	0.734074	2.50185	0.948427		4	1.10827	0.128767
	2.11623	1.08201	-0.945407	-1.67006	-0.0130492	0.633558	1.43596	1.22396		4	0.969498	0.0147298
	2.03137	1.05261	-0.000794138	-1.79746	-0.0891108	0.391907	2.44238	1.58137		4	1.1043	0.122584
	1.6117	0.612695	0.0700926	-1.79921	-0.22555	0.836544	1.35166	1.4276		4	0.977588	0.017157
	2.8108	1.50946	0.00523733	-1.90543	0.408908	0.534433	1.42912	1.77314		4	1.05034	0.0583804
	2.57022	1.39067	-0.416012	-1.89654	-0.308237	0.52502	2.33381	1.54548		4	1.12428	0.155831
	2.26571	1.14019	-0.217419	-2.35897	0.209048	0.221242	2.20151	0.457632		4	1.10576	0.124837
	1.927	1.62745	-0.395987	-1.84136	0.274236	0.823989	2.03062	1.78352		4	1.07692	0.0856068
	1.99644	0.900051	-0.184718	-2.31486	0.194766	0.663156	2.34138	1.74227		4	1.07482	0.0831588
	2.03012	1.07435	-0.316624	-1.71861	0.148786	0.722196	1.3362	0.890003		4	0.968223	0.0143756
	2.12784	1.1011	0.0567571	-2.3881	0.303639	0.811031	1.26385	0.578382		4	1.01365	0.0325343
	1.68208	0.597986	-0.389358	-1.77582	-0.225588	0.610607	1.45627	1.33975		4	0.952489	0.0105731
	2.456	1.11013	-0.288989	-1.98601	-0.0754397	0.613412	1.95177	1.1412		4	1.0475	0.0559314
	2.30404	1.0411	-0.138604	-1.79894	0.151659	0.783498	2.40064	1.3138		4	1.0942	0.107814
	2.30268	1.14251	-0.536229	-1.42487	0.0307169	0.571914	1.89745	1.5244		4	1.03134	0.0434847
	1.98682	1.10286	-0.267468	-1.74588	0.310716	0.769635	1.37201	1.43412		4	0.957347	0.0116408
	2.70555	0.941305	-0.784693	-1.83498	-0.209733	0.698726	2.25854	0.821692		4	1.10099	0.117602
	1.97094	1.33826	-0.234026	-2.38595	-0.0775033	0.916066	1.36462	1.33345		4	1.00938	0.0302601
	1.81431	1.15927	0.135328	-1.9217	0.386432	0.498857	1.58389	0.741544		4	1.01828	0.0351548
	1.77137	1.62745	0.0105478	-1.80436	0.4136	0.77303	2.05557	1.57818		4	1.08786	0.099223
	2.71832	1.12077	-0.222525	-2.18785	-0.0344087	0.379302	1.26456	1.61068		4	0.999474	0.0254959
	1.98775	0.750077	-0.125892	-2.37262	0.423158	0.561906	1.43861	1.49665		4	0.954508	0.0110059
	2.12051	0.592137	0.0326923	-1.81612	-0.298838	0.759423	2.39884	1.34269		4	1.09601	0.110369
	2.48806	1.58653	-0.291509	-1.36509	-0.079285	0.470141	2.40782	1.51503		4	1.14723	0.200763
	1.56576	1.11128	-0.408728	-1.92514	0.177716	0.70249	1.33677	1.84338		4	0.962024	0.0127559
	1.61027	1.12665	0.263132	-1.48164	0.0396086	0.873584	1.57739	0.625646		4	1.05712	0.0645757
	1.98353	0.781937	-0.277733	-2.27691	0.0535212	1.04032	1.57318	1.54966		4	0.983835	0.0192581
	2.00645	0.839675	0.262383	-1.77467	-0.285749	0.875197	1.52014	1.57242		4	1.02141	0.037019
	2.6099	1.34123	-0.0742537	-1.58674	0.081129	0.835207	1.44875	0.93919		4	1.03942	0.0493987
	2.35695	1.11724	0.267009	-2.13456	0.783612	0.800766	2.29605	1.31483		4	1.1087	0.129434
	2.90951	1.45724	0.0389662	-2.04043	0.33882	0.728687	2.09828	1.53315		4	1.12003	0.148314
	1.71723	0.94216	-0.235535	-2.05922	0.213498	0.729263	1.69584	1.0136		4	0.99118	0.0220045
	1.98072	1.20465	-0.945407	-1.67772	0.415603	0.814399	2.06694	1.65369		4	1.0407	0.0503891
	2.25552	1.19208	-0.303916	-2.30088	0.10459	0.578389	1.60143	1.05535		4	1.0073	0.0292059
	1.80882	1.371	-0.252243	-2.31815	0.00169795	0.703103	1.50267	1.48552		4	1.00868	0.0299018
	2.25158	0.539695	0.0470586	-2.15327	0.679859	0.912361	2.33624	1.54558		4	1.07759	0.0863994
	2.16686	0.824729	0.24443	-1.89386	0.264023	0.785157	0.832574	1.22264		4	0.946217	0.00932141
	2.18628	1.56838	-0.0486736	-1.87768	0.165634	0.802157	1.48296	1.43871		4	1.02926	0.0420631
	3.0306	1.58996	-0.214325	-1.80979	0.258915	0.669162	2.3688	1.75733		4	1.16377	0.237512
	1.70203	0.823601	0.121954	-1.96159	-0.248453	0.93908	1.4202	1.80237		4	1.0056	0.0283643
	1.59804	1.00966	-0.224094	-2.10138	0.705233	0.469133	2.33206	0.524791		4	1.09655	0.111129
	2.10818	0.537995	-0.116354	-2.37234	-0.15815	0.743273	1.07877	1.28635		4	0.945688	0.009222
	1.8802	1.12848	-0.368623	-1.38984	-0.0915424	0.550184	2.3773	1.71753		4	1.09612	0.110526
	2.07177	0.997303	-0.49406	-2.36181	0.0691344	0.538246	2.03836	1.18478		4	1.03302	0.0446627
	2.3982	0.80552	-0.114071	-1.38674	0.0601447	0.48647	1.08651	0.501989		4	0.992019	0.0223382
	2.23052	0.752489	-0.592232	-2.01834	0.0462641	0.384011	1.60086	1.37186		4	0.958568	0.0119235
	2.14402	0.539861	-0.210522	-2.26552	-0.268864	0.517018	1.98325	1.21473		4	1.02706	0.0405946
	2.8332	0.573149	0.218506	-1.75818	-0.254201	0.517354	2.08476	1.5888		4	1.09482	0.108682
	2.51772	0.745787	-0.539111	-1.69507	0.472152	0.730376	1.55198	1.40154		4	0.964877	0.0134806
	2.22298	1.13842	-0.700266	-1.56571	-0.0601702	0.624171	2.03345	1.44919		4	1.04308	0.0522727
	1.93824	1.14097	-0.302363	-1.78916	-0.296721	0.604903	1.84694	1.36589		4	1.03081	0.0431165
	1.92198	1.60244	-0.252017	-1.9192	0.127244	0.790642	2.15014	1.43652		4	1.09087	0.103246
	1.93835	1.14988	0.195464	-2.02044	0.53406	0.535974	2.18091	1.58953		4	1.07383	0.0820193
	2.25364	1.07703	-0.0571355	-1.96462	0.66074	0.744382	2.37024	1.2497		4	1.08991	0.101953
	2.76907	0.815854	-0.0884361	-1.93222	0.076929	0.128384	1.08692	1.30245		4	0.974871	0.0163063
	1.62802	0.545913	-0.497457	-1.83445	0.0885906	0.601138	1.42325	1.59258		4	0.928309	0.00643314
	1.93392	0.894539	-0.207877	-1.78209	-0.0287948	0.849736	0.460645	1.49705		4	0.916855	0.00503074
	2.65939	1.01885	0.193985	-1.19553	0.783612	0.645509	2.00268	1.50628		4	1.0879	0.0992819
	2.64345	0.907487	-0.11984	-1.6464	-0.320301	0.755708	2.51793	1.59544		4	1.13922	0.184272
	1.98439	0.607169	-0.255762	-2.23147	-0.0839513	0.820077	1.49293	1.58349		4	0.963103	0.0130259
	1.40752	0.609793	-0.275865	-1.69743	0.00121546	0.809665	1.75633	1.27701		4	0.99322	0.0228236
	1.90686	0.545519	0.31394	-1.85838	0.412452	0.775852	1.60721	1.24641		4	0.993533	0.0229513
	2.57916	1.16511	-0.0546504	-2.35356	-0.108156	0.632667	2.18203	1.33253		4	1.10055	0.116941
	3.22055	1.05182	-0.343007	-1.68351	0.162369	0.870642	2.14704	1.76173		4	1.1211	0.150176
	2.37955	1.11963	-0.228781	-1.42713	-0.131543	1.19285	1.02352	1.32428		4	0.996434	0.0241657
	1.59359	0.896786	-0.11549	-2.26192	0.627226	0.148997	2.02305	1.43394		4	1.0289	0.0418219
	2.88775	1.11771	0.0800269	-1.90258	0.299482	0.594354	1.42408	1.37333		4	1.02643	0.0401849
	2.64046	0.862381	-0.311375	-1.64918	-0.0702892	0.822292	2.12879	1.25285		4	1.06915	0.0768058
	2.93865	0.954011	-0.00757051	-2.22112	0.553238	0.961001	1.98262	1.49764		4	1.08282	0.0927614
	1.69423	0.537997	0.219248	-1.86866	-0.191474	0.146506	2.25729	1.53916		4	1.07866	0.0876666
	1.96447	1.16993	0.174414	-2.05819	-0.27899	1.03859	2.32592	1.33854		4	1.12644	0.159755
	2.10118	1.06739	-0.15883	-2.23151	0.316552	0.73376	1.00428	1.27344		4	0.939849	0.00818528
	3.12758	0.540331	-0.332953	-1.91442	0.0344343	0.45465	2.06277	1.68234		4	1.07697	0.0856623
	2.18213	0.91936	0.0556163	-2.35316	-0.753722	0.529557	2.04433	1.09838		4	1.10486	0.123436
	2.00415	1.24148	-0.179399	-2.14787	0.376376	0.550991	2.21736	1.25765		4	1.06756	0.0751021
	3.22055	0.533484	-0.0812435	-1.86016	0.0663738	0.126062	1.71715	1.41752		4	1.05953	0.0668995
	2.75364	1.01134	-0.558325	-2.10482	0.446782	0.45219	1.08009	1.07598		4	0.958466	0.0118997
	3.22055	1.06763	-0.43227	-1.87868	0.0669054	0.621463	1.42739	1.2865		4	1.04047	0.050209
	1.92881	1.0424	-0.359734	-2.03076	-0.198012	1.14029	1.56675	1.43741		4	1.00704	0.0290726
	1.34989	1.16385	0.31394	-1.60182	0.783612	1.19285	2.43833	1.65494		4	1.14873	0.203952
	1.83208	0.539473	-0.637509	-1.92788	0.344902	0.691491	1.67853	1.44988		4	0.94656	0.00938639
	2.18874	1.20046	-0.38345	-1.66877	-0.0574301	0.694254	1.76126	1.36473		4	1.01794	0.0349542
	2.70956	1.17172	-0.386332	-2.2621	0.334517	0.763043	1.69421	1.38841		4	1.02791	0.0411601
	2.35291	1.14764	0.0246497	-2.04833	0.0114837	1.18901	1.03143	1.25512		4	0.996892	0.0243623
	1.92686	0.601467	-0.581927	-1.82136	0.783884	0.945002	1.77251	1.67582		4	0.976902	0.0169388
	2.39426	0.572879	-0.742622	-2.30699	0.42489	0.286989	2.22167	1.32158		4	1.03843	0.048637
	1.30694	0.86599	-0.348206	-1.84676	0.0867294	0.846251	1.36749	1.33086		4	0.961234	0.0125612
	2.96658	0.953419	0.263788	-1.90332	0.116601	0.435159	1.5655	1.40192		4	1.05247	0.0602757
	1.63836	1.14526	0.215457	-2.31099	0.667067	0.367728	2.51793	1.3773		4	1.12646	0.159803
	3.02813	1.23826	-0.0748531	-1.63568	0.0531478	0.921551	1.69773	1.59559		4	1.08024	0.0895738
	2.04596	1.158	-0.050511	-2.37564	0.782986	0.949555	1.88457	1.25914		4	1.04483	0.053703
	1.60653	1.11861	-0.156139	-1.8797	-0.414946	0.40926	2.15014	1.58332		4	1.07922	0.0883422
	1.91389	1.00039	-0.427816	-1.78233	-0.00252339	0.800831	1.9924	1.38898		4	1.02419	0.0387461
	2.59389	1.01582	-0.00249539	-1.43801	0.35	0.599268	1.54798	1.4423		4	1.01097	0.0310924
	2.74381	1.08032	-0.462419	-2.11279	0.250507	0.728629	0.676018	1.19335		4	0.94978	0.0100155
	1.74586	1.13641	0.0403212	-1.31833	-0.163518	0.0803154	1.54559	0.993722		4	1.03365	0.0451174
	1.87987	0.598492	-0.937782	-1.85354	0.0064895	0.913966	1.65397	1.18398		4	0.96882	0.0145406
	2.66503	1.53595	-0.33294	-1.19553	0.166874	0.855524	1.51458	1.58756		4	1.06011	0.0674614
	2.69567	1.10275	0.194981	-1.85668	0.293238	0.53551	1.37947	1.12665		4	1.01779	0.0348706
	2.67497	0.5401	-0.379407	-1.34755	0.226259	0.799062	1.80721	0.304017		4	1.06687	0.0743656
	1.73605	0.981415	0.0220778	-2.41051	0.28358	0.57351	1.94866	1.47731		4	1.0344	0.0456533
	1.88723	1.10698	-0.183014	-2.23624	-0.529021	0.449596	2.20249	0.903168		4	1.10374	0.121724
	2.07632	1.1228	-0.336348	-2.33115	-0.0321884	0.848954	2.06626	1.63351		4	1.05665	0.0641339
	1.65843	1.1486	-0.144471	-2.23813	0.16107	0.532587	1.83305	1.54239		4	1.01965	0.0359581
	2.00818	1.13037	-0.377898	-1.57093	0.0146273	0.376112	1.60408	1.31285		4	0.988124	0.0208241
	2.19366	1.16982	-0.0307886	-1.77372	-0.715727	0.610817	0.675696	1.29972		4	1.00927	0.0302053
	1.70134	1.08488	-0.287188	-1.68124	-0.0600204	0.767084	1.63527	1.20228		4	0.998478	0.0250537
	2.15119	0.697363	-0.354066	-1.77871	-0.303673	0.60811	1.40538	1.6015		4	0.962197	0.0127989
	2.72783	1.18106	-0.330073	-2.23789	-0.283159	0.548194	1.58756	1.32157		4	1.04079	0.0504583
	2.9577	1.07674	0.159371	-1.61832	0.0395503	0.758342	2.19065	1.67817		4	1.12681	0.160446
	1.73756	1.12611	-0.135016	-2.28076	0.321972	0.546765	1.66643	1.60917		4	0.997607	0.0246719
	2.38464	0.667037	0.0459359	-1.64204	0.316541	0.929103	0.767538	1.57205		4	0.935064	0.00741332
	2.14944	1.2856	0.31394	-1.58751	1.00827	0.237568	1.57936	1.36599		4	1.03604	0.046851
	1.82868	0.588117	-0.191517	-1.6553	-0.212147	1.05261	1.13291	1.47108		4	0.95317	0.0107173
	2.31472	1.23175	-0.236335	-1.76076	0.262004	0.835035	1.63895	1.8221		4	1.01514	0.0333569
	1.79593	0.537851	0.15344	-1.86216	0.184076	0.392534	1.37056	0.235949		4	1.01806	0.0350226
	2.39187	1.24798	-0.26746	-1.27563	0.137922	0.174571	1.69658	1.24107		4	1.03314	0.0447531
	1.71384	0.732306	0.0165621	-2.0377	0.395147	0.681223	1.34985	1.28027		4	0.947601	0.00958593
	2.05186	1.12316	-0.0276352	-2.26529	-0.52439	0.760132	1.56966	1.25582		4	1.04131	0.0508646
	2.66387	0.538153	0.140448	-1.89084	0.33899	0.786544	2.25548	1.42078		4	1.08319	0.093226
	2.21334	0.921688	-0.232211	-2.14393	0.113078	0.693521	1.97497	0.908653		4	1.03585	0.046708
	1.83739	1.15922	0.31394	-1.79149	-0.000396836	0.500609	2.51793	1.63803		4	1.13641	0.178687
	2.5954	1.4826	-0.314703	-1.94275	0.764323	0.547609	2.40418	1.32303		4	1.12359	0.154592
	1.97604	1.1728	-0.702384	-1.83009	0.782989	0.895664	1.19263	0.664106		4	0.965511	0.0136463
	1.68102	0.883367	-0.237132	-1.77651	0.0694147	0.8977	1.52958	1.76686		4	0.977973	0.0172806
	2.50687	0.968353	0.00118602	-1.76456	0.152362	0.609074	2.43637	1.25516		4	1.10769	0.127846
	2.87844	1.33795	-0.00279306	-1.85318	-0.753722	0.504631	1.93566	0.451018		4	1.1689	0.249612
	2.9091	0.705294	-0.292372	-1.95889	0.0994593	0.765821	1.1264	1.19604		4	0.974377	0.0161557
	1.95633	1.27723	0.183849	-2.05681	0.115843	0.572768	1.85249	1.3587		4	1.0486	0.0568723
	2.37116	1.06773	-0.0502333	-2.23509	-0.0874854	0.666119	1.22398	1.50711		4	0.985001	0.0196735
	2.3941	1.50733	-0.515629	-1.85264	0.421838	0.740371	2.40291	1.0283		4	1.11861	0.145841
	1.99525	1.0471	0.0617127	-2.23693	-0.25054	0.350552	2.22905	1.25693		4	1.0897	0.101661
	2.00481	1.07823	-0.356839	-1.77099	0.147301	0.541354	2.22536	1.40699		4	1.05274	0.0605171
	2.11735	1.2873	-0.505094	-1.7493	-0.577521	0.713492	0.747485	1.61837		4	0.988917	0.0211249
	2.87663	0.66893	-0.445007	-1.99081	0.25634	0.18446	2.41538	1.31374		4	1.09786	0.113014
	1.77902	0.901039	0.0356844	-2.43027	0.186606	0.764382	1.97464	1.32438		4	1.04095	0.050587
	2.00794	0.592988	0.064632	-1.73195	0.0742347	0.0803154	1.00758	1.25245		4	0.935241	0.00744074
	2.10678	1.15301	-0.921032	-1.19553	0.287061	0.654699	1.56611	1.66684		4	0.996263	0.0240927
	2.26863	1.13695	-0.31824	-1.76738	0.00812133	0.551076	2.2492	1.16914		4	1.07409	0.0823207
	2.0085	1.13114	-0.746048	-2.19531	-0.0483399	0.93792	1.49406	1.22999		4	0.987559	0.020612
	2.9506	1.1232	-0.309798	-1.54058	0.278986	0.545636	1.2349	1.52719		4	1.00355	0.0273734
	3.06263	0.602851	-0.336124	-1.55205	0.783612	0.861717	1.1832	1.42273		4	0.988359	0.020913
	2.57419	1.61184	0.00209714	-1.95006	-0.211194	0.240111	1.53478	1.58402		4	1.07147	0.0793549
	2.58981	0.554938	-0.248906	-2.29568	0.291843	0.967034	2.05716	1.42092		4	1.04556	0.0542999
	1.66136	1.15722	0.0871283	-1.77507	0.390868	0.636343	1.07552	1.49968		4	0.954277	0.0109557
	1.77675	0.53922	-0.403727	-2.23881	0.306293	0.488628	1.79071	1.36031		4	0.968022	0.0143204
	2.21394	1.53724	-0.416279	-1.97553	-0.248217	0.0803154	1.30517	1.49752		4	1.01814	0.0350741
	2.00292	1.1329	-0.257698	-2.1392	-0.811391	0.684124	1.82455	1.8221		4	1.07893	0.0879965
	3.08575	1.4559	-0.00480496	-2.2848	0.313441	0.583935	1.96347	1.41228		4	1.11902	0.14655
	2.13875	1.12924	-0.144703	-2.18515	-0.339199	0.703674	1.83686	1.36143		4	1.04554	0.0542876
	1.44447	1.59216	-0.0992607	-1.83402	0.413822	0.0816719	1.92956	1.64924		4	1.07009	0.0778318
	1.86526	0.634856	-0.0862051	-1.88879	0.664644	0.588713	1.77904	1.52828		4	0.979872	0.0179013
	1.67861	0.723095	0.0420166	-1.5991	0.508273	0.557619	1.20816	1.26462		4	0.935276	0.00744607
	2.05965	0.536599	-0.414095	-2.17574	-0.0830642	1.03061	1.94977	1.74668		4	1.01906	0.0356093
	2.84121	1.59396	-0.337613	-1.95886	0.555682	0.778292	2.1185	1.45401		4	1.11294	0.136296
	1.70296	1.59963	-0.206986	-1.81686	-0.106465	0.467652	1.86165	0.497601		4	1.09538	0.109479
	2.89158	1.30656	0.0122373	-1.73318	-0.320782	0.632136	0.460645	1.66329		3	1.18427	0.281091
	3.0854	1.17333	0.177868	-1.54001	0.189977	1.1436	0.460645	1.20249		3	1.14997	0.16976
	1.8354	0.587381	-0.288218	-1.82745	-0.0873686	0.943976	1.31948	1.4114		4	0.945169	0.00912547
	1.76476	1.10421	-0.308815	-1.93983	-0.0584141	0.799624	2.42264	1.33492		4	1.09383	0.107302
	2.18108	1.0009	-0.408856	-1.77387	0.131228	0.851803	1.57449	1.34345		4	0.978038	0.0173017
	2.25366	1.13984	-0.303458	-1.83791	-0.104952	0.273535	1.37425	0.59902		4	1.00942	0.0302835
	2.32932	0.760105	-0.578916	-2.05636	0.139625	0.484026	1.52658	1.05638		4	0.960029	0.0122693
	1.99047	1.55112	-0.360435	-1.40077	0.165946	0.611758	1.39274	1.4932		4	1.00646	0.0287863
	1.54477	0.712614	-0.538269	-1.89702	0.0979779	0.79378	1.54671	1.27083		4	0.954369	0.0109758
	2.96651	1.20392	-0.201875	-1.79055	0.158741	0.406236	2.10861	1.44443		4	1.09661	0.111222
	2.75179	1.15968	0.115631	-1.97576	0.125825	0.549817	2.06854	1.48586		4	1.09001	0.102083
	2.08094	0.853374	0.0869811	-1.73775	0.0288901	0.713096	1.42168	1.57942		4	0.978813	0.0175528
	2.49413	1.47039	-0.190705	-1.74195	0.785494	0.994168	1.41143	1.21606		4	1.02264	0.0377779
	1.98097	0.935321	0.04153	-2.08851	-0.0115996	0.853059	2.51793	1.25592		4	1.1153	0.140226
	2.14216	1.11345	-0.267921	-2.403	0.325511	0.32991	1.95052	1.54031		4	1.03062	0.0429892
	2.10646	1.22327	-0.945407	-1.76318	-0.120194	0.616392	1.95425	1.47116		4	1.03751	0.0479428
	1.74983	1.31709	-0.341901	-1.90994	-0.0779547	0.475961	1.21175	1.65119		4	0.971214	0.0152184
	1.82103	0.568351	-0.341684	-1.31492	0.303694	0.554127	1.56565	1.375		4	0.955836	0.011299
	2.07851	1.16131	-0.140308	-1.92172	-0.256745	0.63784	1.79039	1.37074		4	1.03224	0.0441131
	2.30661	1.16396	-0.478756	-1.67601	-0.220448	0.529787	2.06971	1.49489		4	1.05879	0.066181
	1.96809	1.13999	-0.330037	-1.98917	0.356307	0.477041	1.41344	1.3721		4	0.954822	0.0110747
	2.56594	1.06082	-0.101218	-2.14183	0.24875	0.546554	2.28657	1.3428		4	1.08808	0.0995135
	1.80463	0.691429	0.0669406	-1.8935	0.39332	0.531571	1.53817	1.47658		4	0.963026	0.0130065
	2.88115	0.536279	-0.0518293	-1.79485	-0.26049	0.898841	2.25702	1.45816		4	1.1087	0.129439
	1.90323	0.861784	0.103274	-1.89298	0.0239491	0.557611	2.38192	1.29876		4	1.08722	0.0983896
	1.83068	0.661595	-0.416209	-2.20849	0.00153133	0.540183	1.76639	1.73664		4	0.978727	0.0175249
	2.63174	1.05112	-0.0774844	-1.5166	-0.217851	1.19285	1.57995	0.65945		4	1.07569	0.0841653
	2.06634	1.60043	-0.390977	-2.32018	0.0736019	0.504809	1.39885	1.22679		4	1.01571	0.0336787
	2.19583	1.14365	-0.114103	-2.2864	-0.0175698	0.892768	1.30918	1.42934		4	0.991196	0.0220108
	1.76437	1.13416	-0.301244	-1.93178	-0.0944844	0.599905	1.18678	1.77943		4	0.960857	0.0124694
	1.74751	0.760232	-0.00633561	-2.24372	-0.148872	0.222651	1.71693	1.47836		4	1.0035	0.0273534
	2.52414	1.21886	0.0798826	-2.43027	-0.114249	0.785716	2.26809	1.08995		4	1.12805	0.162726
	1.67042	0.564115	-0.945407	-1.74548	-0.596	0.619421	1.58168	1.49393		4	0.989622	0.0213959
	2.21554	0.703647	-0.190561	-1.76634	-0.0262231	0.362957	1.41998	1.40962		4	0.954777	0.0110647
	1.9877	1.13046	-0.277158	-1.90459	-0.124471	0.812545	2.01316	0.613878		4	1.07183	0.0797594
	1.34989	1.20301	0.067379	-1.79175	-0.0255301	0.678987	2.2917	1.06681		4	1.10784	0.128086
	1.75573	1.02485	0.0556404	-2.38522	-0.753722	0.153096	1.40338	1.32792		4	1.04698	0.0554918
	1.42132	1.15308	-0.0249982	-1.87149	-0.129765	1.07112	2.35056	1.50069		4	1.11697	0.143034
	2.33733	1.47836	-0.257184	-2.36613	-0.0851099	0.555306	1.67139	0.753773		4	1.06512	0.0725342
	2.37016	0.539331	-0.377225	-2.06469	0.228941	0.930287	1.74737	1.4379		4	0.985103	0.0197104
	2.01476	1.06345	-0.484318	-2.26788	-0.242611	0.827205	2.17498	1.11761		4	1.07182	0.0797515
	2.29271	1.62359	-0.440063	-2.39127	-0.0631541	0.139212	1.44485	1.03187		4	1.04365	0.0527356
	1.72059	1.05155	-0.0880479	-1.68692	0.034805	0.920042	1.70273	1.30672		4	1.01198	0.0316268
	2.59065	1.33211	-0.0893412	-2.28208	-0.421024	0.786475	2.41233	0.975915		4	1.16194	0.233264
	2.03497	1.40847	0.249619	-1.83037	0.0876653	0.423915	2.16748	1.13935		4	1.10294	0.120515
	1.65844	1.16956	-0.221463	-1.86846	0.783461	1.15048	2.4313	1.49194		4	1.10745	0.127465
	1.63027	1.40731	0.248196	-1.98171	0.427324	0.676651	1.83689	1.53062		4	1.05748	0.06492
	1.72755	1.1152	-0.387437	-1.94343	0.471053	0.967115	1.4261	1.30056		4	0.964177	0.0132996
	1.75402	0.672065	-0.148265	-1.68978	-0.117927	0.705202	2.02698	1.37237		4	1.02726	0.0407272
	1.7278	0.867317	-0.532658	-1.59609	0.203367	0.507216	1.50343	0.553344		4	0.983523	0.0191481
	1.97334	0.586159	0.0731663	-2.13385	-0.753722	0.790602	1.52895	1.64281		4	1.03334	0.0448949
	2.70789	0.571573	-0.442912	-2.15124	0.293841	0.698835	1.54263	1.29231		4	0.97626	0.0167367
	1.98066	1.01774	-0.120599	-1.96943	-0.753722	0.522524	2.21166	1.44399		4	1.10617	0.125468
	1.95466	0.743172	0.0459581	-2.09036	0.284739	0.56615	1.44335	1.43939		4	0.958538	0.0119163
	2.55469	0.870296	0.122345	-1.75038	-0.0104427	0.526	2.09573	1.61566		4	1.07227	0.0802529
	1.74953	1.12217	0.0564305	-2.39066	-0.224215	1.19285	1.42708	1.52307		4	1.03533	0.0463307
	2.23053	0.836419	-0.419686	-2.43186	0.354768	0.709938	1.61335	1.28711		4	0.977291	0.0170623
	2.3848	0.96887	-0.488795	-1.27183	0.422744	0.959773	1.18233	1.55796		4	0.960961	0.0124947
	2.12554	0.626122	-0.239409	-1.7768	-0.274207	0.505915	1.50778	0.158823		4	1.0417	0.0511742
	1.86347	1.19033	0.31394	-1.65895	0.751689	0.728499	1.89872	1.17281		4	1.05642	0.0639152
	1.92206	0.66527	-0.317732	-1.90082	0.0533013	0.707028	1.69488	1.39374		4	0.968466	0.0144426
	1.59612	1.15511	-0.327657	-1.87229	0.175509	0.477672	1.59534	1.52745		4	0.98062	0.0181509
	2.6968	0.566691	-0.44812	-1.9099	0.216663	0.842117	0.473418	1.66938		4	0.917191	0.00506775
	1.99124	1.26977	0.0845974	-2.22456	0.682957	0.523633	1.41485	1.36736		4	0.992769	0.0226401
	1.75275	1.11444	-0.298948	-1.80684	0.520372	0.490131	0.649545	1.74143		4	0.902881	0.00369287
	2.49411	1.3175	-0.179524	-1.29238	0.091562	0.638611	2.1337	0.902178		4	1.10326	0.121
	2.56232	0.533642	-0.945407	-1.81943	-0.0198143	0.492374	1.58553	1.24008		4	0.972933	0.0157219
	1.74922	1.14809	-0.0756114	-1.84108	-0.501769	0.678947	1.72795	1.61632		4	1.04525	0.054044
	2.0461	1.16889	0.123444	-1.45646	0.189132	0.709855	1.74453	1.22638		4	1.03325	0.044827
	2.21618	1.1301	-0.576362	-1.86913	-0.0373595	0.929754	1.27322	1.22106		4	0.969289	0.0146713
	2.2749	1.13233	-0.318213	-1.19132	-0.0304108	0.918051	1.79767	0.971365		4	1.05274	0.060516
	2.27117	1.11822	-0.217591	-1.13171	0.411467	1.06624	2.51793	1.44191		4	1.13511	0.176148
	1.90107	0.934665	0.0052259	-2.03048	0.218574	0.697582	1.56624	0.89162		4	0.993436	0.0229116
	2.68331	1.0661	0.269068	-1.58295	0.197737	0.733626	2.3526	1.4528		4	1.12898	0.16446
	2.26931	0.986709	0.062688	-1.58666	-0.0142097	1.19285	1.07844	1.44496		4	0.990828	0.0218656
	2.89538	0.698142	-0.11276	-1.87643	-0.145012	0.640523	1.17928	1.47422		4	0.991976	0.022321
	2.52399	1.26703	0.104257	-1.51793	-0.0375235	0.767273	1.99754	1.50064		4	1.0892	0.100993
	1.83398	0.584352	-0.360932	-1.7177	0.275337	0.500236	1.42818	1.32081		4	0.926153	0.00614529
	1.5504	1.08257	-0.233449	-1.62755	-0.0367019	0.608816	1.94701	1.32661		4	1.03317	0.0447744
	1.59131	0.92458	-0.276603	-1.85837	0.145293	0.779672	1.67451	1.31086		4	0.982993	0.0189629
	2.91936	1.22202	0.213164	-1.78734	0.042131	0.715768	2.05694	1.11084		4	1.11827	0.145272
	1.95419	1.17079	-0.654858	-2.41989	0.0996448	0.477236	1.49727	1.68503		4	0.980989	0.0182752
	1.68749	0.533642	0.0117519	-1.6045	-0.118593	0.664885	1.93171	1.37919		4	1.02222	0.0375155
	1.54972	1.12684	-0.263824	-1.92328	0.0673226	0.589772	2.16864	1.39267		4	1.05561	0.0631583
	2.72134	0.932343	-0.0199759	-1.82292	0.17672	0.789699	1.41934	1.54914		4	1.00286	0.0270491
	2.60589	0.537724	-0.639934	-1.86487	-0.268174	0.736048	1.56017	1.49495		4	0.98605	0.0200538
	1.7723	1.07818	-0.472583	-2.06088	-0.486002	0.536592	2.4151	1.53633		4	1.10532	0.124156
	2.31046	0.985137	-0.0331799	-1.72847	0.406906	0.417149	2.51793	1.65428		4	1.10691	0.126616
	1.72339	1.31434	0.154152	-1.33298	-0.142024	0.991477	2.33956	1.51932		4	1.13774	0.181321
	1.92408	0.766905	-0.169537	-1.94576	0.31948	0.734407	1.1618	1.56516		4	0.922065	0.0056308
	1.9594	1.62745	0.0284939	-2.08853	0.22021	0.433835	1.82586	1.24973		4	1.06407	0.0714435
	1.68722	1.10389	-0.782587	-2.41749	0.0492986	0.509012	1.57369	1.59619		4	0.983805	0.0192477
	1.65292	1.17355	-0.181119	-1.59544	0.45204	0.213997	1.67029	1.33678		4	0.994482	0.0233429
	1.97907	0.931137	-0.300882	-2.43027	0.122239	0.773679	2.04039	1.69735		4	1.03884	0.0489484
	2.04607	0.550524	-0.39221	-1.79681	0.287451	0.897193	2.22138	1.3972		4	1.03445	0.0456869
	1.96324	1.26722	-0.465434	-1.78729	-0.0692119	0.372979	1.14929	0.98642		4	0.965728	0.0137035
	2.11049	1.18654	-0.69517	-2.22733	-0.0886945	0.734498	1.997	1.69558		4	1.04448	0.0534146
	2.52169	1.22193	-0.168923	-1.88528	0.366755	0.832241	1.7474	1.50171		4	1.02935	0.0421228
	2.36266	0.936118	0.231348	-2.19393	0.306726	0.860365	1.76258	1.42453		4	1.03505	0.0461275
	1.97473	1.23323	0.162115	-1.44396	-0.0730876	0.670335	1.55384	1.09184		4	1.03367	0.0451288
	2.55613	1.09523	-0.14942	-1.85916	0.053468	0.559683	1.18175	1.13713		4	0.978208	0.0173563
	2.6052	1.62745	-0.218972	-1.78301	-0.181718	0.836108	1.68065	1.6203		4	1.08096	0.090465
	2.1112	1.09012	-0.770462	-1.80689	-0.414615	0.670903	2.51793	1.68676		4	1.11958	0.147524
	2.76303	1.07818	-0.0118654	-1.20495	-0.104451	0.752505	1.62496	1.31371		4	1.06146	0.0688012
	2.71217	0.734322	0.0315864	-1.92315	-0.120282	0.49228	2.51793	1.34794		4	1.128	0.162626
	2.92738	1.38689	-0.504437	-1.733	0.2555	0.461404	0.690904	1.36831		4	0.98591	0.0200026
	1.98207	1.14772	0.0209384	-1.59303	-0.136285	0.881104	2.02698	1.00264		4	1.07553	0.0839767
	2.36791	0.995834	0.0311514	-2.36176	0.164175	0.0803154	2.40454	1.51516		4	1.10895	0.129845
	2.71967	1.18307	-0.504479	-1.88803	0.219628	0.753929	1.60092	1.28328		4	1.0145	0.0329996
	2.27578	0.903315	-0.0864377	-2.19155	0.0329604	0.530394	1.17317	1.39052		4	0.954237	0.0109471
	3.22055	0.618143	0.31208	-1.65367	0.174858	0.745328	2.07153	1.25646		4	1.12138	0.150669
	2.09017	0.960565	-0.32142	-2.27424	0.183129	0.458606	1.32607	0.967839		4	0.958329	0.0118676
	1.85542	0.661843	-0.0166455	-1.80584	0.233211	0.879127	1.47236	1.48209		4	0.961705	0.012677
	2.12315	1.51077	-0.437743	-1.9298	0.0461293	0.559626	1.55557	0.235949		4	1.06838	0.0759744
	3.06877	1.1818	-0.142322	-1.95989	-0.753722	0.880417	2.17855	1.27281		4	1.16752	0.246324
	1.77087	1.03144	-0.624162	-1.8091	0.281274	0.612149	0.863628	1.79147		4	0.906973	0.00404698
	1.99651	1.00692	-0.873334	-2.16032	0.308418	0.597647	1.60112	1.59146		4	0.965424	0.0136234
	1.92107	1.1408	-0.21504	-2.18254	0.472304	0.496879	1.2906	-0.069347		4	1.04708	0.0555701
	1.71944	0.654674	-0.251872	-1.38493	0.19647	0.725255	1.59598	0.706617		4	0.992586	0.0225661
	1.8455	0.533642	-0.475073	-1.91405	-0.0767802	0.589729	1.32038	1.53574		4	0.922041	0.00562789
	1.97983	0.676766	0.0111381	-2.15535	-0.00765445	0.318633	2.26207	0.820413		4	1.07604	0.0845693
	2.73623	0.943307	-0.408637	-2.34079	0.212235	0.487695	1.64234	1.12466		4	1.01365	0.0325353
	2.15774	1.62745	0.00879376	-1.3948	0.184877	0.763284	2.12464	1.28528		4	1.11106	0.133235
	2.18435	0.923166	-0.368639	-1.54572	-0.206184	0.461626	1.08359	1.50616		4	0.947954	0.00965434
	2.01254	0.606064	-0.823901	-1.90171	0.0888429	0.807263	2.1042	1.6135		4	1.016	0.0338407
	2.4067	0.541184	0.0496692	-2.39994	-0.150665	0.521123	2.48407	1.4401		4	1.1128	0.136062
	2.65924	1.01541	-0.194949	-1.48071	-0.0222143	0.747438	1.08451	1.39855		4	0.982155	0.0186726
	1.75845	1.19202	-0.181018	-2.01064	-0.246476	0.558098	1.54464	1.51123		4	1.00432	0.0277449
	2.3209	0.533642	-0.422017	-2.23585	0.178169	0.723019	1.65623	1.36325		4	0.968192	0.014367
	2.45681	0.577124	-0.282451	-1.78154	-0.0837162	0.561406	0.549097	1.61768		4	0.915531	0.0048877
	1.8726	0.763581	-0.0461793	-2.29919	0.783612	0.542488	2.45272	1.43385		4	1.08575	0.096479
	1.96538	1.60384	0.21243	-2.3141	0.176625	0.782445	1.76173	1.26532		4	1.07798	0.0868576
	2.14569	1.59205	-0.434344	-1.79499	0.598374	0.520025	2.51793	1.07826		4	1.13104	0.168324
	2.03671	1.56279	-0.0648077	-1.39469	0.307143	0.509716	1.53141	1.3979		4	1.02795	0.0411829
	1.98303	1.5946	-0.304167	-2.25263	-0.0641545	0.790799	1.56874	1.37442		4	1.03878	0.0489071
	1.85195	0.881285	-0.263016	-2.28056	-0.196444	0.894246	1.41447	1.2362		4	0.980578	0.0181371
	1.75203	0.686641	-0.51847	-2.26277	-0.0629752	0.68501	0.989657	1.3586		4	0.912778	0.0046017
	1.65152	0.974742	-0.363626	-1.55101	0.334384	0.511413	1.10885	1.24469		4	0.920371	0.00542908
	1.84814	1.38114	0.250568	-1.732	0.783612	0.662256	1.56938	0.502914		4	1.05847	0.0658678
	1.90112	1.60106	-0.23478	-1.61156	0.040147	0.746343	1.88133	1.25912		4	1.06521	0.0726261
	1.8541	1.15084	0.271895	-2.11245	0.420848	0.858371	1.49833	1.56167		4	1.01143	0.0313361
	1.34989	0.858189	-0.134846	-1.87908	0.736492	0.315047	2.02527	1.29808		4	1.02744	0.0408461
	2.23264	0.540072	0.0333931	-2.41341	0.185914	0.784413	2.41295	1.25791		4	1.09202	0.104809
	2.89382	0.711553	-0.13384	-2.2775	-0.134084	0.922319	2.12556	1.35858		4	1.09358	0.106951
	2.29578	1.20778	-0.173101	-1.93076	-0.00858958	0.849768	1.72494	1.41353		4	1.02604	0.0399298
	1.58291	1.16096	-0.232579	-1.85394	0.13069	0.983592	1.97367	1.34092		4	1.04323	0.0523955
	1.81241	1.12143	0.295973	-2.39286	-0.337616	0.703373	2.12972	1.61335		4	1.10826	0.128746
	2.18807	1.37661	-0.0143485	-1.83869	-0.00182955	0.847801	1.58303	1.70302		4	1.03348	0.0449909
	2.36244	1.08774	-0.470685	-1.79368	0.273401	0.608079	1.67233	1.81758		4	0.996218	0.0240736
	2.74478	0.903859	-0.358753	-1.87401	0.129652	0.158258	2.13727	1.67979		4	1.06692	0.0744162
	3.14496	1.12873	0.0782004	-1.36038	-0.0726816	1.01849	1.28064	0.235949		3	1.2699	0.639846
	1.68071	1.14789	-0.396526	-2.34923	-0.054079	0.72879	2.33086	1.30429		4	1.08753	0.0988003
	2.00253	0.533642	-0.180882	-1.78957	0.299065	0.61993	2.04296	1.45631		4	1.00834	0.0297315
	1.91221	0.594188	-0.320707	-1.67896	0.265841	0.548292	2.4525	1.48994		4	1.06424	0.0716218
	2.01751	0.53473	-0.519524	-1.8113	-0.0275349	0.538214	2.01961	1.09192		4	1.00704	0.0290739
	1.73687	0.540218	0.033699	-2.28959	-0.234258	0.804695	1.93736	1.34542		4	1.03493	0.0460349
	2.03975	0.540345	-0.0311221	-2.43027	0.783612	0.0803154	1.65039	1.29248		4	0.987785	0.0206966
	1.73094	1.20424	0.149087	-2.43027	-0.57295	0.761415	2.3989	1.10191		4	1.15658	0.221111
	1.41749	0.539486	0.0499994	-1.95222	-0.213036	0.804737	1.53769	1.44986		4	0.993851	0.0230817
	1.96111	1.0974	-0.312258	-2.06377	0.220695	0.723923	1.22819	1.25556		4	0.945914	0.00926436
	1.813	1.60603	-0.149337	-1.89307	0.219964	0.88689	1.51482	1.28242		4	1.02742	0.0408305
	1.85009	1.03526	-0.558198	-1.74838	0.0607366	0.168865	1.66178	1.72104		4	0.981921	0.0185924
	2.29913	0.655995	-0.945407	-1.88387	0.143044	0.737165	1.48237	1.8221		4	0.954775	0.0110643
	2.74353	1.62745	-0.225156	-2.25065	-0.308492	0.618201	1.70275	1.09917		4	1.09966	0.115634
	2.35269	1.62745	0.0494598	-1.84697	0.0372616	0.784638	1.56242	0.860832		4	1.06915	0.0768142
	2.00618	1.12623	-0.48488	-1.95813	-0.0219961	0.401543	2.46198	1.38149		4	1.09066	0.102963
	1.98104	0.540018	-0.3076	-1.64972	0.395825	0.748363	1.50913	1.24586		4	0.94209	0.00857044
	1.99842	0.70769	0.282097	-2.04093	0.402086	0.280137	1.58934	1.24653		4	0.991271	0.0220405
	1.9776	0.558022	0.31394	-1.93286	0.424407	0.527306	2.28624	1.8221		4	1.07712	0.0858335
	2.21863	1.10713	0.0651693	-1.79369	-0.0735482	0.893083	1.52354	1.39459		4	1.01465	0.0330871
	2.88914	1.26305	0.138237	-1.7716	0.491884	0.825918	1.74918	1.6845		4	1.07561	0.0840733
	1.80377	0.995152	-0.390405	-2.40886	-0.290954	0.586632	1.87109	1.30176		4	1.02981	0.0424355
	1.97085	1.07114	0.126289	-2.36356	-0.132861	0.653783	0.936582	1.12462		4	0.980095	0.0179756
	2.01866	1.11544	-0.315174	-1.92032	0.193572	0.707551	1.59422	1.48515		4	0.979989	0.0179402
	1.93344	0.916356	0.0374735	-1.4729	-0.180207	0.592679	1.61812	0.605776		4	1.03777	0.0481385
	1.91882	1.13706	-0.073203	-1.96181	-0.305596	0.809739	1.94043	1.5119		4	1.05578	0.063317
	2.87857	0.932882	-0.778795	-1.76319	-0.265609	1.08876	2.51793	1.50986		4	1.14818	0.202791
	2.91713	1.10926	-0.0702587	-2.30594	-0.100119	0.207742	1.87075	1.70036		4	1.08433	0.0946689
	1.56885	1.06962	0.0110081	-2.43027	-0.0904708	0.590136	2.27709	1.56685		4	1.09492	0.108823
	2.11889	0.798267	0.0792858	-1.8081	0.783612	0.435797	1.47681	0.997126		4	0.974702	0.0162547
	2.80381	0.539951	-0.478133	-1.81761	0.0618207	0.594837	1.04565	1.48661		4	0.943694	0.00885577
	2.17589	1.14849	-0.390043	-2.05628	-0.160176	0.59881	1.55103	1.3121		4	0.994355	0.0232899
	1.64168	1.28993	-0.0610686	-1.87786	0.215511	0.847835	1.52825	1.3374		4	1.00319	0.0272066
	2.13361	0.847463	-0.0547251	-1.85061	0.12062	0.698465	1.81018	1.59512		4	1.00569	0.0284074
	1.70717	0.58959	-0.121742	-1.78549	0.453722	0.7689	1.08424	1.40079		4	0.910331	0.00436006
	2.19798	0.539122	-0.488337	-1.77167	-0.106307	0.648168	1.6169	1.23054		4	0.964487	0.0133796
	2.9076	1.29291	0.31394	-2.28614	-0.291831	0.68494	2.45127	1.4254		4	1.18774	0.296728
	2.04337	1.04194	0.256	-1.30937	0.362475	0.560518	2.06658	0.560477		4	1.09719	0.112052
	1.92027	1.13882	-0.262247	-1.92387	-0.23758	0.67612	2.201	0.688014		4	1.09336	0.106651
	1.60815	0.982626	-0.536499	-1.91995	0.282862	0.534214	0.830203	1.24222		4	0.896811	0.0032185
	2.7888	1.278	0.16629	-1.92158	-0.565988	0.784269	1.71601	1.41303		4	1.10608	0.125329
	1.36878	0.940131	-0.216345	-1.36063	-0.536826	1.19285	0.923478	1.52478		4	1.01409	0.0327734
	1.9894	1.10605	-0.398913	-1.84073	0.446021	0.750851	1.62777	1.45423		4	0.975672	0.0165532
	1.71573	1.16275	-0.367131	-1.83605	0.30133	0.75044	1.69829	1.25937		4	0.991601	0.0221714
	2.11405	1.14349	0.199463	-1.78374	-0.27443	0.455242	2.23255	0.235949		4	1.15154	0.210008
	2.06018	1.25987	0.288366	-2.28236	-0.151916	0.923637	2.01092	1.41665		4	1.09695	0.111711
	2.57781	1.08226	-0.813317	-2.24849	-0.217735	0.694945	2.13676	1.31981		4	1.07687	0.085547
	2.21478	1.27253	0.324849	-2.21981	0.372996	0.501042	1.51899	1.57355		4	1.02863	0.0416403
	1.85091	1.60075	-0.0810098	-2.33896	-0.604919	0.340443	1.08624	1.73937		4	1.05273	0.0605097
	2.91671	1.15097	0.0644869	-1.60022	-0.0813789	1.01649	2.45857	1.39006		4	1.16497	0.240314
	2.30795	0.538258	0.280085	-2.39486	0.185776	0.910357	2.01278	1.8221		4	1.06655	0.0740311
	2.07497	0.640256	-0.929425	-2.43027	0.00895646	0.866303	2.14335	1.50736		4	1.03923	0.0492484
	2.51313	1.18681	0.309274	-1.52025	0.314375	0.33917	2.03158	1.56137		4	1.08821	0.0996912
	1.82287	0.667981	-0.548103	-1.76134	-0.0140748	0.658545	1.22076	1.50519		4	0.917023	0.00504921
	2.95544	1.62745	-0.431563	-1.516	0.167387	0.564532	1.99037	1.71867		4	1.11695	0.143012
	2.22561	1.14125	-0.480249	-1.28546	0.0386984	0.563699	1.6933	1.25151		4	1.01292	0.0321357
	1.73859	1.56626	-0.246065	-2.43027	0.615598	1.19285	1.69873	1.32007		4	1.05945	0.0668229
	1.99724	1.02793	-0.401191	-1.90662	-0.0471782	0.538696	1.73875	1.25061		4	0.994023	0.0231529
	1.99443	1.12232	0.160811	-1.74454	-0.0888624	0.595422	1.32676	1.81213		4	1.00108	0.0262246
	2.21886	1.25398	-0.474061	-1.36098	0.240951	0.609894	1.91864	0.639778		4	1.05986	0.0672226
	3.08297	0.90319	0.0666283	-1.83299	0.0717737	0.723366	1.54039	1.67412		4	1.0517	0.0595883
	1.97507	1.10209	-0.114794	-1.87821	0.0260804	0.619263	1.56981	1.43149		4	0.989252	0.0212534
	1.37099	1.09132	-0.773312	-1.40668	0.177568	0.62753	1.48646	1.42571		4	0.976475	0.0168042
	2.89374	1.2855	-0.182422	-1.68949	0.0956418	0.458997	1.61169	1.58038		4	1.04873	0.0569809
	1.98433	1.13068	-0.455705	-2.09898	0.368058	0.648132	0.891134	1.68779		4	0.918338	0.00519556
	2.08041	0.995092	-0.0681904	-1.91534	-0.129015	0.575633	2.14075	1.61311		4	1.06	0.0673598
	2.01328	1.15233	-0.258537	-1.625	-0.259507	0.731295	1.5881	1.8221		4	1.01644	0.0340905
	2.34584	1.15537	-0.0920442	-2.04412	-0.753722	0.822783	1.71106	1.57475		4	1.07744	0.0862122
	2.65282	0.850751	-0.455242	-2.39599	0.360673	0.717211	1.41587	1.35978		4	0.978321	0.017393
	1.91545	0.946328	0.223453	-1.79526	0.313535	0.494091	1.49997	1.58579		4	0.9867	0.0202924
	2.01481	0.614078	0.0625848	-1.77058	-0.129753	0.416785	1.03032	1.31296		4	0.940131	0.00823278
	2.20717	0.585165	0.211139	-1.73983	-0.110439	0.0803154	1.59646	1.46825		4	1.00565	0.0283873
	2.05776	1.13101	-0.288413	-1.66322	0.0700976	0.724338	1.61458	1.25576		4	0.99308	0.0227663
	2.2158	0.562627	0.0403318	-1.91387	-0.0817401	0.388246	1.89378	1.09556		4	1.02174	0.0372195
	2.32389	0.967925	-0.21984	-1.76582	0.31801	0.786986	1.68023	1.75635		4	0.997535	0.0246405
	1.70373	1.1789	0.0540518	-2.03432	0.138795	0.646168	2.22449	1.8221		4	1.08397	0.0942073
	1.99993	1.11698	-0.945407	-1.33274	0.159055	0.719529	2.207	1.61315		4	1.06529	0.0727088
	2.33113	1.12783	0.31394	-1.81028	0.452958	0.555932	1.65989	1.26211		4	1.02988	0.0424828
	1.74831	1.50072	-0.337935	-1.95661	-0.378579	0.534708	1.64667	1.69048		4	1.04615	0.0547893
	2.27709	1.21932	-0.440269	-1.89847	0.145201	0.523095	2.11032	1.36147		4	1.05073	0.0587222
	1.81866	1.18883	-0.202098	-1.67786	0.337085	0.956745	1.97295	1.50166		4	1.03926	0.0492762
	2.00936	1.17799	0.0282197	-2.14253	0.104346	0.690929	2.1641	1.18565		4	1.07494	0.0832923
	1.94268	0.714158	-0.325147	-1.84018	0.783612	0.841776	2.43814	1.779		4	1.07604	0.0845679
	2.22671	0.928244	-0.292967	-1.84764	0.78316	0.896787	1.93084	1.40004		4	1.01755	0.0347296
	2.01892	0.921473	-0.440713	-2.23085	0.271495	0.807656	2.06811	1.30699		4	1.02731	0.0407615
	1.92531	0.746312	0.187522	-1.91991	-0.280993	0.645404	1.75874	1.26878		4	1.02639	0.0401563
	2.14959	0.864283	-0.308571	-1.67809	0.160612	0.134956	0.461203	1.43988		4	0.900766	0.00352091
	1.74711	1.16841	-0.335079	-1.88594	-0.273747	0.112515	1.68223	1.79818		4	1.01947	0.0358527
	2.12153	1.09368	-0.713121	-1.73048	-0.0767136	0.846999	1.5102	1.29254		4	0.982174	0.0186793
	2.83245	1.02092	-0.380312	-2.20441	-0.416169	1.00121	1.34929	1.61966		4	1.03802	0.0483303
	2.51733	0.852471	-0.245169	-1.19553	0.407892	0.542293	2.39563	1.50959		4	1.09856	0.114025
	2.09155	1.11236	-0.262722	-2.43027	0.225105	0.758511	2.28071	1.4445		4	1.07862	0.0876174
	2.35182	1.21067	-0.0564897	-1.76593	0.751362	0.793743	1.33614	1.32094		4	0.983689	0.0192067
	2.89966	0.538451	0.0414793	-1.48365	0.615396	0.922256	1.08615	1.29474		4	0.98588	0.0199918
	2.10999	1.62745	-0.293252	-1.77808	0.0816957	0.902185	2.51793	1.22476		4	1.14776	0.201886
	2.72412	1.09811	0.0649018	-1.68826	-0.379596	0.508905	2.10666	1.26321		4	1.11018	0.131805
	2.10615	1.62745	0.0740506	-1.87817	0.277083	0.226154	1.61605	1.15065		4	1.0482	0.0565238
	2.7915	1.16744	0.31394	-1.49144	-0.321099	0.684214	0.705986	1.70858		3	1.2113	0.388349
	2.09708	0.535474	-0.945407	-1.75072	0.121371	0.452989	1.84363	1.21635		4	0.977735	0.0172041
	1.71567	0.940211	0.0452286	-1.79559	0.196831	0.235045	1.98586	1.46654		4	1.03047	0.042884
	1.89095	0.96983	-0.203216	-1.2614	0.453279	0.570513	1.58732	1.20559		4	0.983033	0.0189766
	2.09559	0.756716	0.165868	-2.01691	0.208225	0.988769	1.54137	1.61678		4	0.996296	0.0241068
	2.04088	1.30139	-0.0301596	-1.75823	-0.767648	0.546525	2.20845	1.20001		4	1.1331	0.172254
	2.30456	0.993712	-0.235603	-2.26588	-0.105145	0.673108	2.10707	0.235949		4	1.11143	0.133821
	1.8475	0.899622	-0.34198	-1.79432	0.464307	0.579132	2.00275	1.2989		4	1.00732	0.0292126
	2.81279	1.40418	-0.25626	-2.3255	0.405602	0.511651	1.52933	0.844298		4	1.05199	0.059842
	2.42079	1.02235	-0.315698	-2.24752	-0.0234111	0.630349	1.8685	0.235949		4	1.08401	0.0942653
	2.20693	1.1431	-0.451155	-1.82027	0.14606	0.437434	1.83763	1.3114		4	1.00876	0.0299415
	2.00818	1.2598	-0.188405	-2.26243	0.205014	0.948075	1.83171	1.57342		4	1.03669	0.0473306
	2.21681	1.10064	0.0205785	-2.08274	-0.12548	0.634794	2.13055	1.24726		4	1.07509	0.083471
	2.13706	1.11228	-0.15093	-2.19888	-0.155828	0.488624	2.10271	0.81151		4	1.07738	0.0861471
	2.9371	1.20473	-0.168347	-1.79252	-0.0170088	0.554996	2.1249	1.36078		4	1.10335	0.121144
	1.67942	1.33174	-0.23907	-1.83941	0.207746	0.753894	1.46777	1.14348		4	0.991626	0.0221815
	2.00768	1.0407	-0.108401	-1.85651	0.0398167	0.680845	2.39781	1.40376		4	1.08846	0.100016
	2.21814	0.572573	0.110695	-2.34094	-0.237618	0.88903	1.61402	1.39786		4	1.01574	0.0336942
	2.99078	1.48216	0.0758566	-2.36721	0.14398	0.455098	1.7393	1.40112		4	1.10086	0.117398
	2.22535	0.725772	-0.356131	-1.88519	0.49818	0.744449	1.76541	1.32655		4	0.977801	0.0172253
	2.40885	1.36028	-0.451487	-2.43027	0.198064	0.615466	1.44177	1.32633		4	1.00599	0.0285559
	2.01826	1.59798	-0.532033	-1.93301	0.395966	1.03546	1.07995	1.60821		4	0.985983	0.0200292
	1.74625	1.40462	-0.479425	-2.29575	-0.0140369	0.717843	1.87993	1.31824		4	1.04456	0.0534749
	1.8444	1.11752	-0.429448	-2.08395	-0.312563	0.745404	2.38694	1.43538		4	1.09739	0.112336
	1.9996	1.0608	-0.423736	-1.76927	-0.299578	0.759961	1.39382	1.33952		4	0.980781	0.018205
	1.87694	1.07771	0.263191	-2.22856	0.16877	0.746288	1.68203	1.37422		4	1.02717	0.0406696
	2.18891	0.909139	-0.419387	-1.80307	-0.136888	0.795774	0.562256	1.31669		4	0.920393	0.00543166
	2.74669	0.538513	-0.125256	-1.49172	0.257011	0.638513	1.36574	1.09187		4	0.983058	0.0189855
	2.58555	1.04148	-0.00803831	-1.61794	-0.323829	0.151397	2.18149	0.967929		4	1.11159	0.134089
	1.63139	1.21273	-0.173513	-1.8245	0.193084	0.781962	2.45118	0.235949		4	1.15037	0.207465
	1.68763	0.636895	-0.0475869	-1.88264	-0.0888789	0.861518	1.66514	1.39952		4	0.990808	0.0218577
	1.88923	0.549356	-0.0378395	-2.24024	-0.682278	0.777544	2.38136	1.34415		4	1.11476	0.139319
	3.12339	0.930529	0.246136	-1.84541	0.533862	0.424261	1.67946	1.38114		4	1.06833	0.0759233
	2.1287	1.17938	-0.234113	-1.76221	-0.0952024	0.809646	2.10333	0.421114		4	1.10097	0.117563
	1.71141	0.968619	-0.000553048	-1.88419	0.206628	1.13982	1.73791	1.56772		4	1.02019	0.0362843
	1.7261	0.860193	-0.674399	-2.26016	0.382138	0.574267	1.82633	1.497		4	0.981772	0.0185414
	1.78233	1.16629	0.0305078	-2.17619	-0.0493173	0.774573	1.1351	1.46185		4	0.978267	0.0173757
	1.92876	1.45077	0.184497	-1.727	0.221923	0.748249	1.82074	1.53739		4	1.05934	0.0667164
	2.92428	1.11992	0.232852	-1.75555	0.643668	0.770377	1.61068	1.26492		4	1.05867	0.066063
	2.22322	1.0792	-0.27642	-2.16642	-0.151486	0.750288	1.52822	1.16167		4	0.999968	0.0257179
	2.00959	1.16395	-0.229684	-1.75882	0.354465	1.13885	1.10447	1.43722		4	0.960014	0.0122658
	2.46587	0.937607	0.0262381	-1.74007	0.0659465	0.629782	2.56763	1.61712		4	1.12704	0.160866
	2.09491	1.57617	-0.0558921	-2.43027	-0.270511	0.741846	1.42787	1.41248		4	1.05372	0.0614116
	1.67391	0.692735	0.0670574	-1.7907	0.365542	0.814906	1.47841	1.44342		4	0.965528	0.0136508
	2.02743	1.21725	0.0861744	-1.99005	0.530983	0.194894	2.03959	1.56352		4	1.05507	0.0626541
	3.042	0.733733	0.217823	-1.79946	0.360115	0.426209	2.08135	1.42153		4	1.09504	0.108994
	2.74979	0.740527	0.0844881	-1.23597	-0.0331486	0.0803154	1.43426	1.35529		4	1.03067	0.0430219
	1.82309	1.1275	-0.939524	-1.64421	-0.222562	0.915025	1.69636	1.1011		4	1.01903	0.0355908
	1.8569	1.13993	-0.500346	-1.55779	0.160969	0.698035	1.6893	0.235949		4	1.04981	0.0579159
	2.61539	1.10982	-0.255224	-1.42618	-0.0864625	0.371802	0.51473	1.50479		4	0.965293	0.0135892
	2.1194	1.15746	-0.494141	-1.93697	-0.248975	0.595289	2.0112	1.34189		4	1.04559	0.0543248
	2.91735	0.697058	-0.230687	-1.39765	-0.193181	0.272736	1.68998	1.75206		4	1.04849	0.0567785
	1.99004	1.13463	-0.0587298	-2.19785	-0.120951	0.530423	0.460645	0.826328		4	0.962824	0.0129557
	2.03173	1.15517	0.0810592	-2.07513	-0.232283	0.439549	1.55874	1.40108		4	1.01852	0.0352941
	2.00838	1.23115	-0.370984	-2.17893	0.0573924	0.579369	1.60063	1.26369		4	0.994848	0.0234955
	1.99124	1.11412	0.215192	-1.52504	0.389639	0.819451	1.54008	1.16594		4	1.01195	0.0316124
	2.20055	1.14321	-0.0293906	-2.1554	0.22713	0.288046	1.91822	1.59768		4	1.0369	0.0474911
	2.86367	0.975489	-0.296038	-1.89353	-0.334722	0.608366	1.59728	1.0647		4	1.04408	0.0530892
	2.45384	1.13625	0.0355248	-1.61184	-0.195346	0.859635	1.94417	1.58018		4	1.07527	0.0836708
	1.97986	1.48522	0.31394	-2.22848	-0.127574	0.578932	1.69761	1.26009		4	1.07402	0.0822375
	1.98553	0.573918	-0.302267	-1.57914	0.0530727	1.19285	1.36188	0.90227		4	0.974781	0.0162787
	2.0723	1.0522	-0.058573	-1.89837	-0.0732194	0.628428	2.08189	1.23795		4	1.05495	0.0625423
	1.48389	0.533642	-0.0338488	-2.18581	0.0779766	0.769044	1.25563	1.57863		4	0.949473	0.00995395
	3.22055	1.17036	-0.313543	-2.16018	0.414107	0.749518	1.6867	1.4139		4	1.06959	0.0772926
	2.20019	1.19613	0.0192572	-1.89515	-0.126755	0.46563	2.04893	1.65291		4	1.0687	0.0763231
	2.00672	1.14396	-0.217939	-1.59251	0.226262	0.318861	1.31136	1.6206		4	0.960262	0.0123253
	3.22055	1.03696	0.12678	-1.9897	-0.163607	1.19285	2.26741	1.49933		4	1.17024	0.252822
	2.34679	1.33401	-0.0722745	-2.39973	-0.111391	0.407222	1.35085	1.588		4	1.01876	0.035433
	2.30879	1.12023	-0.304631	-1.44835	0.220585	0.60866	0.658126	1.30309		4	0.9297	0.00662508
	2.08723	1.52772	-0.0733941	-1.80907	-0.499754	0.383623	2.5009	1.30997		4	1.16299	0.235698
	2.15954	1.09048	-0.264379	-1.63903	0.783612	0.784831	1.89672	1.42436		4	1.01969	0.0359841
	1.87145	1.12533	-0.236176	-1.36371	0.292321	0.830185	2.45136	1.26767		4	1.10321	0.120925
	2.12574	0.533642	0.202592	-1.76901	0.287604	0.531252	2.2745	1.29614		4	1.06584	0.073277
	2.9996	1.2173	-0.339833	-1.85668	-0.243143	0.917073	2.37179	1.50772		4	1.14952	0.205645
	1.76278	0.720015	-0.240246	-2.09022	0.400598	0.752019	1.08693	1.41394		4	0.910107	0.00433855
	2.70025	0.838333	-0.314547	-1.94286	0.263915	0.588462	2.40379	1.79328		4	1.09572	0.109955
	2.59652	0.800003	-0.164251	-2.36576	0.0198112	0.744616	1.60852	1.27213		4	1.01004	0.030606
	2.9659	1.03248	-0.39932	-2.11406	-0.753722	0.444504	2.30265	1.52859		4	1.15247	0.212017
	2.17035	1.07011	-0.084756	-2.32683	0.0109636	0.66073	2.18268	1.56226		4	1.07265	0.080676
	2.34156	1.17956	-0.0233786	-1.72446	0.777736	1.19285	2.31202	1.33747		4	1.11032	0.132038
	2.43393	1.20226	-0.305681	-1.88563	0.132599	0.704474	2.11642	0.982372		4	1.07045	0.0782277
	1.77155	0.837824	-0.0526267	-2.36511	0.188732	0.732136	1.48389	1.65275		4	0.976482	0.0168064
	1.34989	1.45412	0.0835491	-2.10373	0.336559	0.814499	1.10523	1.35687		4	0.999945	0.0257074
	1.84221	1.05837	0.200304	-1.59012	0.0496553	0.576294	2.07359	1.33222		4	1.06535	0.0727681
	2.06749	0.992701	-0.047113	-1.3448	0.317028	0.713438	2.45005	0.755164		4	1.11775	0.144377
	1.7248	0.679644	-0.368157	-1.95699	-0.117209	0.541566	2.3569	1.23332		4	1.06167	0.0690097
	3.01367	0.651591	-0.144071	-1.6487	-0.24238	0.641556	1.43646	1.34334		4	1.02734	0.0407829
	1.68383	1.13978	-0.108728	-1.90646	0.642777	0.769013	1.46113	1.49031		4	0.972978	0.0157352
	1.74958	1.14428	-0.945407	-1.36008	-0.284796	0.882273	1.66909	1.53795		4	1.02585	0.039808
	2.2098	0.54531	-0.0557404	-2.07092	0.258172	0.832447	2.42559	1.23306		4	1.08086	0.0903383
	2.32467	1.07391	0.13222	-1.80414	0.36416	0.463897	1.35181	1.48816		4	0.98225	0.0187053
	2.75442	0.932199	-0.428065	-1.96657	-0.0245194	0.770594	2.20245	1.21391		4	1.08099	0.0904949
	2.12573	1.14995	-0.377426	-1.49248	-0.753722	0.91542	1.86808	1.48382		4	1.0842	0.0944981
	2.62397	1.04837	0.145899	-1.76484	-0.753722	0.487315	2.05534	1.29808		4	1.12598	0.15892
	2.29999	1.14411	-0.316794	-2.02329	-0.0372441	0.896958	1.85231	1.31415		4	1.03381	0.0452313
	1.99259	0.811748	-0.355312	-1.94415	0.139247	0.826763	1.6526	1.4232		4	0.970672	0.0150627
	2.70112	1.09916	-0.045803	-2.04715	0.372844	0.546392	1.64234	1.44305		4	1.02227	0.0375455
	2.12182	1.15292	-0.374336	-1.83372	0.10927	0.746257	2.54423	1.39055		4	1.10813	0.128533
	1.49987	0.539271	-0.221068	-1.70644	-0.350098	0.680328	2.44896	1.58151		4	1.09454	0.108292
	2.85764	0.58649	-0.0355458	-1.62389	0.0762929	0.51841	1.8237	1.62114		4	1.04061	0.050319
	2.12975	0.63418	-0.248896	-1.70161	-0.151743	0.623078	2.13719	1.26704		4	1.0399	0.0497628
	2.12832	0.611851	-0.0837916	-2.02727	0.067016	0.543363	1.62895	1.26966		4	0.973095	0.01577
	2.00399	1.11165	-0.390124	-1.88057	-0.103211	0.371146	2.15603	1.17156		4	1.0553	0.0628668
	2.12447	1.12866	-0.439877	-1.83927	0.783612	0.545885	1.62485	1.15419		4	0.978976	0.0176062
	2.86259	1.16882	0.213617	-2.33907	0.154674	0.0803154	1.4924	1.25314		4	1.05919	0.0665706
	2.41455	0.936348	-0.391176	-1.80742	-0.141965	0.765282	2.15939	1.56486		4	1.06129	0.0686317
	2.88704	1.13432	-0.303109	-2.20207	0.67142	0.931359	1.85012	1.20566		4	1.06212	0.0694663
	1.69446	0.832324	0.0701354	-1.92026	-0.338775	0.549513	1.54064	0.240728		4	1.06136	0.0687003
	2.73126	1.11686	-0.516766	-1.79699	0.171042	0.459427	1.97794	1.13211		4	1.05219	0.0600273
	1.92868	1.40828	-0.0961553	-2.00805	0.0708574	0.842495	1.31619	1.6466		4	1.00024	0.025842
	1.99986	1.08979	0.0155161	-2.147	0.439902	0.872527	2.22337	1.32812		4	1.07356	0.0817172
	1.34989	1.62745	0.172504	-2.43027	0.569885	0.455062	1.53311	1.3573		4	1.0566	0.0640821
	2.16266	0.533642	-0.167448	-2.40164	-0.19396	0.551986	1.35324	1.6945		4	0.963746	0.0131892
	2.81396	1.05177	-0.29726	-1.92832	-0.753722	0.779272	1.72863	1.44181		4	1.08713	0.0982698
	1.68906	0.98047	-0.440173	-1.71313	-0.232256	0.917133	2.09425	1.39826		4	1.05257	0.0603645
	1.83847	1.19243	-0.0661555	-1.94652	-0.189435	0.718453	1.7349	1.21371		4	1.02989	0.042492
	2.68235	1.10573	-0.594759	-1.77662	0.0624556	0.503901	2.069	1.38254		4	1.05851	0.0659034
	1.86649	1.49249	-0.200043	-1.73261	0.142637	0.533249	1.4232	1.30203		4	0.999779	0.0256329
	3.04523	0.715468	-0.0721373	-2.35477	0.330898	0.72964	1.90569	1.33975		4	1.06802	0.0755947
	1.97942	1.13484	-0.244773	-2.38473	-0.277637	0.685414	1.64443	1.63721		4	1.02186	0.0372943
	2.89691	0.540378	-0.401562	-1.6678	0.241535	0.205207	2.51793	1.57835		4	1.11385	0.137795
	1.87103	0.780008	-0.314327	-1.78922	0.173914	1.0141	1.58762	1.39278		4	0.970746	0.0150837
	2.38456	1.06636	-0.179176	-1.77293	0.106438	0.808045	1.48526	1.18918		4	0.992189	0.0224063
	1.46475	1.11177	-0.511038	-1.2889	0.143168	0.712908	1.99977	1.05665		4	1.04798	0.0563409
	1.8045	0.749109	-0.945407	-2.07602	0.755749	0.802981	2.40108	1.28701		4	1.06304	0.0703889
	2.84406	0.587318	-0.945407	-1.19553	-0.0348234	0.754636	1.95983	0.235949		4	1.11213	0.134962
	2.07886	1.01458	-0.0767414	-2.05663	-0.154312	0.510354	2.06386	1.36915		4	1.05132	0.0592502
	2.22394	1.15917	0.168753	-2.3907	-0.0785534	0.484982	2.51793	1.31965		4	1.14075	0.187361
	2.44883	1.13679	0.265344	-2.05684	0.29447	1.15867	1.53817	1.662		4	1.04518	0.0539889
	3.02936	0.755427	-0.266626	-1.73544	0.363314	0.728969	2.52429	1.50723		4	1.13151	0.16922
	1.47805	1.13558	-0.0746394	-2.05026	0.0536275	0.646074	2.40629	0.999978		4	1.10697	0.126721
	1.7404	1.62745	-0.256333	-1.75695	0.238327	0.633266	2.40032	1.15216		4	1.12235	0.15239
	1.9262	1.15768	-0.151776	-1.75953	-0.547372	0.405973	1.5592	1.46753		4	1.02671	0.0403637
	2.81165	0.546791	-0.475565	-2.36565	0.783612	0.912978	1.70748	1.39453		4	1.01517	0.0333727
	1.75648	1.09404	-0.317015	-1.80365	-0.315788	0.697417	1.86365	1.11252		4	1.03603	0.0468406
	2.1677	1.19355	-0.0989541	-1.7325	-0.2636	0.361476	2.34587	0.920338		4	1.11503	0.139775
	2.33371	0.967207	0.0684238	-1.67967	0.149769	0.965852	1.5907	1.11794		4	1.01556	0.0335912
	3.06427	0.609188	-0.496059	-2.43027	0.0285696	0.796941	1.95962	1.63483		4	1.07051	0.0782982

## Sheet: Table
				Inverse Transform Sampled Signature Classification
				Drugs:	CBL	Vin	Dox	5-FU
				% correct classifcation:	100	98.3	100	99

## Sheet: Reference RNAi data
test		p53	Chk2	ATR	Chk1	Smg1	DNAPK	Bok	Bim
Dox	1	3.2679	2.57779	1.58908	-0.221982	-2.65248	-1.70809	-0.434403	1.20163
Etop	1	2.65517	3.02971	1.52105	-0.168123	-2.13055	-0.276586	-0.300411	1.64441
CDDP	2	3.1567	2.97941	0.300769	-1.65243	-1.13713	0.909299	-0.0891379	1.17669
MMC	2	3.33521	2.70759	1.14939	-1.3515	-1.32232	0.8487	-0.4262	0.76973
CBL	2	3.5138	3.72247	0.263034	-1.52337	-2.94342	1.00204	-0.262607	0.761709
CPT	3	3.47122	3.1715	1.1375	-1.1561	0.695994	1.6927	-0.599462	1.57956
6-TG	3	3.3644	2.43722	0.399819	-2.25754	0.731183	1.32495	-1.02915	0.740776
TMZ	3	3.75489	3.82782	0.650765	-0.971431	0.378512	0.594549	-0.943416	0.847997
MTX	4	1.48543	0.831045	-0.760032	-2.35064	1.20163	-0.0917189	-0.0740006	1.49057
5-FU	4	1.81869	-0.117798	-0.759248	-2.19406	-0.479739	0.287397	1.34972	1.74483
HU	4	2.59932	-0.340075	-0.736966	-1.94342	0.516015	1.07724	-0.136062	1.07724
VCR	5	0.663695	0.654841	-0.137015	-1.03023	-1.39593	0.293804	-2.64386	0.127241
Taxol	5	1.95233	0.286881	-0.173297	-0.70137	-0.599462	0.645493	-1.8365	0.415673
ActD	6	2.95233	-0.219463	0.941433	-0.305111	-1.60189	-0.171517	-0.494109	0.307205
Rapa	6	1.7866	-0.307327	0.357008	-0.854114	-1.72514	-0.0781323	0.378512	0.545968
SAHA	7	-0.0317148	0.327447	0	-0.760372	-1.9913	0.50974	-0.862496	1.76977
DAC	7	0.31034	0	1.0635	0.0976108	-0.643856	0.201634	-0.0144996	1.81558
trainings
	p53	chk2	atr	chk1	atx	dnapk	bok	bim
Daunorubicin	3.4005	2.6508	1.7485	-0.2176	-2.2515	-0.6897	-0.2688	0.6781
2-Methoxyestradiol	1	-0.3771	-0.152	-0.6215	-2.0589	-0.737	-2.1844	0.4005
Zebularine	0.546	0.0704	-0.1047	-0.9462	-0.8625	0.0676	-0.1844	1.6871
Busulfan	3.5097	3.6949	1.5898	-1.4344	-1.5146	0.848	-0.7612	0.9709
Vinblastine	0.9184	0.5558	0.926	-0.3959	-0.6897	-0.0893	-2.5564	0.0286
Scriptaid	0.5261	0.1763	-0.0439	-0.304	-0.6439	0.2388	-0.811	2.5753
Carmustine	3.7334	3.319	0.4907	-1.8463	-0.8417	0.4108	-0.075	1.3325
Mitoxantrone	2.9653	2.8914	1.3018	-0.7217	-1.5564	-1.7722	-0.624	0.9901
Thiotepa	3.7442	3.848	0.9245	-1.9114	-1.5995	0.841	-0.1654	1.1026
Gemcitabine	1.5801	0.903	-0.5995	-1.1422	1.0496	0.5361	0.4114	1.2768
Melphalan	3.511	3.3219	0.735	-1.9059	-0.737	0.8833	-0.3731	0.9337
Carboplatin	3.433	2.7071	0.5755	-0.9877	-1.4344	0.8559	-0.0937	1.3008
Streptozocin	2.5993	2.4195	0.5361	-1.0038	0.5558	0.4803	-0.152	0.9848
Maphosphamide	3.511	3.3219	0.5945	-1.0679	-0.7418	0.7991	-0.1203	1.2928
Irinotecan	3.7866	3.5361	0.5685	-1.1844	-0.0058	0.6415	-0.5995	1.189
Sunitinib	0.6016	1.4709	-0.1006	-0.0114	0.348	0.2213	0.2141	1.546
Canthardin	1.0827	0.1257	0.9546	-1.4659	-1.5606	1.3109	-0.5886	0.364
AA2	0.263	0	0	-1.3219	-0.8365	-0.3219	-0.5778	-0.0589
Noscapine	1.9507	0.532	0.3707	-0.7524	-0.5961	0.2572	-2.4166	0.7986
Erlotinib	2.2075	0.0174	0.4138	-0.9524	-0.9964	0.7095	1.2355	2.7484
Temsirolimus	1.1383	0.1331	0.3375	-0.8192	-1.4118	-0.0286	0.391	0.9498
HSP-BIBW	1.1401	1.1516	0	-1.1224	-0.255	-0.8089	-0.9124	1.7408
HSPI-2	1.1082	1.3584	0.0096	-1.1421	-0.2794	-0.7064	-0.8577	1.7997
HSPI-3	1.3906	1.6233	-0.0074	-1.1707	-0.1776	-0.8219	-0.9382	1.9296
HSPI-4	1.4165	1.4236	-0.0201	-1.2146	-0.4022	-0.9069	-1.1964	2.785
Gefitinib	1.3355	-0.0919	0.1177	-0.9474	-1.1727	0.683	1.2517	2.4968
AG1478	1.8722	0.0008	0.3119	-1.2205	-1.0968	0.3128	0.8553	2.4919
17-AAG	1.157	1.669	0.7225	-0.6215	-0.2515	-0.7131	-0.2863	1.3161
Gliotoxin	0.665727	-0.360641	0.515573	0.171109	0.37799	0	-1.27013	0.795434
